# Supplementary material for: T-ALL leukemia stem cell 'stemness' is epigenetically controlled by the master regulator SPI1
Source: eLife journal article supplement (doi:10.7554/elife.38314), 2018-11-09
Supplement: supp [file elife-38314-supp-v1.zip]

Archive with 9 entries (9 files):
- elife_poa_e38314_Figure_11_figure_supplement_1.pdf
- elife_poa_e38314_Supplementary_File_4.xlsx
- elife_poa_e38314_Figure_1_figure_supplement_2.pdf
- elife_poa_e38314_Supplementary_File_1.xlsx
- elife_poa_e38314_Figure_1_figure_supplement_1.pdf
- elife_poa_e38314_Transparent_Reporting_File.docx
- elife_poa_e38314_Supplementary_File_3.xlsx
- elife_poa_e38314_Supplementary_File_2.xlsx
- elife_poa_e38314_Figure_4_figure_supplement_1.pdf
