# Supplementary material for: T-ALL leukemia stem cell 'stemness' is epigenetically controlled by the master regulator SPI1
Source: eLife journal article supplement (doi:10.7554/elife.38314), 2018-11-09

A

| Cell Type      | LSC-enriched       |           | blasts           |
|----------------|--------------------|-----------|------------------|
| initiating     | Yes                |           | No               |
| MYC            | 30% low            | 70% high  | 100% high        |
| Rapamycin      | resistance         | sensitive | sensitive        |
| JQ1            | resistance         | sensitive | sensitive        |
| BrdU           | Low                | high      | high             |
| Surface marker | KIT <sup>mid</sup> |           | KIT <sup>-</sup> |

B

## Bulk RNA-seq procedure

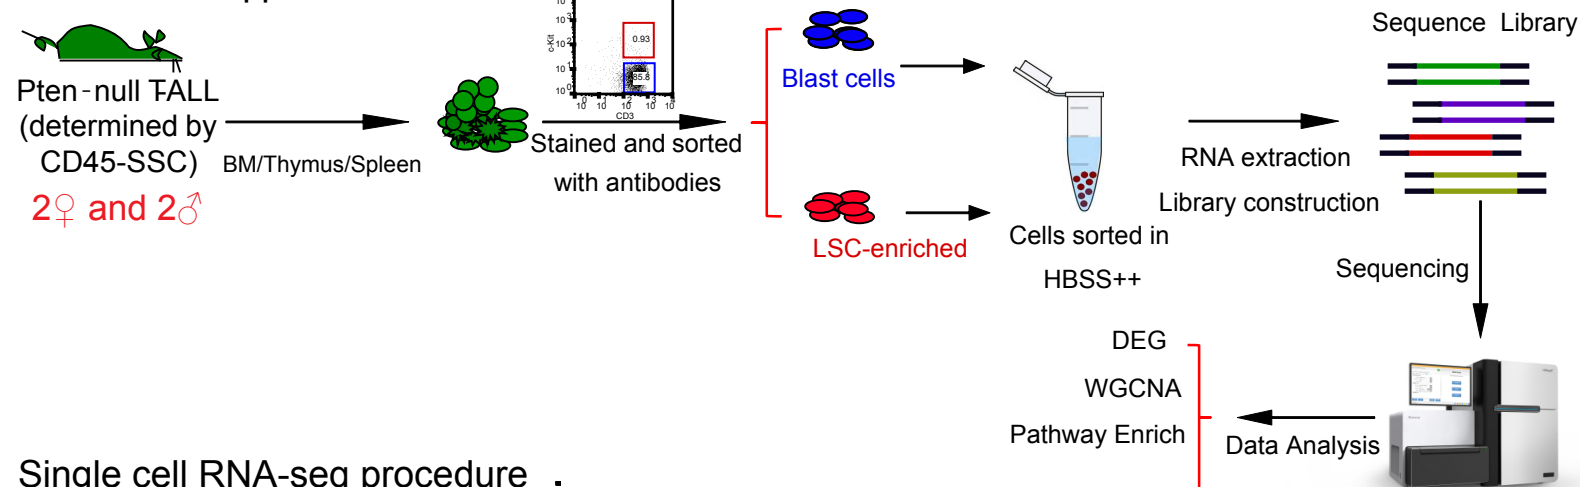

## Single cell RNA-seq procedure

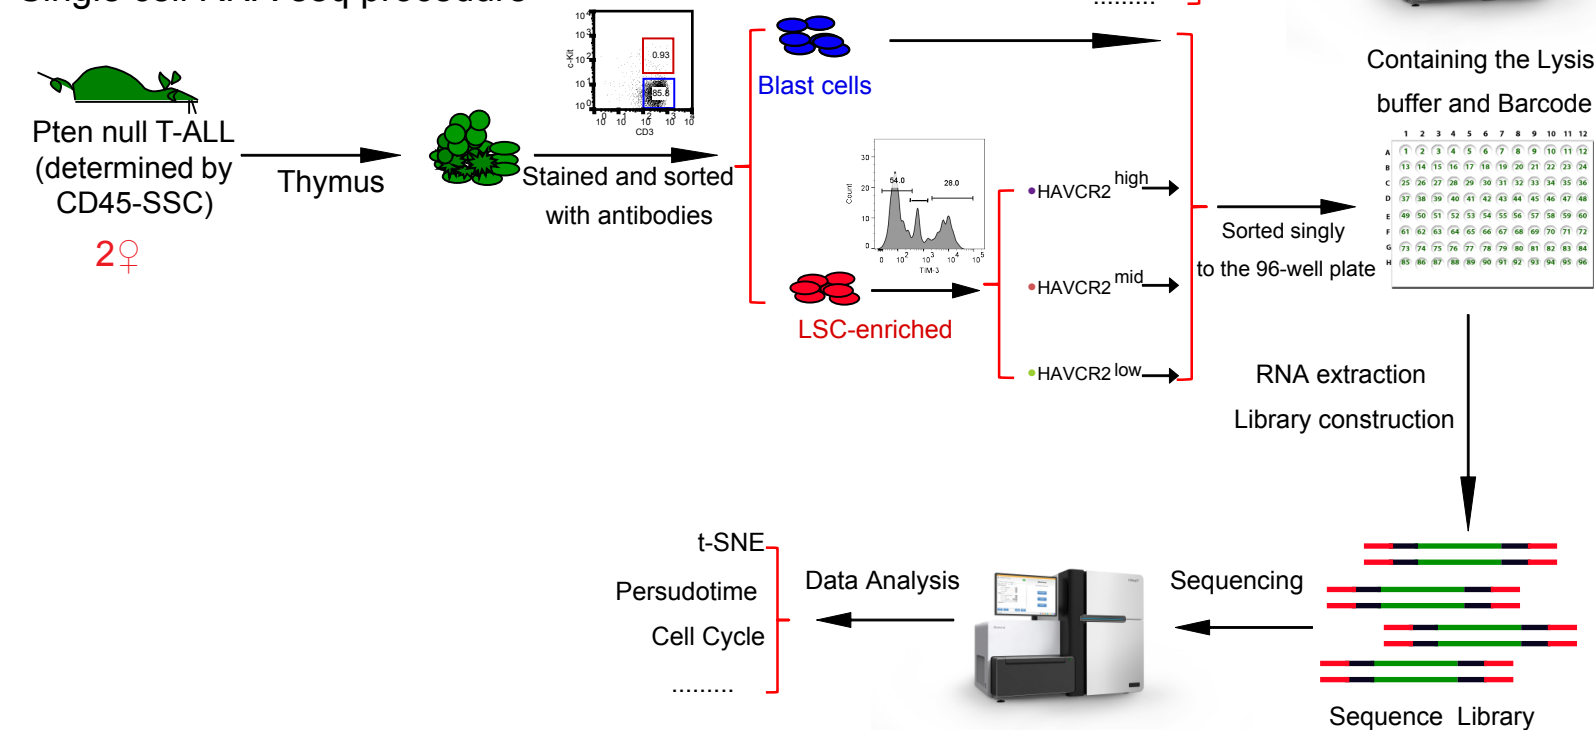

Supplement: supp [file elife-38314-supp-v1.zip › elife_poa_e38314_Figure_1_figure_supplement_1.pdf]
