# Supplementary material for: T-ALL leukemia stem cell 'stemness' is epigenetically controlled by the master regulator SPI1
Source: eLife journal article supplement (doi:10.7554/elife.38314), 2018-11-09

## A Cell numbers for the single-cell analysis

|        | HAVCR2 <sup>high</sup> | HAVCR2 <sup>mid</sup> | HAVCR2 <sup>low</sup> | Blast   |
|--------|------------------------|-----------------------|-----------------------|---------|
| Mouse1 | 39 (37)                | 22 (17)               | 29 (22)               | 29 (25) |
| Mouse2 | 56 (53)                | 48 (19)               | 56 (54)               | 57 (49) |
| Total  | 95 (90)                | 70 (36)               | 85 (76)               | 86 (74) |

## B Average number of transcripts

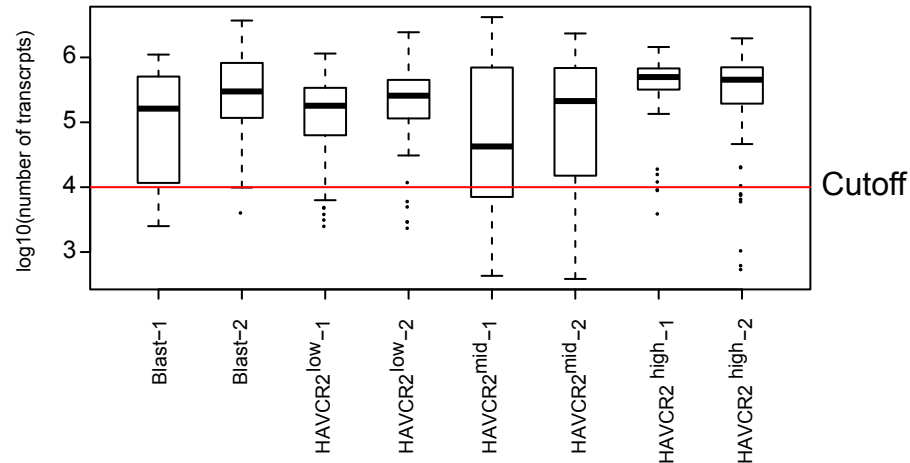

## C Average number of genes

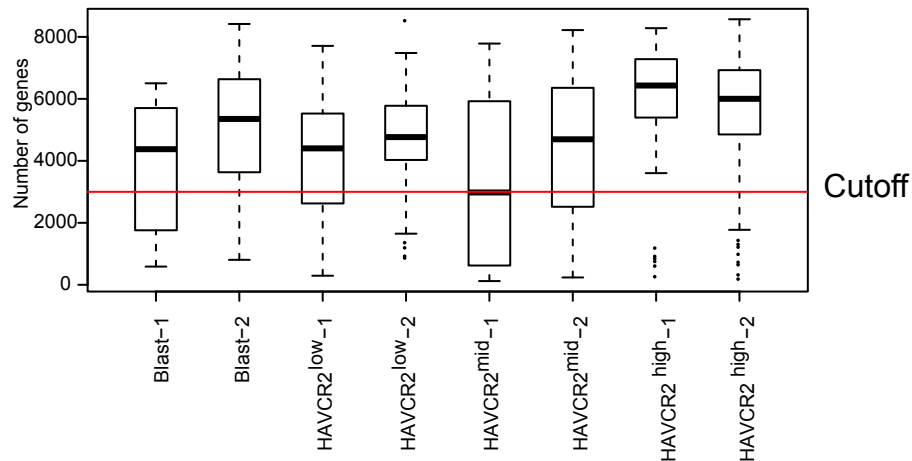

## D The Mapping ratio

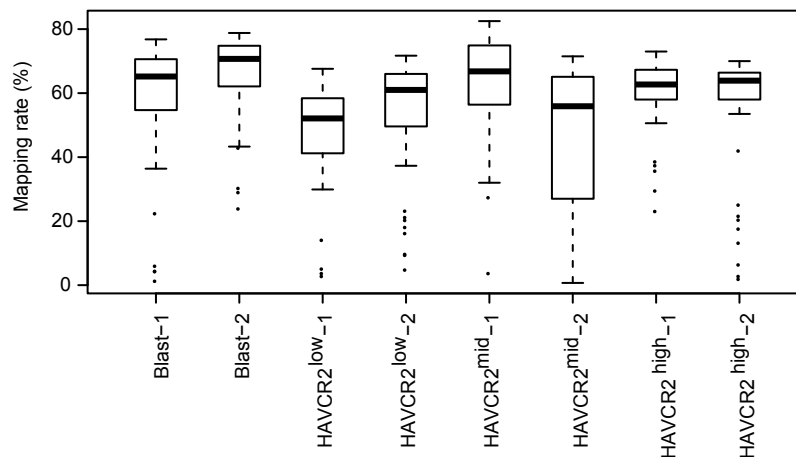

Supplement: supp [file elife-38314-supp-v1.zip › elife_poa_e38314_Figure_1_figure_supplement_2.pdf]
