# Supplementary material for: T-ALL leukemia stem cell 'stemness' is epigenetically controlled by the master regulator SPI1
Source: eLife journal article supplement (doi:10.7554/elife.38314), 2018-11-09

A

|                 | Target              | In vivo doses             | Reference                 |
|-----------------|---------------------|---------------------------|---------------------------|
| Rapamycin       | mTOR                | 4 mg/kg/day               | Guo et al., 2011          |
| DB1976          | SPI1                | 2.5 mg/kg/day             | Antony-Debre et al., 2017 |
| Bay1082439      | PI3K                | 40 mg/kg/day              | Hill et al., 2017         |
| Bay6060         | Tankyrase/b-catenin | 10 mg/kg/day              | Our unpublished data      |
| HAVCR2 antibody | HAVCR2              | 200 ug/Mouse Twice a week |                           |
| IgG antibody    | —                   | 200 ug/Mouse Twice a week |                           |

B

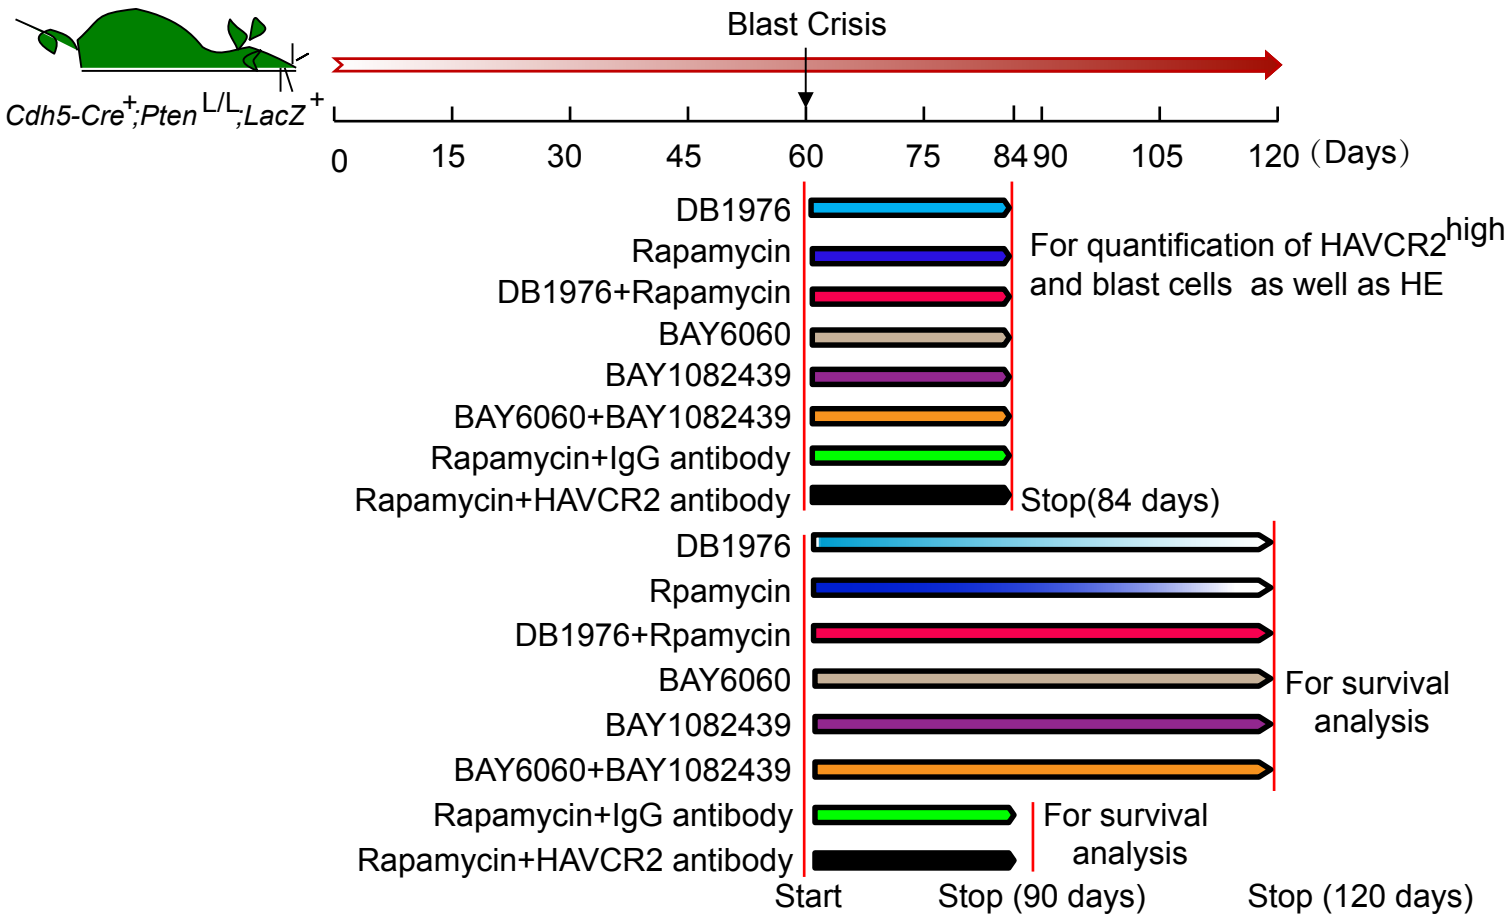

C

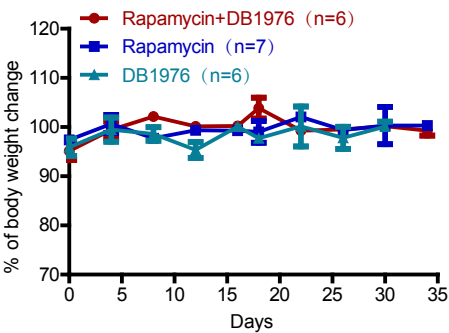

D

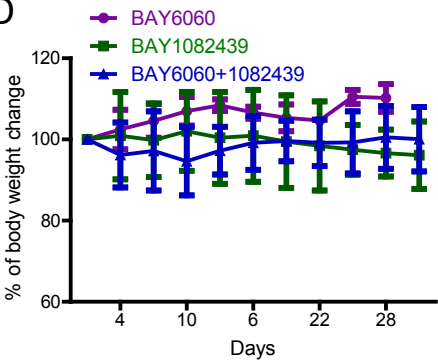

E

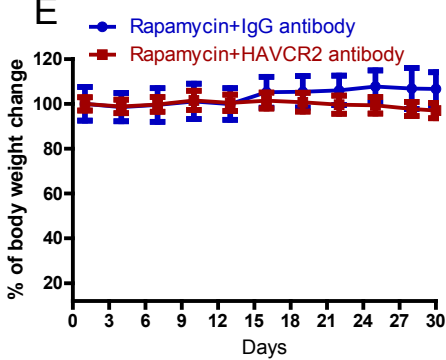

Supplement: supp [file elife-38314-supp-v1.zip › elife_poa_e38314_Figure_11_figure_supplement_1.pdf]
