# Supplementary material for: T-ALL leukemia stem cell 'stemness' is epigenetically controlled by the master regulator SPI1
Source: eLife journal article supplement (doi:10.7554/elife.38314), 2018-11-09
Supplement: supp [file elife-38314-supp-v1.zip › elife_poa_e38314_Supplementary_File_1.xlsx]

## Sheet: Supplementary File 1
Supplementary File 1. Primers used for genotyping in this study.			Refernce
Pten loxp/loxp	Pten6637-F	5' TCCCAGAGTTCATACCAGGA 3'	Guo et al., 2008
	Pten6925-R	5' GCAATGGCCAGTACTAGTGAAC 3'
	Pten7319-R	5' AATCTGTGCATGAAGGGAAC 3'
Cre	Cre-F	5' CGTATAGCCGAAATTGCCAG 3'	Guo et al., 2008
	Cre-R	5' CAAAACAGGTAGTTATTCGG 3'
Spi1 loxp/loxp	SPI1-B	5' TGTGGCCCCTGGGAGTGCTTTGAA 3'	Dakic et al., 2005
	SPI1-C	5' CACCCGCTTTGCCTCCCACCAG 3'
Spi1GFP	SPI1-A	5' TGGCGCCTACCGGTGGATGTG G 3'	Nutt et al., 2005
	SPI1-B	5' TGTGGCCCCTGGGAGTGCTTTGAA 3'
