# Supplementary material for: T-ALL leukemia stem cell 'stemness' is epigenetically controlled by the master regulator SPI1
Source: eLife journal article supplement (doi:10.7554/elife.38314), 2018-11-09
Supplement: supp [file elife-38314-supp-v1.zip › elife_poa_e38314_Supplementary_File_2.xlsx]

## Sheet: Supplementary File 2
Supplementary File 2. Primers used for q-PCR in this study.
Mouse primers for q-PCR	Sequence
Actin Forward	5' TGTGATGGTGGGAATGGGTCAG 3'
Actin Reverse	5' TTTGATGTCACGCACGATTTCC 3'
Myc Forward	5' GTGCTGCATGAGGAGACACC 3'
Myc Reverse	5' TTTGCCTCTTCTCCACAGACA 3'
Lmo2 Forward	5' TGGGTGAGGCATTTCTTAGG 3'
Lmo2 Reverse	5' GCCTATCAGGATGGCACAGT 3'
Havcr2 Forward	5' CCCCTGCCAAGTACTCATGT 3'
Havcr2 Reverse	5' CAAGTGCCCCAGGTGTAGAT 3'
Itgax Forward	5' GAGTCAGGGCCTCTGGAGTA 3'
Itgax Reverse	5' GGTTTTTGGGGTTCCGGGTA 3'
Spi1 Forward	5' AGCGATGGAGAAAGCCATAG 3'
Spi1 Reverse	5' TGCAGCTCTGTGAAGTGGTT 3'
Human primers for q-PCR	Sequence
Actin Forward	5' GGAACGGTGAAGGTGACAGC 3'
Actin Reverse	5' AATCAAAGTCCTCGGCCACA 3'
MYC Forward	5' TCCACCTCCAGCTTGTACCT 3'
MYC Reverse	5' GCTGTCGTTGAGAGGGTAGG 3'
LMO2 Forward	5' AGGCAATTAGCCCAGAAGGT 3'
LMO2 Reverse	5' CTCCTCTCTCGGGAAGGTCT 3'
HAVCR2 Forward	5' GCTACTACTTACAAGGTCCTCAG 3'
HAVCR2 Reverse	5' ATTCACATCCCTTTCATCAGTC 3'
ITGAX Forward	5' GTGGTGGTGTGATGCTGTTC 3'
ITGAX Reverse	5' ATACTGCAGCCTGGAGGAGA 3'
SPI1 Forward	5' GCTCTAGAATGTTACAGGCGTGCAAAATGG 3'
SPI1 Reverse	5' CGGAATTCTCAGTGGGGCGGGTGGC 3'
ChIP primers for q-PCR	Sequence
Myc E1 Forward	5' GTGGTGTGGGGTGGCTAATA 3'
Myc E1 Reverse	5' ACGCTCAGAGTGCTTTCCAT 3'
Myc E2 Forward	5' GCTGCTCGGTCATTTCTCTT 3'
Myc E2 Reverse	5' AACCATAAAAAGCCGTGGTG 3'
Myc E5 Forward	5' TGCTTCTCCTGAACCACCTT 3'
Myc E5 Reverse	5' GCAACAGCAAGAACCAGTGA 3'
EαForward	5' GCCAGAAGTAGAACAGGAAATGGA 3'
EαReverse	5' GGGACCTGTTTGCCCATGT 3'
Eβ Forward	5' GACTGAGAACCCAACAGAGATGC 3'
Eβ Reverse	5' GCCTTGGTTCCATATATTCATGACT 3'
Negative region Forward	5' AACCTCACACACAACAAGCTG 3'
Negative region Reverse	5' TGTGATAGGGAGAATGCTTGC 3'
Myc promoter F	5' TCGAGCTCATTGCACAATTC 3'
Myc promoter R	5' GGTGGCTCTTGGTGTTTGAG 3'
HAVCR2-0Forward	5' CTCTCAGGAAGGGCTGACAC 3'
HAVCR2-0Reverse	5' GGAAGGGGGACTTTGAACAT 3'
HAVCR2-1Forward	5' CTCTCAGGAAGGGCTGACAC 3'
HAVCR2-1 Reverse	5' GGAAGGGGGACTTTGAACAT 3'
HAVCR2-2Forward	5' AGTGCCTTGCAGGGTGTATC 3'
HAVCR2-2Reverse	5' TCCTGAGTCCCCAGAATCAC 3'
HAVCR2-3Forward	5' AAGGAGGAGGGATGTCCTGT 3'
HAVCR2-3Reverse	5' ACCAGACCAGGAACGATGAC 3'
HAVCR2-4Forward	5' CTAGGCACCTCAGCCTTTTG 3'
HAVCR2-4Reverse	5' GGAGGGTCACCAGTGTCTGT 3'
