# Supplementary material for: T-ALL leukemia stem cell 'stemness' is epigenetically controlled by the master regulator SPI1
Source: eLife journal article supplement (doi:10.7554/elife.38314), 2018-11-09
Supplement: supp [file elife-38314-supp-v1.zip › elife_poa_e38314_Supplementary_File_3.xlsx]

## Sheet: Bulk-RNA-seq FPKM
Supplementary File 3. List of FPKM for Bulk RNA-seq in T-ALL.
Gene name	M1_Blast_BM	M1_LIC_BM	M2_Blast_BM	M2_LIC_BM	M3_Blast_BM	M3_LIC_BM	M4_Blast_BM	M4_LIC_BM	M1_Blast_Spleen	M1_LIC_Spleen	M2_Blast_Spleen	M2_LIC_Spleen	M3_Blast_Spleen	M3_LIC_Spleen	M4_Blast_Spleen	M4_LIC_Spleen	M1_Blast_Thymus	M1_LIC_Thymus	M2_Blast_Thymus	M2_LIC_Thymus	M3_Blast_Thymus	M3_LIC_Thymus	M4_Blast_Thymus	M4_LIC_Thymus
0610005C13Rik	0	0	0	0	0	0	0.38804	0	0	0.285123	0	0	0	0	0	0	0.327467	0.327796	0	0.321549	0	0	0	0
0610007P14Rik	54.6069	41.3237	70.9168	49.37	63.5618	66.3676	43.2995	36.9916	46.6239	53.9204	60.4693	52.935	56.7011	92.2349	49.4725	20.4832	53.0616	61.4468	69.8781	51.2528	60.0763	41.6209	45.9342	23.374
0610009B22Rik	32.3185	22.3009	22.0495	12.0856	21.0955	18.3801	23.7974	4.05058	29.3643	20.383	23.4975	15.2996	24.3794	0	29.6894	15.9453	24.8372	21.704	25.5967	20.8079	31.8663	30.7036	29.1127	8.0641
0610009L18Rik	2.61038	3.02507	1.29525	7.0369	2.93767	0	4.1569	0	2.71287	1.8871	5.23928	4.2705	2.52548	0	1.98709	17.4119	3.35128	2.83523	1.38826	2.1592	3.36562	0	2.23617	0
0610009O20Rik	13.9337	15.1504	12.2855	13.1971	16.4174	6.93991	17.4314	18.7614	15.3263	12.8546	13.0941	12.8158	15.8411	26.5237	19.5037	22.0549	17.5412	12.3076	11.9441	10.9217	18.5681	13.9191	19.8447	24.6843
0610010B08Rik	0	0	0	0	0	0	0	0	0	0	0	0	0	0	0	0	0	0	0	0	0	0	0	0
0610010F05Rik	7.64939	6.85752	18.1041	14.4196	11.1392	25.7371	9.98092	15.0558	8.77136	9.26032	16.3235	10.188	13.4521	7.90316	11.0995	4.92635	8.33203	6.13042	15.2299	10.5396	17.9449	11.6197	7.96924	3.50701
0610010K14Rik	56.0378	63.5454	41.82	50.6845	56.7376	33.6973	55.6925	42.9599	42.8068	57.3018	39.5031	46.5632	48.007	7.21368	51.571	107.671	54.045	62.6628	48.532	68.1126	118.573	40.8562	46.0155	80.0117
0610011F06Rik	35.645	34.0406	20.0057	20.174	28.2164	57.2955	25.9339	19.6234	29.0325	31.2958	26.7554	30.7558	25.1463	72.0195	21.0852	35.8428	28.2302	48.8754	18.6726	11.5691	26.3435	50.7136	34.2541	42.9764
0610012G03Rik	39.1935	51.6671	43.744	47.0157	36.35	14.0199	48.6591	45.1656	40.4993	37.3827	45.9366	54.2433	28.6807	27.1464	32.8089	35.3957	41.1247	51.3342	41.4529	34.5377	26.3805	29.9259	35.9112	60.72
0610012H03Rik	0	0	0	0	0	0	0	0	0	0	0	0	0	0	0	0	0	0	0	0	0.244768	0	0	0
0610030E20Rik	26.5261	22.9768	33.0116	37.7192	29.1826	36.7413	28.1503	49.4024	27.279	24.3245	26.8662	33.0513	31.648	19.2034	37.903	39.474	27.7886	21.0684	31.3507	39.1974	31.852	34.8086	37.6248	26.4441
0610031J06Rik	25.9285	44.3437	20.0113	26.5808	29.6496	35.0031	36.4167	43.6436	26.9945	31.4703	24.7153	31.0987	29.7098	28.587	27.5879	49.112	36.1452	32.5085	23.6227	19.154	26.8447	35.1746	32.4389	35.3206
0610031O16Rik	0	0	0	0	0	0	0	0	0	0	0	0	0.537042	0	0	0	0	0	0	0	0.539242	0	0	0
0610037L13Rik	20.3139	17.2768	12.6093	11.2934	13.3566	16.4126	14.6751	19.6599	14.6129	18.8679	13.1248	14.7791	15.7406	33.6342	16.5707	9.53204	17.8732	18.2126	14.1818	16.3618	13.268	11.8755	14.6601	17.1662
0610038B21Rik	0	0	0.398097	0	0.413775	0.000328386	0.436291	0	0	0	0	0.286031	0.339578	0	0	0	0.323698	0	0	1.23615	0	0	0	0
0610039K10Rik	0	0	0	0.664242	0	0	0	0	0	0.351588	0	0.306076	0	0	0	0	0	0	0	4.61654	0	0	0	0
0610040B10Rik	1.16518	3.11529	7.00227	3.00042	5.36602	0	1.39538	0	3.13497	3.28795	1.33445	4.46536	3.27116	0	1.17132	0	6.78108	3.60991	3.73627	0	4.82956	13.0847	0.97713	0
0610040F04Rik	0	0	0	0	0	0	0	0	0	0	0	0	0	0	0	0	0	0	0	0	0	0	0	0
0610040J01Rik	0	0	0.156919	0	0	0	0	0	0	0.157762	0	0.139866	0	0	0	0	0	0	0	0.420193	0	0	0	4.93353
0610043K17Rik	0	0	0	0	0	0	0	0	0	0	0	0	0	0	0	0	0	0	0	0	0	0	0	0
1010001N08Rik	0	0	0	0	0	0	0	0	0	0	0	0	0	0	0	0	0	0	0	0	0	0	0	0
1100001G20Rik	2.34057	0	2.34451	9.03678	3.23431	0	0	10.4903	1.57391	1.10053	0	0	0	0	0	0	0	3.62401	0	0	0	0	0	0
1110001A16Rik	6.76621	6.71502	7.11848	5.9232	6.43934	5.99286	6.28353	11.4485	4.63294	3.44608	9.26889	9.49834	7.40982	9.72817	4.83126	9.58016	5.94208	4.50516	8.14742	3.855	5.90903	6.03213	6.51582	0
1110001J03Rik	90.4898	85.8471	88.3029	53.796	98.2879	136.044	58.3847	81.2177	92.1056	69.8544	104.966	77.4065	87.872	101.529	27.992	25.5195	71.3936	106.679	68.1985	40.8297	75.2918	57.3106	42.8152	52.7292
1110002L01Rik	16.2643	16.3178	16.5539	21.1429	21.7265	7.69548	16.296	6.13363	20.5457	16.5602	15.3501	13.1704	25.2896	19.5944	22.382	17.7866	18.8412	13.7964	18.8868	11.853	29.9346	17.1637	21.7857	9.02205
1110004E09Rik	22.7441	25.9911	16.668	20.1505	22.2906	64.8132	22.2719	28.4413	21.629	23.9752	20.0482	23.8939	18.7568	4.02875	15.0374	15.3488	25.7414	36.6768	17.9102	8.87495	20.2379	19.7553	16.192	20.757
1110004F10Rik	115.521	101.347	169.758	121.513	130.942	174.589	96.3308	100.259	126.979	117.076	146.845	113.242	135.807	52.9134	102.348	26.6009	103.243	109.069	173.292	118.784	144.95	125.075	79.3253	34.2805
1110006O24Rik	4.30384	3.14785	2.83773	3.49483	5.54712	31.4346	6.85441	0	4.01812	5.11472	1.64567	2.40332	3.58836	0	8.28099	0	4.54957	4.76074	5.58278	10.9002	8.39977	0	6.606	0
1110007C09Rik	4.00717	9.23637	2.20035	0.816053	5.15597	0	6.99232	1.32261	2.49913	6.93828	3.5753	4.12109	3.87518	0	3.63081	6.64818	3.08686	5.9308	1.88936	4.15091	1.6672	9.6835	6.54482	4.82758
1110008F13Rik	107.201	130.807	115.496	114.083	118.013	167.388	113.589	104.923	107.392	108.778	131.889	108.565	134.294	158.487	127.141	70.9311	150.773	147.83	123.947	79.0913	95.2543	55.0338	106.436	24.7774
1110008L16Rik	15.8417	11.7618	16.4045	12.5231	20.5559	15.642	13.1369	14.3609	16.4062	15.9802	16.5066	13.5009	19.2398	13.201	19.1096	18.1573	14.8364	15.0715	21.5005	8.861	17.0079	14.8089	13.6014	6.92088
1110008P14Rik	32.82	43.347	26.028	18.866	41.2501	0	63.5513	75.7176	29.8681	44.4123	30.1154	30.4918	32.0111	36.9405	62.4546	128.985	53.8059	43.0256	29.8109	38.7506	27.459	53.5804	61.4952	94.309
1110012L19Rik	13.4797	20.9191	17.9245	13.3839	22.466	0	21.7101	38.9343	21.73	16.2899	20.8597	13.1651	18.6648	4.55488	23.7114	9.5767	16.1576	13.7637	19.9197	14.8452	21.0835	21.0088	16.0886	17.0242
1110015O18Rik	0	0	0	0	0	0	0	0	0	0	0	0	0	0	0	0	0	0	0	0	0	0	0	0
1110017D15Rik	0	0.547443	0	0	0	0	0	0	0	0	0	0	0	0	0	0	0	0	0	0	0	0	0	0
1110019D14Rik	1.44176	0.990628	0.607869	0	1.26863	9.03393	1.66991	0	0.879946	1.42133	0.945278	1.2547	0.98285	0	2.11001	0	1.63009	0.469182	1.52478	3.05443	2.22983	0	0.720182	0
1110020A21Rik	2.89748	3.13054	1.63547	1.21726	3.3131	0	2.71977	0	4.07368	2.42268	1.42454	1.39924	4.09465	2.25752	3.37765	0	2.5158	2.30503	1.75576	0	2.05646	0	4.30104	0
1110025L11Rik	0	0	0	0	0	0	0	0	0	0	0	0	0	0	0	0	0	0	0	0	0	0	0	0
1110028F11Rik	0.106281	0	0.31306	0	0.186091	0	0.291177	0	0	0.21062	0	0.375323	0.249372	0	0.218214	0	0	0.122381	0	0.469289	0.125945	0	0.0933321	0.993639
1110028F18Rik	0	0	0	0	0	0	0	0	0	0	0	0	0	0	0	0	0	0	0	0	0	0	0	0
1110032A03Rik	2.86612	2.27767	3.31478	4.1265	2.22102	0	2.28984	12.0075	2.40656	1.66524	3.67552	2.50769	3.39773	0.611585	2.5928	3.0383	3.86362	2.12094	2.67327	3.69371	3.02497	8.32816	2.36211	2.60129
1110032F04Rik	28.233	25.3109	35.0952	28.9538	21.7809	23.3142	3.06701	0	26.8013	31.0744	30.468	29.1545	17.8927	13.6076	4.71505	4.78877	25.8636	28.7507	32.6628	19.6751	24.051	13.6804	4.22948	4.76733
1110034G24Rik	13.4645	14.161	13.2472	5.52265	14.2574	23.86	11.3647	7.12044	10.4834	12.0266	11.828	12.808	11.3027	9.9251	9.48229	8.18093	12.577	15.3285	10.2355	5.86965	10.3829	6.79043	12.3193	14.6192
1110036E04Rik	0	0	0	0	0	0	0	0	0	0	0	0	0	0	0	0	0	0	0	0	0	0	0	0
1110037F02Rik	18.1275	12.911	20.1753	18.1254	21.0206	26.3456	37.7063	41.4475	16.621	15.7432	19.0027	16.6752	21.6496	22.2388	44.2316	32.6136	13.8304	14.2428	20.3003	13.6583	20.0542	20.8221	41.6407	39.1177
1110038B12Rik	139.655	102.539	105.227	125.687	131.132	77.2594	93.4339	122.799	185.468	134.953	101.402	127.984	146.167	103.912	89.0927	82.7448	141.599	165.137	102.415	89.9056	123.326	128.007	94.2133	73.448
1110038F14Rik	46.3557	59.1745	36.7879	55.1044	52.1663	47.1442	37.3454	43.2413	48.5817	52.2708	43.8589	40.0585	45.9869	6.0131	27.0827	39.3974	47.6328	62.7764	42.0731	39.1945	31.2274	59.1841	29.8668	60.3572
1110046J04Rik	0	0.439776	0	0	0	0	0	0	0	0	0	0	0	0	0	0	0	0	0	0	0	0	0	0
1110051M20Rik	4.63094	6.7862	6.31237	4.3677	4.71847	0	2.84797	0	5.97772	4.57854	2.91395	2.09705	5.64872	0.5418	1.53219	0	6.06394	4.45128	4.89403	8.3983	4.98877	6.7317	3.27313	1.233
1110054M08Rik	2.47968	5.47002	1.63295	1.13978	2.94034	1.23847	2.71687	0	1.16218	3.22535	0.948211	2.09577	2.55487	0	2.10558	0	2.51318	0.920708	0.4383	2.80542	3.07977	0	1.43149	0
1110057K04Rik	22.6442	24.6651	29.7409	22.96	29.4986	73.0683	31.8174	19.1336	25.3809	26.0498	32.3958	28.2744	30.8673	27.975	36.0431	40.4559	25.4682	26.3939	30.8794	23.891	30.6529	27.701	36.3581	29.3035
1110058L19Rik	27.3679	19.0025	20.7748	14.2212	21.4174	13.8542	8.98265	15.2602	14.5856	18.0237	20.7048	11.0595	22.9968	0	13.6129	2.54885	22.021	11.4677	24.1341	12.6257	23.7642	7.64638	10.0078	0
1110059E24Rik	26.7703	21.3338	39.8341	33.8475	29.8932	65.472	21.7289	36.3444	27.5654	23.8021	39.9548	25.9055	28.8778	21.3267	35.8887	0	23.333	22.5296	36.1433	55.5498	43.0126	36.0726	26.6215	6.22039
1110059G10Rik	5.38272	3.18797	8.50206	4.31127	6.76647	8.82612	3.92919	0.791558	3.25857	4.50532	9.651	5.66144	6.78319	5.94458	5.18292	2.14114	3.80045	3.10668	8.25918	4.84113	7.35097	6.11817	4.87963	0
1110059M19Rik	0	0	0	0	0	0	0	0	0	0	0	0	0	0	0	0	0	0	0	0	0	0	0	0
1110065P20Rik	32.3298	52.2171	29.6212	33.367	34.3682	12.8519	31.5026	3.77204	33.9244	58.8295	42.7611	36.8172	32.1198	10.8624	24.7888	12.5088	42.465	36.0886	40.0902	33.6551	21.4363	29.553	25.8478	28.0945
1190002F15Rik	17.9508	34.5477	16.4095	17.3147	22.0512	73.214	23.5864	1.36701	23.7856	28.2847	18.9391	22.7072	27.1723	54.9374	25.4734	0	46.5253	20.9153	18.3437	23.5787	26.1809	53.7593	16.8618	21.0747
1190002N15Rik	18.8466	15.8561	32.6045	18.3855	28.42	24.4759	20.9695	19.6748	18.9263	14.1369	26.7486	17.7938	26.9388	8.21697	21.6187	23.4487	18.22	10.2382	25.0584	20.4878	36.4979	21.3615	25.6141	11.3247
1190003K10Rik	0	0	0	0	0	0	0	0	0	0	0	0	0	0	0	0	0	0	0	0	0	0	0	0
1190005I06Rik	2.02624	3.32674	1.50383	1.38452	2.716	0	1.31527	0	0.70817	1.96738	0.581069	0	1.91015	25.808	0.515696	0	4.81109	2.23464	0	5.54084	0.638406	0	0	0
1190007I07Rik	16.4416	20.7703	26.6584	38.469	27.1548	32.5608	12.2421	13.6887	21.7656	20.8269	27.3888	26.9444	51.2528	1.79849	14.5962	0	17.1032	11.9771	24.258	9.82859	32.1748	61.6361	16.1806	25.7897
1200014J11Rik	15.2406	13.0802	16.5687	15.771	13.5284	11.943	14.8018	15.1679	13.4685	13.8949	14.7408	17.226	15.42	7.41535	12.3095	13.4363	12.2611	16.6114	15.1194	9.84403	14.4166	10.0436	11.8886	9.22935
1300002E11Rik	23.8148	30.4662	27.2033	19.8093	34.3984	21.1745	31.6459	24.4148	23.7759	27.4123	29.2451	23.325	43.1502	12.3284	41.3073	49.9661	28.6569	25.429	30.4327	18.9837	38.5804	41.3857	34.0189	23.9046
1300002K09Rik	0	0.226647	0	0	0	0	0	0	0	0	0	0	0	0	0	0.556912	0	0	0	0	0	0	0	0
1300017J02Rik	0	0	0	0	0	0	0	0	0	0.126217	0	0	0	0	0	0	0.11268	0	0	0	0	0	0	0
1500004A13Rik	4.57432	3.54358	6.16267	7.29093	2.98219	6.01553	3.62536	10.713	4.00679	3.3852	6.31663	6.11748	4.07358	7.1656	3.82276	9.63364	3.57353	3.22416	5.40274	10.4444	3.75081	5.30661	4.09052	2.34636
1500009C09Rik	0	0.191886	0	0	0	0	0	0	0	0	0	0	0	0	0	0	0	0	0	0	0	0	0	0
1500009L16Rik	5.37835	2.57318	2.11903	0.501352	0.71216	0	0.360301	7.65428	2.28884	4.4924	3.08533	2.78326	0.972812	0.488214	1.10052	6.00272	2.59125	8.21354	3.41561	1.62956	0.6532	0	1.172	0
1500011B03Rik	92.4247	63.3787	182.042	120.423	66.0001	114.628	48.9307	26.1623	63.4829	63.0671	145.534	118.266	65.2093	5.37902	50.1247	26.3634	78.7124	89.5011	146.196	101.266	48.5801	21.7255	47.6571	14.2008
1500011K16Rik	40.8249	51.0545	24.9992	30.9105	34.7823	71.0455	25.5576	24.6115	44.215	44.5188	29.0156	33.6119	34.199	20.9807	14.9274	6.62758	50.7671	39.4124	27.7741	21.441	38.7619	62.7276	18.0351	3.93749
1500012F01Rik	16.5581	13.657	8.44021	10.5189	16.1376	21.7159	12.3844	0	16.1383	12.6699	15.5403	13.4056	22.0552	50.2118	12.7715	0	18.6342	31.0043	10.6538	17.3192	17.6926	4.37641	16.4446	13.2409
1500012K07Rik	0	0	0	0	0	0	0	0	0	0	0	0	0	0	0	0	0	0	0	0	0	0	0	0
1500015A07Rik	12.8418	15.1906	15.4623	15.7281	10.2872	15.0838	13.3139	0	11.9209	11.5789	14.7349	14.6235	7.98159	3.2024	8.3948	0	15.7127	12.6782	12.3856	15.7711	11.89	7.92648	9.7024	9.91952
1500015L24Rik	0	0	0	0	0	0	0	0	0	0	0	0	0	0	0	0	0	0	0	0	0	0	0	0
1500015O10Rik	0	0	0	0	0	0	0	0	0	0	0	0	0	0	0	0	0	0	0	0	0	0	0	0
1500017E21Rik	0.00028298	0.000100093	0	0	0.000491693	9.51774	0	0	0	0.214037	0	0	0	0.195801	0	0	0.37365	0.103998	0	0	0	0	0.000524675	0
1600002D24Rik	0	0	0	0	0	0	0	0	0	0.159286	0	0	0	0	1.29272	0	0	0	0	0	0	0	0	0
1600002H07Rik	10.6599	8.33082	11.0098	12.3896	8.38816	26.1267	10.813	7.37138	11.9235	11.4926	10.0362	9.12957	10.7969	12.8858	9.39409	2.80012	8.32794	7.84221	10.9748	11.0619	7.321	11.7238	11.2656	17.0955
1600002K03Rik	15.656	16.2556	15.5217	20.1152	11.8962	0	15.442	23.312	15.9018	16.2924	14.5039	14.8773	14.627	0	16.5186	14.0111	15.5079	20.3812	15.362	27.5552	15.4067	22.4238	14.9929	31.8901
1600010M07Rik	0	0	0	0	0	0	0	0	0	0.632045	0	0	0.846479	0	0	0	0	0	0	0	0	0	0	0
1600012H06Rik	12.1104	11.7746	14.2203	14.9887	10.6881	12.6403	10.6947	8.07918	7.72233	9.84196	12.2488	10.3889	13.2537	3.1429	13.3726	14.5538	11.5684	7.12225	15.314	16.9648	14.8922	18.824	16.2718	5.86992
1600014C10Rik	12.0934	14.9068	11.6957	9.84821	15.2399	3.70573	14.0038	18.2495	13.7251	8.41465	13.4656	8.54715	17.1103	0.163586	16.8715	4.7344	12.6319	10.0985	12.0108	7.02905	13.4461	9.07977	16.5798	11.4692
1600014C23Rik	0	0	0	0	0	0	0	0	0	0	0	0	0	0	0	0	0	0	0	0	0	0	0	0
1600014K23Rik	0	0	0	0	0	0	0	0	0	0	0	0	0	0	0	0	0	0	0	0	0	0	0	0
1600015I10Rik	0	0	0	0	0	0	0	0	0	0	0	0	0	0	0	0	0	0	0	0	0	0	0	0
1600016N20Rik	0.574219	0.416461	0.70527	0.270946	1.00733	0	0.782574	4.46237	0.205233	0.993809	0.65888	1.00845	0.338934	9.89189	0.736287	0.451945	0.760352	0.823132	0.303398	4.41674	0.171067	0	1.25849	0
1600019K03Rik	0	0	0	0	0	0	0	0	0	0	0	0	0	0	0	0	0	0	0	0	0	0	0	0
1600020E01Rik	12.0757	8.59502	4.23406	12.0622	8.16877	0	12.5764	3.38485	7.84715	2.73077	3.25849	8.64863	9.95547	1.29383	13.6821	0	5.94013	7.90637	5.63716	4.66916	5.27622	35.9641	7.28323	0
1600023N17Rik	0.333623	0.635022	0	0	0	0	0.443129	0	0.471375	0	0.38275	1.14051	0	0	0.340868	0	0.58219	0.374776	0.706833	0.573115	1.2277	0	0.579885	0
1600025M17Rik	0	0	0	0	0	0	0	0	0	0	0	0	0	0	0	0	0	0	0	0	0	0	0	0
1600027J07Rik	0	0	0	0	0	0	0	0	0	0	0	0	0	0	0	0	0	0	0	0	0	0	0	0
1600029I14Rik	0	0	0	0	0	0	0	0	0	0	0	0	0	0	0	0	0	0	0	0	0	0	0	4.43782
1600029O15Rik	0	0	0	0	0	0	0.22534	0	0	0.163838	0	0	0	0	0	0	0.146211	0	0.175311	0	0	0	0	0
1700001C02Rik	0	0	0	0	0	0	0	0	0	0	0	0	0	0	0	0	0	0	0	0	0	0	0	0
1700001C19Rik	0	0	0	0	0	0	0	0	0	0	0	0	0	0	0	0	0	0	0	0	0	0	0	0
1700001D01Rik	0	0	0	0	0	0	0	0	0	0	0	0	0	0	0	0	0	0	0	0	0	0	0	0
1700001F09Rik	0	0	0	0	0	0	0	0	0	0	0	0	0	0	0	0	0	0	0	0	0	0	0	0
1700001G11Rik	0.475628	0.447365	0.470383	0	0.424346	2.84263	1.23996	0	1.33237	0.925058	0	0.398537	0	0	0.484518	0	0.411433	0	0	0	1.19302	11.3946	0.410698	0
1700001G17Rik	2.74719	2.23009	2.71248	3.25334	1.74322	0	1.55162	0	1.65749	1.91626	0.90045	3.65925	0.966924	0	0	0	1.36482	2.19048	2.9124	4.35135	0.971636	1.70299	1.02048	0
1700001J03Rik	0	0	0	0	0	0	0	0	0	0	0	0	0	0	0.475223	0	0	0	0	0	0	0	0	0
1700001J11Rik	0.587519	0.11388	0	0.333522	0.205859	0	0.160714	0	0	0	0	0.517851	0	0	0	0	0.207791	0.135138	0.248256	0	0.139478	0	0.103135	0
1700001K19Rik	0	0	0	0	0	0	0	10.7036	0	0	0	0	0	0	0	0	0.309831	0.398493	0.376775	0	0	0	0	0
1700001K23Rik	0	0	0	0	0	0	0	0	0	0	0	0	0	0	0	0	0	0	0	0	0	0	0	0
1700001L05Rik	0.228625	1.15924	0.89686	0.217857	0.239449	0	0.442145	0	0.197315	0.727177	1.31177	1.46616	0.318648	2.07096	0.329006	2.2712	2.27415	0.265029	1.25471	1.46468	0.161099	1.56259	0.281865	0
1700001L19Rik	0	0	0	0	0	0	0	0	0	0	0	0	0	0	0	0	0	0	0	0	0	0	0	0
1700001O22Rik	4.72987	3.92642	2.75006	3.82792	6.81351	0	7.81753	18.509	3.67202	6.60132	5.4269	5.03839	6.55731	1.92769	4.25108	6.70569	1.88956	5.16544	2.56245	7.11898	7.72196	4.16443	3.56942	0
1700001P01Rik	0	1.19332	0	0	0	0	0.820267	0	0.891628	0.620162	1.47515	0.526709	1.65634	0	0.652843	0	3.30433	2.79669	0.683942	0	0	0	1.6534	0
1700003C15Rik	0	0	0	0	0	0	0	0	0	0	0	0	0	0	0	0	0	0	0	0	0	0	0	0
1700003D09Rik	0.450085	0.21613	0	0.210678	0	0	1.21324	0	0.320104	0.443277	0	0.195312	0.269342	0	0	0	0.197665	0.255788	0.23806	1.95857	0.271492	0	0.589651	0
1700003E16Rik	0	0	0	0	0	0	0	0	0	0	0	0	0	0	0	0	0	0	0	0	0	0	0	0
1700003E24Rik	0	0	0	0	0	0	0	0	0	0	0	0	0	0	0	0	0	0	0	0	0	0	0	0
1700003F12Rik	0.508505	0.953995	1.00644	0	0.9089	9.86258	0	0	0	0.987369	0	0	0.639384	15.7296	0.517656	0	0.439	0	0	0	1.28211	0	0	0
1700003G13Rik	0	0	0	0	0	0	0	0	0	0	0	0	0	0	0	0	0	0	0	0	0	0	0	0
1700003G18Rik	0	0	0	0	0	0	0	0	0	0.624566	0	0	0	0	0	0	0	0	0	0	0	0	0	0
1700003H04Rik	0	0	0	0	0	0	0	0	0	0	0	0	0	0	0	0	0	0	0	0	0	0	0	0
1700003L19Rik	0	0	0	0	0	0	0	0	0	0	0	0	0	0	0	0	0	0	0	0	0	0	0	0
1700003M02Rik	0	0	0	0	0	0	0	0	0	0	0	0	0	0	0	0	0	0	0	0	0	0	0	0
1700003M07Rik	0	0	0	0	0	0	0	0	0	0	0	0	0	0	0	0	0	0	0	0	0	0	0.131129	0
1700003P14Rik	0	0	0	0	0	0	0	0	0	0	0	0	0	0	0	0	0	0	0	0	0	0	0	0
1700006A11Rik	0	0	0	0	0	0	0	0	0	0	0	0	0	0	0	0	0	0	0	0	0	0	0	0
1700006E09Rik	0	0	0	0	0	0	0	0	0	0	0	0	0	0	0	0	0	0	0	0	0	0	0	0
1700006F04Rik	0	0	0	0	0	0	0	0	0	0	0	0	0	0	0	0	0	0	0	0	0	0	0	0
1700006H21Rik	0	0	0	0	0	0	0	0	0	0	0	0	0	0	0	0	0	0	0	0	0	0	0	0
1700007B14Rik	0	0	0	0	0	0	0	0	0	0	0	0	0	0	0	0	0	0	0	0	0	0	0	0
1700007F19Rik	0	0	0	0	0	0	0	0	0	0	0	0	0	0	0	0	0	0	0	0	0	0	0	0
1700007G11Rik	0	0	0	0	0	0	0	0	0	0	0	0	0	0	0	0	0	0	0	0	0	0	0	0
1700007J10Rik	0	0	0	0	0	0	0	0	0	0	0	0	0	0	0	0	0	0	0	0	0.716029	0	0	0
1700007K09Rik	0.56977	0	0	0	0	0	0	0	0	0	0.653538	0.471306	0	0	0	0	0	0	0	0	0	0	0	0
1700007K13Rik	0	0	0	0	0	0	0	0	0	0	0	0	0.556625	0	0	0	0	0	0	0	0	0	0	0
1700007L15Rik	7.44182	8.85124	9.32611	10.8587	11.5206	0.740595	3.86976	2.43802	6.94019	7.71138	10.2438	6.21806	13.0713	1.80526	5.05179	0	10.2871	6.02527	8.42661	6.6872	8.1149	12.9783	5.13596	0
1700007P06Rik	0	0	0	0	0	0	0	0	0	0	0	0	0	0	0	0	0	0	0	0	0	0	0	0
1700008F21Rik	0	0	0	0	0	0	0	0	0	0	0	0	0	0	0	0	0	0	0	0	0	0	0	0
1700008I05Rik	0	0	0	0	0	0	0	0	0	0	0	0	0	0	0	0	0	0	0	0	0	0	0.147632	0
1700008J07Rik	3.10469	2.89274	2.93189	2.48506	3.55675	1.45055	3.2656	1.36609	3.24848	3.42899	2.19231	4.41934	3.22914	5.19559	2.45106	0	2.95595	3.02066	2.64907	4.00073	3.40278	1.53535	2.41039	1.60922
1700008K24Rik	0	0	0	0	0	0	0	0	0	0	0	0	0	0	0	0	0	0	0	0	0	0	0	0
1700008O03Rik	1.50943	0.71566	0.744959	0.348081	1.00491	0	0.996614	0	1.59521	0.737577	0.432909	1.60268	1.39091	0	1.5408	0	1.64189	1.68769	1.59989	0	0.46603	0.81817	0.654598	0
1700008P02Rik	0	0	0	0	0	0	0	0	0	0	0	0	0	0	0	0	0	0	0	0	0	0	0	0
1700009C05Rik	0	0	0	0	0.408558	0	0	0	0	0	0	0	0	0	0	0	0.396895	0	0	0	0	0	0	0
1700009J07Rik	0	0	0	0	0	0	0	0	0	0.738609	0	0	0	0	0	7.13517	0	0	0	0	0	4.91615	0	17.3103
1700009N14Rik	0	0	0	0	0	0	0	0	0	0	0	0	0	0	0	0	0	0	0	0	0	0	0	0
1700009P17Rik	0	0	1.26634	0	1.13678	0	0.85438	0	0.454009	0.314687	0.368368	0.274897	1.56265	0	0	0	0.841106	0	1.70039	0	1.57237	4.16626	0.837613	0
1700010B08Rik	0	0	0	0	0	0	0	0	0	0	0	0	0	0	0	0	0	0	0	0	0	0	0	0
1700010D01Rik	0	0	0	0	0	0	0	0	0	0	0	0	0	0	0	0	0	0	0	0	0	0	0	0
1700010I02Rik	0	0	0	0	0	0	0	0	0	0	0	0	0	0	0	0	0	0	0	0	0	0	0	0
1700010I14Rik	1.10821	3.66967	2.48963	0.59674	1.38967	0	3.87584	2.61869	2.48739	1.56453	0.544963	2.35827	2.06091	0	4.87045	0	2.65294	3.08142	3.01192	4.30637	1.13445	1.35943	3.60607	4.89327
1700010J16Rik	0	0	0	0	0	0	0	0	0	0	0	0	0	0	0	0	0	0	0	0	0	0	0	0
1700010K23Rik	0	0	0	0	0	0	0	0	0	0	0	0	0	0	0	0	0	0	0	0	0	0	0	0
1700011A15Rik	0	0	0	0	0	0	0	0	0	0	0	0	0	0	0	0	0	0	0	0	0	0	0	0
1700011B04Rik	0	0	0	0	0	0	0	0	0	0	0	0	0	0	0	0	0.521501	0	0	0	0	0	0	0
1700011E24Rik	0	0	0	0	0.368711	0	0	0	0	0	0	0	0	0	0	0	0	0	0	0	0	0	0	0
1700011H14Rik	0	0	0	0	0	0	0	0	0	0	0	0	0	0	0	0	0	0	0	0	0	0	0	0
1700011I03Rik	0	0	0	0	0	0	0	0	0	0	0	0	0	0	0	0	0	0	0	0	0	0	0	0
1700011L22Rik	0	0	0.3398	0	0	0	0	0	0	0	0	0	0	0	0	0	0	0	0	0	0	0	0	0
1700011M02Rik	0	0	0	0	0	0	0	0	0	0	0	0	0	0	0	0	0	0	0	0	0	0	0	0
1700012A03Rik	0	0	0	0	0	0	0	0	0	0	0	0	0	0	0	0	0	0	0	0	0	0	0	0
1700012B07Rik	0	0	0	0	0	0	0	0	0	0	0	0	0	0	0	0	0	0	0	0	0	0	0	0
1700012B09Rik	0	0	0	0	0	0	0	0	0	0	0	0	0	0	0	0	0	0	0	0	0	0	0	0
1700012D01Rik	4.39733	3.5971	0.544394	2.49366	2.46139	0	0	0	3.06568	4.26037	3.15246	0	4.87348	0	1.11816	0	2.36679	2.41382	3.50343	3.68118	2.78977	2.40239	0.473044	4.26721
1700012D14Rik	0.635377	1.17974	1.89099	1.14372	0.571535	0	0.81123	0	0	0.612959	0	0	0.817121	21.985	0.645115	0	0.544368	0.691339	0	0	0.817034	0	0	0
1700012I11Rik	0	0	0	0	0	0	0	0	0	0	0	0	0	0	0	0	0	0	0	0	0	0	0	0
1700012L04Rik	0	0	0	0	0	0	0	0	0	0	0	0	0	0	0	0	0	0	0	0	0	0	1.44681	0
1700012P22Rik	0	0	0	0	0	0	0	0	0	0	0	0	0	0	0	0	0	0	0	0	0	0	0	0
1700013D24Rik	0	0	0	0	0	0	0	0	0	0	0	0	0	0	0	0	0	0	0	0	0	0	0	0
1700013F07Rik	0	0	0	0	0	0	0	0	0	0	0	0	0	0	0	0	0	0	0	0	0	0	0	0
1700013G24Rik	0	0	0	0	0	0	0	0	0	0	0	0	0	0	0	0	0	0	0	0	0	0	0	0
1700013H16Rik	0	0	0	0	0	0	0	0	0	0	0	0	0	0	0	0	0	0	0	0	0	0	0	0
1700015E13Rik	0	0	0	0	0	0	0	0	0	0	0	0	0	0	0	0	0	0	0	0	0	0	0	0
1700015F17Rik	0	0	0	0	0	0	0	0	0	0	0	0	0	0	0	0	0	0	0	0	0	0	0	0
1700015G11Rik	0	0	0	0	0	0	0	0	0	0	0	0	0	0	0	0	0	0	0	0	0	0	0	0
1700016C15Rik	0	0	0	0	0	0	0	0	0	0	0	0	0	0	0	0	0	0	0	0	0	0	0	0
1700016D06Rik	0	0	0	0	0	0	0	0	0	0	0	0	0	0	0	0	0	0.28483	0	0	0.304395	0	0	0
1700016G22Rik	0	0	0	0	0	0	0	0	0	0	0	0	0	0	0	0	0	0	0	0	0	0	0	0
1700016H13Rik	0	0	0	0	0	0	0	0	0	0	0.527579	0	0	0	0	0	0	0	0	0	0	0	0	0
1700016K19Rik	0	0	0	0	0	0	0.494293	0	0	0	0	0	0	0	0	0	0	0	0	0	0	0	0.324572	0
1700016L04Rik	0	0.358325	0	0	0	0	0	0	0	0	0	0	0	0	0	0	0	0	0	0	0	0	0	0
1700016L21Rik	0	0	0	0	0	0	0	0	0	0	0	0	0	0	0	0	0	0	0	0	0	0	0	0
1700016P04Rik	0	0	0	0	0	0	0	0	0	0	0	0	0	0	0	0	0	0	0	0	0	0	0	0
1700017B05Rik	50.5341	59.9418	36.8056	38.0136	51.7202	53.5528	104.676	81.9995	52.2442	55.7736	43.5077	47.6355	50.1152	39.0221	85.5363	62.2497	57.994	55.3961	37.9483	37.5799	40.5713	40.5088	88.9109	98.3751
1700017D01Rik	0	0	0	0	0	0	0	0	0	0	0	0	0	0	0	0	0	0	0	0	0	0	0	0
1700017G19Rik	0	0	0	0	0	0	0	0	0	0	0	0	0	0	0	0	0	0	0	0	0	0	0	0
1700017J07Rik	0	0	0	0	0	0	0	0	0	0	0	0	0	0	0	0	0	0	0	0	0	0	0	0
1700017N19Rik	0	0	0	0	0	0	0	0	0	0	0	0	0	0	0	0	0	0	0	0	0	0	0	0
1700018A04Rik	0	0	0	0	0	0	0	0	0	0	0	0	0	0	0	0	0	0	0	0	0	0	0	0
1700018B08Rik	0	0	0	0	0	0	0	0	0	0	0	0	0	0	0	0	0	0	0	0	0	0	0	0
1700018B24Rik	0	0	0	0	0	0	0	0	0	0	0	0	0	0	0	0	0	0	0	0	0	0	0	0
1700018C11Rik	0	0	0	0	0	0	0	0	0	0	0	0	0	0	0	0	0	0	0	0	0	0	0	0
1700018F24Rik	0	0	0	0	0	0	0	0	0	0	0	0	0	0	0	0	0	0	0	0	0	0	0	0
1700018G05Rik	0	0	0	0	0	0	0	0	0	0	0	0	0	0	0	0	0	0	0	0	0	0	0	0
1700018L02Rik	0.790338	2.96541	2.03782	9.49527	1.1633	0	1.50371	0.532191	0.76627	0.850583	5.0211	5.40953	0.620057	0	0.270922	0.836259	0.230845	1.92533	2.52735	1.56323	0.959241	0	0.941107	0
1700019A02Rik	0	0	0.624266	0	0	0	0	0	0	0	0	0	0	0	0	0	0	0	0	0	0	0	0	0
1700019B03Rik	0	0	0.185131	0.353742	0	0	0	0	0.268382	0.185751	0	0	0	0	0.192924	0	0	0	0.398089	0	0.225843	0	0.164693	0
1700019B21Rik	0	0	0	0	0	0	0	0	0	0	0	0	0	0	0	0	0	0	0	0	0	0	0	0
1700019D03Rik	1.27978	1.20862	0	0.783275	0.379637	0	0	0	1.1986	1.66349	0.978748	0.359882	0.528672	0	0	0	0.370115	3.32132	1.35734	1.44942	0.530902	0	0	0
1700019E08Rik	0	0	0	0	0	0	0	0	0	0	0	0	0	0	0	0	0	0	0	0	0	0	0	0
1700019G17Rik	4.05551	4.49224	3.45061	2.63224	6.37876	7.87582	4.59258	1.83561	3.44955	3.85255	4.13988	5.79608	4.656	0	6.56013	0	3.88474	3.21064	4.45426	3.43738	6.2357	2.17798	4.38958	4.33384
1700019G24Rik	0	0	0	0	0	0	0	0	0	0	0	0	0	0	0	0	0	0	0	0	0	0	0	0
1700019L03Rik	1.98825	1.23028	0.891096	1.19428	1.11761	0	1.00318	2.78659	1.8195	1.44581	0.831589	1.92771	2.35585	0.332088	0.931255	0	1.27726	1.24402	1.93735	1.58297	1.54417	1.55155	0.315598	0
1700019M22Rik	0	0	0	0	0	0	0	0	0	0	0	0	0	0	0	0	0	0	0	0	0	0	0	0
1700019N19Rik	0	0	0	0	0	0	0	0	0	0	0	0	0	0	0	0	0	0	0	0	0	0	0	0
1700019O17Rik	0	0	0	0	0	0	0	0	0	0	0	0	0	0	0	0	0	0	0	0	0	0	0	0
1700020A23Rik	0	0.506839	0	0	0	0	0	0	0	1.05025	0	0	1.12921	0	0	0	0	0	0	0	0.686606	0	0	0
1700020D05Rik	0.329063	0.626581	1.29801	2.13468	0.582753	0	1.74936	4.97246	2.32531	0.967131	0.75504	0	0.400924	0	0	0	1.43598	0	0.697131	0	1.61343	0	2.00227	0
1700020G17Rik	0	0	0	0	0	0	0	0	0	0	0	0	0	0	0	0	0	0	0	0	0	0	0	0
1700020I14Rik	31.103	25.4979	44.86	31.1831	32.411	51.3877	36.5848	22.9685	34.1573	30.4795	40.064	31.5504	36.0964	47.084	52.0332	31.4783	29.8049	17.3895	39.815	34.321	42.1425	32.3802	41.8168	18.6607
1700020L24Rik	6.26336	5.59402	2.90885	10.5444	2.61518	0	7.79359	21.7701	3.11667	3.96252	3.38139	0.940037	6.32757	0	5.26624	14.2144	5.13259	7.42208	2.34281	8.8238	3.18064	18.3654	12.4678	5.87869
1700020M21Rik	0	0	0	0	0	0	0	0	0	0	0	0	0	0	0	0	0.528512	0	0	0	0	0	0	0
1700020N01Rik	0	0	0	0	0	0	0	0	0	0	0	0	0	0	0	0	0	0	0	0	0	0	0	0
1700020N15Rik	0	0	0	0	0	0	0	0	0	0	0	0	0	0	0	0	0	0	0	0	0	0	0	0
1700020N18Rik	0	0	0	0	0	0	0	0	0	0	0	0	0	0	0	0	0	0	0	0	1.04451	0	0	0
1700021F05Rik	30.4623	24.1161	32.3575	25.9443	25.3399	50.9063	16.7849	6.1631	30.9552	32.0183	34.9465	35.0061	32.7368	25.2295	24.0063	31.9922	25.8244	37.4759	33.9264	27.3187	30.5165	65.2356	20.728	25.3132
1700021F07Rik	0	0	0	0	0	0	0	0	0	0	0	0	0	0	0	0	0	0	0	0	0	0	0	0
1700021K19Rik	8.56496	7.53778	5.24405	7.56328	6.93385	27.3563	7.02115	3.05503	6.86662	7.99468	5.59926	6.51314	7.2422	1.31658	7.73575	9.34635	6.58999	6.43418	6.13631	6.3228	6.04072	7.31938	7.2661	7.39741
1700021N21Rik	0	0	0	0	0	0	0	0	0	0	0	0	0	0	0	0	0	0	0	0	0	0	0	0
1700022A21Rik	0	0	0	0	0	0	0	0	0	0	0	0	0	0	0	0	0	0	0	0	0	0	0	0
1700022A22Rik	0	0	0	0	0	0	0	0	0	0	0	0	0	0	0	0	0	0	0	0	0	0	0	0
1700022E09Rik	0	0	0	0	0	0	0	0	0	0	0	0	0	0	0	0	0	0	0	0	0	0	0	0
1700022H16Rik	0	0	0	0	0	0	0	0	0	0	0	0	0	0	0	0	0	0	0	0	0	0	0	0
1700022I11Rik	0	0	0	0	0	0	0	0	0	0	0.0865101	0	0	0	0	0	0	0	0	0	0	0	0.0662993	0
1700022P22Rik	0	0	0	0	1.12957	0	0	0	0	0	0	0	0	0	0	0	0	0	0	0	0	0	0	0
1700023C21Rik	0	0	0	0	0	0	0	0	0	0	0	0	0	0	0	0	1.21691	0	0	0	0	0	0	0
1700023E05Rik	0	0	0	0	0	0	0	0	0	0	0	0	0	0	0	0	0	0	0	0	0	0	0	0
1700023F02Rik	0	0	0	0	0	0	0	0	0	0	0	0	0	0	0	0	0	0	0	0	0	0	0	0
1700023F06Rik	0	0	0	0	0	0	0	0	0	0	0	0	0	0	0	0	0.233469	0	0	0	0	0	0	0
1700023L04Rik	0.594135	0	0	0	0	0	3.05544	0	0	0	0.681931	0.488799	0	0	0	0	1.0213	0	0.631172	0	0	0	0	0
1700024B18Rik	0	0	0	0	0	0	0	0	0	0	0	0	0	0	0	0	0	0	0	0	0	0	0	0
1700024F13Rik	0	0	0	0	0	0	0	0	0	0	0	0.957819	0	0	0	0	0	0	0	0	0	0	0.498257	0
1700024G13Rik	0	0	0	0	0	0	0	0	0	0	0	0	0	0	0	0	0	0	0	0	0	0	0	0
1700024P04Rik	0	0	0	0	0	0	0	0	0	0	0	0	0	0	0	0	0	0	0	0	0	0	0	0
1700024P16Rik	0	0.0894492	0	0	0	0	0	0	0	0	0	0	0	0	0	0	0	0	0	0	0	0	0	0
1700025B11Rik	0	0	0	0	0	0	0	0	0	0	0	0	0	0	0	0	0	0	0	0	0	0	0	0
1700025C18Rik	0	0	0	0	0	0	0	0	0	0	0	0	0	0	0	0	0	0	0	0	0	0	0	0
1700025F22Rik	0	0	0	0	0	0	0	0	0	0	0	0	0	0	0	0	0	0	0	0	0	0	0	0
1700025F24Rik	0	0	0	0	0	0	0	0	0	0	0	0	0	0	0	0	0	0	0	0	0	0	0	0
1700025G04Rik	0.27746	0.894188	1.74088	0.741625	0.435499	0	0.192119	0	0.279688	0.276038	0.636797	0.619459	0.353438	0.552837	0.28531	0.0223019	0.444053	0.0966848	0.702632	1.83102	0.292488	4.26337	0.611351	8.87282
1700025K24Rik	0	0	0	0	0	0	0	0	0	0	0	0	0	0	0	0	0	0	0	0	0	0	0	0
1700025M24Rik	0	0	0	0	0	0	0	0	0	0	0	0	0	0	0	0	0	0	0	0	0	0	0	0
1700025N23Rik	0	0	0	0	0	0	0	0	0	0	0	0	0	0	0	0	0	0	0	0	0	0	0	0
1700026D08Rik	0	0	0	0	0	0	0	0	0	0	0	0	0	0	0	0	0	0	0	0	0	0	0	0
1700026D11Rik	0	0	0	0	0	0	0	0	0	0	0.477832	0	0	0	0	0	0	0	0	0	0	0	0	0
1700026F02Rik	0	0	0	0	0	0	0	0	0	0	0	0	0	0	0	0	0	0	0	0	0	0	0	0
1700026L06Rik	0	0.536191	0	0	0	0	1.47906	0	0	0	0	0	0	0	0	0	0	0	0	0	0	0	0	0
1700027A15Rik	0	0	0	0	0	0	0	0	0	0	0	0	0	0	0	0	0	0	0	0	0	0	0	0
1700027F09Rik	0	0	0	0	0	0	0	0	0	0	0	0	0	0	0	0	0	0	1.01505	0	0	0	0	0
1700027H10Rik	0	0	0	0	0	0	0	0	0	0	0	0	0	0	0	0	0	0	0	0	0	0	0	0
1700027I24Rik	0	0	0	0	0	0	0	0	0	0	0	0	0	0	0	0	0	0	0	0	0	0	0	0
1700027J07Rik	0.312005	0.594946	0.615157	0	0.276031	0	0.415616	0	0.441419	0.917791	0.357955	0.802397	0.758045	0	0.318925	0	0.545185	0	0.660847	0	0.381443	0	0.814266	0
1700028B04Rik	0	0	0	0	0	0	0	0	0	0	0	0	0	0	0	0	0	0	0	0	0	0	0	0
1700028D13Rik	0	0	0	0	0	0	0	0	0	0	0	0	0	0	0	0	0	0	0	0	0	0	0	0
1700028E10Rik	0.688522	1.24146	1.12112	0.807657	1.50115	0	0.928736	0	0.611803	1.02091	0.819311	1.75362	1.94361	0	0.732454	8.50875	0.88141	1.16714	1.05502	1.50474	1.35989	1.51756	1.21724	0
1700028I16Rik	0.313854	0	0	0	0.277692	0	0	0	0	0	0	0	0	0	0	0	0.274177	0	0	0	0	0	0	0
1700028J19Rik	1.62672	0.778132	2.13648	0	1.91486	0	0.726287	0	1.53818	0.799181	1.5553	0.701294	0.981149	0	1.38685	0	0.712396	0.919871	0.286973	1.17319	1.97631	0	1.41777	0
1700028K03Rik	0.466165	0.534438	1.82278	1.82676	0.91723	0	0.755262	0	0.131533	1.06545	1.4476	0.73022	1.11575	0	0.941742	1.74857	0.674222	1.18324	2.22742	1.62267	1.42668	1.17766	1.25213	0
1700028M03Rik	0	0	0	0	0	0	0	0	0	0	0	0	0	0	0	0	0	0	0	0	0	0	0	0
1700028P14Rik	0	0	0	0	0	0	0	0	0	0	0	0	0	0	0	0	0	0	0	0	0	0	0	0
1700028P15Rik	0	0	0	0	0	0	0	0	0	0	0	0	0	0	0	0	0	0	0	0	0	0	0	0
1700029B22Rik	0	0	0	0	0	0	0	0	0	0	0	0	0	0	0	0	0	0	0	0	0	0	0	0
1700029F12Rik	0	0	0	0	0	0	0	0	0	0	0	0	0	0	0	0	0	0	0	0	0	0	0	0
1700029H14Rik	0	0	0	0	0	0	0	0	0	0	0	0	0	0	0	0	0	0	0	0	0	0	0	0
1700029I15Rik	0	0	0	0	0	0	0	0	2.25309	0	0	0	0	0	0	0	0	0	1.84615	0	2.50246	0	0	0
1700029J03Rik	0	0	0	0	0	0	0	0	0	0	0	0	0	0	0	0	0	0	0	0	0	0	0	0
1700029J07Rik	0.73221	0.913378	1.64322	1.28821	1.09881	0	2.0065	3.27112	1.19926	0.414621	0.48011	1.01608	2.33095	0	0.644322	3.1505	1.38842	0.722822	1.6572	2.77182	1.48709	0	1.10238	0
1700029M20Rik	0.101018	0.392248	0.0991779	0	1.23816	0	1.10815	0	0.434516	0	0	0	0.82909	0	1.34869	3.44616	0.268284	0	0.426866	1.518	1.19649	0	0.976327	0
1700029N11Rik	0	0	0	0	0	0	0	0	0	0	0	0	0	0	0	0	0	0	0	0	0	0	0	0
1700029P11Rik	0	0.311409	0	0	0	0	0	0	0	0.32042	0	0	0	0	0	0	0	0.367632	0	0	0	0	0	0
1700030A11Rik	0.783751	0	0.38692	0	0.348117	0	0	0	0.5517	0.382696	0	0	0.965395	0	0	0	0	0.437476	0.830877	3.67672	1.94022	0	0	0
1700030C10Rik	0	0	0	0	0	0	0	0	0	0	0	0	0	0	0	0	0	0	0	0	0	0	0	0
1700030F04Rik	0	0	0	0	0	0	0	0	0	0	0	0	0	0	0	0	0	0	0	0	0	0	0	0
1700030F18Rik	0	0	0	0	0	0	0	0	0	0	0	0	0	0	0	0	0	0	0	0	0	0	0	0
1700030J22Rik	0.287984	0.372816	0.282705	0	0.0839965	0	0.395055	0	0.275293	0.0951683	0.330456	0	0.112426	0	0.197138	0.609638	0.169981	0.110663	0	0.76394	0.113581	0	0.0843393	4.89424
1700030K09Rik	14.3164	12.4855	11.1311	10.8343	9.30188	5.43469	12.3983	7.32075	15.203	9.80523	10.4041	14.613	12.9047	17.5193	10.6525	15.0896	13.2899	11.386	13.1074	12.3071	11.8988	3.57924	9.42351	4.32868
1700030L20Rik	0	0	0	0	0	0	0	0	0	0	0	0	0	0	0	0	0	0	0	0	0	0	0	0
1700030M09Rik	0	0	0	0	0	0	0	0	0	0	0	0.300271	0	0	0	0	0	0	0	0	0	0	0	0
1700030N03Rik	0	0	0	0	0	0	0	0	0	0	0	0	0	0	0	0	0	0	0	0	0	0	0	0
1700030O20Rik	0	0	0	0	0	0	0	0	0	0	0	0	0	0	0	0	0	0	0	0	0	0	0	0
1700031A10Rik	0	0	0	0	0	0	0	0	0	0	0	0	0	0	0	0	0	0	0	0	0	0	0	0
1700031F05Rik	0	0	0	0	0	0	0	0	0	0	0	0	0	0	0	0	0	0	0	0	0	0	0	0
1700031M16Rik	0	0	0	0	0	0	0	0	0	0	0	0	0	0	0	0	0	0	0	0	0	0	0	0
1700031P21Rik	0	0	0	0	0	0	0	0	0	0	0	0	0	0	0	0	0	0	0	0	0	0	0	0
1700034E13Rik	0	0	0	0	0	0	0	0	0	0	0	0	0	0	0	0	0	0	0	0	0	0	0	0
1700034F02Rik	0.271656	0.131364	0.266888	0	0.119019	0	0	0	0	0.268781	0	0	0.320307	0	0	0	0.119886	0	0.287051	0.478162	0.161626	0	0.119048	0
1700034G24Rik	0	0	0	0	0	0	0	0	0	0	0	0	0	0	0	0	0	0	0	0	0	0	0	0
1700034H15Rik	0.39832	1.12576	1.01737	1.61346	0.91164	3.3015	0.845974	0	0.738115	1.68708	0.708527	2.16257	0.545612	8.55291	1.0365	0	0.98661	0.497145	0.684823	1.33795	1.6647	0.13635	0.607748	0
1700034I23Rik	0	0	0	0	0	0	0	0	0	0	0	0	0	0	0	0	0	0	0	0	0	0	0	0
1700034J05Rik	0	0	0	0	0	0	0	0	0	0	0	0	0	0	0	0	0	0	0	0	0	0	0	0
1700034K08Rik	0	0	0	0	0	0	0	0	0	0	0	0	0	0	0	0	0	0	0	0	0	0	0	0
1700034O15Rik	0	0	0	0	0	0	0	0	0	0	0	0	0	0	0	0	0	0	0	0	0	0	0	0
1700034P13Rik	0.880979	0	0.631339	0	0.905256	0	1.02306	0	2.76592	2.84988	0.849683	0.465649	0	0	0.604031	0	0.70035	1.12171	1.37044	0	0	0	1.12794	15.4433
1700036G14Rik	0	0	0	0	0	0	0	0	0	0	0	0	0	0	0	0	0	0	0	0	0	0	0	0
1700037C18Rik	3.89103	7.42748	4.71985	5.56367	6.61569	6.76175	1.99693	18.4753	7.20445	4.69875	5.49432	4.62678	6.16772	0	2.75427	17.4162	8.11284	9.44933	5.7047	8.26089	4.01731	0	4.16847	3.31835
1700037H04Rik	59.2902	51.6282	35.1327	35.692	36.9084	68.5535	35.8235	43.3921	52.1054	54.0091	31.5096	39.2512	36.1357	53.5809	38.0863	76.8193	47.0263	61.6356	32.5951	40.7215	29.8694	23.2449	46.3365	44.2683
1700039E15Rik	0	0	0	0	0	0	0	0	0	0.343453	0	0	0	0	0	0	0	0	0	0	0	0	0	0
1700039E22Rik	0	0	0	0	0	0	0	0	0	0	0	0	0	0	0	0	0	0	0	0	0	0	0	0
1700040L02Rik	1.79842	1.23041	1.265	2.15793	2.03989	0	1.7239	0	1.82361	2.02096	2.06337	2.21966	1.23666	5.13012	0.788753	0	2.25221	1.16403	2.44701	0	2.80308	11.6338	0.896249	0
1700041C23Rik	0	0	0	0	0	0	0	0	0	0	0	0	0	0	0	0	0	0	0	0	0	0	0	0
1700041M19Rik	0	0	0	0	0	0	0	0	0	0	0	0	0	0	0	0	0	0	0	0	0	0	0	0
1700042B14Rik	0	0	0	0	0	0	0	0	0	0	0	0	0	0	0	0	0	0	0	0	0	0	0	0
1700042G07Rik	0	0	0	0	0	0	0	0	0	0	0	0	0	0	0	0	0	0	0	0	0	0	0	0
1700042G15Rik	0	0	0	0	0	0	0	0	0	0	0	0	0	0	0	0	0	0	0	0	0	0	0	0
1700042O10Rik	0	0.29244	0.60441	0	0.542324	0	0.408696	0	0.867798	0.3007	0	0	0.744186	0	0	0	0.535895	0	0.324663	0	0.749014	0	0.266775	0
1700044C05Rik	0	0	0	0	0	0	0	0	0	0	0	0	0	0	0	0	0	0	0	0	0	0	0	0
1700044K03Rik	0	0	0	0	0	0	0	0	0	0	0	0	0	0	0	0	0	0	0	0	0	0	0	0
1700045H11Rik	0	0	0	0	0	0	0	0	0	0	0	0	0	0	0	0	0	0	0	0	0	0	0	0
1700046C09Rik	0	0	0	0	0	0	0	0	0	0	0	0	0	0	0	0	0	0	0	0	0	0	0	0
1700047A11Rik	0	0	0	0	0	0	0	0	0	0	0	0	0	0	0	0	0	0	0	0	0	0	0	0
1700047E10Rik	0	0	0	0	0	0	0	0	0	0	0	0	0	0	0	0	0	0	0	0	0	0	0	0
1700047G03Rik	0	0	0	0	0	0	0	0	0	0	0	0	0	0	0	0	0	0.469422	0	0	0	0	0	0
1700047I17Rik2	0	0	0	0	0	0	0	0	0	0	0	0	0	0	0	0	0	0	0	0	0	0	0	0
1700047L14Rik	0	0	0	0	0	0	0	0	0	0	0	0	0	0	0	0	0	0	0	0	0	0	0	0
1700047M11Rik	0	0	0	0	0	0	0	12.5446	0	0	0	0	0	0	0	0	0	0	0	0	0	0	0	0
1700048M11Rik	0.98081	1.77228	0	0	0	0	0	0	0	2.79134	3.37224	1.53767	0	0	2.96743	0	0	0	1.04684	0	5.30093	0	0	0
1700048O20Rik	2.10208	1.87351	2.70194	5.63592	2.5553	9.55721	3.95683	0	1.38546	2.23676	1.48429	3.54043	1.53175	0	3.15031	0	1.85357	2.22078	2.22186	1.98555	2.51178	0.347173	3.11602	0
1700049E15Rik	0	0	0	0	0	0	0	0	0	0	0	0	0	0	0	0	0	0	0	0	0	0	0	0
1700049E22Rik	0	0	0	0	0	0	0	0	0	0	0	0	0	0	0	0	0	0	0	0	0	0	0	0
1700049G17Rik	0.642427	0.626011	1.15524	1.63118	0.981618	0	0.590982	0	0.538783	0.95743	0.9215	0.666808	0.809379	1.74592	2.36587	0	0.522759	0.248025	1.18665	0.475889	1.07007	3.43153	1.83798	0
1700049L16Rik	0	0	0	0	0	0	0	0	0	0	0	0	0	0	0	0	0	0	0	0	0	0	0	0
1700051A21Rik	0	0	0	0	0	0	0	0	0	0	0	0	0	0	0	0	0	0	0	0	0	0	0	0
1700052I22Rik	0	0	0	0	0	0	0	0	0	0	0	0	0	0	0	0	0	0	0	0	0	0	0	0
1700052K11Rik	6.98569	7.70214	7.92553	11.62	9.39126	0	7.24537	17.5341	4.82829	7.27465	10.7799	9.65653	7.78992	11.1361	4.44994	7.80567	6.92087	6.78519	9.79732	4.4595	9.1539	4.90418	5.81351	3.86989
1700052N19Rik	29.0322	28.2367	31.6444	30.8117	33.4789	34.0172	28.8714	35.9771	27.8807	28.4841	30.8292	27.0102	35.3791	50.3284	26.5246	28.9476	28.6924	28.2331	33.9016	30.2827	34.0581	21.5645	24.4651	11.7332
1700054A03Rik	0	0	0	0	0	0	0	0	0	0	0	0	0	0	0	0	0	0	0	0	0	0	0	0
1700054K19Rik	0	0	0	0	0	0	0	0	0	0	0	0	0	0	0	0	0	0	0	0	0	0	0	0
1700054M17Rik	0	0	0	0	0	0	0	0	0	0	0	0	0	0	0	0	0	0	0	0	0	0	0	0
1700054O13Rik	0	0	0	0	0	0	0	0	0	0	0	0	0	0	0	0	0	0	0	0	0	0	0	0
1700055C04Rik	0	0	0	0	0	0	0	0	0	0	0	0	0	0	0	0	0	0	0	0	0	0	0	0
1700055N04Rik	0	0	0	0	0	0	0	0	0	0.437936	0	0	0	0	0	0	0	0	0	0	0	0	0	0
1700056E22Rik	1.75896	1.67149	0.347072	0.650604	0.623734	0	0.466132	0	0.992983	0.344249	0.40359	1.19957	0.860619	0	0.359296	0	0.919827	0	0.372752	3.01504	0.865475	0	0.305481	31.6545
1700057G04Rik	0	0	0	0	0	0	0	0	0	0	0	0	0	0	0	0	0	0	0	0	0	0	0	0
1700057H15Rik	0	0.32754	0	0	0	0	0	0	0	0	0	0	0	0	0	0	0	0	0	0	0	0	0	0
1700060C16Rik	0	0	0	0	0	0	0	0	0	0	0	0	0	0	0	0	0	0	0	0	0	0	0	0
1700060C20Rik	0	0	0	0	0	0	0	0	0	0	0	0	0	0	0	0	0	0	0	0	0	0	0	0
1700061F12Rik	0	0	0	0	0	0	0	0	0	0	0	0	0	0	0	0	0	0	0	0	0	0	0	0
1700061G19Rik	0	0	0.230796	0	0.102929	0	0.160714	0	0	0.116364	0.404493	0.621422	0.138111	0	0	0	0.103895	0.135138	0.124128	0	0	0	0.103135	0
1700061I17Rik	0	0	0	0	0	0	0	0	0	0	0	0	0	0	0	0	0	0	0	0	0	0	0	0
1700063A18Rik	0	0	0	0	0	0	0	0	0	0	0	0	0	0	0	0	0	0	0	0	0	0	0	0
1700063D05Rik	0	0	0	0	0	0	0	0	0	0	0	0	0	0	0	0	0	0	0	0	0	0	0	0
1700063O14Rik	0	0	0	0	0	0	0	0	0	0	0	0	0	0	0	0	0	0	0	0	0	0	0	0
1700064J06Rik	0	0	0	0	0	0	0	0	0	0	0	0	0	0	0	0	0	0	0	0	0	0	0	0
1700064M15Rik	0	0	0	0	0	0	0	0	0	0	0	0	0	0	0	0	0	0	0	0	0	0	0	0
1700065D16Rik	0	0.789128	1.86164	1.69533	1.57504	0	0	0	0	0	0.992519	0	1.1588	0	0	0	1.59355	0	0.923009	3.4947	0	0	0	0
1700065I16Rik	0	0	0	0	0	0	0	0	0	0	0	0	0	0	0	0	0	0	0	0	0	0	0	0
1700065I17Rik	0	0	0	0	0	0	0	0	0	0	0	0	0	0	0	0	0	0	0	0	0	0	0	0
1700065J11Rik	0	0	0	0	0	0	0	0	0	0	0	0	0	0	0	0	0	0	0	0	0	0	0	0
1700065J18Rik	0	0	0	0	0	0	0	0	0	0	0	0	0	0	0	0	0	0	0	0	0	0	0	0
1700065L07Rik	0	0	0	0	0	0	0	0	0	0	0	0	0	0	0	0	0	0	0	0	0	0	0	0
1700065O20Rik	0	0	0	0	0	0	0	0	0	0	0	0	0	0	0	0	0	0	0	0	0	0	0	0
1700066B17Rik	0	0	0	0	0	0	0	0	0	0	0	0	0	0	0	0	0	0	0	0	0	0	0	0
1700066B19Rik	1.9653	1.23264	3.4059	1.31279	3.13897	0	3.47951	0	1.49007	1.60294	2.25511	2.14044	2.85258	6.07773	2.61046	1.00593	1.7379	1.46281	2.80877	2.03951	1.64623	1.48617	2.23251	0.479655
1700066M21Rik	6.82503	4.97047	12.376	10.427	7.87922	15.7067	6.76295	3.46368	5.43729	6.29678	10.007	6.87387	10.3226	12.0268	12.3617	5.64499	4.70019	3.71589	9.61025	6.28735	10.3167	14.0007	9.49475	7.10281
1700066N21Rik	0	0	0	0	0	0	0	0	0	0	0	0	0	0	0	0	0	0	0	0	0	0	0	0
1700066O22Rik	0	0	0	0	0	0	0	0	0	0	0	0	0	0	0	0	0	0	0	0	0	0	0	0
1700067G17Rik	0	0	0	0	0	0	0	0	0	0	0	0	0	0	0	0	0	0	0	0	0	0	0	0
1700067K01Rik	0.605463	0.288855	0	2.25016	0.535399	0	0.403765	0	0	0.890932	0	1.29928	0	0	0	0	1.3232	0	0.641129	2.34896	0.739158	1.96243	0.7904	0
1700067P10Rik	0	0	0	0	0	0	0	0	0	0	0	0	0	0	0	0	0	0	0	0	0	0	0	0
1700069L16Rik	0	0	0	0	0	0	0	0	0	0	0	0	0	0	0	0	0	0	0	0	0	0	0	0
1700069P05Rik	0	0	0	0	0	0	0	0	0	0	0	0	0	0	0	0	0	0	0	0	0	0	0	0
1700071K01Rik	0	0	0	0	0	0	0	0	0	0	0	0	0	0	0	0	0	0	0	0	0	0	0	0
1700071M16Rik	0	0	0	0	0	0	0	0	0	0	0	0	0	0	0	0	0	0	0	0	0	0.495172	0	0
1700072B07Rik	0	0	0	0	0	0	0	0	0	0	0	0	0	0	0	0	0	0	0	0	0	0	0	0
1700072O05Rik	0	0	0	0	0	0	0	0	0	0	0	0	0	0	0	0	0	0	0	0	0	0	0	0
1700073E17Rik	0	0	0	0	0	0	0	0	0	0	0	0	0	0	0	0	0	0	0	0	0	0	0	0
1700074H08Rik	0	0	0	0	0	0	0	0	0	0	0	0	0	0	0	0	0	0	0	0	0	0	0	0
1700074P13Rik	0	0	0	0	0	0	0	0	0	0	0	0	0	0	0	0	0	0	0	0	0	0	0	0
1700080E11Rik	0	0	0	0	0	0	0	0	0	0	0	0	0	0	0	0	0	0	0	0	0	0	0	0
1700080N15Rik	0	0	0	0	0	0	0	0	0	0	0	0	0	0	0	0	0	0	0	0	0	0	0	0
1700080O16Rik	0	0	0	0	0	0	0	0	0	0	0	0	0	0	0	0	0	0	0	0	0	0	0	0
1700081H04Rik	0	0	0	0	0	0	0	0	0	0	0	0	0	0	0	0	0	0	0	0	0	0	0	0
1700084C01Rik	0	0	0	0	0	0	0	0	0	0	0	0	0	0	0	0	0	0	0	0	0	0	0	0
1700084E18Rik	1.20183	0	3.61349	0	3.32529	0	1.43339	0	0	0	0	4.58593	5.08837	0	1.20743	0	6.98091	3.71096	7.70948	0	3.3345	0	1.00649	0
1700084F23Rik	0	0	0	0	0	0	0	0	0	0	0	0	0	0	0	0	0	0	0	0	0	0	0	0
1700084J12Rik	0	0	0	0	0	0	0	0	0	0	0	0	0	0	0	0	0	0	0	0	0	0	0	0
1700085C21Rik	0	0.290479	0	0	0	0	0	0	0	0	0	0	0	0	0	0	0	0.343124	0	0	0	0	0	0
1700086L19Rik	0	0	0	0	0	0	0	0	0	0	0	0	0	0	0	0	0	0	0	0	0	0	0	0
1700086O06Rik	1.84622	1.19818	0.493484	1.79921	1.65708	0	1.05984	0	0	0.481641	1.55742	2.26314	2.1119	24.2285	1.02591	0	2.69827	0.852104	0.620954	2.22283	2.12446	0	0.655811	0
1700088E04Rik	0	0	0	0	0	0	0	1.44133	0	0	0	0	0	0	0	2.51498	0	0	0	0	0	0	0	0
1700091H14Rik	0	0	0	0	0	0	0	0	0	0	0	0	0	0	0	0	0	0	0	0	0	0	0	0
1700092C02Rik	0	0	0	0	0	0	0	0	0	0	0	0	0	0	0	0	0	0	0	0	0	0	0	0
1700092C10Rik	0	0	0	0	0	0	0	0	0	0	0	0	0	0	0	0	0	0	0	0	0	0	0	0
1700092E19Rik	0	0	0	0	0	0	0	0	0	0	0	0	0	0	0	0	0	0	0	0	0	0	0	0
1700092K14Rik	0	0	0	0	0	0	0	0	0	0	0	0	0	0	0	0	0	0	0	0	0	0	0	0
1700092M07Rik	3.14694	6.82091	0	1.30764	7.33752	42.5332	3.61118	0	0	4.3643	0	0	0	0	0	0	3.84684	6.27469	0	2.36366	2.26083	7.18549	0	0
1700093K21Rik	0.334456	0	0	1.54898	0.296232	0	0	0	0	0	0	1.14325	0	0	0	0	0	0	0	0	0	0	0	0
1700094D03Rik	3.39549	4.63498	4.14371	4.61356	4.0945	11.4409	3.77889	0	5.00169	3.54899	2.00079	5.19622	4.40352	1.49696	4.24077	2.33302	4.63247	3.49278	4.94249	5.92686	5.53431	7.26743	5.32246	0
1700094J05Rik	0	0	0	0	0.32093	0	0	0	0	0	0	0	0	0	0	0	0	0	0	0	0	0	0	0
1700094M24Rik	0	0	0	0	0	0	0	0	0	0	0	0	0	0	0	0	0	0	0	0	0	0	0	0
1700095A21Rik	0	0	0	0	0	0	0	0	0	0	0	0	0	0	0	0	0	0	0	0	0	0	0	0
1700095B10Rik	0	0	0	0	0	0	0	0	0	0	0	0	0	0	0	0	0	0	0	0	0	0	0	0
1700096J18Rik	0	0.98344	0	2.84381	0	0	2.65017	0	0	2.07208	0	2.54534	0	0	2.21025	0	0	0	1.17314	0	0	0	0.923227	0
1700096K18Rik	2.35919	2.47393	4.64259	2.2109	3.02079	0	4.05269	0	1.22107	1.47939	3.69117	1.11852	2.81853	8.95089	2.41644	0	2.82755	1.95243	3.62955	2.61658	4.13319	0	2.81113	2.40929
1700097N02Rik	43.4558	30.0119	42.1025	43.7677	46.832	0	30.7338	13.7088	41.6999	37.8995	41.2232	44.4691	39.2944	19.751	34.9458	37.2968	44.2514	31.1668	42.5393	38.7269	42.5826	9.98389	37.9836	3.3086
1700100L14Rik	0	0	0	0	0	0	0	0	0	0	0	0	0	0	0	0	0	0	0	0	0	0	0	0
1700101E01Rik	0	0.348217	0	0.677556	0	0	0	0	0	0	0	0	1.34991	0	0.749218	0	0	0	0	1.8833	0	0	0.318381	0
1700101I11Rik	0	0	0	0.818689	0	0	0	0	0	0	0.51248	0	0	0	0	0	0	0	0	0	0	0	0	0
1700101O22Rik	0	0	0	0	0	0	0	0	0	0	0	0	0	0	0	0	0	0	0	0	0	0	0	0
1700102H20Rik	0	1.22376	1.40286	0	0	0	0	0	0	1.29938	1.59626	0.609121	2.02256	0	0.764562	0	1.14659	1.41176	1.4935	0	0	0	4.64265	0
1700102P08Rik	0.895906	1.42522	0.294321	0.555148	0.528043	0	1.19556	0	0.845706	1.4651	0	0.256488	1.44779	0	2.74809	2.97272	0.52225	0.673479	0.63242	0	2.18609	2.58069	1.0398	0
1700104L18Rik	0	0	0	0	0	0	0	0	0	0	0	0	0	0	0	0	0	0	0	0	0	0	0	0
1700105P06Rik	0	0	0	0	0	0	0	0	0	0	0	0	0	0	0	0	0.660134	0	0	0	0	0	0.661953	0
1700106J16Rik	0	0	0	0	0	0	0	0	0	0	0	0	0	0	0	0	0	0	0	0	0	0	0	0
1700108F19Rik	0	0	0	0	0	0	0	0	0	0	0	0	0	0	0	0	0	0	0	0	0	0	0	0
1700108J01Rik	0	0	0	0	0	0	0	0	0	0	0	0	0	0	0	0	0	0	0	0	0	0	0	0
1700109G14Rik	0	0	0	0	0	0	0	0	0	0	0	0	0	0	0	0	0	0	0	0	0	0	0	0
1700109G15Rik	0	0	0	0	0	0	0	0	0	0	0	0	0	0	0	0	0	0	0	0	0	0	0	0
1700109H08Rik	0	0.515922	0	2.38123	0.468291	0	0	0	0	0	1.20118	0.43584	0.660111	0	0	0	0	0.576402	0.556015	12.2762	0.661633	0	0	0
1700109I08Rik	0	0	0	0	0	0	0	0	0	0	0	0	0	0	0	0	0	0	0	0	0	0	0	0
1700109K24Rik	0	0	0	0	0	0	0	0	0	0	0	0	0	0	0	0	0	0	0	0	0	0	0	0
1700110C19Rik	0	0	0	0	0	0	0	0	0	0	0	0	0	0	0	0	0	0.572127	0	0	0	0	0	0
1700110I01Rik	0	0	0	0	0	0	0	0	0	0	0	0	0	0	0	0	0	0	0	0	0	0	0	0
1700110K17Rik	0	0	0	0	0	0	0	0	0	0	0	0	0	0	0	0	0	0	0	0	0	0	0	0
1700110M21Rik	0	0	0	0	0	0	0	0	0	0	0	0	0	0	0	0	0	0	0	0	0	0	0	0
1700111N16Rik	0	0	0	0	0	0	0	0	0	0	0	0	0	0	0	0	0	0	0	0	0	0	0	0
1700112E06Rik	0	0.357337	0	1.39042	0.334484	0	0	0	0	0	0	0	0	0	0	3.41577	0	0	0	0	0	0.816986	0	0
1700112H15Rik	0	0	0	0	0	0	0	0	0	0	0	0	0	0	0	0	0	0	0	0	0	0	0	0
1700112J05Rik	0	0	0	0	0	0	0	0	0	0	0	0	0	0	0	0	0	0	0	0	0	0	0	0
1700113A16Rik	24.0504	21.8899	33.8912	37.837	30.4456	0.516418	24.6103	7.59813	17.9503	26.908	23.6501	29.6158	28.537	46.8148	12.9857	13.8347	29.6603	15.8074	24.3886	44.2132	24.9036	21.5697	19.6983	65.3478
1700113H08Rik	0	0	0	0	0	0	0	0	0	0	0	0	0	0	0	0	0	0	0	0	0	0	0	0
1700119H24Rik	0	0	0	0	0	0	0	0	0	0	0	0	0	0	0	0	0	0	0	0	0	0	0	0
1700120C14Rik	2.99113	3.90928	4.51839	0	4.17611	0	3.45878	0	5.93341	2.77406	3.42019	0	3.53079	0	1.49611	0	3.66947	1.50052	4.80514	7.92033	2.13495	0	2.48017	0
1700120E14Rik	0	0	0	0	0	0	0	0	0	0	0	0	0	0	0	0	0	0	0	0	0	0	0	0
1700120G07Rik	0	0	0	0	0	0	0	0	0	0	0	0	0	0	0	0	0	0	0	0	0	0	0	0
1700120K04Rik	4.02644	2.21256	0.801464	0.713456	0.730465	0	3.01909	0	1.10575	3.0816	1.8467	0	1.06687	0	0.814837	0	3.41532	2.5833	1.71606	0	0	0	0.685238	0
1700121L16Rik	0	0	0	0	0	0	0	0	0	0	0	0	0	0	0	0	0	0	0	0	0	0	0	0
1700121N20Rik	0	0	0	0	0	0	0	0	0	0.317719	0	0	0	0	0	0	0	0	0	0	0	0	0	0
1700122O11Rik	0	0	0	0	0	0	0	0	0	0	0	0	0	0	0	0	0	0	0	0	0	0	0	0
1700123I01Rik	0	0	0	0	0	0	0	0	0	0	0	0	0	0	0	0	0	0	0	0	0	0	0	0
1700123K08Rik	0	0	0	0	0	0	0	0	0	0	0	0	0	0	0	0	0	0	0	0	0	0	0	0
1700123L14Rik	0	0	0	0	0	0	0	0	0	0	0	0	0	0	0	0	0	0	0	0	0	0	0	0
1700123M08Rik	3.71343	2.36082	3.05047	4.3099	2.46363	0	3.71122	0	0.875755	1.8208	3.55028	2.91911	2.6303	0	3.16333	0	4.32648	3.13678	2.94939	2.66574	3.40357	0.66887	3.76927	0
1700123O12Rik	0	0	0	0	0	0	0	0	0	0	0	0	0	0	0	0	0	0	0	0	0	0	0	0
1700123O20Rik	37.2802	53.1584	37.9187	27.4528	34.9285	38.6445	47.9966	48.0134	33.6848	36.3723	43.1602	27.4475	29.7854	21.029	56.1299	19.6188	56.2134	46.0274	47.4123	29.4873	28.058	33.4038	48.72	20.5159
1700123O21Rik	0	0	0	0	0	0	0	0	0	0	0	0	0	0	0	0	0	0	0	0	0	0	0	0
1700124L16Rik	1.95272	1.6557	0	0	0	0	4.33087	0	0	0	4.4544	1.37841	0	0	0	0	1.56634	0	2.09546	0	0	0	0	0
1700125G02Rik	0	0	0	0	0	0	0	0	0	0	0	0	0	0	0	0	0	0	0	0	0	0	0	0
1700125G22Rik	0	0	0	0	0	0	0	0	0	0	0	0	0	0	0	0	0	0	0	0	0	0	0	0
1700125H03Rik	0	0	0	0	0	0	0	0	0	0	0	0	0	0	0	0	0	0	0	0	0	0	0	0
1700125H20Rik	0	0	0	0	0	0	0	0	0	0	0	0	0	0	0	0	0	0	0	0	0	0	0	0
1700126H18Rik	0	0	0	0	0	0	0	0	0	0	0	0	0	0	0	0	0	0	0	0	0	0	0	0
1700128A07Rik	0	0	0	0	0	0	0	0	0	0	0	0	0	0	0	0	0	0	0	0	0	0	0	0
1700128F08Rik	0	0	0	0	0	0	0	0	0	0	0	0	0	0	0	0	0	0	0	0	0	0	0	0
1700129C05Rik	0	0	0	0	0	0	0	0	0	0	0	0	0	0	0	0	0	0	0	0	0	0	0	0
1810006J02Rik	0.53871	1.90432	3.00161	2.70176	0.946767	0	0.243524	0	1.79302	1.77264	5.15097	1.25492	2.13271	0	0.920312	0	1.898	2.25629	5.12583	6.44332	1.72118	0	0.314325	0
1810007C17Rik	0	0	0	0	0	0	0	0	0	0	0	0	0	0	0	0	0	0	0	0	0	0	0	0
1810007D17Rik	0	0	0	0	0	0	0	0	0	0	0	0	0	0	0	0	0	0	0	0	0	0	0	0
1810008I18Rik	0	0	0	0	0	0	0	0	0	0	0	0	0	0	0	0	0	0	0	0	0	0	0	0
1810009A15Rik	60.1403	60.613	53.8316	32.2059	61.6209	53.3233	38.1849	58.3846	53.1544	50.8317	54.8455	54.1625	73.0322	29.4015	39.398	25.6753	63.0526	72.491	62.178	34.8492	60.1139	39.2961	31.7781	41.4892
1810009J06Rik	0	0	0	0	0	0	0	0	0	0	0	0	0	0	0	0	0	0	0	0	0	0	0	0
1810010D01Rik	0	0	0	0	0	0	0	0	0	0	0	0	0	0	0	0	0	0	0.388297	0	0	0	0	0
1810010H24Rik	0.59727	0.855132	2.06025	4.44119	0.528043	0	1.59408	0	1.26856	0.586039	3.08358	0.512976	1.08584	0	0	0	0.261125	0.673479	1.26484	0	1.09304	0	0.77985	0
1810011H11Rik	1.67773	10.8902	1.23797	2.94938	3.13766	0	8.49727	10.7555	5.67317	5.78776	2.40623	1.27687	6.25867	8.37151	12.8896	4.89359	8.66574	4.29779	5.32328	2.74291	5.80554	3.15873	12.4639	15.2174
1810011O10Rik	0	0.22751	0	0	0	0	0	0	0	0	0	0	0	0	0	0	0	0	0	0	0	0	0	0
1810012K16Rik	0	0.735429	0	0	0	0	1.00362	0	0	0	0.920561	0	0	0	0	0	0	0	0	0	0	0	0	0
1810013A23Rik	0	0	0	0	0	0	0	0	0	0	0	0	0	0	0	0	0	0	0	0	0	0	0	0
1810013L24Rik	12.8205	11.5428	15.2022	14.4703	12.4007	10.3302	10.8567	10.6364	14.4759	11.7752	14.161	11.9288	15.8261	21.2438	16.6234	12.3069	12.8903	9.43371	15.9957	17.8839	17.6928	13.4856	14.6556	6.80663
1810014B01Rik	10.3464	10.6925	15.54	9.72114	14.5531	16.5155	8.40896	16.6488	10.7278	12.2509	9.92879	7.54995	12.9771	5.11891	12.5312	8.37228	10.4332	5.79633	14.321	6.90736	18.5056	6.06562	8.22887	2.70068
1810018F18Rik	0	0	0	0	0	0	0	0	0	0	0	0	0	0	0	0	0	0	0	0	0	0	0	0
1810019D21Rik	0.227146	1.09058	0	0.637847	0	0	0	0	0	0.671099	0	0	0	0	0	0	0.199485	1.80697	0	0	0	0	0	0
1810019J16Rik	5.55411	7.0315	2.90088	3.42949	4.11672	0	2.82687	0	5.44882	13.8827	1.59316	3.49026	3.29487	0.314759	3.02479	0	3.05866	13.4906	3.1192	3.34422	3.11645	5.96564	3.95066	5.70856
1810020O05Rik	0	0	0	0	0	0	0	0	0	0	0	0	0	0	0	0	0	0	0	0	0	0	0	18.4515
1810021B22Rik	0.598076	0	0.592897	0	0.536962	0	0.767274	0	0	0	0.685984	0	0.764074	11.9784	1.21542	0	0.513553	0	0	0	0	0	0.513586	0
1810022K09Rik	26.3744	31.6698	53.029	26.9116	61.8287	129.346	9.73683	0	42.4488	24.5687	47.6438	52.8932	80.4115	0	5.5627	0	35.3742	28.1077	53.4885	59.4179	76.5365	75.5183	12.7047	45.6958
1810024B03Rik	0.251548	0.482097	0.495373	0	0	0	0.33782	0	0	0	0.288609	0	0	0	0.514905	0	0.220587	0	0.26619	0	0	0	0.658302	0
1810026B05Rik	4.08918	2.56883	5.97892	4.60417	5.46982	3.67309	3.08409	1.07177	3.75709	3.53095	5.5181	2.15948	5.41779	1.91048	6.43682	1.76091	2.10575	1.71882	4.85726	2.72508	7.76694	8.37381	8.21681	0.562408
1810026J23Rik	54.4564	51.5101	61.6275	62.203	52.4921	25.3308	44.7634	33.3154	55.1182	52.4066	62.5908	68.4865	51.9737	41.3945	40.7476	30.0401	54.2623	59.309	60.4379	54.5222	48.5961	28.7517	46.4419	20.8968
1810030O07Rik	25.208	24.3333	33.1149	27.6811	45.7204	51.0531	29.75	32.7794	27.6037	23.0838	35.7389	28.2651	51.7046	39.8072	41.6305	18.8004	28.5391	21.5308	30.7693	21.8502	49.0322	30.4808	36.7866	26.9761
1810032O08Rik	36.9323	40.5708	66.719	81.367	42.8945	57.0287	27.2315	78.2174	42.3328	41.95	63.4309	82.3283	33.9704	36.0158	19.9733	27.8046	40.879	49.7734	65.1591	83.988	35.8789	62.6514	24.0998	14.8522
1810033B17Rik	0.286674	2.19121	0.282467	3.2012	0.506584	0	0.383175	40.1081	0	1.40727	0	0	0	0	0	0.219972	0	0.32367	0	4.20976	0	0	0	9.26389
1810034E14Rik	0.333161	0.803867	0.163752	0	0.585134	0	0.678929	0	0.475619	0.329102	0.191137	0.14579	0.394822	0	1.19556	3.13364	0.440529	0.381101	0.176083	0.438057	0.398388	0	1.45881	0
1810037I17Rik	65.5313	75.1538	33.5198	32.3982	59.6153	52.6287	74.9358	96.8471	64.1237	66.8575	43.7557	34.9024	58.8998	30.8669	67.6444	42.125	70.4328	52.5081	47.0221	44.6015	72.4491	69.8159	69.2646	51.3442
1810041L15Rik	0	0.316679	0.500539	0.221048	0.769442	0	0	0	0	0.645621	0.212972	0.20661	0.0538955	0	0	0	0.28844	0.376473	0.881438	0.206404	0	0	0	0
1810043G02Rik	5.16203	6.35031	5.42554	4.68749	5.31771	10.2434	4.34607	10.0906	5.58652	5.09616	5.71869	4.35483	6.12918	9.04064	7.11594	5.70865	5.48799	4.27056	6.21004	6.07663	4.90399	7.64913	5.76461	9.50681
1810043H04Rik	29.1159	36.6043	20.6149	23.8415	26.5734	9.61486	24.2489	76.3366	17.9148	24.1043	23.6843	22.9428	29.2702	51.3576	31.2816	15.5296	30.0419	29.7308	27.056	36.8542	22.7183	8.35534	23.0461	1.72404
1810044D09Rik	8.73068	7.8944	7.74681	9.31486	7.09243	0	4.753	15.1689	3.95796	6.4451	10.0063	11.4216	6.60526	5.30478	6.84956	22.6158	9.78155	11.2255	8.28224	5.41948	9.1623	0	7.37782	7.09271
1810046K07Rik	0	0	0.470664	0.223494	0	0	0	0	0	0.235275	0.82285	0	0	0	0	0	0.419593	0	0.7588	0	0	0	0.208659	0
1810053B23Rik	0	0	0	0	0	0	0	0	0	0	0	0	0	0	1.03018	0	0	0	0	0	0	0	0	0
1810055G02Rik	12.9974	11.6344	10.7494	8.21484	8.62634	0	15.9526	19.6631	9.73496	9.08502	8.72985	11.6663	9.75446	7.18657	14.3037	16.5476	11.7427	12.7031	6.36612	16.5503	7.95089	9.52747	17.2186	26.4545
1810058I24Rik	77.8276	80.8673	54.0001	54.0707	73.1388	101.691	69.9016	107.915	71.5617	72.5156	58.0614	60.0602	60.3908	37.8165	64.8161	105.554	66.8472	79.2734	51.9056	58.9703	64.6843	79.6574	63.2264	124.21
1810062G17Rik	0.378978	0.359318	0.37409	1.39808	0	32.9856	0.500339	0	0.533965	0.370341	0.434767	0.321839	0.46576	0	0.386841	0	0.329756	0.423661	0.401698	0	0	0	0	0
1810062O18Rik	1.63392	0.459253	0.967062	0	1.30917	0	2.54419	0	0.684077	1.09254	0.5607	0.817657	2.06263	0	1.49339	0	0.844974	0.540082	1.55651	0.412136	0.770765	0	2.5309	0
1810064F22Rik	0	0	0	0	0	0	0	0	0	0	0	0	0	0	0	0	0	0	0	0	0	0	0	0
1810065E05Rik	0	0	0	0	0	0	0	0	0	0	0	0	0	0	0	0	0	0	0	0	0	0	0	0
2010001E11Rik	0	0	0	0	0	0	0	0	0	0	0	0	0	0	0.13104	0	0	0	0	0	0	0	0	0
2010002M12Rik	0	0	0	0	0	0	0	0	0	0	0	0	0	0.152232	0	0	0	0	0	0	0	0	0.147681	0
2010003K11Rik	0	0	0	0	0	0	0	0	0	0	0	0	0	0	0	0	0	0	0	0	0	0	0	0
2010005H15Rik	0	0	0	0	0	0	0	0	0	0	0	0	0	0	0	0	0	0	0	0	0	0	0	0
2010009K17Rik	0.738031	0	0	0	0	0	0	0	0	0	0.846357	0.597043	0	0	0	0	0	0	0	4.23152	0	0	0	0
2010010A06Rik	0	0	0	0	0	0	0	0	0.851868	0	0	0	0	0	0	0	0	0.66886	0	0	0	0	0	0
2010012O05Rik	9.56502	7.95277	10.5879	9.92511	10.8663	21.6685	8.82355	3.77406	8.28635	8.13095	10.2024	7.58069	12.2277	32.4879	12.1633	20.9214	9.5192	8.19609	8.68306	11.4998	12.9863	7.80014	10.161	18.2504
2010015L04Rik	0.118928	0.51417	0	0	0	0	0	0	0	0.117766	0	0	0	0	0	0	0.165961	0	0	0	0	0	0	0
2010016I18Rik	5.71078	16.0466	7.12407	10.1676	9.25838	0	15.9861	12.3457	9.26029	11.4595	5.50604	9.60976	9.99438	3.5728	25.2228	14.8917	13.1687	3.59082	6.35335	20.478	11.6929	5.50549	38.2324	22.788
2010106C02Rik	0	0	0	0	0	0	0	0	0	0	0	0	0	0	0	0	0	0	0	0	0	0	0	0
2010106E10Rik	0	0	0	0	0	0	0	0	0	0	0	0	0	0	0	0	0	0	0	0	0	0	0	0
2010107E04Rik	91.8366	99.4834	70.451	65.8166	132.043	199.831	84.8418	40.1733	66.8205	133.003	101.008	54.1051	212.305	99.2119	79.7617	83.3572	84.071	130.93	69.2788	70.7193	148.06	85.8445	50.4641	115.179
2010107G12Rik	0	0	0	0	0.119027	0	0	0	0	0.134312	0.155771	0.119341	0.16005	3.19995	0.139279	0	0	0.155815	0	0	0	0	0.119054	0.842185
2010107G23Rik	0	0.672278	0.856599	0.655784	1.07157	0	1.89188	0	0.248644	0.516188	0.799757	0.457011	0.827082	0	1.07179	0	0.307068	0.39832	1.84212	0	0.625829	0	1.06782	1.43263
2010109A12Rik	0	0	0	0	0	0	0	0	0	0	0	0	0	0	0	0	0	0	0	0	0	0	0	0
2010109I03Rik	0	0.763615	0.310831	0	0.1388	0	0.86029	0	0.225859	0	0.362875	0	0.187126	0	0	0	0.139463	0.181047	0.501386	1.80378	0	3.39448	0.138531	0
2010111I01Rik	16.249	19.9557	8.34863	8.81526	13.4517	3.6266	7.11096	10.4105	13.119	16.4369	11.0919	13.7308	17.8507	14.0041	6.59216	4.74331	17.5027	14.5823	9.89682	11.1307	13.962	17.3327	8.23288	13.9575
2010204K13Rik	70.1735	60.0038	43.9341	34.9839	72.8751	47.6161	29.6241	26.7612	73.6992	78.5179	47.0165	55.114	41.6663	0	31.9256	17.2431	66.9499	96.2688	50.3438	48.8042	57.9245	88.2825	34.2445	17.7381
2010300C02Rik	17.2696	17.3721	27.1328	34.5507	5.34427	0	19.5815	9.55969	12.6353	22.8446	22.8883	28.5316	7.86892	9.23749	8.97058	16.3343	21.6522	19.5372	24.9577	28.344	7.35385	4.08654	16.9896	19.0616
2010308F09Rik	0	0	0	0	0	0	0	0	0	0	0	0	0	0	0	0	0	0	0	0	0	0	0	0
2010310C07Rik	0	0	0	0	0	0	0	0	0	0	0	0	0	0	0	0	0	0	0	0	0	0	0	0
2010315B03Rik	0	0	0	0	0	0	0	0	0	0	0	0	0	0	0	0	0	0	0	0	0	0	0	0
2010320M18Rik	12.9721	21.5455	14.3158	10.9172	17.3811	0	16.8576	10.7835	15.3521	17.9308	22.8926	14.5852	8.76782	0	13.7161	0	21.118	14.8685	15.8898	10.0842	13.1886	16.3167	19.3663	0
2200002D01Rik	0.894918	0.813884	1.78426	0	0	0	0	0	0	0.852443	0	0	0	0	0	0	0.755181	0.948408	0	0	0	0	0	0
2200002J24Rik	0	0.615061	0	0	0.598189	0	0	0	0	0	0	0	0	0	0	0	0.56796	0	0.706408	0	0	0	0	0
2210010C04Rik	0	0	0	0	0	0	0	0	0.196069	0	0.157303	0	0.16166	0	0	0	0	0	0	0	0	0	0	0
2210011C24Rik	0	0	0	0	0	0	0	0	0	0.372432	0	0	0	0	0	0	0	0	0	0	0	0	0.330539	0
2210013O21Rik	13.5536	7.76773	3.65104	4.90927	4.7477	0	14.579	39.6498	9.2409	12.4221	8.95214	7.2923	8.6288	0	7.12232	31.7702	5.70693	4.57587	6.96829	6.99058	9.17771	3.56741	6.40247	13.0227
2210015D19Rik	8.27695	7.05115	7.01906	5.80919	7.97929	24.3493	9.70703	15.4265	9.50177	5.61228	6.51763	7.53266	7.11108	13.54	13.9787	9.166	7.15507	6.6864	8.40555	2.84671	7.75767	2.78784	7.67631	4.67903
2210016F16Rik	23.7361	22.937	23.5027	22.1088	26.3684	9.71155	23.6377	18.619	24.2818	24.0279	23.6283	23.3004	19.9764	8.64166	19.5792	16.974	22.4445	27.6972	22.2836	22.2291	22.7022	28.8871	18.2651	16.4507
2210016L21Rik	44.3449	55.5775	46.704	55.7261	40.7656	30.6052	43.3012	36.2785	44.0495	57.0193	48.4171	53.4894	37.1793	16.443	30.5096	23.8005	61.0975	61.9656	41.6209	34.3879	41.2138	29.2788	37.042	29.3509
2210018M11Rik	10.4024	8.23327	6.46404	6.32904	9.3929	0.211087	16.8051	16.0638	11.6538	9.84499	8.91279	8.12532	10.512	13.8232	15.1047	14.3277	10.8856	14.3524	9.00523	5.90635	9.39889	17.3484	15.4339	22.0294
2210019I11Rik	0	0	0	0	0	0	0	0	0	0	0	0	0	0	0	0	0	0	0	0	0	0	0	0
2210039B01Rik	0	0	0	0	0	0	0	0	0	0.627131	0	0	0	0	0	0	0	0	0.338841	0	0	0	0	0
2210404O07Rik	0.727895	8.04902	0.723391	0	0.657794	0	6.42945	0	4.01636	5.59205	1.66947	4.12626	0.951487	0	3.68831	23.8504	7.44267	5.49143	2.32473	14.3254	2.84783	0	4.97179	20.6458
2210404O09Rik	1.05363	2.1673	8.53905	3.85747	2.53993	0	5.57332	0	2.07272	2.34596	7.55616	2.31696	3.10338	0	9.18913	0	2.21063	1.36109	6.4011	4.28994	2.66332	2.82391	5.42957	4.49669
2210407C18Rik	0	0	0	0	0	0	0	0	0	0	0	0	0	0	0	0	0	0	0	0	0	0	0	0
2210408F21Rik	0	0.582999	0	0	0	0	0	0	0	0	0	0.556201	0	0	0	0	0	0	0	0	0	0	0	0
2210408I21Rik	1.03204	0.683966	1.57401	0.689278	1.42562	0	0.614683	0	0.491846	0.903814	0.937395	0.346757	0.839335	0	0.228974	0	0.754798	0.595989	1.74475	1.05664	1.02713	0	1.22249	0
2210409D07Rik	0	0	0	0	0	0	0	0	0	0	0	0	0	0	0	0	0	0	0	0	0	0	0	0
2210409E12Rik	0	0	0	0	0	0	0	0	0	0	1.84053	0	0	0	3.21779	0	1.31038	0	0	0	0	0	0	0
2210414B05Rik	0	0	0	0	0	0	0	0	0	0	0	0	0	0	0	0	0	0	0	0	0	0	0	0
2210416O15Rik	0	0	0.201606	0	0	0	0.276853	0	0	0	0.23504	0	0	0	0	0	0	0	0	0	0	0	0	0
2210417A02Rik	0.786187	0.721115	1.56435	0	0	0	5.90897	8.89684	0	0	1.80297	1.89543	0	0	4.77486	0	0.667605	0	4.18753	4.48298	1.03416	0	2.67815	0
2210420H20Rik	0	0	0	0	0	0	0	0	0	0	0	0	0	0	0	0	0	0	0	0	0	0	0	0
2300002M23Rik	0.255924	0.245151	0	0	0	0	0	0	0	0	0	0	0	0	0	0	0	1.15966	0	0	0	0	0	0
2300003K06Rik	0	0	0	0	0	0	0	0	0	0	0	0	0	0	0	0	0	0	0	0	0	0	0	0
2300005B03Rik	0	0	0	0	0	0	0	0	0	0	0	0	0	0	0	0	0	0	0	0	0	0	0	0
2300009A05Rik	20.6459	19.7219	34.1711	14.1759	18.6208	48.8832	24.4375	46.0571	18.0801	23.1762	40.2522	31.9348	18.7603	16.2963	24.4297	40.4571	22.3354	24.5762	28.56	37.9832	8.92146	0	25.3101	55.6237
2310001H17Rik	1.03897	3.3504	2.21293	1.32237	4.23127	0	2.69307	0	5.08672	2.01624	3.57562	4.77478	4.86241	2.70388	0.751543	0	4.03418	0.798316	3.86136	7.85566	3.28009	1.63553	4.47679	0
2310001K24Rik	1.0803	0	0	0	0	0	0	0	0	0	0	0	0	0	0	0	0	0	0	0	1.47791	0	0	0
2310002D06Rik	0	0	0	0	0	0	0	0	0	0	0	0	0	0	0	0	0	0	0	0	0	0	0	0
2310002F09Rik	0	0	0	0	0	0	0	0	0	0	0	0	0	0	0	0	0	0	0	0	0	0	0	0
2310002J15Rik	0.466413	0	0	0	0	0	0	0	0.653646	0	0	0	0	0	0	0	0	0	0	0	0	0	0	0
2310002L09Rik	0	0	0	0	0	0	0	0	0	0	0	0	0	0	0	0	0	0	0	0	0	0	0	0
2310003H01Rik	20.5993	19.6655	13.3918	17.1754	18.4084	25.6271	15.6729	21.2447	20.5953	24.4972	11.9722	16.1795	16.7955	23.7582	15.1105	16.3729	20.2202	27.5712	10.7351	16.0993	14.6512	17.9386	14.5771	25.2652
2310005A03Rik	0	0	0	0	0	0	0	0	0	0	0	0	0	0	0	0	0	0	0	0	0	0	0	0
2310005E17Rik	0	0	0	0	0	0	0	0	0	0	0	0	0	0	0	0	0	0	0	0	0	0	0	0
2310005G13Rik	0.185274	0	0	0.263588	0.0810445	0	0.127138	0	0	0	0	0	0	0	0	0.883007	0	0.213663	0	0	0	0	0	0
2310007B03Rik	0	0	0	0	0	0	0	0	0	0	0	0	0	0	0	0	0	0	0	0	0	0	0	0
2310007L24Rik	0	0	0	0	0	0	0	0	0	0.444603	0	0	0.569076	0	0	0	0	0	0	0	0	0	0	0
2310008N11Rik	0	0	0	0	0	0	0	0	0	0	0	0	0	0	0	0	0	0	0	0	0	0	0	0
2310009A05Rik	57.9066	61.9001	70.0967	37.3585	53.7401	4.16286	32.639	3.50233	55.5814	64.0341	46.7867	46.3185	65.7073	74.403	39.2743	38.5265	57.4989	52.0343	56.7228	31.1332	79.1963	42.2432	49.7783	12.1808
2310009B15Rik	16.9747	10.1931	13.2049	26.317	8.67471	0	18.6019	21.7209	12.2095	21.96	16.0806	20.2937	14.4967	0	8.97338	0	21.9969	18.2756	15.7158	4.83602	4.81976	1.62666	8.81786	23.6899
2310010J17Rik	7.86729	1.36413	1.58651	9.15341	1.46745	0	1.80555	0	6.21895	4.36425	3.59681	1.15244	11.661	0	3.14491	0	5.12907	4.70597	1.68572	0	6.78244	0	1.30154	1.33404
2310011J03Rik	56.2338	70.6155	47.7317	33.0597	56.9901	51.5831	56.6094	67.5349	55.1185	67.9759	48.5495	51.0173	54.2024	47.5155	38.1112	53.9667	61.4566	73.8297	48.803	42.7829	49.8451	54.3249	35.1031	25.9414
2310014L17Rik	1.48791	2.38114	3.0926	4.15278	1.53103	0	2.88493	5.67161	1.75794	1.47574	2.81212	3.02181	1.8425	0	1.70785	2.22679	1.55063	4.14067	3.04994	4.49347	1.24114	1.68561	2.92323	0
2310015A10Rik	0.857462	3.67529	1.85044	0.870555	0.798737	0	0.3942	1.32064	0.739503	0.965347	1.31194	1.01661	2.19515	7.14656	0.528705	0	2.08006	0.529459	2.17224	3.09828	2.08468	1.46588	1.05658	0
2310015B20Rik	0	0	0	0	0	0	0	0	0	0	0	0	0	0	0	0	0	0	0	0	0	0	0	0
2310015D24Rik	0	0	0.0960844	0	0	0	0	0	0	0	0	0	0	0	0	0	0	0	0	0	0	0	0	0
2310016D03Rik	0	0	0	0	0	0	0	0	0	0	0	0	0	0	0	0	0	0	0	0	0	0	0	0
2310020H05Rik	0	0	0	0	0	0	0	0	0	0	0	0	0	0	0	0	0	0	0	0	0	0	0	0
2310022A10Rik	40.4121	39.6167	27.4141	30.9648	35.8594	12.9054	37.3401	29.1982	41.0911	37.4552	32.535	30.968	29.3245	46.4746	28.1026	28.2218	40.7294	36.8927	32.9322	25.0322	30.2046	31.6452	32.063	19.855
2310022B05Rik	11.463	13.0517	15.7005	14.1277	13.6908	19.2542	16.6878	19.3183	11.4151	11.9644	16.0004	14.3929	14.302	10.2324	17.2202	14.22	11.5197	11.8476	14.8142	12.4972	13.2388	6.77243	15.4901	18.0991
2310030A07Rik	0	0	0	0	0	0	0	0	0	0	0	0	0	0	0	0	0	0	0	0	0	0	0	0
2310030G06Rik	0	0	0	0	0	0	0	0	0	0	0	0	0	0	0	0	0	0	0	0	0	0	0	0
2310033P09Rik	43.8477	50.1056	22.2206	37.8121	36.4197	61.91	29.2515	24.2874	44.0472	52.1925	28.5371	44.7534	31.4711	40.4958	29.39	65.869	47.4311	54.6065	33.6488	21.1197	36.6775	29.3041	25.7178	39.2841
2310034C09Rik	0	0	0	0	0	0	0	0	0	0	0	0	0	0	0	0	0	0	0	0	0	0	0	0
2310034G01Rik	1.84614	1.30385	0.456321	0	1.23442	0	0	0	0.647004	0.898288	0	1.16245	1.72654	0	0	0	1.19875	0.511436	0	0	0.577551	0	0.398785	0
2310034O05Rik	0	0	0	0	0	0	0	0	0	0	0	0	0	0	0	0	0	0	0	0	0	0	0	0
2310035C23Rik	6.89495	7.3719	9.23566	8.67361	7.32233	6.58344	7.6704	9.03171	7.02877	8.48738	6.8493	7.50988	7.65691	9.97499	7.50956	2.5531	5.84734	7.51088	7.87488	11.8496	6.47138	5.93612	8.33527	11.8088
2310036O22Rik	229.067	252.79	179.236	230.788	184.779	190.492	228.039	219.357	225.446	237.805	190.833	266.589	182.272	203.214	183.277	200.257	210.705	287.976	169.736	257.921	162.443	234.098	226.937	380.665
2310039H08Rik	36.4922	36.5578	29.9958	35.9492	44.393	0.708167	43.8708	45.7957	39.8321	33.6467	34.2499	37.7343	27.244	17.2414	26.0713	8.09835	38.9503	36.7133	35.2069	45.6344	20.7975	14.4492	33.9686	28.3731
2310039L15Rik	0	0	0	0	0	0	0	0	0	0	0	0	0	0	0	0	0	0	0	0	0	0	0	0
2310040G24Rik	1.41419	1.77423	1.86474	0.861828	2.13745	0	3.95823	0	4.34322	3.78464	1.71471	3.15903	1.1778	14.3246	1.5916	7.35782	1.3352	4.69662	2.00109	5.76384	1.1818	0	1.62848	0
2310042E22Rik	0	0	0	0	0	0	0	0	0	0	0	0	0	0	0	0	0	0	0	0	0	0	0	0
2310043L19Rik	0	0.50983	0	0	0	0	0	0	0	0	0	0	0	0	0	0	0	0	0	0	0	0	0	0
2310043O21Rik	0	0	0	0	0	0	0	0	0	0	0	0	0	0	0	0	0	0	0	0	0	0	0	0
2310045N01Rik	10.8421	10.0314	8.74637	17.0096	5.49762	10.0326	10.3263	0	6.56302	9.133	3.10864	8.2866	4.39001	6.17138	8.24911	0	11.5823	13.9479	9.37274	5.58894	10.5245	0	8.11784	1.29068
2310047M10Rik	9.00668	12.7169	7.37815	6.43864	8.20228	0	10.4231	22.5589	10.0005	10.3797	8.612	8.61221	6.12767	0	7.35338	12.8113	10.8799	11.4472	7.05223	9.50294	6.18299	10.0293	10.3705	29.6888
2310050C09Rik	0	0	0	0	0	0	0	0	0	0	0	0	0	0	0	0	0	0	0	0	0	0	0	0
2310057J18Rik	0	0	0	0	0	0	0	0	0	0	0	0	0	0	0	0	0	0	0	0	0	0	0	0
2310057M21Rik	12.5493	12.0193	11.4196	11.981	11.4641	25.6598	10.0975	11.5178	11.3393	11.7647	10.6103	9.7598	12.1402	11.2571	11.5207	19.0656	11.7861	11.0725	11.3053	6.51199	13.5144	16.428	10.428	6.5598
2310057N15Rik	0	0	0	0	0	0	0	0	0	0.319643	0	0	0	0	0	0	0	0	0	0	0	0	0	0
2310061I04Rik	35.4545	29.5299	18.722	22.7782	23.7987	24.8115	29.9958	5.23284	29.1777	40.1667	24.4657	31.0752	29.0615	6.06286	23.1367	22.3934	29.9544	34.921	18.2166	40.7598	19.3101	32.6856	22.4062	18.7664
2310061J03Rik	9.55131	8.71999	5.07031	7.71904	4.64774	15.7908	7.44721	12.7401	5.21165	6.68517	5.86382	8.60134	2.80267	0	3.28664	4.69448	7.16764	11.0824	4.62647	10.513	3.6394	0.731016	7.01985	13.1835
2310061N02Rik	0	0	0	0	0	0	0	0	0	0	0	0	0	0	0	0	0	0	0	0	0	0	0	0
2310065F04Rik	0	0	0	0	0	0	0	0	0	0.104393	0	0	0	0	0	0	0	0	0	0	0	0	0	0
2310067B10Rik	16.0126	13.2425	9.98529	16.292	11.7239	15.0003	11.0834	8.4971	11.7866	17.9309	10.987	14.4876	10.8175	13.2598	12.328	11.8824	15.9714	17.5873	10.3385	18.0459	11.9717	14.9323	12.2544	11.0075
2310068J16Rik	0.916762	0.602105	1.80243	0	1.09992	0	0.888989	2.66263	0.859731	0.917241	1.05284	0	0	0	0.611617	0	0	2.11328	1.31981	2.77322	1.11575	0	0.264681	0
2310069B03Rik	0	0	0	0	0	0	0	0	0	0	0	0	0	0	0	0	0	0	0	0	0	0	0	0
2310069G16Rik	0	0	0	0	0	0	0	0	0	0	0	0	0	0	0	0	0	0	0	0	0	0	0	0
2310079G19Rik	0	0	0	0	0	0	0	0	0	0	0	0	0	0	0	0	0	0	0	0	0	0	0	0
2310081J21Rik	0	0	0	0	0	0	0	0	0	0	0	0	0	0	0	0	0	0	0	0	0	0	0	0
2410002F23Rik	177.918	163.013	193.922	235.997	157.806	282.247	115.546	103.15	198.759	175.314	174.666	211.408	169.461	153.871	106.641	61.0749	186.664	160.588	191.341	216.781	169.975	216.697	118.226	72.593
2410003L11Rik	0	0	0	0	0	0	0	0	0	0	0	0	0	0	0	0	0	0	0	0	0	0	0	0
2410004B18Rik	20.8309	23.1029	16.782	15.0955	22.1548	56.8706	19.3328	37.322	23.0357	28.5445	24.6946	22.5075	30.976	17.6614	14.5394	13.4439	23.0033	18.3037	20.5992	27.0922	29.0197	21.7995	18.6954	6.59967
2410004I01Rik	0	0	0	0	0	0	0	0	0	0	0	0	0	0	0	0	0	0	0	0	0	0	0	0
2410004N09Rik	75.1329	60.4368	16.861	31.6902	76.4763	97.0245	36.0711	1.41306	59.1243	63.0562	24.7951	41.1725	42.5418	12.1756	19.9998	6.23876	94.8401	64.4242	17.8958	33.5663	45.9237	68.8733	5.50934	0
2410004P03Rik	0.171107	0.660621	0.168218	0	1.0526	0	0.232359	0	0.488603	0	0	0	0.202959	0	0.175425	0	0.754321	0.782896	0.361877	0	0.614524	0	0.449614	0
2410006H16Rik	20.0384	54.0118	15.8151	17.3631	58.0355	92.0489	20.465	22.0662	24.2674	30.9084	7.25039	26.2144	82.9754	78.8307	28.6795	0	36.1644	45.1199	27.0323	31.6943	93.4914	33.0045	32.8637	19.0597
2410007B07Rik	0	0	0	0	0	0	0	0	0	0	0	0	0	0	0	0	0	0	0	0	0	0	0	0
2410012E07Rik	0	0	0	0	0	0	0	0	0	0	0	0	0	0	0	0	0	0	0	0	0	0	0	0
2410012M07Rik	0	0	0	0	0	0	0	0	0	0	0	0	0	0	0	0	0	0	0	0	0	0	0	0
2410015M20Rik	35.5508	56.2887	31.3128	28.0044	43.0399	174.546	24.0865	38.8213	44.988	43.0717	30.1665	28.1124	39.0406	24.8068	22.8152	19.4947	40.835	43.0558	33.5996	31.2138	29.3695	23.3463	21.015	3.33918
2410016O06Rik	59.3811	76.1677	60.155	68.8306	56.1703	66.3844	45.1547	51.2544	63.4805	67.5165	70.2754	77.7769	43.8536	86.7122	38.5002	44.5446	72.7945	77.6646	62.7343	53.4186	40.4447	52.9882	38.3691	51.8586
2410017I17Rik	0	0	0	0	0	0	0	0	0	0	0	0	0	0	0	0	0	0	0	0	0	0	0	0
2410018L13Rik	0	0	0	0	0	0	0	0	0	0	0	0	0	0	0	0	0	0	0	0	0	0	0	0
2410018M08Rik	1.39396	1.01334	1.71119	1.42897	2.44197	7.40938	1.27128	3.62621	1.1645	1.61063	2.79916	0.716863	1.77457	2.31648	2.02688	0	2.1571	1.20255	2.57692	0.922142	0.827158	0.497792	1.83537	0
2410021H03Rik	0	0	0	0	0	0	0	0	0	0	0	0	0	0	0	0	0	0	0	0	0	0	0	0
2410076I21Rik	0	0	0	0	0	0	0	0	0	0	0	0.666252	0	0	0.401076	3.55284	0.341698	0	0	0	0	0	0.681314	14.8386
2410088K16Rik	0	0	0	0	0	0	0	0	0	0	0	0	0	0	0	0	0	0	0	0	0	0	0	0
2410089E03Rik	2.18405	2.08311	2.84639	2.89494	1.56823	0	2.49152	1.08463	2.33139	1.96856	2.38836	2.50192	1.87395	1.86166	2.51016	5.82636	2.46766	1.97026	2.49423	2.95669	1.80521	0.438646	3.10281	2.21712
2410114N07Rik	0.358459	0	0	0	0.317886	0	0	0	0	0.701308	0	0	0	0	0	0	0	0.401604	0	0	0	0	0	0
2410124H12Rik	0	0	0	0	0	0	0	0	0	0	0	0	0	0	0	0	0	0	0	0	0	0	0	0
2410127L17Rik	1.26323	0.543068	3.44764	0.529995	1.7233	0	2.1051	1.16405	0.802815	0.971846	2.0937	1.35638	1.32485	0	2.44781	3.42657	0.867503	0.644073	1.18653	0.617161	2.3405	1.8064	2.46132	0.290039
2410131K14Rik	11.52	12.0094	6.97711	7.64722	10.4631	0	12.2387	11.8906	13.4211	8.85382	7.78304	9.88335	11.8757	12.8808	9.17343	11.7697	12.4781	9.2966	8.75632	4.65806	11.8677	8.76258	12.3848	6.70896
2410137M14Rik	0	0	0	0	0	0	0	0	0	0	0	0	0	0	0	0	0	0	0	0	0	0	0	0
2410141K09Rik	0	0	0	0	0	0	0	0	0	0	0	0	0	0	0	0	0	0	0	0	0	0	0	0
2500004C02Rik	2.35782	2.88474	5.40716	2.96278	3.72517	0	3.635	0	2.46985	2.33021	3.96794	4.27044	4.09169	0	4.83587	6.78775	3.1888	2.15989	4.8179	3.03479	4.88011	1.01226	3.58057	0
2510002D24Rik	43.6276	43.2701	40.9188	37.0705	40.3271	0	33.4434	20.8839	53.0773	40.8495	41.1166	40.8174	40.6442	85.7979	34.5459	22.6239	47.1157	44.991	42.3242	43.8862	50.3914	37.5226	30.7972	19.4873
2510003E04Rik	23.5139	20.7488	13.9014	19.4812	17.4203	31.6224	20.482	21.178	23.1183	23.5181	18.256	18.1492	17.8736	19.7234	22.693	17.6705	19.3433	21.1241	17.5482	8.87296	19.7168	22.8105	21.8712	21.2305
2510009E07Rik	0.160477	2.55416	0.209874	0.254667	1.16765	0	0.147627	0.337234	0.230721	0	0.122767	0.428319	0.995346	0	0.27488	3.97987	0.71228	0.247826	0.338769	3.61385	1.32077	1.60008	0.565076	7.73326
2510039O18Rik	53.0964	65.9976	36.3378	49.5009	44.4566	49.3643	48.8331	48.1105	50.9284	51.8853	44.398	48.2769	43.4108	86.1455	44.5793	62.9124	50.7046	52.5508	40.3116	52.9329	45.9676	61.921	51.9855	80.6196
2510049J12Rik	0.113768	0.110294	0.335165	0	0.298915	0	0	0	0.162951	0.225373	0.130545	0.200664	0.133637	0	0.350327	0	0	0.261791	0.360529	1.10415	0.809812	0	0.0998732	0
2610001J05Rik	33.2952	27.9572	39.9303	32.9172	32.3082	20.9361	28.7237	29.5649	30.183	23.6806	39.5405	28.4117	36.1029	46.499	15.0205	22.1831	27.5893	32.564	41.7055	23.4946	36.8271	22.1655	19.39	19.1852
2610002J02Rik	19.9343	25.7338	18.4398	20.2578	21.9078	10.1163	27.8282	43.0282	20.7915	19.7667	12.6197	14.1761	18.9633	3.33693	18.1664	41.2151	31.5521	19.2652	17.1873	18.499	18.2966	20.339	18.2087	51.3871
2610002M06Rik	8.41432	4.39984	10.0963	6.04632	9.56002	10.3841	6.1028	6.18022	6.76108	7.33505	10.7345	5.60939	9.99343	8.34593	12.321	5.19581	4.63373	4.35876	10.9147	6.98391	10.988	7.43008	9.31348	2.66197
2610005L07Rik	9.27268	9.85571	11.0841	18.2064	6.62489	6.72305	8.47403	17.5379	9.89318	8.08977	11.2166	16.0471	8.42131	4.57426	8.48648	7.24515	12.4029	10.5287	10.9243	14.6281	8.93788	10.7194	6.5742	8.33478
2610008E11Rik	6.32461	5.13043	6.91604	4.8869	7.94316	2.20621	4.71915	0	7.19305	4.84073	6.50156	3.97848	9.28966	5.01386	7.10755	2.05088	6.07756	4.57208	10.0151	6.72443	9.62276	5.77446	6.89756	1.722
2610015P09Rik	3.22982	2.99145	3.16944	3.57953	2.28561	4.56284	3.06734	0	2.31838	3.4341	2.11784	1.77276	3.14225	0.278718	2.29084	1.47022	3.13562	3.37585	3.32893	2.0448	2.26827	2.3027	1.62295	3.04985
2610016A17Rik	0	0	0	0	0	0	0	0	0	0	0	0	0	0	0	0	0	0	0	0	0	0	0	0
2610018G03Rik	23.2488	20.3415	36.2923	34.9803	27.8829	31.2406	18.2397	24.9904	24.3967	28.2262	36.1313	26.603	39.4546	49.0968	25.9596	28.3554	23.2459	18.3857	33.1213	14.3512	48.2456	29.3616	19.3462	10.3269
2610020C07Rik	3.0034	4.10951	2.05405	4.36245	1.75318	0	2.43253	0.847973	1.64793	2.12494	2.0702	3.97177	2.68249	4.19964	1.84507	2.79169	3.28247	1.93134	3.24423	6.47315	3.07612	4.54033	2.92467	0
2610020H08Rik	2.94432	3.25919	2.37089	4.41824	3.05865	0	0.798714	0	1.88559	2.88554	2.72664	3.47358	4.06046	1.51926	2.04254	3.67609	5.53829	3.09839	3.35682	6.31113	3.77029	4.71947	2.88961	9.65165
2610027K06Rik	0	0	0	0	0	0	0	0	0	0	0	0	0	0	0	0	0	0	0	0	0.154325	0	0	0
2610028E06Rik	0	0	0	0	0	0	0	0	0	0	0	0	0	0	0	0	0	0	0	0	0	0	0	0
2610028H24Rik	0	0	0	0	0	0	0	0	0	0	0.247878	0	0	0	0	0	0	0	0	0	0	0	0	0
2610034B18Rik	0	1.03829	0	0	0	0	0	0	0	0	0	0	0	0	0	10.0441	0	0	0	7.67149	0	4.02597	0	4.16084
2610034M16Rik	0	0	0	0	0	0	0	0	0	0	0	0	0	0	0	0	0	0	0	0	0	0	0	0
2610035D17Rik	0	0	0.318265	0.305011	0.71068	0	0.66026	0	0	0	0.371526	0.141786	0.383417	0	0	0	0.142755	0.555861	0.171121	0.851968	0.193456	0	0.567236	0
2610035F20Rik	0	0	0	0	0	0	0	0	0	0	0	0	0	0	0	0	0	0	0	0	0	0	0	0
2610037D02Rik	0	0	0	0	0.202973	0	0	2.02546	0.111106	0	0	0	0.27109	0	0	0	0	0	0	0	0.0913209	0.827698	0	0
2610044O15Rik8	7.18159	6.92866	9.58178	8.52918	9.61214	7.51184	7.66131	17.4664	7.80921	7.5991	10.3984	3.88843	12.5728	0	10.518	10.8475	8.4386	4.69201	10.4838	5.99213	13.7084	2.93822	12.4261	2.1098
2610100L16Rik	0	0	0	0	0	0	0	0	0	0	0	0	0	0	0	0	0	0	0	0	0	0	0	0
2610203C20Rik	0	0	0	0	0	0	0	0	0	0	0	0	0	0	0	0	0	0	0	0	0	0	0	0
2610203C22Rik	0	0.245151	0	0	0	0	0	0	0	0	0	0	0	0	0	0	0	0	0.270835	0	0	0	0	0
2610206C17Rik	0	0.677992	0.172803	0	0.308827	0	0	0	0	0	0.403328	0	0	0	0.360336	0	0.309688	0	0.185805	0	0.210457	0	0.461555	0
2610207O16Rik	0	0	0	0	0	0	0	0	0	0	0	0	0	0	0	0	0	0	0	0	0	0	0	0
2610301B20Rik	9.85065	10.7376	12.9496	13.4922	11.5581	11.3662	9.27123	14.0988	11.5078	11.3914	14.1686	11.5819	15.5471	3.7736	12.6678	10.8199	13.3539	9.07387	14.3671	6.58983	12.3909	13.3909	9.97584	16.2025
2610305D13Rik	6.42135	2.51219	16.1514	4.58543	9.47117	4.10672	10.6388	2.11116	4.67967	3.90565	16.0292	5.26643	9.26135	6.12667	18.6174	3.29897	2.69024	1.42594	13.4469	6.36217	14.1643	13.5151	15.5275	4.09177
2610306M01Rik	17.4443	14.4625	9.87435	2.99549	13.154	20.4121	10.3124	14.6576	13.7017	13.2962	13.7127	12.9954	12.5817	13.4958	10.234	0	13.2561	16.712	10.2648	15.0025	13.4507	7.68542	10.3926	0
2610307P16Rik	0.599443	0	0.226466	0	1.21189	0	0.655736	0	1.15594	0.570993	0.275112	0.105601	1.76118	16.085	0.603553	0	0.203929	0.551375	0.487204	0	0.854179	0	0.420897	0
2610316D01Rik	0	0	0	0	0	0	0	0	0	0	0	0	0	0	0	0	0	0	0	0	0	0	0	0
2610318N02Rik	39.2692	39.5523	36.9414	53.4908	50.7343	121.192	57.7869	76.2405	41.5614	48.4669	35.0108	51.4805	54.4158	20.4305	39.4242	60.846	50.2327	50.4667	41.5542	50.5657	36.9541	73.3279	43.2045	61.9808
2610507B11Rik	36.6625	36.418	30.0884	32.3263	33.7322	39.8836	33.0675	28.9495	32.3105	37.2193	31.2819	33.9345	34.4871	26.0112	29.7871	36.1486	35.786	35.693	28.2668	29.3807	30.5172	28.9439	26.7772	38.0148
2610507I01Rik	0.39339	0.668285	0.579295	0.932264	0.774589	8.96871	1.07895	0	0.563997	0.487445	0.451407	1.13005	1.15227	0	1.0098	1.63882	1.39297	0	0.415465	0	1.39687	1.47387	0.950368	0
2610524H06Rik	105.309	89.3365	132.128	107.982	84.7395	99.4586	76.6181	50.4269	94.9385	76.4525	118.323	97.9635	89.1304	46.688	68.7323	46.5924	109.694	89.5706	132.691	76.8256	69.553	61.942	69.7307	54.1878
2610528A11Rik	0	0.457631	0	0	0	0	0.633856	0	0	0	0	0	0	11.5174	0.495984	0	0	0	0	0	0.611864	0	0	17.1729
2610528J11Rik	0	0	0	0	0	0	0	0	0	0	0	0	0	0	0	0	0	0	0	0	0	0	0	0
2700029M09Rik	29.8537	32.195	34.2189	28.8337	34.743	49.5207	37.0772	59.018	33.1043	30.3996	30.8264	31.8233	42.562	31.5346	37.7607	28.3979	29.4754	38.673	33.8977	23.2523	43.5253	55.0466	30.0399	34.6144
2700038G22Rik	31.8146	30.3156	44.138	34.995	40.5347	41.7684	44.7223	32.0628	27.758	28.3618	44.2528	41.4969	46.4977	33.3123	54.4782	28.9796	39.9819	24.2857	43.2625	39.5986	44.0394	35.5322	49.4983	1.4195
2700046A07Rik	0	1.86749	0	0	0	0	0	0	0	0	0	0	0	0	0	0	0.487016	0	0	0	0	0	0	0
2700046G09Rik	0	0	0	0	0	0	0	0	0.26448	0	0	0	0	0	0	0	0.326627	0	0	0	0	0	0	0
2700049A03Rik	4.51062	3.25963	3.41123	2.39747	4.38444	4.63269	3.78573	5.18912	4.87982	3.91288	4.00483	3.50602	3.60849	1.71621	4.7393	4.43026	3.56731	2.71374	3.14203	3.81316	4.15975	3.62122	4.2131	8.3616
2700054A10Rik	0	0	0	0	0	0	0	0	0	0	0	0	0	0	0	0	0	0	0	0	0	0	0	0
2700060E02Rik	91.4748	90.7511	93.7853	67.51	99.0789	39.6659	108.815	87.8667	85.9922	83.5772	97.9592	75.0324	86.0495	27.2925	78.3055	67.7491	107.988	102.366	98.2438	62.0851	75.5277	91.3885	87.0819	63.4273
2700062C07Rik	29.9698	30.6984	34.6345	24.2062	28.5249	10.6664	30.4364	17.2235	38.7289	26.5286	32.165	32.5508	42.7464	32.1939	29.3106	63.893	37.1411	27.1838	38.2284	23.0054	29.5949	24.3932	29.1417	24.9209
2700069I18Rik	0	0	0	0	0	0	0	0	0	0	0	0	0	0	0	0	0	0	0	0	0	0	0	0
2700070H01Rik	0	0	0	0	0	0	0	0	0	0	0	0	0	0	0	0	0	0	0	0	0	0	0	0
2700081O15Rik	6.7612	13.5524	1.41361	3.21815	5.46829	9.79008	7.64516	7.8585	7.64788	7.21223	0.890301	2.21805	5.93114	5.92404	5.80931	4.87528	14.5598	5.00548	1.98909	2.80727	7.62566	8.76286	6.78064	5.45549
2700086A05Rik	0	0	0	0	0	0	0	0	0	0	0	0	0	0	0	0	0	0	0	0	0	0	0	0
2700089E24Rik	24.0287	21.1501	27.8058	18.76	19.4048	29.9317	32.5745	32.9101	16.3412	19.3394	19.0439	22.498	23.5623	12.5363	27.5631	37.8993	23.6924	17.8456	18.8709	17.8938	27.921	17.5325	24.6338	18.4323
2700089I24Rik	0	0	0	0	0	0	0	0	0	0	0	0	0	0	0	0	0	0	0	0	0	0	0	0
2700094K13Rik	130.773	138.88	108.809	120.522	133.964	181.299	83.867	62.7877	122.228	98.8411	116.286	113.937	124.412	109.984	62.7418	47.8692	128.094	143.943	111.884	107.845	147.636	82.5006	70.5918	24.1783
2700097O09Rik	2.97571	4.13762	9.09686	2.46839	6.66692	0	5.79318	8.06437	2.92432	2.9215	4.6517	6.08813	5.99716	0	3.61898	0	3.10234	2.99466	6.58011	1.78179	5.58173	10.1945	3.33845	0
2700099C18Rik	2.72306	3.08487	4.38717	2.77489	5.45717	1.12112	5.65473	2.52461	3.51629	1.70469	2.84024	4.28318	4.75869	1.348	2.28044	0	2.60562	3.64889	6.02476	1.28914	4.19539	3.20142	3.2398	9.05429
2810001G20Rik	3.08031	5.83809	6.08189	4.61374	3.76116	0	4.57139	0	5.96533	3.76149	6.18406	5.22735	5.21081	25.8925	4.32276	0	4.01887	4.30157	6.12232	5.25895	2.38043	0	4.33998	0
2810002D19Rik	5.00939	4.2154	3.69628	2.54429	3.67373	0	1.12776	0	4.45791	3.08608	5.02919	2.54202	4.98242	0	8.12499	1.62377	5.13847	4.27793	3.53203	4.55045	5.27485	6.28731	5.65548	0
2810004N23Rik	58.8862	57.6346	45.7406	50.6892	55.4439	40.2302	57.4676	102.271	58.7266	64.2153	44.0069	53.2563	58.6022	59.3683	45.2836	39.8985	65.5921	71.5427	46.302	42.8029	53.353	48.0954	49.656	25.5309
2810006K23Rik	20.5793	16.0411	16.1909	16.542	23.1267	10.4256	20.8585	20.2606	16.3168	17.8287	14.3638	12.811	26.1462	31.7706	18.554	16.7737	20.1652	17.9763	22.8872	10.1678	20.3803	17.0208	18.031	7.34171
2810007J24Rik	0	0	0	0	0	0	0	0	0	0	0	0	0	0	0	0	0	0	0	0	0	0	0	0
2810008D09Rik	71.2024	86.7324	69.344	139.847	68.5288	148.956	75.5725	70.7278	83.3243	80.3823	83.2296	128.255	92.37	94.7769	45.8326	30.4491	81.2953	43.7281	91.0616	142.746	92.2538	129.46	63.8367	51.4567
2810013P06Rik	11.2426	12.4224	16.6427	14.602	11.2714	11.7361	14.1234	13.3083	11.4789	11.8393	19.434	18.1995	10.5185	7.94304	11.2325	5.51359	13.016	8.87194	17.8984	20.7863	13.2282	12.8438	15.3583	4.52165
2810021J22Rik	5.20406	5.78615	6.49191	7.05349	6.42162	0	6.00764	5.94065	4.71599	5.05733	6.62086	5.08058	5.72607	3.99706	7.73141	5.29164	7.53061	4.19162	6.86641	11.3093	7.1861	5.80201	8.66315	2.72452
2810025M15Rik	0	13.4205	0.265693	0	0	0	0.361362	0	0	0.530111	0.309476	0	0.325307	0	0.275965	0	14.6491	0.305108	0.285507	10.0398	0	0	0.235107	7.37394
2810029C07Rik	0.608525	1.02905	1.04654	1.291	0.800979	0	0.828353	4.88015	1.52164	0.300777	0.523679	0.800531	2.33805	8.00072	1.71629	0	1.47648	0.174298	1.28624	0	0.363041	0	0.799891	0.15689
2810032G03Rik	0	0	0	0	0	0	0	0	0	0	0	0	0	0	0	0	0	0	0	0	0	0	0	0
2810047C21Rik1	0	0	0	0	0	0	0	0	0	0	0	0	0	0	0	0	0	0	0	0	0	0	0	0
2810049E08Rik	0	0	0	0	0	0	0	0	0	0	0	0	0	0	0	0	0	0	0	0	0	0	0	0
2810055G20Rik	0	0	0	0	0	0	0	0	0	0	0	0	0	0	0	0	0	0	0	0	0	0	0	0
2810403A07Rik	38.7145	31.0674	45.1586	60.5883	37.0205	21.0084	35.9749	22.0375	36.2423	38.1962	39.102	43.0267	47.1046	25.9063	42.3782	30.6656	33.8603	26.3018	40.4852	57.0085	45.798	56.3277	45.4101	18.8156
2810403D21Rik	2.66562	0	5.5864	0.617334	0.295105	0	0	0	1.41238	0.652729	4.58722	1.42393	2.84381	0	0.680884	0	0	0.374322	2.11782	2.86212	3.67824	5.76787	0.579166	0
2810404M03Rik	0	0	0	0	0	0	0	0	0	0	0	0	0	0	0	0	0	0	0	0	0	0	0	0
2810405F15Rik	0	0	0	0	0	0	0	0	0	0	0	0	0	0	0	0	0	0	0	0	0	0	0	0
2810408A11Rik	7.75833	7.13126	8.16089	11.3666	4.59806	25.4082	5.38246	0.743582	4.37502	4.98686	3.93341	5.98857	7.28683	5.23659	7.95228	4.79643	8.42237	5.77014	6.1041	3.78929	5.40503	6.97879	4.73717	0
2810408I11Rik	36.0312	28.2816	62.4257	49.131	40.2956	57.6539	48.0065	31.6114	28.1089	29.8048	45.5847	35.6962	36.1142	22.1794	44.7508	32.7571	18.7311	36.7249	42.7679	37.7918	34.1821	26.6084	43.8159	35.0681
2810408M09Rik	39.0491	38.945	26.2691	20.6571	37.3705	32.5027	23.0672	13.7286	38.6269	33.0513	21.852	29.0205	35.2374	22.9295	20.6776	18.4613	39.6581	37.7386	29.6017	17.1284	32.3096	21.9892	19.4868	1.81322
2810410L24Rik	0.354335	1.53755	1.04517	0.666561	0.311328	0	2.88414	4.38309	0	0.349828	1.2197	1.5482	0.210332	0	1.81609	0	0.780368	0.202426	1.3111	2.01626	0.212192	0.380651	1.70584	0
2810417H13Rik	133.401	66.6248	197.608	93.5858	140.661	156.71	92.8395	85.2897	117.443	99.4202	164.664	88.669	143.735	161.969	157.765	51.9347	83.599	81.0122	167.546	82.2868	169.869	172.427	130.523	30.1449
2810428I15Rik	35.5633	44.1744	19.3884	22.4957	32.9846	22.9055	42.6121	30.4457	37.9177	42.4039	29.9133	36.6575	31.7736	31.2958	37.9471	12.9499	46.3298	49.8804	18.8995	55.2941	28.0148	36.3392	30.5467	45.151
2810429I04Rik	0	0	0	0	0	0	1.78792	0	0	0	0.810283	0.573798	0	0	0	5.05025	0	0	0.751997	0	0.918485	0	0.603814	0
2810433D01Rik	0	0	0	0	0	0	0	0	0	0	0	0	0	0	0	0	0	0	0	0	0	0	0	0
2810442I21Rik	0.741161	0.714206	3.46291	3.51501	1.14021	0	2.51144	8.10129	1.58555	0.914343	1.70115	2.91182	2.42364	20.0224	1.51948	0	1.38715	0.634522	2.15547	0.516271	4.66739	13.1464	2.59463	0
2810442N19Rik	0	0	0	0	0	0	0	0	0	0	0	0	0	0	0	0	0	0	0	0	0	0	0	0
2810454H06Rik	0.608618	0.787536	0.7967	1.1535	0.443913	5.39531	0	0	0.726999	0.40214	1.51315	1.43387	0.832348	0	0.833157	0	0.359112	0.584329	1.07133	1.8823	0.600586	0	0.44549	0
2810459M11Rik	7.05293	4.2107	2.41802	1.0483	5.87214	3.48846	3.26812	0.710624	9.87714	6.49187	3.70444	1.95614	8.54458	0	5.67216	8.11142	4.51606	7.15975	4.84417	2.8585	5.11805	2.5448	6.34882	13.199
2810468N07Rik	0	2.23779	0	0.21811	1.02726	12.3277	4.39478	3.33635	1.32597	0.918176	1.33761	0.808512	0.83835	0	0.716192	0	1.22819	1.32394	0	0	1.97148	4.0179	2.23927	0
2810471M01Rik	0	0	0	0	0	0	0	0	0	0	0	0	0	0	0	0	0	0	0	0	0	0	0	0
2810474O19Rik	17.5592	12.9301	25.6087	19.7518	24.2912	35.6481	20.5689	19.4735	18.6833	13.5848	26.7452	17.858	24.6501	20.7429	24.9342	13.2709	11.6562	13.0111	32.8131	22.4306	22.374	14.9818	26.4233	7.40551
2900005J15Rik	5.82428	3.94185	5.57997	9.47932	4.47052	11.2624	4.36446	0	5.20349	5.90347	4.00978	5.62409	4.12677	4.22463	1.19485	1.83294	6.68307	3.33884	5.84712	10.3651	5.90124	8.43471	2.55272	0
2900008C10Rik	1.84422	3.31947	2.49585	0.647092	1.4217	0	2.48377	11.0783	1.31118	1.13489	1.32248	1.1995	2.20931	0	3.30459	0	3.03622	3.14239	1.70716	2.00496	1.94839	1.98598	4.42886	0
2900009J06Rik	0	0.947575	0	0	0.967258	0	0	0	1.42749	0	0	0	0	0	0	0	0.882059	0	0	0	0	0	0	0
2900011O08Rik	0	0	0	0	0	0	0	0	0	0	0	0	0	0	0	0	0	0	0	0	0	0	0	0
2900026A02Rik	0.0940648	2.75136	0	0	0.246312	0	0	0	0.0676467	0.18698	0	0.0837665	0.437106	3.32311	0.0483434	0.263695	0.250605	0.16354	0	0.376578	0.110492	1.0046	0	1.38101
2900041M22Rik	0.70259	2.24749	1.84419	1.53337	1.4446	0	0.630514	0	0	0.230547	3.76188	3.85685	2.24588	10.626	0.719343	0	1.64472	1.32964	3.7166	2.03597	1.41465	2.52241	0.81784	0
2900052N01Rik	0	0.540887	0	0	0	0	0	0	0	0	0	0	0	0	0	0	0	0	0	0	0	0	0	0
2900055J20Rik	0	0	0	0	0	0	0	0	0	0	0	0	0	0	0	0	0	0	0	0	0	0	0	0
2900056M20Rik	3.04409	2.64102	4.73958	4.59398	2.7174	0	2.46116	5.0659	1.52102	3.0225	4.55629	1.99802	4.04276	5.63591	7.20738	1.05632	2.28921	1.30112	4.19165	5.16852	6.47021	7.92256	8.46592	4.56622
2900057B20Rik	0	0	0	0	0	0	0	0	0	0	0	0	0	0	0	0	0	0	0	0	0	0	0	0
2900060B14Rik	2.07537	1.27866	0.687037	0	1.2481	0	0	2.64423	0.956346	0	0.793377	0	1.79716	0	0	0	0.590716	0.748344	0	0	2.69252	0	2.36635	0
2900076A07Rik	3.70218	3.88969	3.25045	8.32039	4.75523	10.4788	2.70379	0	6.36273	4.81587	5.66276	4.86865	10.1684	15.704	4.61566	0	6.78724	2.29133	5.23438	7.70099	9.19288	0.893264	4.63105	0
2900079G21Rik	0	0.313669	0	0	0	0	0	0	0	0.968316	0	0	0	0	0	0	0	0	0	0	0	0	0	0
2900092C05Rik	0	0	0	0	0	0	0	0	0	0.402547	0	0	0	0	0	0	0	0	0	0	0	0	0	0
2900092D14Rik	0	0	0	0	0	0	0	0	0	0	0	0	0	0	0	0	0	0	0	0	0	0	0	0
2900097C17Rik	53.8355	43.6696	73.2461	67.1126	52.1756	16.5508	45.4403	41.5779	50.9974	47.551	73.4736	64.0523	52.4162	71.1155	47.2811	63.3091	52.2298	42.0562	75.1336	61.9504	49.8113	56.557	51.2517	50.9471
3000002C10Rik	11.7005	14.5551	7.35339	11.3931	10.7572	20.6684	9.69888	2.79215	12.0218	11.5095	9.71127	7.75166	11.6675	0	7.13452	0	16.8123	11.289	10.5371	23.7634	15.3727	21.4645	11.2939	3.28733
3010001F23Rik	0	0	0	0	0	0	0	0	0	0	0	0	0	0	0	0	0	0	0	0	0	0	0	0
3010026O09Rik	13.358	11.679	6.72069	8.20074	7.78365	3.42671	10.2603	28.2485	10.0698	11.1629	10.4345	10.2732	8.59036	4.12846	12.2088	7.85438	13.1829	19.5796	8.12384	5.64834	9.34162	2.45445	12.6255	18.9499
3010033K07Rik	0	0	0	0	0	0	0	0	0	0	0	0	0	0	0	0	0	0	0	0	0	0	0	0
3100003L05Rik	0	0	0	0	0	0	0	0	0	0	0	0	0	0	0	0	0	0	0	0	0	0	0	0
3110001I22Rik	10.4204	9.12521	10.807	7.65352	9.99424	28.3903	11.0335	25.5365	10.2634	8.78594	8.69548	8.26358	12.3967	0	13.0088	0	12.6751	8.21495	10.8178	17.5547	9.09354	4.48022	13.7568	0
3110002H16Rik	3.56065	5.83024	3.02145	2.3278	3.71467	0.831124	6.5383	5.25564	4.89669	4.67648	3.86429	3.14695	4.20307	1.98654	3.37199	6.25902	2.78167	4.24342	2.74939	1.80724	4.40187	6.7552	6.00468	8.63586
3110007F17Rik	0	0	0	0	0	0	0	0	0	0	0	0	0	0	0	0	0	0	0	0	0	0	0	0
3110009E18Rik	3.69164	4.93594	0.920488	8.09017	3.36684	0	2.27376	0	2.51717	6.1455	2.11582	3.6184	4.98865	0	0	1.27485	3.11025	3.90149	0.984509	0	6.18751	0	0.781413	0
3110009F21Rik	0	0	0	0	0	0	0	0	0	0	0	0	0	0	0	0	0	0	0	0	0	0	0	0
3110015C05Rik	0	0	0	0	0	0	0	0	0	0	0	0	0	0	0	0	0	0	0	0	0	0	0	0
3110021A11Rik	0.434289	0.819757	1.28746	0.796816	1.15992	0	0	0	1.21965	0.423209	0.498198	1.46393	0	0	0	0	0.753232	0.965276	0.921311	0	0.541132	0	0	0
3110021N24Rik	0	0	0	0	0	0	0	0	0	0	0	0	0	0	0	0	0	0	0	0	0	0	0	0
3110035E14Rik	0	0	0	0	0	0	0	0	0	0	0	0	0	0	0	0	0	0	0	0	0	0	0	0
3110039I08Rik	0	0	0	0	0	0	0	0	0	0	0	0	0	0	0	0	0	0	0	0	0	0	0	0
3110039M20Rik	0	0	0	0	0	0	0	0	0	0	0	0	0	0	0	0	0	0	0	0	0	0	0	0
3110040N11Rik	6.55113	6.58285	6.87491	4.51818	6.18893	36.2021	4.30708	0.815146	4.0307	8.38949	5.63651	9.34848	7.58841	29.7731	9.60654	2.76805	7.11215	9.12468	3.47331	3.13651	11.6885	17.7809	5.3192	8.92713
3110043O21Rik	3.62684	3.09395	4.16761	2.43413	3.86868	0	1.57917	1.1093	2.79183	2.1933	4.77079	4.54139	2.69026	0	1.90777	2.10957	2.50738	3.16389	7.19269	6.88974	4.91376	3.2181	1.63267	6.35854
3110045C21Rik	0.286985	1.37095	0.282775	0	1.26785	0	0.383574	0	0.813299	1.12702	0.658515	0	0	0	0.587007	0	2.26005	1.94406	0.911485	0	1.74754	0	1.24971	0
3110047P20Rik	0	0	0	0	0	0	0	0	0	0	0	0	0	0	0	0	0	0	0	0	0	0	0	0
3110052M02Rik	1.59237	1.79839	2.43703	2.60521	1.61363	0	2.10642	0.868649	1.28123	2.08729	1.68108	1.41458	2.74536	7.50185	3.66504	3.5603	2.20374	1.17904	3.69814	2.31847	3.22512	5.03764	3.08245	2.19836
3110056K07Rik	5.66602	10.3612	11.8006	16.3503	10.0858	29.0347	18.4118	3.23988	8.43193	8.3457	9.84997	10.9731	11.4021	10.2879	22.7598	12.1807	9.17413	6.48711	10.1971	9.30312	10.7868	8.56264	17.4086	15.4569
3110057O12Rik	1.73485	2.57846	3.06665	1.20391	2.63384	0	4.11391	0	1.65636	1.83272	2.91965	2.75317	4.07693	0	4.74835	1.18933	2.04547	2.26168	2.93217	2.44846	3.01944	3.46925	3.45174	3.11909
3110062M04Rik	5.4833	7.04562	4.62125	8.63968	4.53016	7.72998	6.29184	3.50125	4.64118	5.06563	6.54077	6.20287	6.15959	12.2746	6.82769	6.19526	6.64348	3.73231	4.3837	6.20874	3.89379	6.25022	6.07261	8.48602
3110070M22Rik	3.18793	3.04509	2.36935	5.39208	2.56105	0	2.08974	0	4.10583	3.98285	3.6575	2.69907	3.09729	0	1.18551	0	2.53546	2.37845	0.920496	1.50149	2.11863	0	2.01897	6.4355
3110079O15Rik	0	0	0	0	0	0	0	0	0	0	0	0	0	0	0	0	0	0	0	0	0	0	0	0
3110082I17Rik	47.8506	47.0248	42.2882	50.0151	40.067	44.5006	25.1576	29.3094	45.2122	51.7495	39.3548	50.8135	30.8459	18.0565	19.736	25.1877	42.9945	57.5999	40.9805	46.3269	36.1978	30.5264	22.5742	12.9791
3110082J24Rik	0	0	0	0	0	0	0	0	0	0	0	0	0	0	0	0	0	0	0	0	0	0	0	0
3110099E03Rik	0	0	0	0	0	0	0	0	0	0	0	0	0	0	0	0	0	0	0	0	0	0	0	0
3200001D21Rik	0	0.123834	0.125621	0	0	0	0.174667	0	0.183013	0.12658	0.146745	0	0.150608	0	0.13123	0	0.226009	0.146912	0	0	0	0	0.112195	0
3300002I08Rik	0.60629	1.69259	1.20227	1.09435	2.17826	0	0	0	1.68495	1.17149	2.0862	0.499037	1.5514	0	1.84785	0	0.52035	1.32338	1.93354	0	0	0	1.0409	0
3300005D01Rik	0	0.442768	0	1.29054	1.14522	0	1.22755	0	0.659279	0.915417	0	0.276795	0.393661	0	0.958799	0	0.40716	0	0	2.78331	0	4.19721	2.41704	0
3425401B19Rik	0	0	0	0	0	0	0	0	0	0	0	0	0	0	0	0	0	0	0	0	0	0	0	0
3632451O06Rik	0	0	0	0	0	0	0	0	0	0	0	0	0	0	0	0	0	0	0	0	0	0	0	0
3632454L22Rik	0	0.1556	0.0785132	0.227997	0	0	0	4.56407	0	0	0	0	0	0	0.0821785	0	0	0	0	0	0	0	0.140712	0
3830403N18Rik	0	0	0	0	0	0	0	0	0	0	0	0	0	0	0	0	0	0	0	0	0.798375	0	0	0
3830406C13Rik	15.9386	10.131	20.7919	10.8312	16.8036	14.5555	4.59391	15.5282	17.4651	10.7243	19.7176	12.8282	18.0231	20.0923	3.06675	4.07503	11.9956	8.01338	21.7061	11.8495	19.087	13.345	3.82398	0
3830408C21Rik	1.09901	1.51651	1.69737	1.77559	0.96463	8.09162	1.28145	0	0.672804	0.775822	1.26103	2.75193	0.928798	7.1183	0.161005	0	1.52329	1.25847	1.16156	1.24006	1.87469	0	2.75105	0
3830417A13Rik	0	0	0	0	0	0	0	0	0	0	0	0	0	0	0	0	0	0	0	0	0	0	0	0
3930402G23Rik	0	0.097553	0	0	0.0879697	0	0	0	0	0	0	0	0	0	0	0	0	0	0	0	0	0	0	0
4430402I18Rik	0.271648	0	0	0	0	0	0	0	0	0	0.319402	0	0	0	0	0	0.242815	0	0	0	0	0	0	0
4631405J19Rik	0	0	0	0	0	0	0	0	0.367882	0	0	0	0	0	0	0	0	0	0	0	0.314305	0	0	0
4632415L05Rik	12.2915	9.12073	7.5289	11.493	10.6212	13.5399	8.60377	2.77652	10.3398	9.91091	7.32502	8.13909	12.1911	5.90656	10.3959	5.03918	9.6366	7.69578	10.1802	7.23089	12.5623	9.87275	10.7533	2.27124
4632427E13Rik	0	1.08359	0	1.05124	0.521194	11.2325	0.747035	0	1.61719	1.68612	0	4.79877	0.740037	9.52002	0.590584	0	0.499417	0.635784	1.23491	5.81534	1.48171	0	0.998644	0
4632428C04Rik	0	0	0	0	0	0	0.32685	0	0	0	0	0	0	0	0.36799	0	0	0	0.12626	0	0	0	0	0
4632428N05Rik	5.19818	10.2958	6.10765	6.68761	7.1834	0	15.2869	47.4615	6.24017	7.88756	6.42365	5.48574	8.1762	11.9041	14.6784	27.0878	4.15709	5.35691	6.02958	12.1831	5.77907	15.3836	21.0213	44.2683
4632434I11Rik	10.2147	5.32237	10.9068	7.91421	11.2894	10.0681	16.0619	16.0713	11.6106	8.18841	11.9088	7.74714	12.0303	15.4019	19.137	19.3167	6.73449	6.69903	12.3387	12.7399	12.3498	11.5381	15.2307	12.8684
4732416N19Rik	0	0	0	0	0	0	1.09972	0	0	0	0	0	1.03466	0	2.92747	5.53352	0.638114	0	0.835009	5.42974	0	0	0.464715	0
4732456N10Rik	0	0	0	0	0	0	0	0	0	0	0	0	0	0	0	0	0	0	0	0	0	0	0	0
4732471J01Rik	0.485453	1.16232	0.129118	1.98774	0.727613	0	1.71481	0	0.953337	0.991356	0	1.41313	0.478907	0	0.497149	0	1.30221	0.757837	0	0	0.828345	0	0.705658	0
4732490B19Rik	0	0	0	0	0	0	0	0	0.169682	0	0	0	0	0	0.121623	0	0	0	0.125185	0	0.140685	0	0	0
4732491K20Rik	0.357782	0.0868936	0.526768	0.0848628	0.15648	0	0	0	0.128308	0.17741	0.307913	0.395805	0.209284	0	0.183713	0	0.475344	0.309562	0.188908	1.02902	0.211458	0	0.078609	0
4831440E17Rik	0.830783	0.635763	1.92101	3.33173	0.725597	0	1.06364	1.05901	0.682283	0.825183	1.22572	2.63749	1.51972	2.5805	0.54882	0	0.579245	0.412121	2.44297	1.95034	1.18714	0.253645	2.03677	3.66434
4833403I15Rik	0	0	0	0	0	0	0	0	0	0	0	0.0775328	0	0	0	0	0	0	0	0	0	0	0	0
4833411C07Rik	0	0	0	0	0	0	0	0	0	0	0	0	0	0	0	0	0	0	0	0	0	0	0	0
4833412C05Rik	0	0	0	0	0	0	0	0	0	0	0	0	0	0	0	0	0	0	0	0	0	0	0	0
4833417C18Rik	5.98729	3.21618	5.18672	4.92555	5.48843	1.80836	6.76522	0	3.74387	4.00682	3.02257	5.60046	3.73543	0	3.9228	0	3.15255	4.07676	5.06784	4.1613	5.79118	0	5.01677	7.30876
4833418N02Rik	0	0.579324	0.986914	1.50641	0.706063	0	0	0	0	0.19787	0	0.174758	0.717503	0	0	0	0.176513	0.22868	0.636598	0	0.482364	0.863164	0.17545	0
4833419F23Rik	0	0.374365	0	0	0	0	1.04173	0	0	0	0	0.670011	0	0	0	0	0.34369	0	0	0	0	0	0.342655	0
4833420G17Rik	36.9587	35.187	29.604	30.4428	30.1161	25.4408	36.6819	48.8317	39.8273	31.4126	29.8528	32.6038	35.9246	31.7786	40.3443	38.0951	37.3321	35.2082	32.4345	39.909	36.3664	56.6887	42.8391	22.0192
4833422C13Rik	0	0.154913	0.157682	0	0	11.9028	0	0	0.234309	0	0	0.281055	0	0	0.658018	0	0.141471	0.183633	0	0	0	0	0.14053	0
4833423E24Rik	0	0	0	0	0	0	0	0	0	0	0	0	0	0	0	0	0	0	0	0	0	0	0	0
4833424O15Rik	0	0	0	0	0	0	0	0	0	0	0	0	0	0	0	0	0	0	0	0	0	0	0	0
4833427F10Rik	0.209716	0	0	0	0	0	0	0	0	0	0.240623	0.18241	0	0	0	0	0	0	0	0	0	0	0	0
4833427G06Rik	0	0	0	0	0	0	0	0	0	0	0	0	0	0	0	0	0	0	0	0	0	0	0	0
4833428L15Rik	0	0	0	0	0	0	0	0	0	0	0	0.654879	0	0	0	0	0	0	0	0	0	0	0	0
4833439L19Rik	36.2864	34.7208	39.0969	27.78	41.3902	20.2682	36.8026	37.0099	41.2979	33.2382	39.0143	33.3315	39.9178	77.5517	48.2966	41.4405	35.5016	35.6208	43.1911	27.1744	39.3298	28.0883	40.2247	36.285
4921501E09Rik	0	0	0	0	0	0	0	0	0	0	0	0	0	0	0	0	0	0	0	0	0	0	0	0
4921504A21Rik	0	0	0	0	0	0	0	0	0	0	0	0	0	0	0	0	0	0	0	0	0	0	0	0
4921504E06Rik	0.146655	0	0	0	0	0	0	0	0	0	0	0	0	0	0	0	0	0	0	0	0	0	0	0
4921506M07Rik	0	0	0	0	0	0	0	0	0	0	0	0	0	0	0	0	0	0	0	0	0	0	0	0
4921507L20Rik	0	0	0.389142	1.8568	0.347971	0	0.802789	0	0.563693	0.58527	0.680897	0.689394	0.23566	0	1.01341	0	0.348077	0.451009	0.41836	0	0.475314	0	0	0
4921507P07Rik	0.74642	0.963968	1.09972	0.940974	0.545057	3.58827	1.52991	0	0.890326	0.738918	0.713736	0.438169	1.17111	0	1.65962	0	1.31939	0.285929	0.92	2.30194	0.591281	2.93315	1.20072	0
4921508D12Rik	0	0	0	0	0	0	0	0	0	0	0	0	0	0	0	0	0	0	0	0	0	0	0	0
4921509C19Rik	0	0	0	0	0	0	0	0	0	0	0	0	0	0	0	0	0	0	0	0	0	0	0	0
4921509O07Rik	0	0	0	0	0	0	0	0	0	0	0	0	0	0	0	0	0	0	0	0	0	0	0	0
4921511C10Rik	0.211728	0.203571	0.208316	0.595418	0.559075	0	0	0	0	0.417335	0.242931	0.184107	0.758505	0	0	0	0.186123	0.241004	0.223937	0	0.254914	0	0	0
4921511C20Rik	0	0	0	0	0	0	0	0	0	0	0	0	0	0	0	0	0	0	0	0	0	0	0	0
4921511H03Rik	0	0	0	0	0	0	0	0	0	0	0	0	0	0	0	0	0	0	0	0	0	0	0	0
4921511I17Rik	0	0	0	0	0	0	0	0	0	0	0	0	0	0	0	0	0	0	0	0	0	0	0	0
4921511M17Rik	0	0	0	0	0	0	0	0	0	0	0	0	0	0	0	0	0	0	0	0	0	0	0	0
4921513I03Rik	0	0	0	0	0	0	0	0	0	0	0	0	0	0	0	0	0	0	0	0	0	0	0	0
4921515E04Rik	0	0	0	0	0	0	0	0	0	0	0	0	0	0	0	0	0	0	0	0	0	0	0	0
4921517D22Rik	0	0	0	0	0.158035	0	0.124011	0	0	0.0895786	0	0	0.105693	0	0.185527	0	0	0	0	0	0	0	0.0793833	0
4921524J17Rik	22.2442	21.0013	22.9265	21.6361	21.5763	20.5599	25.3269	0	28.4515	22.7339	25.657	25.4512	26.5476	16.4429	20.889	23.405	19.9523	24.3974	27.0087	17.7875	24.3238	19.4964	18.9434	15.7964
4921524L21Rik	0	0	0	0	0	0	0	0	0	0	0	0	0	0	0	0	0	0	0	0	0	0	0	0
4921525O09Rik	49.8587	42.4031	26.7153	22.3881	17.6086	18.6598	11.5133	10.8395	55.418	49.7966	26.0777	18.6681	31.6256	23.0211	8.87453	6.94028	49.2217	45.472	32.9395	36.1837	24.2986	26.2554	12.2283	1.08057
4921529L05Rik	0	0	0	0	0	0	0	0	0	0	0	0	0	0	0	0	0	0	0	0	0	0	0	0
4921530L21Rik	0	0	0	0	0	0	0	0	0	0	0	0	0	0	0	0	0	0	0	0	0	0	0	0
4921531C22Rik	2.19152	1.66329	4.15393	5.0162	2.88527	7.5933	2.12958	1.94249	2.01251	2.32064	3.23306	2.33238	3.14833	4.54223	0.802655	0	2.34728	2.15111	2.48169	2.19816	4.29874	1.00804	3.15442	5.16231
4921531P14Rik	0	0	0	0	0	0	0	0	0	0	0	0	0	0	0	0	0	0	0	0	0	0	0	0
4921533I20Rik	0	0	0	0	0	0	0	0	0	0	0	0	0	0	0	0	0	0	0	0	0	0	0	0
4921534H16Rik	0	0	0	0	0	0	0	0	0	0	0	0	0	0	0	0	0	0	0	0	0	0	0	0
4921536K21Rik	0	0	0.108092	0	0.09639	0	0	0	0	0	0	0.291394	0.387675	0	0	0	0.292128	0	0	0	0.130521	0	0.193303	0
4921539E11Rik	0	0	0	0	0	0	0	0	0	0	0	0	0	0	0	0	0	0	0	0	0	0	0	0
4922501C03Rik	1.40017	1.66783	2.13629	0.44447	1.58464	1.97468	1.4315	0	1.715	1.59738	0.952138	0.969112	1.6279	2.25493	1.49235	0.456494	1.7495	1.86232	1.97048	2.53592	1.82874	1.88347	1.78053	2.0106
4922502D21Rik	0	0	0	0	0	0	0	0	0	0	0	0	0	0	0	1.98016	0	0	0	0	0	0	0	0
4922502H24Rik	0	0	0	0	0	0	0	0	0	0	0	0	0	0	0	0	0	0	0	0	0	0	0	0
4922502N22Rik	0	0	0	0	0	0	0	0	0	0	0	0	0	0	0	0	0	0	0	0	0	0	0	0
4922505E12Rik	0	0	0	0	0	0	0	0	0	0	0	0	0	0	0	0	0	0	0	0	0	0	0	0
4930401C15Rik	0	0	0	0	0	0	0	0	0	0	0	0	0	0	0	0	0	0	0	0	0	0	0	0
4930401O10Rik	0	0	0	0	0	0	0	0	0	0	0	0	0	0	0	0	0	0	0	0	0	0	0	0
4930401O12Rik	0	0	0	0	0	0	0	0	0	0	0	0	0	0	0	0	0	0	0	0	0	0	0	0
4930402F06Rik	0	0	0	0	0	0	0	0	0	0	0	0	0	0	0	0	0	0	0.260189	0	0	0	0	0
4930402F11Rik	0	0	0	0	0	0	0	0	0	0	0	0	0	0	0	0	0	0	0	0	0	0	0	0
4930402H24Rik	1.22072	1.24339	0.81641	0.84516	0.726789	6.59107	1.07163	0	1.03695	0.826863	0.89142	0.789623	0.839156	0	0.342143	1.15373	1.182	0.321265	0.702824	1.62729	0.717848	0.829953	0.976828	1.8595
4930402K13Rik	0	0	0	0	0	0	0	0	0	0	0	0	0	0	0	0	0	0	0	0	0	0	0	0
4930404A05Rik	0	0	0	0	0	0	0	0	0	0	0	0	0	0	0	0	0	0	0	0	0	0	0	0
4930404A10Rik	0	0	0	0	0	0	0	0	0	0	0	0	0	0	0	0	0	0	0	0	0	0	0	0
4930404H11Rik	0	0	0	0	0	0	0	0	0	0	0	0	0	0	0	0	0	0	0	0	0	0	0	0
4930404I05Rik	0.345821	0.986358	2.72912	1.27986	0.612958	0	3.21009	0	1.46473	1.35403	0.793481	2.95048	2.5354	0	1.7662	0	2.1106	1.55188	2.56477	8.89797	3.39999	1.49743	1.50188	0
4930404N11Rik	6.02134	6.65396	2.7106	9.43879	4.41167	0	2.12063	8.54399	3.81678	5.83445	2.51155	5.90433	4.85138	0	1.11359	0	3.77173	6.61215	3.48885	3.20858	4.16587	2.39221	1.88455	18.5982
4930405A10Rik	0	0	0	0	0	0	0	0	0	0	0	0	0	0	0	0	0	0	0	0	0	0	0	0
4930405A21Rik	0	0	0	0	0.299319	0	0.448528	0	0	0	0.387671	0	0.412294	0	0.345186	0	0.589465	0	0.357945	0	0	2.19382	0	0
4930405D11Rik	0	0	0	0	0	0	0	0	0	0	0	0	0	0	0	0	0	0	0	0	0	0	0	0
4930405J17Rik	0	0	0	0	0	0	0	0	0	0	0	0	0	0	0	0	0	0	0	0	0	0	0	0
4930405L22Rik	0	0	0	0	0	0	0	0	0	0	0	0	0	0	0	0	0	0	0	0	0	0	0	0
4930406D18Rik	0	0	0	0	0	0	0	0	0	0	0	0	0	0	0	0	0	0	0	0	0	0	0	0
4930407I10Rik	0	0	0	0	0	0	0	0	0	0	0	0	0	0	0	0	0	0	0	0	0	0	0	0
4930412B13Rik	0	0	0	0	0	0	0	0	0	0	0	0	0	0	0	0	0	0	0	0	0	0	0	0
4930412C18Rik	0	0	0	0	0	0	0	0	0	0	0	0	0	0	0	0	0	0	0	0	0	0	0	0
4930412D23Rik	0	0	0	0	0	0	0	0	0	0	0	0	0	0	0	0	0	0	0	0	0	0	0	0
4930412O13Rik	0	0.0673106	0	0.263026	0	0	0	0	0	0.0686669	0	0	0	0	0	0	0	0	0.146044	0	0	0	0.182535	0
4930413E15Rik	0	0	0	0	0	0	0	0	0	0	0	0	0	0	0	0	0	0	0	0	0	0	0	0
4930413F20Rik	0	0	0	0.83455	0	0	0	0	0	0	0	0	0	0	0	0	0	0.337476	0	0	0	0	0	0
4930413G21Rik	16.4989	15.8482	18.2113	27.9752	9.81775	15.5	4.80938	13.2374	12.6872	10.102	23.0232	28.2599	8.00259	0	6.39319	5.88242	10.1847	12.9273	19.3396	19.7974	7.79788	12.9608	8.76369	3.86566
4930413M19Rik	0	0	0	0	0	0	0	0	0	0	0	0	0	0	0	0	0	0	0	0	0	0	0	0
4930414L22Rik	4.32904	6.89924	5.03378	8.11191	3.81042	4.38781	4.19704	7.92964	1.61562	3.2076	6.79868	10.4918	2.65583	3.25512	2.59556	0.277118	3.31289	5.50563	6.12036	13.4869	4.54325	15.144	4.42597	5.38195
4930414N06Rik	0	0	0	0	0	0	0	0	0	0	0	0	0	0	0	0	0	0	0	0	0	0	0	0
4930415F15Rik	0	0.457631	0	0	0.434746	0	0.633856	0	0	0.473315	0	0.407425	0	0	0	0	0	1.0764	1.03383	0	0	0	0	0
4930415L06Rik	0	0	0	0	0	0	0	0	0	0	0	0	0	0	0	0	0	0	0	0	0	0	0	0
4930415O20Rik	0	0	0	0	0	0	0	0	0	0	0	0	0	0	0.756079	0	0	0	0	0	0	0	0	0
4930417O13Rik	0.600657	0.57324	0	2.23282	1.06217	0	0	0	1.27562	0.294656	1.72281	0.773642	0.364105	0	0.614129	0	0.787735	0	0.63602	0	0.733019	0	0.522807	0
4930417O22Rik	0	0	0	0	0	0	0	0	0	0	0	0	0	0	0	0	0	0	0	0	0	0	0	0
4930419G24Rik	0	0.296792	0	0	0	0	0	0	0	0	0	0	0	0	0	0	0	0	0	0	0	0	0	0
4930423M02Rik	0	0	0	0	0	0	0	0	0	0	0	0	0	0	0	0	0	0	0	0	0	0	0	0
4930425K10Rik	0	0	0	0	0	0	0	0	0	0	0	0	0	0	0	0	0	0	0	0	0	0	0	0
4930425O10Rik	0	0.421712	0	0	0	0	0	0	0	0	0	0	0	0	0	0	0.385636	0	0	0	0	0	0	0
4930426D05Rik	0	0	0	0	0	0	0	0	0	0	0	0	0	0	0	0	0	0	0	0	0	0	0	0
4930426L09Rik	1.66586	1.20161	2.25349	2.34315	0.916242	0	2.53165	0	1.18601	0.410517	2.15028	2.53621	1.49108	0	1.70651	0	0.915447	0.948459	1.32138	1.6344	1.754	0	2.91214	0
4930427A07Rik	37.2704	28.946	28.8171	35.5393	32.666	30.1974	32.8306	28.2411	37.9079	41.8961	27.9002	37.1835	30.9767	46.6569	24.9723	14.4572	31.5313	40.9822	30.7375	30.7694	33.1894	45.0009	25.885	25.0836
4930428D18Rik	0	0	0	0	0	0	0	0	0	0	0	0	0	0	0	0	0	0	0	0	0	0	0	0
4930428E07Rik	0	0	0	0	0	0	0	0	0	0	0	0	0	0	0	0	0	0	0	0	0	0	0	0
4930428G15Rik	0	0	0	0	0	0	0	0	0	0	0	0	0	0	0	0	0	0	0	0	0	0	0	0
4930428O21Rik	0.346681	0.167202	0.511259	0.326204	0.152272	0	0	0	0.494712	0.684678	1.19335	0.757796	0.205656	0	1.0662	0	0.458215	0.59441	1.64921	0	0	0	0	0
4930429B21Rik	0.915416	1.91653	1.21722	0.872121	0.401652	0	1.88733	3.47308	0.435995	0.904911	1.4115	3.29286	0.721526	0	0.938849	6.71366	1.48069	0.349583	1.06385	0	1.09233	0	1.60436	3.53633
4930429D17Rik	0	0	0	0	0	0	0	0	0	0	0	0	0	0	0	0	0.164682	0	0	0	0	0	0	0
4930429F11Rik	0	0	0	0	0	0	0	0	0	0	0	0	0	0	0	0	0	0	0	0	0	0	0	0
4930429F24Rik	0	0.19485	0.597603	0	0.178152	0	0	0	0.288443	0.199667	0	0	0.482875	0	0.207466	0	0	0	0.642454	0	0	0	0.177045	0
4930430A15Rik	0	0	0	0	0	0	0	0	0	0	0	0	0	0	0	0	0	0	0	0	0	0	0	0
4930430D24Rik	0	0	0	0	0	0	0	0	0	0	0	0	0	0	0	0	0	0	0	0	0	0	0	0
4930430F08Rik	1.89256	1.96137	3.87152	4.40593	3.40031	0	1.78432	3.11441	2.04965	1.97594	3.97404	3.36091	4.76681	7.38375	2.21292	1.23091	2.6324	2.47917	3.40669	2.68663	5.96157	8.65081	2.52311	2.73175
4930430F21Rik	0	0	0	0	0	0	0	0	0	0	0	0	0	0	0	0	0	0	0	0	0	0	0	0
4930430J02Rik	0	0	0	0	0	0	0	0	0	0	0	0	0	0	0	0	0	0	0	0	0	0	0	0
4930431F12Rik	0	0	0	0	0	0	0	0	0	0.127436	0	0	0	0	0	0	0	0	0	0	0	0	0	0
4930431P03Rik	0.766586	0.494864	0.502	0	0.559878	0	0.349003	0	0.914188	0.758751	0.87962	0.787129	2.106	0	0.393309	0	0.451585	0.733862	0.26997	1.12531	1.82268	1.64337	1.56923	0
4930432J09Rik	0	0	0	0	0	0	0	0	0	0.17989	0	0	0	0	0	0	0	0.104622	0	0	0	0	0	0
4930432K21Rik	1.82068	1.64635	0.35761	0.918355	1.16978	2.94867	0.66368	0	0.99468	1.08158	0.557084	0.427677	0.856529	2.64067	2.86507	0	1.60944	1.39534	0.256427	1.49787	0.576622	2.08106	0.958637	6.79257
4930432M17Rik	0	0	0	0	0	0	0	0	0	0	0	0	0	0	0	0	0	0	0	0	0	0	0	0
4930433B08Rik	0	0	0	0	0	0	0	0	0	0	0	0	0	0	0	0	0	0	0	0	0	0	0	0
4930433I11Rik	0	0	0	0	0	0	0	0	0	0	0	0	0	0	0	0	0	0	0	0	0	0	0	0
4930433N12Rik	0	0	0	0	0	0	0	0	0	0	0	0	0	0	0	0	0	0	0	0	0	0	0	0
4930434J06Rik	0	0	0	0	0	0	0	0	0	0	0	0	0	0	0	0	0	0	0	0	0	0	0	0
4930435E12Rik	0	0	0	0	0	0	0	0	0	0	0	0	0	0	0	0	0	0	0	0	0	0	0	0
4930438E09Rik	0	0	0	0	0	0	0	0	0	0	0	0	0	0	0	0	0	0	0	0	0	0	0	0
4930440C22Rik	0	0	0	0	0	0	0	0	0	0	0	0	0	0	0	0	0	0	0	0	0	0	0	0
4930440I19Rik	0	0	0	0	0	0	0	0	0	0	0	0	0	0	0	0	0	0	0	0	0	0	0	0
4930441J16Rik	0	0	0	0	0	0	0	0	0	0	0	0	0	0	0	0	0	0	0	0	0	0	0	0
4930442J19Rik	0	0	0	0	0	0	0	0	0	0	0	0	0	0	0	0	0	0	0	0	0	0	0	0
4930442L01Rik	0	0	0	0	0	0	0	0	0	0	0	0	0	0	0	0	0	0	0.152278	0	0	0	0	0
4930443O20Rik	0	0	0	0	0	0	0	0	0	0	0	0	0	0	0	0	0	0	0	0	0	0	0	0
4930444F02Rik	0	0	0	0	0	0	0	0	0	0	0	0	0	0	0	0	0	0	0	0	0	0	0	0
4930444G20Rik	0	0	0	0	0	0	0	0	0	0	0	0	0	0	0	0	0	0.194515	0	0	0	0	0	0
4930444M15Rik	0	0	0	0	0	0	0	0	0	0	0	0	0	0	0	0	0	0	0	0	0	0	0	0
4930444P10Rik	0	0	0	0	0	0	0	0	0	0	0	0	0	0	0	0	0	0	0	0	0	0	0	0
4930447A16Rik	0	0	0	0	0	0	0	0	0	0	0	0	0	0	0	0	0	0	0	0	0	0	0	0
4930447C04Rik	0	0	0	0	0	0	0	0	0	0	0	0	0	0	0	0	0	0	0	0	0	0	0	0
4930447J18Rik	0	0	0	0	0	0	0	0	0	0	0	0	0	0	0	0	0	0	0	0	0	0	0	0
4930447K03Rik	0	0	0	0	0	0	0	0	0	0	0	0.275534	0	0	0	0	0	0	0	0	0	0	0	0
4930447N08Rik	0	0	0	0	0	0	0	0	0	0	0	0	0	0	0	0	0	0	0	0	0	0	0	0
4930448C13Rik	0	0	0	0	0	0	0	0	0	0	0	0	0	0	0	0	0	0	0	0	0	0	0	0
4930448F12Rik	0	0	0	0	0	0	0	0	0	0	0	0	0	0	0	0	0	0	0	0	0	0	0	0
4930448H16Rik	0	0	0	0	0	0	0	0	0	0	0	0	0	0	0	0	0	0	0	0	0	0	0	0
4930448I06Rik	0	0	0	0	0	0	0	0	0	0	0	0	0	0	0	0	0	0	0	0	0	0	0	0
4930448I18Rik	0	0	0	0	0	0	0	0	0	0	0	0	0	0	0	0	0	0	0	0	0	0	0	0
4930448K20Rik	0	0	0	0	0	0	0	0	0	0	0	0	0	0	0	0	0	0	0	0	0	0	0	0
4930449E01Rik	0	0	0	0	0	0	0	0	0	0	0	0	0	0	0	0	0	0	0	0	0	0	0	0
4930449E18Rik	0	0	0	0	0	0	0	0	0	0	0	0	0	0	0	0	0	0	0	0	0	0	0	0
4930449I24Rik	0	0	0	0	0	0	0	0	0	0	0	0	0	0	0	0	0	0	0	0	0	0	0	0
4930451C15Rik	0	0.132873	0	0	0	0	0	0	0	0	0	0	0	0	0	0	0	0	0	0	0	0	0	0
4930451G09Rik	0.201799	0.596448	0.454537	0.436005	0.40589	0	0.419602	2.7112	0.220256	0.400016	0.361985	0.405503	0.118262	0	0	0	0.267907	0.35318	0	0.541377	0.716802	0.992677	0	0.524499
4930451I11Rik	0	0	0	0	0	0	0	0	0	0	0	0	0	0	0	0	0	0	0	0	0	0	0	0
4930452A19Rik	0	0	0	0	0	0	0	0	0	0	0	0	0	0	0	0	0	0	0	0	0	0	0	0
4930452B06Rik	0	1.30907	0	0	0	0	0	0	0	0.102847	0	0	0	0	0	0	0.826564	0	0.109613	0	0	0	0	0
4930452G13Rik	0	0	0	0	0	0	0	0	0	0	0	0	0	0	0	0	0	0	0	0	0	0	0	0
4930452N14Rik	0	0	0	0	0	0	0	0	0	0	0	0	0	0	0	0	0	0	0	0	0	0	0	0
4930453H23Rik	0	0	0	0	0	0	0	0	0	0	0	0	0	0	0	0	0	0	0	0	0	0	0	0
4930453L07Rik	0	0	0	0	0	0	0	0	0	0	0	0	0	0	0	0	0	0	0	0	0	0	0	0
4930453N24Rik	43.5544	44.5138	87.3779	52.902	60.7058	125.487	47.1424	33.3686	52.487	44.2681	79.3034	46.3516	45.9865	76.0409	60.3427	42.694	51.9409	44.3367	79.3891	49.9893	54.64	47.4254	54.9634	39.9892
4930455B14Rik	0	0	0	0	0	0	0	0	0	0	0	0	0	0	0	0	0	0	0	0	0	0	0	0
4930455C13Rik	2.15763	3.65378	0	3.60289	0.426686	0	0	0	0	1.56855	2.737	4.78216	0.744166	0	2.24979	10.3069	1.84157	2.40792	2.0117	1.7929	0	0	0.533458	0
4930455D15Rik	0	0	0.185264	0	0	0	0	0	0	0	0	0	0	0	0	0	0.16584	0	0	0	0	0	0	0
4930455F16Rik	0	0	0	0	0	0	0	0	0	0	0	0	0	0	0	0	0	0	0	0	0	0	0	0
4930455H04Rik	0	0	0	0	0	0	0	0	0	0	0	0	0	0	0	0	0	0	0	0	0	0	0	0
4930455J16Rik	0	0	0	0	0	0	0	0	0	0	0	0	0	0	0	0	0	0	0	0	0	0	0	0
4930456L15Rik	0	0	0	0	0	0	0	0	0	0	0	0	0	0	0	0	0	0	0	0	0	0	0	0
4930459C07Rik	0	0	0	0	0	0	0	0	0	0	0	0	0	0	0	0	0	0.301235	0	0	0	0	0	0
4930459L07Rik	0	0	0	0	0	0	0	0	0	0	0	0	0	0	0	0	0	0	0	0	0	0	0	0
4930461G14Rik	0	0	0	0	0	0	0	0	0	0	0	0	0	0	0	0	0	0	0	0	0	0	0	0
4930465K10Rik	0.505497	0	0.746623	0.943904	0.222929	0	0.339377	0	0.717793	0.248575	0	0.436988	0.607865	0	0.258674	0	0.443248	0	0.802392	0	0.612411	0	0.220469	0
4930465M20Rik	0	0	0	0	0	0	0	0	0	0	0	0	0	0	0	0	0	0	0	0	0	0	0	0
4930467D21Rik	0	0	0	0	0	0	0	0	0	0	0	0	0	0	0	0	0	0	0	0	0	0	0	0
4930467E23Rik	0	0	0	0	0	0	0	0	0	0	0	0	0	0	0	0	0	0	0	0	0	0	0	0
4930467K11Rik	0	0	0	0	0	0	0	0	0	0	0	0	0	0	0	0	0	0	0	0	0	0	0	0
4930468A15Rik	0	0	0	0	0	0	0	0	0	0	0	0	0	0	0	0	0	0	0	0	0	0	0	0
4930469G21Rik	0	0	0	0	0	0	0	0	0	0	0	0	0	0	0	0	0	0	0.378818	0	0	0	0	0
4930470H14Rik	0	0	0	0	0	0	0	0	0	0	0	0	0	0	0	0	0	0	0	0	0	0	0	0
4930470P17Rik	0	0	0	0	0	0	0	0	0	0	0	0	0	0	0	0	0	0	0	0	0	0	0	0
4930471C04Rik	0	0	0	0	0	0	0	0	0	0	0	0	0	0	0	0	0	0	0	0	0	0	0	0
4930471G03Rik	0	0	0	0	0	0	0	0	0	0	0	0	0	0	0	0	0	0	0	0	0	0	0	0
4930471M09Rik	0	0	0	0	0	0	0	0	0	0	0	0	0.356453	0	0	0	0	0	0	0	0	0	0	0
4930473A02Rik	0	0	0	0	0	0	0.305644	0	0	0.238299	0	0	0	0	0	0	0.19345	0	0	0	0	0	0	0
4930473O22Rik	0	0	0	0	0	0	0	0	0	0	0	0	0	0	0	0	0	0	0	0	0	0	0	0
4930474G06Rik	0	0	0	0	0	0	0	0	0	0	0	0	0	0	0	0	0	0	0	0	0	0	0	0
4930474H20Rik	0	0	0	0	0	0	0	0	0	0	0	0	0	0	0	0	0	0	0	0	0	0	0	0
4930474M22Rik	0	0	0	0	0	0	0	0	0	0	0	0	0.853553	0	0	0	0	0	0	0	0	0	0	0
4930474N05Rik	0	0	0	0	0	0	0	0	0	0	0	0	0	0	0	0	0	0	0	0	0	0	0	0
4930474N09Rik	0	0	0	1.28125	0	0	0	0	0	0	0	0	0	0	0	0	0	0	0	0	0	0	0	0
4930478L05Rik	0.317682	0	0	0	0	0	0	0	0	0.156918	0.182199	0.13913	0	0	0	0	0	0	0.167831	0	0.189656	0	0.278275	0
4930478P22Rik	0	0	0	0	0	0	0	0	0	0	0	0	0	0	0	0	0	0	0	0	0	0	0	0
4930479D17Rik	0	0	0	0	0	0	0	0	0	0.487302	0	0.837851	0	0	0	0	0.433354	0	0	0	0.63188	0	0.432752	0
4930480E11Rik	0	0	0	0	0	0	0	0	0	0	0	0	0	0	0	0	0	0	0	0	0	0	0	0
4930480G23Rik	0	0	0	0	0	0	0	0	0	0	0	0	0	0	0	0	0	0	0	0	0	0	0	0
4930480K15Rik	0	0	0	0	0	0	0	0	0	0	0	0	0	0	0	0	0	0	0	0	0	0	0	0
4930480M12Rik	0	0	0	0	0	0	0	0	0	0	0	0	0	0	0	0	0	0	0	0	0	0	0	0
4930481A15Rik	0.995788	0.524394	1.22659	1.41	1.53674	0	1.74168	0	1.06075	0.489766	0	0.645972	0.319427	0	0.254804	0	0.650294	1.1289	1.05371	0	0.60285	0	1.08595	0
4930482G09Rik	0	0	0	0	0	0	0	0	0	0.419175	0	0	0	0	0	0	0	0	0	0	0	0	0	0
4930483J18Rik	0	0.286937	0.296338	0	0	0	0	0	0	0.294985	0.689908	0	0.36454	0	0.922232	0	0.262871	0.338959	0	0	0	0	0.523393	0
4930483K19Rik	0.540438	0.254524	0	0	0	0	0.346402	0	0	0.273131	0.676315	0	0.326596	0	0	0	0.25494	0.311329	0	0	0.327116	0	0.675424	0
4930483O08Rik	0	0	0	0	0	0	0	0	0	0	0	0	0	0	0	0	0	0	0	0	0	0	0	0
4930486F22Rik	0	0	0	0	0	0	0	0	0	0	0	0	0	0	0	0	0	0	0	0	0	0	0	0
4930486I03Rik	0	0	0	0	0	0	0	0	0	0	0	0	0	0	0	0	0	0	0	0	0	0	0	0
4930486L24Rik	0.454331	0.43626	0.670717	0	1.20062	0	0.612167	0	0.323082	0.447411	1.3032	0.788381	1.08792	0	0.69785	0	0.199504	0.258142	0.480625	0	0.274142	0	7.14188	16.2072
4930487D11Rik	0	0	0	0	0	0	0	0	0	0	0	0	0	0	0	0	0	0	0	0	0	0	0	0
4930487H11Rik	0	0	0	0	0	0	0	0	0	0	0	0	0	0	0	0	0	0	0	0	0	0	0	0
4930488B22Rik	0	0	0	0	0	0	0	0	0	0	0	0	0	0	0	0	0	0	0	0	0	0	0	0
4930488L21Rik	0	0	0	0	0	0	0	0	0	0	0	0	0	0	0	0	0.141726	0	0	0	0	0	0	0
4930500F04Rik	0	0	0	0	0	0	0	0	0	0	0	0	0	0	0	0	0	0	0	0	0	0	0	0
4930500J02Rik	0	0	0	0	0	0	0	0	0	0	0	0	0	0	0	0	0	0	0	0	0	0	0	0
4930500L23Rik	0	0	0	0	0	0	0	0	0	0	0	0	0	0	0	0	0	0	0	0	0	0	0	0
4930502A04Rik	0	0	0	0	0	0	0	0	0	0	0	0	0	0	0	0	0	0	0	0	0	0	0	0
4930502E09Rik	0	0	0	0	0	0	0	0	0	0	0	0	0	0	0	0	0	0	0	0	0.613078	0	0	0
4930502E18Rik	0.26675	0	0	0	0	0	0	0	0	0.524317	0	0	0	0	0	0	0	0	0	0	0	0	0	0
4930503B20Rik	0	0	0	0.306428	0.292857	0	0	0	0	0.32396	0.240709	0	0.403041	0	1.01373	0	0	0	0.350314	0	0	0	0.287446	0
4930503E14Rik	0	0	0	0	0	0	0	0	0	0	0	0	0	0	0	0	0	0	0	0	0	0	0	0
4930503E24Rik	0	0	0	0	0	0	0	0	0	0	0	0	0	0	0	0	0	0	0	0	0	0	0	0
4930503H13Rik	0	0	0	0	0	0	0	0	0	0	0	0	0	0	0	0	0	0	0	0	0	0	0	0
4930503L19Rik	14.7354	9.34889	9.73251	12.8478	15.1405	18.125	12.3195	13.4597	13.8163	11.9449	10.6405	7.82681	16.5994	13.1277	15.7724	8.323	12.0109	9.48607	10.1997	13.3153	14.0429	31.8603	13.9308	9.20668
4930503O07Rik	0	0	0	0	0	0	0	0	0	0	0	0	0	0	0	0	0	0	0	0	0	0	0	0
4930504O13Rik	0	0	0	0	0	0	0	0	0	0	0	0	0	0	0	0	0	0	0	0	0	0	0	0
4930505A04Rik	0	0	0	0	0	0	0	0	0	0	0	0	0	0	0	0	0	0	0	0	0	0	0	0
4930505G20Rik	0	0	0	0	0	0	0	0	0	0	0	0	0	0	0	0	0	0	0	0	0	0	0	0
4930506C21Rik	1.03882	0	0	1.28148	0.613773	0	1.83662	3.13145	0.488868	0	0.397259	0.886244	0	0	0.707399	0	0.9057	0	0	0	1.27675	0	1.50382	0
4930506M07Rik	0.148486	2.05781	0	0.705498	0.259576	10.3937	0.102149	0	0.106598	0.474024	0	0.724419	0	6.72747	0	17.1591	0.0658137	0.257387	0.15677	17.6423	0.262691	12.7017	0.130587	23.8905
4930507D05Rik	0.977154	1.47938	1.73027	2.1622	1.69085	0	0.859395	3.39493	2.13337	1.66481	2.58009	3.7074	1.40922	0	0.724513	0.348131	1.22207	1.89115	1.25836	6.33545	2.04175	0	2.05748	0
4930507D10Rik	0	0	0	0	0	0	0	0	0	0	0	0	0	0	0	0	0	0	0	0	0	0	0	0
4930509E16Rik	2.16453	1.55316	4.26418	1.51303	2.14976	0	1.08729	0	1.15132	1.06343	2.17297	3.26627	1.63175	0	2.76806	0	1.42193	0.918046	2.86385	0	4.93027	0	0.707456	0
4930509J09Rik	0	0	0	0	0	0	0	0	0	0	0	0	0	0	0	0	0	0	0	0	0	0	0	0
4930509K18Rik	0	0	0	0	0	0	0	0	0	0	0	0	0	0	0	0	0	0	0	0	0	0	0	0
4930511A02Rik	0	0	0	0	0	0	0	0	0	0	0	0	0	0	0	0	0	0	0	0	0	0	0	0
4930511E03Rik	0	0	0	0	0	0	0	0	0	0	0	0	0	0	0	0	0	0	0	0	0	0	0	0
4930511M06Rik	0	0	0	0	0	0	0	0	0	0	0	0	0	0	0	0	0	0	0	0	0	0	0	0
4930512B01Rik	0	0	0	0	0	0	0	0	0	0	0	0	0	0	0	0	0	0	0	0	0	0	0	0
4930513D17Rik	0	0	0	0	0	0	0	0	0	0	0	0	0	0	0	0	0	0	0	0	0	0	0	0
4930513N10Rik	3.88284	3.07388	2.80893	2.71103	4.57735	3.41608	3.50126	7.56527	3.36855	3.13931	1.64149	2.2566	4.07298	0.555643	3.14719	3.48404	3.16512	2.70739	3.45341	4.0627	3.63034	2.84435	3.8822	4.46542
4930513O06Rik	0	0	0	0	0	0	0	0	0	0	0	0	0	0	0	0	0	0	0	0	0	0	0	0
4930515B02Rik	0	0	0	0	0	0	0	0	0	0	0	0	0	0	0	0	0	0	0	0	0	0	0	0
4930515G01Rik	1.78801	4.89377	3.77292	5.96043	1.8026	4.62554	4.11424	0	2.53851	2.2606	2.3445	3.53164	2.45838	0.463669	1.82983	2.16784	8.28572	3.18308	2.4328	6.2015	2.16707	0	2.89615	7.25748
4930515G16Rik	0	0	0	0	0	0	0	0	0	0	0	0	0	0	0	0	0	0	0	0	0	0	0	0
4930515L03Rik	0	0	0	0	0	0	0	0	0	0	0	0	0	0	0	0	0	0	0	0	0	0	0	0
4930515L19Rik	0	0	0	0	0	0	0	0	0	0	0	0	0	0	0	0	0	0	0	0	0	0	0	0
4930517E11Rik	0	0	0	0	0	0	0	0	0	0	0	0	0	0	0	0	0	0	0	0	0	0	0	0
4930518P08Rik	0	0	0	0	0	0	0	0	0	0	0	0	0	0	0	0	0	0	0	0	0	0	0	0
4930519D14Rik	0	0	0	0	0	0	0	0	0	0	0	0	0	0	0	0	0	0	0	0	0	0	0	0
4930519F09Rik	3.78101	3.06462	3.71916	1.30742	6.47655	8.43015	6.72904	12.676	4.25279	3.53251	3.88161	3.4671	3.79399	0	9.17531	11.0107	2.10086	4.30978	4.84014	6.25481	3.3478	2.99588	7.65657	4.88926
4930519F16Rik	0	0	0	0	0	0	0	0	0	0	0	0	0	0	0	0	0	0	0	0	0	0	0	0
4930519F24Rik	0	0	0	0	0	0	0	0	0	0	0	0	0	0	0	0	0	0	0	0	0	0	0	0
4930519G04Rik	0	0	0	0	0	0	0	0	0	0	0	0	0	0	0	0	0	0	0	0	0	0	0	0
4930519H02Rik	0	0	0	0	0	0	0	0	0	0	0	0	0	0	0	0	0	0	0	0	0	0	0	0
4930520O04Rik	6.90744	8.8784	8.29876	13.1115	8.22764	36.1835	8.41202	7.90025	7.22187	6.48204	14.459	13.4121	6.0335	0	8.29062	12.4144	14.4324	6.76473	8.89489	13.2088	7.31956	8.43533	4.96655	0
4930520P13Rik	0	0	0	0	0	0	0	0	0	0	0	0	0	0	0	0	0	0	0	0	0	0	0	0
4930521E06Rik	0	0	0	0	0	0	0	0	0	0	0	0	0	0	0	0	0	0	0	0	0	0	0	0
4930522H14Rik	0	0	0	0	0	0	0	0	0	0	0	0	0	0	0	0	0	0	0	0	0	0	0	0
4930522O17Rik	0	0	0	0	0	0	0	0	0	0	0	0	0	0	0	0	0	0	0	0	0	0	0	0
4930523C07Rik	4.11425	4.63098	2.17565	1.97628	6.41847	2.84745	9.63636	6.2462	5.47401	3.06373	1.82887	0.657542	6.42575	5.65049	8.47194	5.47238	1.38121	0.96908	2.34098	4.18041	5.3082	6.37087	12.4716	11.0786
4930523O13Rik	0	0	0	0	0	0	0	0	0	0	0	0	0	0	0	0	0	0	0	0	0	0	0	0
4930524B15Rik	0	0	0.14882	0	0.265762	0	0	0	0	0.299412	0	0	0	0	0	0	0	0.173513	0	0	0.361343	0	0	0
4930524C18Rik	0	0	0	0	0	0	0	0	0	0	0	0	0	0	0	0	0	0	0	0	0	0	0	0
4930524N10Rik	0	0	0	0	0	0	0	0	0	0	0	0	0	0	0	0	0	0	0	0	0	0	0	0
4930524O05Rik	0	0	0	0	0	0	0	0	0	0	0	0	0	0	0	0	0	0	0	0	0	0	0	0
4930524O08Rik	0	0	0	0	0	0	0	0	0	0	0	0	0	0	0	0	0	0	0	0	0	0	0	0
4930525D18Rik	0.364378	0	0	0	0	0	0	0	0	0	0	0	0.446679	0	0	0	0	0	0	0	0	0	0.316227	0
4930525G20Rik	0	0	0	0	0	0	0	0	0	0	0	0	0	0	0	0	0	0	0.100793	0	0	0	0	0
4930525M21Rik	0	0	0	0	0	0	0	0	0	0	0	0	0	0	0	0	0	0	0	0	0	0	0	0
4930526I15Rik	0	0	0	0	0	0	0	0	0	0	0	0	0	0	0	0	0	0	0	0	0	0	0	0
4930526L06Rik	0	0	0	0	0	0	0	0	0	0	0	0	0	0	0	0	0	0	0	0	0	0	0	0
4930527F14Rik	0	0	0	0	0	0	0	0	0	0	0	0	0	0	0	0	0	0	0	0	0	0	0	0
4930527G23Rik	0	0	0	0	0	0	0	0	0	0	0	0	0	0	0	0	0	0	0	0	0	0	0	0
4930528A17Rik	0.419781	0.26858	1.09412	0.658161	0.365185	0	0	0	0.199642	0.686589	0.319879	0.491412	0.16444	3.77558	0.723678	0	0.369082	0.320086	0	0.976774	0.502008	0.297732	0.488095	0
4930528D03Rik	0	0	0	0	0	0	0	0	0	0	0	0	0	0	0	0	0	0	0	0	0	0	0	0
4930528P14Rik	0	0	0	0	0	0	0	0	0	0	0	0	0	0	0	0	0	0	0	0	0	0	0	0
4930529C04Rik	0	0	0	0	0	0	0	0	0	0	0	0	0	0.289398	0.082014	0	0	0	0	0	0	0	0	0
4930529K09Rik	0	0	0	0	0	0	0	0	0	0	0	0	0	0	0	0	0	0	0	0	0	0	0	0
4930529L06Rik	0	0	0	0	0	0	0	0	0	0	0	0	0	0	0	0	0	0	0	0	0	0	0	0
4930529M08Rik	0	0	0	0	0	0	0	0	0	0	0	0	0	0	0	0	0	0	0	0	0	0	0	0
4930532M18Rik	0	0	0	0	0	0	0	0	0	0	0	0	0	0	0	0	0	0	0	0	0	0	0	0
4930533B01Rik	0	0	0	0	0	0	0	0	0	0	0	0	0	0	0	0	0	0	0	0	0	0	0	0
4930533P14Rik	0	0	0	0	0	0	0	0	0	0	0	0	0	0	0	0	0	0	0	0	0	0	0	0
4930538K18Rik	0.204376	0	0	0.575156	0.179819	0	0	0	0	0	0	0	0	0	0	0	0	0	0	0	0	0	0	0
4930539C22Rik	0	0	0	0	0	0	0	0	0	0	0	0	0	0	0	0	0	0	0	0	0	0	0	0
4930539E08Rik	3.43794	3.23067	1.42003	1.37737	3.52962	2.38764	0.332596	0	3.46714	3.4745	1.59188	0.482464	5.12623	0.983566	1.30155	3.46984	3.37169	1.67534	4.07476	3.91059	5.32404	3.73833	1.27389	6.37473
4930539J05Rik	2.7881	5.90078	5.56227	0.814208	13.5655	0	2.28789	24.9252	2.53383	7.07039	5.32646	1.46647	12.5723	0	7.50523	0.64125	1.56543	4.90787	9.91467	5.21529	9.97793	4.13203	5.50673	0
4930539M17Rik	0	0	0	0	0	0	0	0	0	0	0	0	0	0	0	0	0	0	0	0	0	0	0	0
4930539N22Rik	0	0	0	0	0	0	0	0	0	0.300016	0	0	0	0	0	0	0	0	0	0	0	0	0	0
4930540M03Rik	0	0	0	0	0	0	0	0	0	0	0	0	0	0	0	0	0	0	0	0	0	0	0	0
4930542C21Rik	0	0	0	0	0	0	0	0	0	0	0	0	0	0	0	0	0	0	0	0	0	0	0	0
4930542D17Rik	0	0	0	0	0	0	0	0	0	0	0	0	0	0	0	0	0	0	0	0	0	0	0	0
4930543E12Rik	0	0	0.213985	0	0	0	0	0	0	0	0	0	0	0	0	0	0	0	0	0	0	0	0	0
4930544D05Rik	0	0	0	0	0	0	0	0	0	0	0	0	0	0	0	0	0.514673	0	0	0	0	0	0	0
4930544G11Rik	0	0	0	0	0	0	0	0	0	0	0	0	0	0	0	0	0	0	0	0	0	0	0	0
4930544M13Rik	0	0	0	0	0	0	0	0	0	0	0	0	0	0	0	0	0	0	0	0	0	0	0	0
4930545E07Rik	0	0	0	0	0	0	0	0	0	0	0	0	0	0	0	0	0	0	0	0	0	0	0	0
4930545H06Rik	0	0	0	0	0	0	0	0	0	0	0	0	0	0	0	0	0	0	0	0	0	0	0	0
4930545L23Rik	0	0	0	0	0	0	0	0	0	0	0	0	0	0	0	0	0	0	0	0	0	0	0	0
4930546C10Rik	0	0	0	0	0	0	0	0	0	0	0	0	0	0	0	0	0	0	0	0	0	0	0.109926	0
4930546K05Rik	0	0	0	0	0	0	0	0	0	0	0	0	0	0	0	0	0	0	0	0	0	0	0	0
4930547E08Rik	0	0	0	0	0	0	1.00362	0	0	0	0	0	0	0	0	0	0	0	0	0	0	0	0	0
4930547E14Rik	0	0	0	0	0	0	0	0	0	0	0	0	0	0	0	0	0	0	0	0	0	0	0	0
4930548G14Rik	0	0	0	0	0	0	0	0	0	0	0	0	0	0	0	0	0	0	0	0	0	0	0	0
4930548H24Rik	0	0.628987	0.64408	0	0.384204	0	0	0	0.310478	0.214957	0	0	0	0	0.22346	0	0	0	0.461565	0	0.262942	0	0.190619	0
4930548J01Rik	0	0	0	0	0	0	0	0	0	0	0	0	0	0	0	0	0	0	0	0	0	0	0	0
4930548K13Rik	0	0	0	0	0	0	0	0	0	0	0	0	0	0	0	0	0	0	0	0	0	0	0	0
4930549C01Rik	0	0	0	0	0	0	0	0	0	0	0	0	0	0	0	0	0	0	0	0	0	0	0	0
4930549G23Rik	0	0.662187	0	0	0.702831	0	0	0	0	0.743101	0	0	1.10417	0	0	0	0	0.843112	0	0	0	0	0	0
4930550C14Rik	0.513833	0.246082	0	0	0.226654	0	0	0	0	0.25262	0	0	0.309165	5.13012	0	0	0.450442	0	0.27189	0	0	0	0	0
4930550L24Rik	0	0	0	0	0	0	0	0	0	0	0	0	0	0	0	0	0	0	0	0	0	0	0	0
4930552N02Rik	0	0	0	0	0	0	0	0	0	0	0	0	0	0	0	0	0	0	0	0	0	0	0	0
4930552P12Rik	0	0	0	0	0	0	0	0	0	0	0	0.204377	0	0	0.118968	0	0.102496	0	0	0	0	0	0	0
4930553E22Rik	0	0	0	0	0	0	0	0	0	0	0	0	0	0	0	0	0	0	0	0	0	0	0	0
4930554C24Rik	0	0	0	0	0	0	0	0	0	0	0	0	0	0	0	0	0	0	0	0	0	0	0	0
4930555B11Rik	0	0	0	0	0	0	0	0	0	0	0	0	0	0	0	0	0	0	0	0	0	0	0	0
4930555G01Rik	0	0	0	0	0	0	0	0	0	0	0	0	0	0	0	0	0	0	0	0	0	0	0	0
4930556C24Rik	0	0	0	0	0	0	0	0	0	0	0	0	0	0	0	0	0	0	0	0	0	0	0	0
4930556G01Rik	0	0	0	0	0	0	0	0	0	0	0	0	0	0	0	0	0	0	0	0	0	0	0	0
4930556J02Rik	0	0	0	0	0	0	0	0	0	0	0	0	0	0	0	0	0	0	0	0	0	0	0	0
4930556M19Rik	0	0.143033	0	0	0	0	0	0	0	0.146303	0	0	0	0	0	0	0.522336	0	0	0	0	0	0	0
4930556N09Rik	0	0	0	0	0	0	0	0	0	0	0	0	0	0	0	0	0	0	0	0	0	0	0	0
4930557A04Rik	0	0	0	0	0	0	0	0	0	0	0	0	0	0	0	0	0	0	0	0	0	0	0	0
4930557J02Rik	0	0	0	0	0	0	0	0	0	0	0	0	0	0	0	0	0	0	0	0	0	0	0	0
4930558C23Rik	0	0	0	0	0	0	0	0	0	0	0	0	0	0	0	0	0	0	0	0	0	0	0	0
4930558G05Rik	0	0	0	0	0	0	0	0	0	0	0	0	0	0	0	0	0	0	0	0	0	0	0	0
4930558J18Rik	2.87733	1.25207	2.40314	2.03644	2.77621	8.51017	2.15666	3.57748	2.67377	2.7033	1.81586	2.14751	2.88735	9.65253	3.68941	0	1.90497	1.48481	2.43247	1.89693	3.77183	5.24686	1.51345	0
4930558K02Rik	0	0	0	0	0.304054	0	0	0	0	0	0	0	0.838172	0	0	0	0	0.369835	0	0	0	0	0	0
4930562C15Rik	0	0	0	0	0	0	0	0	0	0	0	0	0	0	0	0	0	0	0	0	0	0	0	0
4930562F07Rik	0	0	0	0	0	0	0	0	0	0	0	0.125644	0	0	0	0	0.639214	0.431137	0	0	0	0	0	0
4930563D23Rik	0	0	0	0	0	0	0	0	0	0	0	0	0	0	0	0	0	0	0	0	0	0	0.0943495	0
4930563E18Rik	0	0	0	0	0	0	0	0	0	0	0	0	0	0	0	0	0	0	0	0	0	0	0	0
4930563E22Rik	0.0877435	0	0.167757	0.405578	0.0747405	0	0	1.39077	0.126593	0.436387	0	0.231669	0.299747	0	1.40437	2.10717	0.38918	0.105268	0.270729	0.605343	0.311973	0	0.466547	0
4930563F08Rik	0	0	0	0	0	0	0	0	0	0	0	0	0	0	0	0	0	0	0	0	0	0	0	0
4930563M20Rik	0	0	0	0	0	0	0	0	0	0	0	0	0	0	0	0	0	0	0	0	0	0	0	0
4930564B18Rik	0	0	0	0	0	0	0	0	0	0	0	0	0	0	0	0	0	0	0	0	0	0	0	0
4930564C03Rik	0	0	0	0	0	0	0	0	0	0	0	0	0	0	0	0	0	0	0	0	0	0	0	0
4930564D02Rik	0	0	0	0	0	0	0	0	0	0	0	0	0	0	0	0	0	0	0	0	0	0	0	0
4930565D16Rik	0	0	0	0	0	0	0	0	0	0	0	0	0	0	0	0	0	0	0	0	0	0	0	0
4930565N06Rik	0.360509	0.582185	0.47209	0	0.736953	0	0.1643	0.874753	0.172051	0.237975	0.275779	0.423517	0.141307	0	0.12333	0	0.106235	0	0.380846	0	0.142699	0	0.316385	0
4930567H12Rik	0	0	0	0	0.316142	0	0	0	0	0	0	0	0	0	0	0	0	0	0	0	0	0	0	0
4930567H17Rik	0	0	0	0	0	0	0	0	0	0	0	0	0	0	0	0	0	0	0	0	0	0	0	0
4930567J20Rik	0	0	0	0	0	0	0	0	0	0	0	0	0	0	0	0	0	0	0	0	0	0	0	0
4930567K20Rik	0	0	0	0	0	0	0	0	0	0	0	0	0	0	0	0	0	0	0	0	0	0	0	0
4930568D16Rik	0	0	0	0	0	0	0	0	0	0	0	0	0	0	0	0	0	0	0	0	0	0	0	0
4930568E12Rik	0	0	0	0	0	0	0	0	0	0	0	0	0	0	0	0	0	0	0	0	0	0	0	0
4930568G15Rik	0	0	0	0	0	0	0	0	0	0	0	0	0	0	0	0	0	0	0	0	0	0	0	0
4930570G19Rik	0	0	0	0	0	0	0	0	0	0	0	0	0	0	0	0	0	0	0	0	0	0	0	0
4930571K23Rik	0	0	0	0	0	0	0	0	0	0	0	0	0	0	0	0	0	0	0	0	0	0	0	0
4930571O06Rik	0	0	0	0	0	0	0	0	0	0	0	0	0	0	0	0	0	0	0	0	0	0	0	0
4930572K03Rik	0	0	0	0	0	0	0	0	0	0	0	0	0	0	0	0	0	0	0	0	0	0	0	0
4930572O03Rik	0	0	0	0	0	0	0	0	0	0	0	0	0	0	0	0	0.242345	0	0	0	0	0	0	0
4930572O13Rik	0	0	0	0	0	0	0	0	0	0	0	0	0	0	0	0	0	0	0	0	0	0	0	0
4930573O16Rik	0	0	0	0	0	0	0	0	0	0	0	0	0	0	0	0	0	0	0	0	0	0	0	0
4930577N17Rik	1.25745	2.01763	4.31493	2.40501	1.09234	0	1.91151	0	2.15515	1.98436	3.97433	2.71805	1.9574	7.43181	2.76448	5.24001	2.51029	2.74405	3.34401	4.99766	2.78889	6.57687	1.75961	3.868
4930578C19Rik	0	0	0	0	0	0	0	0	0	0	0.191257	0	0	0	0	0	0	0	0	0	0	0	0	0
4930578E11Rik	0	0	0	0	0	0	0	0	0	0	0	0	0	0	0	0	0	0	0	0	0	0	0	0
4930578I06Rik	0	0	0	0	0	0	0	0	0	0	0	0	0	0	0	0	0	0	0	0	0	0	0	0
4930578M01Rik	0	0.360818	0	0	0	0	0	0	0	0	0	0	0	0	0.388496	0	0	0	0.403439	0	0.940574	0	0.330073	0
4930578N18Rik	0	0	0	0	0	0	0	0	0	0	0	0	0	0	0	0	0	0	0	0	0	0	0	0
4930579F01Rik	0	0	0	0	0	0	0	0	0	0	0	0	0	0	0	0	0	0	0	0	0	0	0	0
4930579G18Rik	2.75027	3.45799	6.24448	6.34616	2.60691	27.191	3.14226	6.7251	2.40942	3.12757	3.15558	6.25479	2.77888	0	6.50119	4.27698	7.2533	3.1306	4.47515	6.45491	3.31149	7.73927	3.69777	0
4930579G24Rik	33.3338	16.3259	29.645	24.0381	29.9105	34.9912	15.607	10.6155	27.5888	22.3671	30.287	23.9475	29.7719	22.9762	21.1936	20.5106	21.1612	24.888	30.1272	18.9433	29.3294	24.5998	16.2587	5.91212
4930579K19Rik	0	0.269909	1.66936	2.62894	1.49674	0	1.51069	0	0	0.831939	0.323992	0.243097	0.341309	0	0.288837	0	1.23585	0.637972	1.49476	1.46438	0.687353	1.82891	0.245996	0
4930581F22Rik	1.3285	2.45732	1.42339	1.48499	2.43364	0.183375	0.825552	2.5116	0.691629	1.07623	1.52439	2.23442	1.84639	0.437908	2.10709	0	1.28117	0.833083	1.65863	3.93919	1.14742	5.95297	3.07365	0
4930583K01Rik	0	0	0	0	0	0	0	0	0.556522	0.386055	0	0	0	0	0	0	0	0	0	0	0	0	0	0
4930583P06Rik	0	0	0	0	0	0	0	0	0	0	0	0	0	0	0	0	0	0	0	0	0	0	0	0
4930584F24Rik	0	0	0	0	0	0	0	0	0	0	0	0	0	0	0	0	0	0	0	0	0	0	0	0
4930590J08Rik	0	0	0	0	0	0	0	0	0	0	0	0	0.0967187	0	0	0	0.073337	0	0	0	0	0	0	0
4930590L20Rik	0	0	0	0	0	0	0	0	0	0	0	0	0	0	0	0	0	0	0	0	0	0	0	0
4930591A17Rik	0	0	0	0	0	0	0	0	0	0	0	0	0	0	0	0	0	0	0	0	0	0	0	0
4930592A05Rik	0	0	0	0	0	0	0	0	0.469637	0	0	0	0	0	0	0	0	0	0	0	0	0	0	0
4930592I03Rik	0.341804	0	0	0	0	0	0	0	0.482691	0	0	0	0	0	0	0	0	0	0	0	0	0	0	0
4930593A02Rik	0	0	0	0	0	0	0	0	0	0	0	0	0	0	0	0	0	0	0	0	0	0	0	0
4930593C16Rik	0	0	0	0	0	0	0	0	0	0	0	0	0	0	0	0	0	0	0	0	0	0	0	0
4930594C11Rik	0.312693	0.809041	0.511684	0.691222	0.63869	0	0.428463	1.62986	0.448138	0.61974	0.598011	1.28868	0.611198	0	0.321023	0	0.922355	0.960388	0.550441	0.920711	0.864346	0	0.732327	0
4930595M18Rik	0	0	0	0	0	0	0	0	0	0	0	0	0	0	0	0	0	0	0	0	0	0	0	0
4930596D02Rik	0	0	0	0	0	0	0	0	0	0	0	0	0	0	0	0	0	0	0	0	0	0	0	0
4930596I21Rik	0	0	0	0	0	0	0	0	0	0	0	0	0	0	0	0	0	0	0	0	0	0	0	0
4930597G03Rik	0	0	0	0	0	0	0	0	0	0	0	0	0	0	0	0	0	0	0	0	0	0	0	0
4930598F16Rik	0	0	0	0	0	0	0	0	0	0	0	0	0	0	0	0	0	0	0	0	0	0	0.415813	0
4930599N23Rik	0	0	0	0	0	0	0	0	0	0	0	0.375422	0	0	0	0	0	0	0	0	0	0	0	12.9767
4931402G19Rik	0.55367	0	0	0	0.113352	0	0	0	0.195583	0.132659	0	0.227588	0.152305	0	0.132699	0	0.34279	0	0.30526	0	0	0	0.226896	0
4931403E22Rik	0	0	0	0	0	0	0	0	0	0	0.664976	0	0	0	1.17861	0	0.498362	0	0.616094	0	0.739084	0	0	0
4931403G20Rik	0	0	0	0	0	0	0	0	0	0	0	0	0	0	0	0	0	0	0	0	0	0	0	0
4931406B18Rik	0	0	0	0	0	0	0	0	0	0	0	0	0	0	0	0	0	0	0	0	0	0	0	0
4931406C07Rik	2.30813	3.4893	4.21196	4.16426	4.71754	5.35174	4.41155	2.4046	3.78199	3.70544	3.53382	3.761	4.77769	0	4.96512	1.48049	4.04408	3.70853	4.07271	3.94526	4.17304	12.9002	5.60106	5.13838
4931406H21Rik	0	0	0	0	0	0	0	0	0	0.0721402	0	0	0	0	0	0	0.0644411	0	0	0	0	0	0	0
4931406P16Rik	12.7554	11.5149	10.8881	12.6929	12.6593	16.0497	13.5058	15.1048	12.6382	14.2737	11.9808	10.0965	13.9405	11.3832	12.5282	14.4538	11.705	10.075	11.7172	10.675	11.7092	8.27455	14.0607	17.7849
4931408C20Rik	0	0	0	0	0	0	0	0	0	0	0	0	0	0	0	0	0	0	0	0	0	0	0	0
4931408D14Rik	0	0.0904194	0	0	0	0	0	0	0	0	0	0	0	0	0	0	0	0.107369	0	0	0	0	0	0
4931409K22Rik	0.107047	0.0868354	0.0877353	0	0	0	0	0	0	0	0	0	0	0	0	0	0	0.123254	0	0	0	0	0	0
4931412M21	0	0	0	0	0	0	0	0	0	0	0	0	0	0	0	0	0	0	0	0	0	0	0	0
4931414P19Rik	4.79118	5.18602	3.93888	4.11389	4.00048	9.6473	4.72826	1.97244	4.14999	5.29807	4.85846	4.32508	4.70991	13.735	5.37557	0.882057	6.11047	6.7962	3.53086	6.68688	4.49275	3.819	6.35861	6.59214
4931417E11Rik	0	0.286937	0	0	0	0	0	0	0	0	0	0	0	0	0	0	0	0	0	0	0	0	0	0
4931419H13Rik	0	0	0	0	0	0	0	0	0	0	0	0	0	0	0	0	0	0	0	0	0	0	0	0
4931420L22Rik	0	0	0	0	0	0	0	0	0	0	0	0	0	0	0	0	0	0	0	0	0	0	0	0
4931423N10Rik	0	0	0	0	0	0	0	0	0	0	0	0	0	0	0	0	0	0	0	0	0	0	0	0
4931428F04Rik	5.74959	7.24893	4.5843	9.12295	5.97145	0.000115491	6.34591	1.97114	6.83848	5.96907	4.12514	5.65145	10.8199	8.30419	8.0983	6.55491	9.63134	4.27119	5.50361	9.07693	6.89881	4.61437	8.90245	3.18138
4931428L18Rik	0	0	0	0	0	0	0	0	0	0	0	0	0	0	0	0	0	0	0	0	0	0	0	0
4931429I11Rik	0	0	0	0	0	0	0	0	0	0	0	0	0	0	0	0	0	0	0	0	0	0	0	0
4931429L15Rik	0	0	0	0.544802	0	0	0	0	0	0	0	0	0	0	0	0	0	0	0	0	0	0	0	0
4931429P17Rik	0	0	0	0	0	0	0	0	0	0	0	0	0	0	0	0	0	0	0	0	0	0	0	0
4931430N09Rik	0	0	0	0	0	0	0	0	0	0.134061	0	0.238224	0	0	0	0	0	0	0	0	0.161245	0	0.119011	0
4931431B13Rik	0	0	0	0	0	0	0	0	0	0	0	0	1.3914	0	0	0	0	0	0	0	0	0	0	0
4931431C16Rik	0.214468	0.1027	0.103027	0.0994042	0.092948	0	0	0	0.302504	0.105434	0	0.467944	0	0	0.107965	2.41181	0.0947937	0.122284	0.110831	0	0.130515	0.224719	0.276463	0
4931431F19Rik	0	0	0	0	0	0	0	0	0	0	0	0	0	0	0	0	0	0	0	0	0	0	0	0
4931440F15Rik	0	0	0.0849493	0	0	0	0.118886	0	0	0	0	0	0	0	0	0	0	0	0	0	0	0	0	0
4931440J10Rik	0	0	0.382923	0	0	0	0	0	0	0	0	0	0	0	0	0	0	0	0	0	0	0	0	0
4931440L10Rik	0	0.204523	0	0	0	0	0	0	0	0	0	0	0	0	0	0	0	0	0	0	0	0	0	0
4931440P22Rik	0.160913	0.310755	0.790814	1.51594	0.282531	0	0	0	0.229799	0.317996	0.379232	2.86461	0	0	0	0	0.425688	0.368362	1.05709	1.41149	0.384504	0	0.140954	4.80579
4932411E22Rik	0	0	0	0	0	0	0	0	0	0	0	0	0	0	0	0	0	0	0	0	0	0	0	0
4932411N23Rik	0	0	0	0	0	0	0	0	0.119144	0	0	0	0	0	0	0	0	0	0	0	0	0	0	0
4932412D23Rik	0	0.0661935	0	0	0	0	0	0	0	0	0	0	0	0	0	0	0	0	0	0	0	0	0	0
4932413F04Rik	0	0	0	0	0	0	0	0	0	0	0	0	0	0	0	0	0	0	0	0	0	0	0	0
4932414J04Rik	0	0	0	0	0	0	0	0	0	0	0	0	0	0	0	0	0	0	0	0	0	0	0	0
4932414N04Rik	0	0	0	0	0	0	0	0	0	0	0	0	0	0	0	0	0	0	0	0	0	0	0	0
4932415M13Rik	0	0	0	0	0	0	0	0	0	0	0	0	0	0	0	0	0	0	0	0	0	0	0	0
4932416H05Rik	1.57703	1.10901	0.563717	1.38518	0.420135	0	0.531575	0	1.01641	0.868688	0.468423	1.75543	0.646465	0	1.1802	1.31636	1.15269	0.587923	0.795384	3.24716	0.770058	0	0.922443	2.39879
4932416K20Rik	0	0	0	0	0	0	0	0	0	0	0	0	0	0	0	0	0	0	0	0	0	0	0	0
4932418E24Rik	0	0	0	0	0	0	0	0	0	0	0	0	0	0	0	0	0	0	0	0	0	0	0	0
4932429P05Rik	0	0	0	0	0	0	0	0	0	0	0	0	0	0	0	0	0	0	0	0	0	0	0	0
4932435O22Rik	0	0	0	0	0	0	0	0	0	0	0	0	0	0	0	0	0	0	0	0	0	0	0	0
4932438A13Rik	6.77465	4.89687	7.90897	8.90004	7.67693	13.7462	6.87805	7.51456	6.32261	6.76045	6.15385	7.75893	7.09276	10.1388	7.33101	6.5124	4.18791	4.71155	5.83489	7.67112	7.43086	5.19945	8.25671	7.51105
4932438H23Rik	0.595697	0.727559	1.1701	0.338105	0.521853	0	0.162904	0	0.68235	0.353916	0.683541	1.46984	0.280137	0	0.489097	0	0.737322	0.684974	1.88791	3.78175	0.565816	1.27655	0.31368	0
4932441J04Rik	0	0	0	0	0	0	0	0	0	0	0	0	0	0	0	0	0	0	0	0	0	0	0	0
4932443I19Rik	0	0	0	0	0	0	0	0	0	0	0	0	0	0	0	0	0	0	0	0	0	0	0	0
4932702P03Rik	0	0	0	5.25539	0	0	0.00429435	0	0	0	0	0	0.0357277	0	0.814676	0	0.194897	1.38947	1.43747	0	0	0.503797	0	0
4933400A11Rik	0	0	0	0	0	0	0	0	0	0	0	0	0	0	0	0	0	0	0	0	0	0	0	0
4933400B14Rik	0	0	0	0	0	0	0	0	0	0	0	0	0	0	0	0	0	0	0	0	0	0	0	0
4933400C23Rik	0	0	0	0	0	0	0	0	0	0	0	0	0	0	0	0	0	0	0	0	0	0	0	0
4933400F21Rik	0	0	0	0	0	0	0	0	0	0	0	0	0	0	0	0	0	0	0	0	0	0	0	0
4933400L20Rik	0	0	0	0	0	0	0	0	0	0	0	0	0	0	0	0	0	0	0	0	0	0	0	0
4933401B06Rik	0	0	0	0	0	0	0	0	0	0	0	0	0	0	0	0	0	0	0	0	0	0	0	0
4933401D09Rik	0	0	0	0	0	0	0	0	0	0	0	0	0	0	0	0	0	0	0	0	0	0	0	0
4933401H06Rik	0	0	0	0	0	0	0	0	0	0	0	0	0	0	0	0	0	0	0	0	0	0	0	0
4933402C06Rik	0	0	0	0	0	0	0	0	0	0	0	0	0	0	0	0	0	0	0	0	0	0	0	0
4933402D24Rik	0.171544	0	0.168648	0	0.301361	0	0	0	0.48964	0	0.590494	0.300055	0.203463	0	0.175865	0	0.302344	0	0.181342	0	0.205283	0	0	0
4933402E13Rik	0	0	0	0	0	0	0	0	0	0	0	0	0	0	0	0	0	0	0	0	0	0	0	0
4933402J07Rik	0	0	0	0	0	0	0	0	0	0	0	0	0	0	0	0	0	0	0	0	0	0	0	0
4933402J10Rik	0	0	0	0	0	0	0	0	0	0	0	0	0	0	0	0	0	0	0	0	0	0	0	0
4933402J15Rik	0	0	0	0	0	0	0	0	0	0	0	0	0	0	0	0	0	0	0	0	0	0	0	0
4933402N03Rik	0	0	0	0	0	0	0	0	0	0	0	0	0	0	0	0	0	0	0	0	0	0	0	0
4933402N22Rik	0	0	0	0	0	0	0	0	0	0	0	0	0	0	0	0	0	0	0	0	0	0	0	0
4933402P03Rik	0	0	0	0	0	0	0	0	0	0	0	0	0	0	0	0	0	0	0	0	0	0	0	0
4933403O08Rik	0	0	0	0	0	0	0	0	0	0	0	0	0	0	0	0	0	0	0	0	0	0	0	0
4933404G15Rik	0	0	0	0	0	0	0	0	0	0	0	0	0	0	0	0	0	0	0	0	0	0	0	0
4933404K08Rik	0	0	0	0	0	0	0	0	0	0	0	0	0	0	0	0	0	0	0	0	0	0	0	0
4933404O12Rik	23.5323	17.8933	40.7868	37.9734	23.3967	29.808	30.2618	29.9029	20.6424	20.0731	39.1308	33.2648	20.2953	11.2352	27.8679	29.0508	23.3668	20.6072	39.7949	34.3114	19.7654	22.447	32.5365	22.1563
4933405D12Rik	0	0	0	0	0	0	0	0	0	0	0	0	0	0	0	0	0	0	0	0	0	0	0	0
4933405E24Rik	0	0	0	0	0	0	0	0	0	0	0	0	0	0	0	0	0	0	0	0	0	0	0	0
4933405L10Rik	0.290129	0.277122	0	0.269891	0	0	0	0	0	0	0	0	0	0	0	0	0	0.327449	0	0	0.353508	0	0.252644	0
4933405O20Rik	0	0	0	0	0	0	0	0	0	0	0	0	0	0	0	0	0	0	0	0	0	0	0	0
4933406C10Rik	0.186002	0.179224	0	0	0	0	0.756078	0	0.265215	0	0.213418	0	0.22115	0	0	0	0	0	0	0	0.22307	0	0.813719	0
4933406D12Rik	0	0	0	0	0	0	0	0	0	0	0	0	0	0	0	0	0	0	0	0	0	0	0	0
4933406F09Rik	0	0	0	0	0	0	0	0	0	0	0	0	0	0	0	0	0	0	0	0	0	0	0	0
4933406G16Rik	0	0	0	0	0	0	0	0	0	0	0	0	0	0	0	0	0	0	0	0	0	0	0	0
4933406I18Rik	0	1.44932	0.377328	0	0.678784	0	1.0089	0	0.538451	0	0.438504	0.324451	0	0	0.390164	0	0	0.427155	0.405163	0	0	0	1.3259	0
4933406J08Rik	0	0	0	0	0	0	0	0	0	0	0	0	0	0	0	0	0	0	0	0	0	0	0	0
4933406J10Rik	0	0	0	0	0	0	0	0	0	0	0	0	0	0	0	0	0	0	0	0	0	0	0	0
4933406K04Rik	0	0	0	0	0	0	0	0	0	0	0	0	0	0	0	0	0	0	0	0	0	0	0	0
4933406M09Rik	0	0	0	0	0	0	0	0	0	0	0	0	0	0	0	0	0	0	0	0	0	0	0	0
4933407E24Rik	0	0	0	0	0	0	0	0	0	0	0	0	0	0	0	0	0	0	0	0	0	0	0	0
4933407G14Rik	0	0	0	0	0	0	0	0	0	0	0	0	0	0	0	0	0	0	0	0	0	0	0	0
4933407I05Rik	0	0	0	0	0	0	0	0	0	0	0	0	0	0	0	0	0	0	0	0	0	0	0	0
4933407K13Rik	4.76223	2.43615	3.19787	1.26902	1.82648	0	1.95173	3.40766	1.79838	2.98374	1.72567	1.85013	1.36705	6.208	3.77567	3.3237	2.88707	2.12182	2.11727	3.55155	3.15748	0.714998	4.11297	4.70363
4933407L21Rik	0	1.08189	0.278825	0.790321	0	0	0	0	0	0	0	0.243596	0	0	0.28945	0	0.247689	0	0	2.44566	0	0	0	0
4933408B17Rik	0	0	0.604126	0.581632	0	0	0.336253	0	0	0	0	0	0.289447	0	0.126244	1.16616	0.326198	0.141392	0.129961	1.7346	0.146142	0.790982	0.107946	1.14705
4933408J17Rik	0	0	0.323965	0.761528	0.141092	0	0.218519	0	0	0	0.381351	0.428339	0	0	0.164803	0	0	0	0.695662	1.69177	0	0	0	0
4933408N05Rik	0	0	0	0	0	0	0	0	0	0	0	0	0	0	0	0	0	0	0	0	0	0	0	0
4933409G03Rik	0	0	0	0	0	0	0	0	0	0	0	0	0	0	0	0	0	0	0	0	0	0	0	0
4933409K07Rik	0	0	0	0	0	0	0	0	0	0	0	0	0	0	0	0	0	0	0	0	0	0	0	0
4933411E08Rik	0	0	0	0	0.155875	0	0	0	0	0	0.40711	0	0	0	0	0	0	0	0	0	0	0	0	0
4933411G06Rik	0	0	0	0	0	0	0	0	0	0	0	0	0	0	0	0	0	0	0	0	0	0	0	0
4933411G11Rik	0	0	0	0	0	0	0.185211	0	0	0	0	0	0	0	0	0	0	0	0	0	0	0	0	0
4933411K16Rik	0.223146	0.214343	0	0	0	0	0	0	0	0.219792	0	0	0	0	0	0	0.392045	0	0	0	0	0	0	0
4933411K20Rik	16.6448	12.0816	18.9196	14.083	16.8458	18.702	15.3233	14.3736	15.6221	14.2128	15.999	13.7543	19.0964	7.7902	17.9871	5.20092	12.534	10.3771	16.4034	13.4178	19.3763	12.7338	16.6469	10.1533
4933412E12Rik	2.24077	1.76557	3.0088	4.39953	2.87037	0	4.77331	0	1.45206	1.00516	1.87162	1.775	2.18851	0	2.71566	0	2.6897	1.85834	2.37203	0	1.88645	0	5.52605	4.17157
4933412E24Rik	0	0	0	0	0	0	0	0	0	0	0	0	0	0	0	0	0	0	0	0	0	0	0	0
4933412O06Rik	0	0	0	0	0	0	0	0	0	0	0	0	0	0	0	0	0	0	0	0	0	0	0	0
4933413G19Rik	0.301011	0	0	0	0.266155	0	0.401564	0	0	0	0	0	0	0	0.307758	0	0.526329	0	0	0	0	0	0.26199	0
4933413J09Rik	0	0.161903	0.163477	0	0	0	0	0	0	0.082622	0.0955691	0	0.0973355	0	0	0	0.0737959	0	0.175883	0.958883	0	0	0.0732158	0
4933413L06Rik	0	0	0	0	0	0	0	0	0	0	0	0	0	0	0	0	0	0	0	0	0	0	0	0
4933415F23Rik	0.169134	0	0	0	0	0	0	0	0	0	0	0	0	0	0	0	0	0	0	0	0	0	0	0
4933416C03Rik	0	0	0	0	0	0	0	0	0	0	0	0	0	0	0	0	0	0	0	0	0	0	0	0
4933416E03Rik	0	0	0	0	0	0	0	0	0	0	0	0	0	0	0	0	0	0	0	0	0	0	0	0
4933416I08Rik	0	0	0	0	0	0	0	0	0	0	0	0	0	0	0	0	0	0	0	0	0	0	0	0
4933416M06Rik	0	0	0	0	0	0	0	0	0	0	0	0	0	0	0	0	0	0	0	0	0	0	0	0
4933416M07Rik	0	0.262644	0.272636	0	0.683871	0	0	0	0	0	0	0	0	5.34116	0	0	0	0	0	2.83856	0	0	0.207948	0.156387
4933417A18Rik	0	0	0	0	0	0	0	0	0	0	0	0	0	0	0	0	0	0	0	0	0	0	0	0
4933417D19Rik	0	0.498793	0	0	0	0	1.39744	0	0	0.256053	0.298825	0.899635	0	0	0	0	0.228273	0	0.275646	3.83691	0.947737	0	0	2.90497
4933417E11Rik	0	0	0	0	0	0	0	0	0	0	0	0	0	0	0	0	0	0	0	0	0	0	0	0
4933417G07Rik	0	0	0	0	0	0	0	0	0	0	0	0	0	0	0	0	0	0	0	0	0	0	0	0
4933417O13Rik	0	0	0	0	0	0	0	0	0	0	0	0	0	0	0	0	0	0	0	0	0	0	0	0
4933421I07Rik	0	0	0	0	0	0	0	0	0	0	0	0	0	0	0	0	0	0	0	0	0	0	0	0
4933421O10Rik	0.728195	1.06263	1.5005	2.62971	0.954648	0	1.30278	0	1.35937	0.867343	1.00273	1.80889	1.44427	0	1.42137	0	1.48499	0.925777	1.46073	0.387453	1.20209	1.55721	1.02474	0
4933422A05Rik	0.231131	0	0	0	0.203637	0	0	0	0	0	0	0	0.276915	0	0.473314	0	0.202937	0	0.24452	0	0.279095	0	0	0
4933422H20Rik	0	0	0	0	0	0	0	0	0	0.151773	0	0	0	0	0	0	0	0	0	0	0	0	0	0
4933424G05Rik	0	0.332902	0	0	0	0	0	0	0	0	0	0	0.204731	0	0	0	0	0	0	0	0.413036	0	0	0
4933424G06Rik	0	0	0	0	0	0	0	0	0	0	0	0	0	0	0	0	0	0	0	0	0	0	0	0
4933425B07Rik	0	0	0	0	0	0	0	0	0	0	0	0	0	0	0	0	0	0	0	0	0	0	0	0
4933425L06Rik	0	0	0	0	0	0	0	0	0.194274	0.13438	0	0	0	0	0	0	0	0	0	0	0	0	0	0
4933426M11Rik	12.1562	17.2813	12.9538	17.096	14.2819	6.14283	17.38	26.9897	11.4384	12.2964	13.8227	14.5966	15.1054	13.7156	23.4526	22.6256	15.4492	10.3658	14.406	26.2233	14.5565	22.9053	27.5291	27.6614
4933427D06Rik	0	0	0	0	0.0962291	0.166945	0	0	0	0	0.126103	0	0	0	0	0	0	0	0	0	0.130301	0	0	0
4933427D14Rik	8.5805	8.04205	8.66926	11.3895	6.6568	6.62848	7.67602	8.86657	9.47615	8.83853	8.59708	9.04415	9.47393	7.88986	6.71108	11.2995	10.7931	8.22278	8.8552	10.8577	9.95354	5.88579	7.94419	10.1121
4933427E11Rik	0.264883	0.253543	0.260885	0	0	0	0.355088	0	0	0	0.607811	0.685767	0	0	0	0	0.464182	0	0.841047	0	0.321501	0	0.461851	0
4933427E13Rik	0	0	0	0	0	0	0	0	0	0	0	0	0	0	0	0	0	0	0	0	0	0	0	0
4933427G17Rik	0.158032	0	0.310645	0	0	0	0	0	0	0	0	0	0	0	0	0	0	0	0	0	0.377457	0	0	0
4933427I22Rik	0	0	0	0	0	0	0	0	0	0	0	0	0	0	0	0	0.199504	0	0	0	0	0	0.198386	0
4933428C19Rik	0	0	0	0	0	0	0	0	0	0	0	0	0	0	0	0	0	0	0	0	0	0	0	0
4933428G20Rik	0	0	0	0	0	0	0	0	0	0	0	0	0	0.396243	0	0	0	0	0	0	0	0	0	0
4933429K18Rik	0	0	0	0	0	0	0.43838	0	0	0	0	0	0.40198	0	0	0	0.287897	0.370724	0	0	0.404413	0	0.286741	0
4933429O19Rik	0	0	0	0	0	0	0	0	0	0	0	0	0	0	0	0	0	0	0	0	0	0	0	0
4933430H16Rik	0	0	0	0	0	0	0	0	0	0.212362	0	0	0	0	0	0	0	0	0	0	0	0	0	0
4933430I17Rik	1.33854	0.807372	1.31583	1.57528	1.02855	0	0.909151	0	0.716551	0.495818	0.575946	1.02494	0.793235	0	0.686189	0	0.294972	0.956889	0.530591	1.31986	0.800389	1.43731	0.586084	0
4933430M04Rik	0	0	0	0	0	0	0	0	0	0	0	0	0	0	0	0	0	0	0	0	0	0	0	0
4933430N04Rik	0	0	0	0	0	0	0	0	0	0	0	0	0	0	0	0	0	0	0	0	0	0	0	0
4933431E20Rik	0.254899	0	0.0500016	0.340785	0.222532	3.18375	0	1.76836	0.122103	0.311953	0.0585006	0.862073	0.23705	3.50979	0	0.734453	0.419342	0.885943	0.0538077	0.181326	0.23967	0.217822	0	0
4933431G14Rik	0	0	0	0	0	0	0	0	0	0	0	0	0	0	0.257209	0	0	0	0	0	0	0	0	0
4933432G23Rik	0	0	0	0	0	0	0	0	0	0	0	0	0	0	0	0	0	0	0	0	0	0	0	0
4933432I03Rik	0	0	0	0	0	0	0	0	0	0	0	0.534931	0	0	0	0	0	0	0	0	0	0	0	0
4933432I09Rik	0.459826	0.882896	0.905188	1.72116	0	0	1.23873	0	0.326925	0.226366	0.791398	0.598209	0.275389	0	0	0	1.21135	0	0.243227	1.19991	0	0	0	0
4933432K03Rik	0	0	0	0	0	0	0	0	0	0	0	0	0	0	0	0	0	0	0	0	0	0	0	0
4933433C11Rik	0	0	0	0	0	0	0	0	0	0	0	0	0	0	0	0	0	0	0	0	0	0	0	0
4933433F19Rik	0	0	0	0	0	0	0	0	0	0	0	0	0	0	0	0	0	0	0	0	0	0	0	0
4933433G08Rik	0	0	0	0	0	0	0	0	0	0	0	0	0	0	0	0	0	0	0	0	0	0	0	0
4933433G15Rik	0	0.26879	0.831117	1.30904	0.248381	0	0	0	0	0	0.322617	0	0.33979	0	0.287617	0	0.246138	0.317672	0.297677	2.18755	0.342154	0	0	0
4933433G19Rik	0	0	0	0	0	0	0	0	0	0	0.355443	0	0	0	0	0	0	0	0.328095	0	0	0	0	0
4933433H22Rik	0	0	0	0.789111	0.147217	0	0	0	0	0	0	0.146691	0	0	0	0	0	0	0	0	0	0	0.146797	0
4933434E20Rik	33.6583	31.4161	33.0454	26.6811	32.3097	25.1774	31.4563	26.3633	35.2432	34.4231	36.5758	29.1007	34.9454	25.5797	32.8916	15.0546	37.4055	31.711	35.4521	19.567	35.131	35.2813	34.0891	35.8987
4933434I20Rik	0	0	0	0	0	0	0	0	0	0	0	0	0	0	0	0	0	0	0	0	0	0	0	0
4933436E23Rik	0	0	0	0	0	0	0	0	0	0	0	0	0	0	0	0	0	0	0	0	0	0	0	0
4933436H12Rik	0	0	0	0	0	0	0	0	0	0	0	0	0	0	0	0	0	0	0	0	0	0	0	0
4933436I01Rik	0	0	0	0	0	0	0	0	0	0	0	0	0	0	0	0	0	0	0	0	0	0	0	0
4933438B17Rik	0	0	0	0	0	0	0	0	0	0	0	0	0	0	0	0	0	0	0	0	0	0	0	0
4933438K21Rik	0	0	0	0	0	0	0	0	0	0	0	0	0	0	0	0	0	0	0	0	0	0	0	0
4933439C10Rik	7.4838	8.36202	6.9235	23.7742	7.50053	34.2949	6.66439	2.68977	8.48182	8.08761	6.20571	14.9542	7.41847	21.1525	5.59226	15.1451	10.0055	6.61423	7.1437	16.3018	8.04621	13.4965	7.34541	9.7132
4933439K11Rik	0	0	0	0	0	0	1.44222	0	0	0.355377	0	0	1.7815	0	1.11311	0	0	0	0	1.555	0	0	1.2615	6.16516
4933440J02Rik	0	0	0	0	0	0	0	0	0	0	0	0	0	0	0	0	0	0	0	0	0	0	0	0
4933440M02Rik	0	0	0	0	0	0	0	0	0	0	0	0	0	0	0	0	0	0	0	0	0	0	0	0
5031410I06Rik	0	0	0	0	0	0	0	0	0	0	0	0	0	0	0	0	0	0	0	0	0	0	0	0
5031414D18Rik	0.432411	1.67763	0.424585	1.63799	0.283948	0	0.296095	1.01363	0	0.856845	0.620223	0.286242	0.253724	0	0.110973	5.13772	0.191278	0.746728	0.228367	3.53148	0.128139	3.4731	0.0949243	16.7274
5031425E22Rik	6.58724	9.68942	11.2645	17.092	5.57013	6.38251	7.7711	3.42854	7.48297	6.86214	12.3805	14.8241	10.1387	20.7947	7.694	4.40378	8.3369	7.44841	12.117	16.434	7.67979	7.29951	10.4688	1.41412
5031425F14Rik	0	0.179224	0	0	0	0	0	0	0	0	0	0	0	0	0	7.55489	0	0	0	0	0	0	0	0
5031426D15Rik	0	0	0	0	0	0	0	0	0	0	0	0	0	0	0	0	0	0.0528707	0	0	0	0	0	0
5031434C07Rik	0	0	0	0	0	0	0	0	0	0	0	0	0	0	0	0	0	0	0	0	0	0	0	0
5031434O11Rik	1.56457	3.90949	0.516237	0.948928	0.932794	0	1.35148	0	1.45685	0.505992	1.79468	2.60548	0.657271	0	0	0	1.79954	1.72277	1.10762	3.50428	1.97644	0	1.79758	0
5031439G07Rik	5.81586	18.9243	4.5207	6.11147	5.74909	2.50674	5.82854	9.4525	6.38895	7.46776	5.85533	9.0775	5.29721	8.2509	5.75144	24.5743	9.00969	8.45062	6.2546	15.7508	5.80706	17.7025	5.07112	48.2706
5033403H07Rik	0	0	0	0	0	0	0	0	0	0	0	0	0	0	0	0	0	0	0	0	0	0	0	0
5033404E19Rik	0	0	0	0	0	0	0	0	0	0	0	0	0	0	0	0	0	0	0	0	0	0	0	0
5033406O09Rik	0	0	0	0	0	0	0.236942	0	0	0.1724	0.400669	0	0	0	0.715937	0	0	0	0	0	0	0.750173	0	0
5133400J02Rik	0	0	0	0	0	0	0	0	0	0	0	0	0	0	0	0	0	0	0	0	0	0	0	0
5330411J11Rik	0	0	0	0	0	0	0	0	0	0	0	0	0	0	0	0	0.162863	0	0	0	0	0	0	0
5330413P13Rik	0	0.0753296	0	0	0	0	0	0	0	0	0	0	0	0	0	0	0	0	0	0	0	0	0	0
5330417C22Rik	0.0845616	0	0.0829931	0	0.369748	0	0	0	0	0	0	0	0.197696	1.99229	0	0	0	0	0	0	0.29965	0	0	0
5330426P16Rik	0.991996	2.55337	0.487564	2.02397	1.59696	0	1.79722	9.56137	1.65232	1.95994	1.13823	1.59197	2.1548	0	0	0	2.04056	1.89149	1.22333	5.36305	0.988323	2.84027	1.44796	0
5330434G04Rik	0	0	0	0	0	0	0	0	0	0	0	0	0	0	0	0	0	0	0	0	0	0	0	0
5330439B14Rik	0	0	0	0	0	0	0	0	0	0	0	0	0	0	0	0	0	0	0	0	0	0	0	0
5430401F13Rik	0	0	0	0	0	0	0	0	0	0	0	0	0	0	0	0	0	0	0	0	0	0	0	0
5430402E10Rik	0	0	0	0	0	0	0	0	0	0	0	0	0	0	0	0	0	0	0	0	0	0	0	0
5430402O13Rik	1.09158	0.345376	0	0	0.645499	0	0.48131	0	0.513108	1.06757	0.41739	0.619277	0	0	0	0	0.95067	0.407379	0	0	0.448387	0	0	15.9775
5430403N17Rik	0	0	0	0	0	0	0	0	0	0	0	0	0	0	0	0	0	0	0	0	0	0	0	0
5430405H02Rik	4.84523	5.54103	4.40787	7.5595	3.455	0	4.02355	1.76246	3.52544	6.51186	5.74102	2.33716	3.02999	2.51468	0.441056	6.70359	3.72029	3.88195	3.46566	4.39866	3.9593	4.85865	3.54001	11.1577
5430416N02Rik	18.4702	18.9189	16.4285	12.6093	11.4591	0	8.13022	3.68024	15.0175	10.4446	8.03536	10.9636	26.2179	8.11926	8.4064	22.5627	13.095	28.4086	11.5143	5.2778	15.5646	18.1659	9.82767	0
5430416O09Rik	0	0.0665504	0	0	0	0	0	0	0	0	0	0	0	0	0	0	0	0	0	0	0	0	0	0
5430417L22Rik	15.1502	15.8028	12.5768	10.5544	18.0006	41.7988	13.9884	13.3785	14.4848	12.5181	17.2773	14.0621	16.313	27.1205	13.4446	10.6954	21.2827	10.7839	17.6784	17.2057	15.8176	16.6145	16.7636	12.655
5430419D17Rik	0	0	0	0	0	0	0	0	0	0	0	0	0	0	0	0	0	0	0	0	0	0	0	0
5430421F17Rik	0	0	0	0	0	0	0	0	0	0	0	0	0	0	0	0	0	0	0	0	0	0	0	0
5430421N21Rik	0	10.3798	0	0	0	0	0	0	0	0.168653	0	0	0	0	0	0	0.150497	0	0	0.74807	0	0	0	0
5430425K12Rik	0	0	0	0	0	0	0	0	0	0	0	0	0	0	0	0	0	0	0	0	0	0	0	0
5430427M07Rik	0	0	0	0	0	0	0	0	0	0	0	0	0	0	0	0	0	0	0	0	0	0	0	0
5430427O19Rik	0	0.284535	0	0	0	0	0.402499	0	0.104998	0.290307	0	0	0	0	0.225354	0	0.129662	0	0	0	0.0862233	0	0.128621	0
5430428K19Rik	0	0	0	0	0	0	0	0	0	0	0	0	0	0	0	0	0	0	0	0	0	0	0	0
5430434I15Rik	0	0	0	0	0	0	0	0	0	0	0	0	0	0	0	0	0	0	0	0	0	0	0	0
5430435G22Rik	0.457827	3.32866	1.23639	1.73318	0.400979	3.30287	0.313224	0.953031	0.655719	1.13364	0.26267	1.21115	0	11.2045	0.234961	20.3755	0.202441	1.31678	0.483619	17.0649	0.135799	23.5411	0.301423	88.4638
5430437J10Rik	0	0.264944	0.272959	0	0	0	0	0	0	0	0	0	0	0	0	0	0	0	0	0	0	0	0.482843	0
5430440P10Rik	0	0	0	0	0	0	0	0	0	0	0	0	0	0	0	0	0	0	0	0	0	0	0	0
5530400C23Rik	0	0	0	0	0	0	0	0	0	0	0	0	0	0	0	0	0	0	0	0	0	0	0	0
5530401A14Rik	0	0	0	0	0	0	0	0	0	0	0	0	0	0	0	0	0	0	0	0	0	0	0	0
5530601H04Rik	1.35355	2.63306	1.99231	0.857348	2.2348	0.686482	1.55178	0.0787448	2.05135	1.04481	1.29434	0.600206	2.98403	11.3104	2.54917	2.45675	1.99989	0.868869	1.42908	3.39989	4.25755	5.14635	3.042	0.157006
5730403I07Rik	0	0	0	0	0	0	0	0	0	0	0	0	0	0	0	0	0	0	0	0	0	0	0	0
5730405O15Rik	0.784913	0	3.87497	1.44593	0.697287	0	0	0	1.105	1.14975	0.90045	0.665318	0	0	0.800973	0	0	0	2.49634	0	0.485818	0	1.02048	0
5730408K05Rik	89.7058	88.6516	95.0904	114.625	171.541	105.734	74.7372	62.3435	83.6519	81.5946	91.9378	107.921	130.252	78.9634	47.9322	15.6503	140.078	75.7191	135.861	109.469	166.307	81.1413	87.0703	0
5730409E04Rik	0.200683	2.53351	0.394041	1.14117	0.526915	0	1.92662	0	1.00688	0.298366	1.61195	0.443318	0.235204	0	1.03023	0	0.35526	0.115618	0.423899	2.83938	0.831608	0	1.76325	10.9643
5730412P04Rik	0	0	0	0	0	0	0	0	0	0	0	0	0	0	0	0	0	0	0	0	0	0	0	0
5730416F02Rik	0	0	0	0	0	0	0	0	0	0	0	0	0	0	0	0	0	0	0	0	0	0	0	0
5730420D15Rik	0	0	0	0	0	0	0	0	0	0	0	0	0	0	0	0	0	0	0	0	0	0	0	0
5730422E09Rik	0.176224	0.509827	0.173265	0.331537	0.309656	0	0.717288	0	0	0.521974	0.202201	0.154017	0.627537	0	0.180646	0	0.931511	0	0.1863	0	0	0	0.154258	0
5730435O14Rik	0	0	0	0	0.587535	0	0	0	0	0	0	0	0	0	0	0	0	0	0	0	0	0	0	0
5730455P16Rik	10.4567	5.59761	14.9972	16.1161	9.13362	17.503	9.01915	2.69537	10.3692	6.37691	12.7009	13.4771	10.752	1.4404	10.368	4.78754	6.40239	6.43972	14.1366	15.0971	11.0129	18.1671	10.9238	11.3248
5730457N03Rik	0	0	0	0	0	0	0	0	0	0	0	0	0	0	0	0	0	0	0	0	0	0	0	0
5730460C07Rik	0	0	0	0	0	0	0	0	0	0	0	0	0	0	0	0	0	0	0	0	0	0	0	0
5730480H06Rik	0.173796	0.838174	3.92998	3.27046	1.22141	0	1.1794	0	0.248	0.68646	2.59239	2.27921	0.618637	0	1.78165	0	0.612542	1.58918	2.021	4.71846	1.45633	2.2401	1.52149	0
5730488B01Rik	0	0	0	0	0	0	0	0	0	0	0	0	0	0	0	0	0	0	0	0	0	0	0	0
5730507C01Rik	0	0	0	0	0	0	0	0	0	0	0	0	0	0	0	0	0	0	0	0	0	0	0	0
5730508B09Rik	6.85989	3.67076	4.87251	9.84468	5.36124	0	10.8373	2.94037	3.80277	6.76802	6.99642	8.14365	4.08121	9.67928	12.4976	26.026	6.37361	5.86984	4.43267	5.16277	6.86054	9.01246	12.0017	3.12527
5730522E02Rik	0	0	0	0	0	0	0	0	0	0	0	0	0	0	0	0	0	0	0	0	0	0	0	0
5730559C18Rik	0	2.19817	0	0.0894438	0.412618	0	0.129417	0	0.135258	0.187031	0.10823	0.0834155	0	0	0	0	1.67032	0	0	0	0	0	0	0
5830403L16Rik	0	0.177263	0	0	0	0	0	0	0	0	0	0	0	0	0	0	0	0.210003	0	0	0	0	0	0
5830411N06Rik	4.16605	13.5893	23.1764	36.0231	15.7053	40.1047	81.568	64.1195	1.68389	0.282438	13.945	18.3587	0.802471	4.8238	22.7164	26.5405	2.90544	2.53798	9.59246	19.8344	5.29304	16.4188	16.7036	20.1512
5830415F09Rik	10.799	9.64026	4.44182	8.29486	9.67022	0.891284	11.9549	3.22888	10.9115	9.48924	8.33548	5.64652	10.7573	16.3859	8.44981	15.3083	8.9837	10.2979	7.47451	1.54334	11.0846	14.7777	6.35333	10.0542
5830416I19Rik	0.109533	0.212454	0	0	0.191818	0	0	6.16094	0	0	0	0	0	0	0.112439	0	0.48448	0.252164	0.231393	0	0	0	0.192349	0
5830416P10Rik	1.5098	0.964026	0.612771	0.247894	1.63634	2.53751	1.79636	0.492436	1.27258	0.93115	0.836397	0.370626	2.4818	0	2.35434	0.708238	0.878177	0.422167	0.659411	1.48121	2.75398	1.11229	4.90421	0.92739
5830417I10Rik	10.7187	11.1928	9.72688	10.9409	9.39451	10.8124	11.8754	12.4392	10.805	10.746	10.0295	11.389	8.72031	11.3506	12.4351	24.9864	10.5079	9.19435	9.07692	13.8485	8.78801	9.44323	13.5409	14.7454
5830418K08Rik	17.9188	10.5059	22.4146	23.4195	17.5944	12.3633	14.8904	20.1196	17.9356	14.3355	20.0125	19.2691	22.5777	14.2264	19.332	7.63322	16.1196	12.2359	20.5046	20.3954	19.2435	18.1051	17.6376	2.90459
5830418P13Rik	1.61416	3.60713	6.06237	2.28697	3.99209	11.6343	3.85453	0	3.27105	2.10281	4.31381	2.95678	5.23227	0	3.1401	5.09003	5.81574	1.69852	3.19034	1.42052	4.47385	4.61522	1.04309	1.15837e-05
5830428M24Rik	0.321489	2.45812	0.953734	0.298154	2.28411	0	2.57443	5.53017	0	0.631562	0.739611	1.10395	1.96267	9.37628	1.64793	12.7927	1.40782	0.724941	2.39154	5.54924	3.16023	2.0927	2.80481	0
5830432E09Rik	5.78502	3.5772	4.26842	6.58818	5.45411	9.06186	5.30407	4.66446	4.41328	4.6845	6.40053	5.39358	5.42314	0	4.02147	3.69818	4.90534	4.94143	5.89968	3.42415	4.97112	2.22248	6.14047	0
5830444B04Rik	0	1.61753	0	0	0	0	0	0	0	0	0	0	0	0	0	0	0.000126444	0	0	0	0	0	0	0
5830454E08Rik	6.00974	7.05117	4.95535	4.10869	3.57918	0	1.95198	4.91877	4.20228	3.89123	3.44687	6.691	6.91737	0	2.54953	10.3709	6.48839	4.42126	3.72173	1.68667	3.15296	1.09199	2.15976	0
5830473C10Rik	0	0.125696	0	0	0.113799	0	0	0	0	0	0	0	0	0	0	0	0	0	0	0	0	0	0	0
5930403L14Rik	0	0	0.0475462	0	0	0	0	0	0	0	0	0	0	0	0.0996572	0	0	0	0	0	0	0	0.341489	1.88059
5930412G12Rik	0.48243	1.16857	0	0	0	0	0	0	0.172673	0.597093	0	0	0	0	0	0	1.27943	0.97062	0	0	0	0	0	0
5930430L01Rik	1.73603	1.15169	0	0	0.830257	0	0.979729	0	0.807181	0.697019	0.0906019	0.0699825	0.655507	0	1.15416	1.06894	0.839824	0.729601	0.148253	0	0.933063	0	1.39073	0
5930438M14Rik	0	0	0	0	0	0	0	0	0	0	0	0	0	0	0	0	0	0	0	0	0	0	0	0
6030407O03Rik	0	0	0	0	0	0	0	0	0	0	0	0	0	0	0	0	0	0	0	0	0	0	0	0
6030408B16Rik	0.151003	0.437794	0.296789	0	0.264999	0	0	0	0.215781	0.149282	0.866329	0.264909	0.178483	0	0	0	1.06592	0.173027	0.319171	0.663093	0	0	0	0
6030419C18Rik	0	0	0	0	0	0	0	0	0	0	0	0	0	0	0	0	0	0	0	0	0	0	0	0
6030440G07Rik	0	0	0	0	0	0	0	0	0	0	0	0	0	0	0	0	0	0	0	0	0	0	0	0
6030443J06Rik	1.739	1.00325	1.51651	0.428818	1.46294	0	0.887405	1.35118	1.29551	1.15122	0.517357	1.48747	2.70137	3.73456	1.853	0	1.31412	0.596068	0.815902	2.45855	2.65475	1.51448	2.21012	0
6030458C11Rik	38.8689	45.7008	49.5921	51.9545	35.6647	87.8276	49.0945	52.8718	38.3154	38.4609	38.7529	43.1328	40.2436	42.8863	59.3712	35.2333	54.6423	40.2516	46.0518	60.9807	48.8804	61.0372	63.8499	31.9734
6030466F02Rik	0	0	0	0	0	0	0	0	0	0	0	0	0	0	0	0	0	0	0	0	0	0	0	0
6030468B19Rik	0	0.872398	0	0	0	0	0	0	0	0	0	0.261573	0	0	0	0	0	0	0	1.83912	0	0	0	0
6030469F06Rik	0	0	0	0	0	0	0	0	0	0	0	0	0	0	0	0	0	0	0	0	0	0	0	0
6030498E09Rik	0	0	0	0	0	0	0	0	0	0	0	0	0	0	0	0	0	0	0	0	0	0	0	0
6230400D17Rik	0.606156	0.867532	2.98726	1.97107	0.804032	0	2.42525	0	1.28708	1.18925	1.39087	3.12169	1.10284	7.15532	1.54929	7.88434	1.05975	0.683171	0.320933	1.30642	1.48009	1.96471	2.37388	2.13702
6330403A02Rik	17.4444	18.522	13.4234	24.5065	8.15737	12.5918	1.61508	0	11.8288	25.4329	15.2291	11.0091	12.9334	4.83863	4.97653	4.48346	16.7202	40.1717	36.0271	22.0312	11.6089	2.58447	6.24884	2.32149
6330403K07Rik	10.9007	6.99922	3.19742	2.69443	3.69929	0	6.47347	9.04875	5.45191	4.1508	6.80225	3.50239	3.18611	4.16327	5.8793	0	5.89138	5.67242	5.05536	3.17544	4.59069	4.93379	6.69148	1.17608
6330407A03Rik	0	0	0	0	0	0	0	0	0	0	0	0	0	0	0	0	0	0	0	0	0	0	0	0
6330408A02Rik	3.46155	4.67703	2.65154	4.00706	3.61773	8.60295	3.5961	5.38528	3.14992	2.67999	2.51886	2.39275	3.94754	3.36619	4.59577	4.56705	3.21655	3.89812	2.40701	3.43908	3.19111	0.180637	3.04284	2.55224
6330409D20Rik	0	0.279211	0	0	0	0	0	0	0	0.287017	0	0	0	0	0	0	0	0.329899	0	0	0	0	0.25457	3.83496
6330410L21Rik	0	0	0	0	0	0	0	0	0	0	0	0	0	0	0	0	0	0	0	0	0	0	0	0
6330415B21Rik	0	0	0	0	0	0	0	0	0	0	0	0	0	0	0	0	0	0	0	0	0	0	0	0
6330416G13Rik	13.9962	14.2877	10.927	10.4304	14.3308	14.7053	13.7193	24.9321	12.766	11.5102	11.624	9.80367	14.4453	7.28689	12.6297	13.2427	16.2445	12.3271	10.2872	19.7379	12.7736	19.1857	14.3473	26.9534
6330418K02Rik	2.2902	2.72717	0.495535	3.34171	1.62178	0	5.01143	0	0	0.972807	0.99678	0.836375	2.45328	0	1.52972	6.66699	5.43949	2.02433	1.06335	5.82509	3.78355	0	1.37949	0
6330419J24Rik	3.71587	1.3533	1.64139	1.93836	2.35692	0.141229	1.65737	0	4.52982	1.84223	1.38577	1.06827	2.60981	1.17861	0.858547	0	2.05658	1.07128	1.96206	0.657396	1.97757	5.16971	0.653033	2.99791
6330549D23Rik	21.978	16.9063	20.1853	16.7004	22.6934	24.4728	20.5477	24.0838	21.3413	20.8795	19.757	20.3124	20.4202	15.421	24.7486	19.1975	18.018	21.4708	20.431	20.7636	17.39	14.5298	20.7282	19.1636
6430411K18Rik	0	0	0	0	0	0	0	0	0	0	0	0	0	0	0	0	0	0	0	0	0	0	0	0
6430503K07Rik	0	0	0	0	0	0	0	0	0	0	0	0	0	0	0	0	0	0	0	0	0	0	0	0
6430531B16Rik	0	0.265759	0	0	0	0	0	0	0	0.273009	0	0	0	0	0	0	0	0	0	0	0	1.19983	0	5.90235
6430548M08Rik	2.58243	3.29193	0.38942	1.75014	3.3016	0	0.342584	15.0391	4.01177	6.66315	0.854601	0.884102	3.92506	0	0.152871	0.556368	3.17498	3.85569	0.995691	0.735515	2.74283	2.65226	1.19147	7.39862
6430550D23Rik	0.318345	0.372604	0.312894	0.545053	0.279449	0	0	0	0	0	0.221978	0.506015	0.46064	0	0.198246	0	0	0.220655	0.504717	1.69034	0	0	0	0
6430562O15Rik	0.997872	0.196639	0	0.199443	0	1.60088	0	0	0.557892	0	1.11954	1.00574	0	0	0	0	0.170391	0.424707	0	0	0.672779	0	0.326612	0
6430571L13Rik	0.11304	1.64393	0	0	0.0989969	0	0	0	0	0	0.259419	0	0.132765	0	0	1.43135	0	0.130068	0	0.398974	0	0	0	0
6430573F11Rik	0	0	0	0	0	0	0	0	0	0	0	0	0	0	0	0	0	0	0	0	0	0	0	0
6430584L05Rik	0	0	0	0	0	0	0	0	0	0	0	0	0	0	0	0	0	0	0	0	0	0	0	0
6430706D22Rik	78.8965	57.7367	91.0498	99.3907	78.0159	77.9626	64.125	80.8747	94.8097	74.2822	97.5106	93.1986	75.6509	93.4578	66.3629	36.3071	76.3712	74.4074	78.3884	83.4297	72.6365	74.1064	66.5871	55.2939
6430710C18Rik	0	0	0	0	0	0	0	0	0	0	0	0	0	0	0	0	0	0	0	0	0	0	0	0
6530402F18Rik	0.973926	4.23492	0.828097	1.97607	0.453791	0	1.78904	5.37992	0.839537	1.80522	0.968579	0.865033	0.501052	2.58829	2.25791	5.02799	3.67349	0.600855	0.548339	3.74623	1.05672	3.60873	3.31335	6.51785
6530411M01Rik	0	0	0	0	0	0	0	0	0	0	0	0	0	0	0	0	0	0	0	0	0	0	0	0
6720416L17Rik	0	0.114483	0	0	0	0	0	0	0	0	0	0	0	0	0	0	0	0	0	0	0	0	0	0
6720468P15Rik	0	0	0	0	0	0	0.315789	0	0	0	0	0	0	0	0	0	0	0	0	0	0	0	0	0
6720483E21Rik	0	0	0	0	0	0	0	0	0	0	0	0	0	0	0	0	0	0	0	0	0	0	0	0
6720489N17Rik	0	0.952919	0.321596	0	0.382363	0	0.74745	2.38815	0	0.216319	0.250543	0.385372	0.51256	0	0.672413	0	0.289736	0.125671	0.230629	0	0.517708	0	1.24616	0
6820408C15Rik	0	0	0	0	0	0	0	0	0	0	0	0	0	0	0	0	0	0	0	0	0	0	0	0
6820431F20Rik	23.1536	15.6441	41.592	38.2151	23.4574	20.774	22.7887	21.8937	24.2245	16.7625	34.6717	29.5272	28.4229	33.4154	34.4823	11.7242	20.724	14.0165	41.2712	41.7443	30.3832	31.4128	36.5349	14.7875
7420426K07Rik	0	0	0	0	0	0	0	0	0	0	0	0	0	0	0	0	0	0.23388	0	0	0	0	0	0
7420461P10Rik	0	0	0	0	0	0	0	0	0	0	0	0	0	0	0	0	0	0	0	0	0	0	0	0
7420700N18Rik	0	0	0	0	0	0	0	0	0	0.169194	0	0	0	0	0	0	0	0	0	0	0	0	0	0
7420701I03Rik	0	0	0	0	0	0	0	0	0	0	0	0	0	0	0	0	0	0	0	0	0	0	0	0
7530416G11Rik	0	0	0	0	0	0	0	0	0	0	0	0	0	0	0	0	0	0	0	0	0	0	0	0
7630403G23Rik	0	0	0	0	0	0	0	0	0	0	0	0	0	0	0	0	0	0	0	0	0	0	0	0
8030411F24Rik	0	0	0	0	0	0	0	0	0	0	0	0	0	0	0	0	0	0	0	0	0	0	0	0
8030423F21Rik	0	0.097443	0	0	0	0	0	0	0	0.0995113	0	0	0	0	0	0	0.0888648	0	0	0	0.118869	0	0.0881902	0
8030423J24Rik	0	0	0	0	0	0	0	0	0	0	0	0	0	0	0	0	0	0	0	0	0	0	0	0
8030442B05Rik	0	0	0	0	0	0	0	0	0	0	0	0	0	0	0	0	0	0	0	0	0	0	0	0
8030443G20Rik	0	0	0	0	0	0	0	0	0	0	0	0	0	0	0	0	0	0	0	0	0	0	0	0
8030462N17Rik	17.007	11.7967	15.3945	15.5196	13.4996	5.27398	15.9983	14.5938	14.8099	15.2341	15.6313	14.1158	15.2429	13.0169	17.1288	9.26346	13.0216	14.5831	16.2142	19.1582	13.7458	17.3092	14.5884	11.1912
8430408G22Rik	0	0	0	0	0	0	0	0	0	0.236436	0	0	0	0	0	0	0	0	0	0	0	0	0	0.244372
8430419L09Rik	14.0783	11.259	11.1535	11.1252	11.838	8.35034	12.2	16.704	15.3821	13.2566	12.1352	11.0934	14.1728	24.5519	14.1932	11.6589	8.20777	11.1612	10.0476	15.3693	12.8464	6.78234	19.364	17.6899
8430422H06Rik	0	0	0	0	0	0	0	0	0	0	0	0	0	0	0	0	0	0	0	0	0	0	0	0
8430423G03Rik	0	0	0	0	0	0	0	0	0	0	0	0	0	0	0	0	0	0	0	0	0	0	0	0
8430426J06Rik	0	0	0	0	0	0	0	0	0	0	0	0	0	0	0	0	0	0	0	0	0	0	0	19.2953
8430427H17Rik	6.12008	6.34748	14.5997	17.958	3.93255	3.35703	6.15239	8.39322	5.8443	8.71004	11.1862	14.734	3.52839	1.50829	4.6308	5.72469	6.39175	8.63009	10.1292	12.1103	3.9695	5.75365	5.30266	3.79913
8430429K09Rik	7.04623	6.09584	4.08603	9.85295	5.55693	0	7.56962	6.51498	4.89632	5.88531	6.21911	5.99653	5.58282	0	5.18527	3.81401	7.95635	8.04773	4.77535	3.162	6.92814	6.60014	14.0726	0
8430431K14Rik	0	0	0	0	0	0	0	0	0	0	0	0	0	0	0	0	0	0	0	0	0	0	0	0
8430436N08Rik	0	0	0	0	0	0	0	0	0	0	0	0	0	0	0	0	0	0	0	0	0	0	0	0
8430437L04Rik	0	0	0	0	0	0	0	0	0	0	0	0	0	0	0	0	0	0	0	0	0	0	0	0
9030025P20Rik	0.967138	0.668335	1.08593	1.43499	0.84807	0	1.1306	3.1521	0.592769	0.54671	0.792667	1.21416	1.14068	3.75783	0	0	0.854041	0.475609	1.45991	5.34746	0.822541	0.592651	0.242304	0
9030204H09Rik	0	0	0	0	0	0	0	0	0	0	0	0	0	0	0	0	0	0	0	0	0	0	0	0
9030404E10Rik	0	0	0	0	0	0	0	0	0	0	0	0	0	0	0	0	0	0	0	0	0	0	0	0
9030612E09Rik	0	0	0	0	0	0	0	0	0	0	0	0	0	0	0	0	0	0	0	0	0	0	0	0
9030617O03Rik	3.5873	5.44083	2.57631	4.15142	2.98452	0	8.8923	11.3395	4.14234	3.99186	5.82318	6.50638	3.68377	7.9287	12.8496	14.2607	6.20048	3.33165	2.95654	5.26648	4.03235	2.43396	11.9967	15.0417
9030619P08Rik	0	0	0	0	0	0	0	0	0	0	0	0	0	0	0	0	0	0	0	0	0	0	0	0
9030624G23Rik	0	0	0	0.121687	0.225705	0	0	0	0	0	0	0.226611	0	0	0	0	0.113767	0	0.136037	0	0.153095	0	0.112954	0
9030624J02Rik	3.66865	3.71925	3.44695	3.18807	5.25435	0	3.54233	1.14383	3.92177	4.18261	4.29935	2.83705	4.37499	1.55601	4.00899	3.91651	2.76742	3.06551	3.37902	3.5279	3.68442	0.667838	2.95134	7.49344
9030625G05Rik	0	0	0	0	0	0	0	0	0	0	0	0	0	0	0	0	0	0	0	0	0	0	0	0
9130008F23Rik	0	0.131698	0	0	0	0	0	0	0	0	0	0	0	0	0	0	0	0	0	0	0	0	0	0
9130011E15Rik	3.81571	3.03935	3.64985	3.8027	4.88023	8.03028	2.81779	3.36913	4.34851	2.71565	4.49072	3.45935	5.73105	4.61079	2.81284	2.48457	3.55114	4.2851	4.54645	4.58414	2.89488	1.0473	3.09428	5.49566
9130015A21Rik	0	0	0	0	0	0	0	0	0	0	0	0	0	0	0	0	0	0	0	0	0	0	0	0
9130015L21Rik	0	0	0	0	0	0	0	0	0	0	0	0	0	0	0	0	0	0	0	0	0	0	0	0
9130019O22Rik	4.84031	4.21711	2.48103	1.23587	2.65179	0	3.38059	4.46549	3.94226	3.65715	1.82379	3.01258	2.5283	0.785481	3.19136	6.16299	3.20281	4.17505	2.82206	3.01125	2.47014	1.23588	3.93957	1.66
9130019P16Rik	0.13167	0.0647475	0	0.235206	0.0580829	0	0	0	0.0888165	0.139472	0.0709242	0.0549213	0.0845116	0	0	0	0	0.080469	0	0	0.0727604	0	0	0
9130023H24Rik	3.13763	2.50768	2.94467	1.26006	1.84812	0	4.22398	0.686529	3.78206	2.42301	1.9897	2.2392	2.24802	5.70194	2.63392	4.67887	2.99392	2.0709	3.15158	4.50786	3.86677	2.30854	3.22043	0.410358
9130024F11Rik	0	0	0.147915	0.143214	0	7.22442	0	0	0	0.0747989	0	0.0668397	0	0	0	0	0	0	0.0795743	0.13363	0	0	0	0
9130204L05Rik	0	0	0	0	0	0	0	0	0	0	0	0	0	0	0	0	0	0	0	0	0	0	0	0
9130209A04Rik	0	0	0	0	0	0	0	0	0	0	0	0	0	0	0	0	0	0	0	0	0	0	0	0
9130221F21Rik	0	0	0	0	0	0	0.149916	0	0.156862	0	0	0	0	0	0	0	0	0	0	0	0	0	0	0
9130221H12Rik	14.3507	20.2491	12.1	13.0015	18.5378	15.1205	26.5709	18.0578	20.4878	22.4219	12.1343	17.9903	19.8961	10.8023	21.5695	26.2079	17.6707	14.6068	17.406	16.1502	16.9767	26.5595	17.3139	16.2576
9130227L01Rik	0	0	0	0	0	0	0	0	0	0	0	0	0	0	0	0	0	0	0	0	0	0	0	0
9130230L23Rik	0	0	0	0	0	0	0	0	0	0	0	0	0	0	0	0	0	0	0	0	0	0	0	0
9130401M01Rik	34.2556	61.7752	31.1107	32.9203	28.7079	32.0565	39.9042	42.3563	31.5371	48.9028	35.428	38.0169	28.6625	49.9145	26.6709	65.1206	44.0293	52.2791	27.0559	29.9638	26.8407	9.87643	25.4751	57.8989
9130409I23Rik	0	0	0	0	0	0	0	0	0	0	0	0	0	0	0	0	0	0	0	0	0	0	0	0
9230009I02Rik	0	0	0	0	0	0	0	0	0	0	0	0	0	0	0	0	0	0	0	0	0	0	0	0
9230102K24Rik	0	0	0	0	0	0	0	0	0	0	0	0	0	0	0	0	0	0	0	0	0	0	0	0
9230102O04Rik	0	0	0	0	0	0	0	0	0	0	0	0	0	0	0	0	0	0	0.534728	0	0	0	0	0
9230104L09Rik	0	0	0	0	0	0	0	0	0	0	0	0	0	0	0	0	0	0	0	0	0	0	0	0
9230105E05Rik	0.779752	3.14544	0.510644	1.7193	0	0	0.177445	0	0.371905	0.128616	0.447363	0.228684	0	0	0	0	6.4299	0.447772	0.54923	0	0	0	0.114001	0
9230110C19Rik	3.44482	5.3453	4.32906	4.85341	6.56262	0	3.6277	5.5118	3.54627	5.28662	4.83089	4.33934	4.55498	5.90223	4.51071	0	8.42227	9.16962	7.48735	0.501739	6.66144	6.17173	2.5111	0
9230110F15Rik	0	0	0	0	0	0	0	0	0	0	0	0	0	0	0	0	0	0	0	0	0	0	0	0
9230112D13Rik	0	0	0	0	0	0	0	0	0	0	0	0	0	0	0	0	0	0	0	0	0	0	0	0
9230112J17Rik	0	0	0	0	0	0	0	0	0	0	0	0	0	0	0	0	0	0	0	0	0	0	0	0
9230114K14Rik	2.08331	1.20924	1.77392	0.524513	1.09613	0	2.27284	0.288025	1.98617	2.19823	3.02793	0.610199	2.78509	9.82167	2.42221	3.50093	2.4528	0.478066	3.08191	1.71024	2.31544	1.19156	3.04458	0
9230116L04Rik	0.400999	0.398787	0.592819	1.49872	0.352412	21.1512	0	0	0	0.416155	1.39877	1.32161	0.71264	0	0	0	0.381997	0.469323	1.2428	0	0.4783	0.541836	0.345325	0
9230116N13Rik	0.428467	1.35909	0.852513	2.1222	0.500425	0	1.72414	0	0.83797	0.5838	0.822342	0.740612	0.331572	0	1.46237	7.40002	1.38321	0.654449	0.920056	0	0.50208	0.301388	1.23196	0
9330020H09Rik	1.97708	2.24214	2.34456	1.56425	1.87284	0	1.58507	0	2.24623	1.8797	2.17416	1.6056	1.92523	0	1.77685	0	1.89791	3.2337	1.65268	3.06455	2.14001	3.34853	1.73812	0
9330102E08Rik	0.0728596	0.283524	0.428951	0.138481	0.127357	5.76517	0.100269	0.686921	0.104624	0.144636	0.75246	0.129277	0.595029	0	0.1497	0	0.3876	0.421037	0.0769229	0	0.257735	0	0.128163	0
9330111N05Rik	0	0	0	0	0	0	0	0	0	0	0	0	0	0	0	0	0	0	0	0	0	0	0	0
9330117O12Rik	0	0	0	0	0	0	0	0	0	0	0	0	0	0	0	0	0	0	0	0	0	0	0	0
9330133O14Rik	6.19711	7.29579	8.47795	9.91592	4.80165	2.00703	9.46939	9.67067	5.09675	5.43718	5.59557	6.55192	5.22599	8.65493	7.6142	6.92871	9.89064	5.38398	7.40352	7.76575	7.94009	6.30841	9.75	10.6669
9330151L19Rik	7.0745	5.51677	13.7754	13.138	7.67423	12.932	7.35548	11.4066	4.98652	5.66137	8.1304	7.81644	6.79893	0	8.63467	7.29841	5.89418	1.37592	12.1123	16.2533	8.02612	6.43787	10.5655	7.2035
9330158H04Rik	0	0	0	0	0	0	0	0	0	0	0	0	0	0	0	0	0	0	0	0	0	0	0	0
9330159F19Rik	0	0	0	0	0	0	0	0	0	0	0	0	0	0	0	0	0	0	0	0	0	0	0	0
9330159M07Rik	0.527699	0.511938	4.24933	5.69946	1.38607	0	0	0	0.756255	0.313693	3.07293	3.13234	1.73346	0	0.21663	0	0.186704	0.121449	2.89875	4.10202	3.09833	2.03452	0.556112	0
9330162012Rik	0	0.221117	0	0.395706	0	0	0	0	0	0.20801	0.242167	0.183539	0	0	0.216191	0	0	0.480506	0	0	0	0	0.960964	0
9330162B11Rik	0	0	0	0	0	0	0	0	0	0	0	0	0	0	0	0	0	0	0	0	0	0	0	0
9330175E14Rik	0.399502	1.15349	0.589458	0	0	0	0.810447	0	0	0.196983	0.916763	0.34798	0	0	0.613985	0	0.175724	0	0.422473	2.26699	0.240058	0	1.9213	3.27142
9330175M20Rik	0	0	0	0	0	0	0	0	0	0	0	0	0	0	0	0	0	0	0	0	0	0	0	0
9330178D15Rik	0	0	0	0	0	0	0	0	0	0	0	0	0	0	0	0	0	0	0	0	0	0	0	0
9330179D12Rik	0	0.466285	0.289987	0.273626	0.520236	0	0	0	1.66736	0.288798	0.557898	0.252889	0.712851	0	0	0	0	0	0.623193	2.03197	0.717639	0	0.424289	0
9330182L06Rik	0	0	0.0585936	0.170512	0	0	0	0	0	0	0.0685409	0.265459	0	0	0.122757	0	0.159005	0.0691331	0	0	0	0	0	0
9330182O14Rik	0	0	0	0	0	0	0	0	0	0	0	0	0	0	0	0	0	0	0	0	0	0	0	0
9330188P03Rik	0	0	0	0	0	0	0	0	0	0	0	0	0	0	0	0	0	0	0	0	0	0	0	0
9430007A20Rik	0	0	0	0	0	0	0	0	0	0	0	0	0	0	0	0	0	0	0	0	0	0	0	0
9430008C03Rik	28.9987	29.2171	44.9246	51.111	25.9488	46.686	22.2274	10.9748	33.8807	32.8538	38.8072	54.8223	29.7454	53.2084	24.5049	10.3462	32.5794	39.7233	45.257	53.5926	29.61	31.7208	21.4972	13.4651
9430014N10Rik	0	0	0	0	0	0	0	0	0	0	0	0	0	0	0	0	0	0	0	0	0	0	0	0
9430015G10Rik	44.463	48.5586	36.7812	49.3651	37.9321	93.0229	48.1041	69.1206	46.7296	43.6966	32.8265	41.3327	39.7825	70.9888	43.2833	12.8174	53.6331	48.2441	38.5947	49.4358	43.3504	48.2642	42.8652	36.2299
9430016H08Rik	25.6563	21.6514	20.1109	23.7672	21.3556	24.3972	19.8174	5.58067	24.648	28.2917	20.1695	21.6097	21.3695	7.32962	15.5651	28.867	28.7728	34.5147	23.1233	27.2493	18.6639	35.3003	22.8099	17.4047
9430018G01Rik	0.0682059	0.13276	0	0	0	0	0	0	0	0	0	0	0	0	0	0	0.0604913	0	0	0	0	0	0	0
9430019J16Rik	0	0	0	0	0	0	0	0	0	0	0	0	0	0	0	0	0	0	0	0	0	0	0	0
9430020K01Rik	0.0406193	1.86238	1.03563	2.71081	0.496201	0	0.617656	1.28297	0.0584464	0.323075	1.02547	1.95514	0.329968	1.4717	0.751629	3.32238	1.44347	0.188455	0.428668	0.397822	0.333673	0.433685	0.465123	1.40713
9430021M05Rik	0	0	0	0	0	0	0	0	0	0	0	0	0	0	0	0	0	0	0	0	0	0	0	0
9430037G07Rik	0.178529	0	0.350467	0.677541	0.312324	0	0	0	0	0.177053	0.10243	0.316012	0.104427	0	0	0	0.158129	0	0.471313	0	0	0.573088	0.313803	0
9430038I01Rik	13.0415	17.9937	18.2769	12.1322	10.7564	25.7632	12.3905	21.7324	12.7281	14.5089	17.955	21.9314	12.9766	0	12.7442	9.11253	12.9309	15.0467	17.7963	9.25917	12.0055	10.0137	9.84246	9.36072
9430041J12Rik	0	0	0	0	0	0	0	0	0	0	0	0	0	0	0	0	0	0	0	0	0	0	0	0
9430060I03Rik	0.254978	0.217631	0.445798	0.240011	0.600783	0.549755	0.620052	0	0	0.202767	0.748521	0.401855	0	0	0.876621	1.17939	0.20464	0	0.24402	0	0.595818	0	0.190795	0
9430069I07Rik	0	0	0	0	0	0	0	0	0	0	0	0	0	0	0	0	0	0	0	0	0	0	0	0
9430076C15Rik	0	0	0	0	0	0	0	0	0	0	0	0	0	0	0	0	0	0	0	0	0	0	0	0
9430083A17Rik	0.0954067	0.0926378	0.0936568	0.18093	0	0	0	0	0.273617	0.189177	0.218955	0.253091	0.223453	0	0.0979664	0	0.084473	0.109992	0	0.759317	0.112876	0	0.16765	0
9430091E24Rik	1.18434	1.86862	1.78138	2.03896	1.68799	3.78851	1.55157	0	1.62394	1.123	1.43105	2.29984	2.39703	11.7155	3.60764	0	1.60435	0.652236	2.39525	3.40127	3.08532	1.94316	2.68736	0
9530002B09Rik	0	0	0	0	0	0	0	0	0	0	0	0	0	0	0	0	0	0	0	0	0	0	0	0
9530003J23Rik	0	0	0	0	0	0	0	0	0	0	0	0	0	0	0	0	0	0	0	0	0	0	0	0
9530026F06Rik	0	0	0	0	0	0	0	0	0	0	0	0	0	0	0	0	0	0	0	0	0	0	0	0
9530026P05Rik	0	0	0	0	0	0	0	0	0	0	0	0	0	0	0	0	0	0	0	0	0	0	0	0
9530027J09Rik	3.81851	1.02947	4.46091	4.92039	5.41768	0	3.08285	0	3.25629	4.41508	3.01548	4.70595	4.07161	0	1.95851	0	3.75949	1.75711	3.25773	0	6.61567	3.94117	3.25809	0
9530036O11Rik	0	0.0945984	0	0	0	0	0	0	0	0	0	0	0	0	0	0	0	0	0	0	0	0	0	0
9530051G07Rik	0	0	0	0	0	0	0	0	0	0	0	0	0	0	0	0	0	0	0	0	0	0	0	0
9530052E02Rik	0	0	0	0	0	0	0	0	0	0	0	0	0	0	0	0	0	0	0	0	0	0	0	0
9530053A07Rik	0.0342742	0	0	0.0326972	0.0298968	0	0.0474211	0	0.0986723	0	0.0393311	0.061158	0.0397333	0	0.035239	0.632873	0	0	0	0	0	0	0	0
9530059O14Rik	0	0	0	0	0	0	0	0	0	0	0	0	0	0	0	0	0	0	0	0	0	0	0	0
9530068E07Rik	91.6123	79.4531	95.8533	73.6761	100.209	62.6041	94.6192	84.4329	95.3625	80.2557	94.8789	70.2936	104.365	78.9958	96.7992	48.4818	89.1031	79.6964	90.2011	61.0085	105.816	69.2093	94.3266	55.6592
9530077C05Rik	10.3279	8.81033	8.67792	11.9356	9.05538	8.24767	6.11812	11.4189	12.8286	10.2181	10.9151	9.43744	5.92806	0	5.298	6.96175	12.602	9.35832	11.4871	8.2504	6.14657	9.90861	5.7204	1.82657
9530080O11Rik	0	0	0	0	0	0	0	0	0	0	0	0	0	0	0	0	0	0	0	0	0	0	0	0
9530082P21Rik	11.761	7.76215	10.9272	11.1581	11.5443	23.616	9.36807	14.9145	13.5223	9.70476	12.9805	10.5672	9.34838	14.1564	8.20567	20.0496	10.1783	12.2211	12.6093	11.5993	8.91479	10.3753	9.0736	14.3067
9530091C08Rik	0	0	0	0	0	0	0	0	0	0	0	0	0	0	0	0	0	0	0	0	0	0	0	0
9630001P10Rik	0	0.302602	0	0	0	0	0	0	0	0	0	0	0	0	0	0	0	0	0	0	0	0	0	0
9630013A20Rik	0	0	0	0	0	0	0	0	0	0	0	0	0	0	0	0	0	0	0	0	0	0	0	0
9630028B13Rik	0	0	0	0	0	0	0	0	0	0	0	0	0	0	0.0851937	0	0	0	0	0	0	0	0	0
9630028H03Rik	0	0	0	0	0	0	0	0	0	0	0	0	0	0	0	0	0	0	0	0	0	0	0	0
9630033F20Rik	6.45964	6.43163	3.2449	4.74835	5.24346	0	8.2501	4.99143	4.85757	6.02875	3.44149	3.27279	5.38672	5.85307	6.63553	0	6.20308	5.68564	4.14086	4.22591	6.07896	4.11196	7.03279	3.77218
9830107B12Rik	0.0784733	0	0	0	0	0	0.107936	2.05506	0	0.0778645	0	0	0.0916487	0	0	0	0	0.0906469	0	0.278336	0	0	0	0
9830132P13Rik	0	0	0	0	0	0	0	0	0	0	0	0	0	0	0	0	0	0	0	0	0	0	0	0
9830147E19Rik	0	0	0	0	0.0481793	0	0	0	0	0.054815	0	0	0	4.49855	0	0.397143	0	0	0	0	0.0648888	0	0	0
9830166K06Rik	0	0	0.102661	0.0990546	0	0	0	0	0	0	0	0	0	0	0	0	0	0	0	0	0	0	0	0
9930012K11Rik	1.19273	1.58517	2.34415	1.68745	0.654043	0	2.63945	0.617403	1.06537	1.47406	2.22393	2.48545	1.23316	0	4.1306	0	3.02606	1.1961	2.20585	4.19277	1.4225	4.16101	3.79089	6.1567
9930014A18Rik	0.0687156	0.993037	1.26368	0.633685	0.710658	0	0	0	0.127684	1.20874	1.1582	0.868025	0.298236	0	0.110689	0	1.45132	0.523854	0.950513	1.46228	0.21928	3.58106	0	1.47019
9930021J03Rik	8.19677	6.2485	8.86705	7.10903	8.65652	3.71755	7.45166	7.56803	8.23991	5.96254	7.46271	5.77221	9.10905	7.30135	14.104	15.7184	5.87028	4.83585	8.11341	7.57582	9.33153	5.78438	12.5344	11.7107
9930104L06Rik	10.276	11.9529	14.6559	22.7932	11.3673	7.3677	8.64299	7.38574	15.8458	11.4364	12.1252	13.4554	10.22	7.02855	7.86375	4.07807	12.273	11.6215	14.743	25.8848	11.0131	14.3199	11.2423	4.23589
9930111H07Rik	0	0	0	0	0	0	0	0	0	0	0	0	0	0	0	0	0	0	0	0	0	0	0	0
9930111J21Rik1	0.0726343	0.987915	0	0	0.0634917	0	0.499173	0	0.104314	0.288067	0.0833536	0.193139	0.084733	0	0.521626	3.06449	0.0644167	0	0.153266	2.25109	0.171306	0.77563	1.72314	6.98883
9930111J21Rik2	0	0	0.0566168	0	0	0	0.0795646	0	0	0	0	0	0	0	0	0	0	0	0	0	0	0	0.0507977	0
A130010J15Rik	9.19948	6.9083	6.36812	5.53491	10.1955	6.24959	7.19299	2.98602	8.8491	5.51558	8.20722	5.42642	11.1344	1.61326	6.12495	2.83993	8.07198	6.16101	7.62877	4.99814	11.3665	12.4691	9.45396	2.10293
A130077B15Rik	0	0.109967	0.111386	0	0	0	0	0	0	0	0	0	0	0	0	0	0	0	0	0	0	0	0	0
A1bg	0	0	0	0	0	0	0	0	0	0	0	0	0	0	0	0	0	0	0	0	0	0	0	0
A1cf	0	0	0	0	0	0	0	0	0	0	0	0	0.170483	0	0	0	0.129555	0	0	0	0	0	0	0
A230001M10Rik	0	0	0	0	0	0	0	0	0	0	0	0	0	0	0	0	0	0	0	0	0	0	0	0
A230009B12Rik	0	0	0	0	0	0	0	0	0	0	0	0	0	0	0	0	0	0	0	0	0	0	0	0
A230020J21Rik	0.35317	0.569112	0	0	0	0	0.443929	0	0	0.406856	0.45355	0	0	0	0	0	0.601386	0	0	8.03109	0	0	0.522599	0
A230028O05Rik	0	0	0	0	0	0	0	0	0	0	0	0	0	0	0	0	0	0	0	0	0	0	0	0
A230046K03Rik	6.34569	4.86784	7.55045	6.49082	4.68347	6.75315	5.60681	2.69932	4.56361	5.33314	6.15746	6.27457	7.26303	9.63666	7.05019	3.47584	5.84266	3.62359	5.56469	6.76649	10.1937	9.46789	7.3136	6.16564
A230050P20Rik	20.5125	21.5324	12.7703	19.4736	19.2609	17.8542	18.2464	13.129	28.4472	23.5495	12.3738	17.9818	23.4571	13.5676	16.6505	7.47962	23.4786	15.2433	25.358	18.9545	23.3507	28.3482	22.4664	12.8988
A230056J06Rik	0	0	0	0	0	0	0	0	0	0	0	0.159385	0	0	0	0	0.0797599	0	0	0	0	0	0	0
A230056P14Rik	0	1.65555e-05	0	0	0.585079	0	0	4.30836	0	0	0	0	2.3073e-05	0	0.453616	2.06278	0	0.251796	0.000778157	1.15695	0	0	0	0
A230057D06Rik	0	0	0	0	0	0	0	0	0	0	0	0	0	0	0	0	0	0	0	0	0	0	0	0
A230065H16Rik	0	0.553359	0.588862	0	0	0	0.762507	0	0	0	0	0	0	0	0	0	0	0.64916	0.631407	0	0.759012	0	0	0
A230070E04Rik	0	0	0.158834	0	0	0	0	0	0	0	0	0	0	0	0	0	0	0	0	0	0	0	0	0
A230072C01Rik	1.18166	2.25992	3.32963	3.33677	2.96514	10.4858	3.56791	3.13626	1.46321	2.45583	4.29123	2.65849	2.59183	0	2.25611	0	2.53272	1.17382	3.08765	7.10077	2.09007	0.362544	2.66655	0
A230072E10Rik	0.424863	0.167229	0.337807	0.0816644	0.451516	0	0.236397	1.34929	0.0681316	0.0853481	0.0987361	0.0761896	0.291227	0	0.353484	0	0.304914	0	0.272578	0	0	0	0.0756326	0
A230073K19Rik	0	0.037456	0.0432721	0.109402	0	0	0	0	0	0	0	0	0.0907137	0	0.0839478	0	0.0364486	0	0.0813825	0	0.047777	0	0.10127	0
A230077H06Rik	0	0	0	0	0	0	0	0	0	0	0	0	0	0	0	0	0	0	0	0	0	0	0	0
A230103J11Rik	3.23681	4.93352	1.84219	4.01952	2.19783	23.2734	3.61059	7.15291	4.08933	4.7232	1.35587	5.7795	1.80844	0	3.66606	0	3.75711	2.05874	2.67668	4.02377	3.4445	1.53882	2.82245	4.34086
A230108P19Rik	0.115555	0	0	0	0.101213	0	0	0	0	0	0	0	0	0	0	0	0	0	0	0	0	0	0	0
A2m	0	0	0	0	0	0	0	0	0	0	0	0	0	0	0	0	0	0	0	0	0	0	0	0
A330009N23Rik	0.718378	0.689092	0	0	0.422108	0	1.02821	0	0.530066	0	0.549474	0.796958	0.28729	0	0.365167	0	0.84067	0.543472	1.21516	0.832189	0.978302	0	1.6722	0
A330021E22Rik	0	0	0	0	0	0	0	0	0	0	0	0	0	0	0	0	0	0	0	0	0	0	0	0
A330023F24Rik	0.106191	0.206963	0.260394	0.808922	0.278151	0.161735	0.51289	0	0.0763384	0	0.243713	0.141722	0	0	0.109137	0	0	0	0.224169	0.566404	0.187271	0	0.280447	1.44627
A330032B11Rik	0	0	0.152493	0	0	0	0	0	0	0	0	0	0	0	0	0	0	0	0	0	0	0	0	0
A330033J07Rik	0	0	0	0	0	0	0	0	0	0	0	0	0	0	0	0	0	0	0	0	0	0	0	0
A330035P11Rik	0.847524	1.02774	1.45626	0.100349	0.556476	3.86312	0.725647	0	0.303626	0.524875	0.850946	0.93535	0.869959	0	1.41386	0	0.656169	0.609972	0.895171	0	0.627676	1.36132	0.930349	0
A330040F15Rik	0.296628	0.566352	0.584664	0	0.52444	0	0.395949	0	0.420063	0	0	0	1.07817	0	2.12313	0	0	0	0.628154	1.02369	1.08536	0	0.258227	0
A330041J22Rik	0	0	0	0	0	0	0	0	0	0	0	0	0	0	0	0	0	0	0	0	0	0	0	0
A330048O09Rik	0	0	0	0	0	0	0	0	0	0	0	0	0	0	0	0	0	0	0	0	0	0	0	0
A330049N07Rik	0	0	0	0	0	0	0	0	0	0	0	0	0	0	0	0	0	0	0	0	0	0	0	0
A330050F15Rik	0	0	0	0	0	0	0	0	0	0	0	0	0	0	0	0	0	0	0	0	0	0	0	0
A330069E16Rik	1.17043	1.10869	1.92598	1.43773	1.03964	0	0.514318	0	2.19728	1.90519	2.68544	3.30806	1.92168	0	1.99073	0	3.05317	1.74249	2.48156	4.99258	3.37947	0	0.676385	0
A330070K13Rik	0	0	0	0	0	0	0	0	0	0	0	0	0	0	0	0	0	0	0	0	0	0	0	0
A330074K22Rik	0	0	0	0	0	0	0	0	0	0	0	0	0	0	0	0	0	0	0	0	0	0	0	0
A330076C08Rik	0	0	0	0	0	0	0	0	0	0	0	0	0	0	0	0	0	0	0	0	0	0	0	0
A330076H08Rik	0	0	0	0	0	0	0	0	0	0	0	0	0	0	0	0	0	0	0	0	0	0	0	0
A330093E20Rik	0	0	0	0	0	0	0	0	0	0	0	0	0	0	0	0	0	0	0	0	0	0	0	0
A330102I10Rik	0	0	0	0	0	0	1.33192	0	0.869287	0	0	0	0	0	0.636038	0	0.536885	0	1.998	0	0	0	1.07435	0
A3galt2	0	0	0	0.237199	0.0728286	0	0	0	0	0	0.0955691	0	0	0	0.171083	0	0.0737959	0.0961459	0	0	0.098357	0	0	0
A430005L14Rik	51.8765	74.8176	62.3343	62.3137	74.8749	51.6418	68.3534	70.0802	62.5786	59.1941	66.2119	69.781	63.7782	32.4659	52.9958	74.9238	72.4995	65.543	71.3398	57.1613	56.9874	61.7188	70.4431	31.0383
A430033K04Rik	6.32527	5.00324	6.74081	4.80053	5.45406	0.13739	5.95455	5.85287	6.4807	5.19732	5.80653	5.67721	12.7932	1.47395	6.21727	7.75503	6.00229	5.31588	6.67953	2.31874	5.76859	6.76849	7.30574	4.14063
A430035B10Rik	0.153721	0.297046	1.05751	0.579683	0	0	0	0	0.219627	0.303895	0.352766	0.134785	0.181778	8.92076	0	0	0	0.352176	0.812314	1.61952	0.366922	1.3197	0.404095	0
A430078G23Rik	7.38088	7.35254	6.30459	6.36208	8.1358	5.24548	10.1253	9.70545	9.75883	7.41243	6.70955	6.61091	8.8686	9.90319	7.0867	0	6.02563	8.95084	5.77019	8.73037	8.61949	10.465	8.42177	14.4623
A430088P11Rik	0.447369	0.933923	0.188098	0.425482	0.545773	0	0.440262	0	0.275429	0.317277	0.293305	0	0.148859	0	0.0656213	0	0.340178	0.369685	0.202355	0	0.752543	1.3661	0.618565	0
A430089I19Rik	0	0	0	0	0	0	0	0	0	0	0	0	0	0	0	0	0	0	0	0	0	0	0	0
A430090L17Rik	0	0	0	0	0.0664107	0	0	0	0	0	0.0871802	0	0	0	0	0	0	0	0	0	0.0896253	0	0	0
A430093F15Rik	2.3648	18.5705	5.19349	3.67729	6.83122	0	11.0024	20.0486	4.77425	5.09136	10.5346	7.45592	11.6506	0	8.27701	3.83503	20.8814	4.78807	6.46753	7.21858	13.0867	12.5312	12.1974	8.9127
A430105I19Rik	0	0.114344	0.115159	0.111721	0	0	0	0	0.168725	0	0.134712	0.0521818	0	0	0	0	0.156266	0	0.185878	0	0	0	0.0516591	0
A430107P09Rik	1.17772	8.10741	0.128546	0.123645	16.7469	0	0	0	0.936141	0.517999	0	0	39.1542	3.55891	0	0	8.90178	0.751375	0.414777	0.921692	31.128	23.5675	0.459141	0
A4galt	0	0	0	0	0	0	0	0	0	0.139246	0	0	0	0	0	0	0	0	0	0	0	0	0.123429	0
A4gnt	0	0	0	0	0	0	0	0	0	0	0	0	0	0	0	0	0	0	0	0	0	0	0	0
A530006G24Rik	0	0	0	0	0	0	0	0	0	0	0	0	0	0	0	0	0	0	0	0	0	0	0	0
A530013C23Rik	0	0	0	0	0	0	0	0	0	0	0	0	0	0	0	0	0	0	0	0	0	0	0	0
A530016L24Rik	0	0	0	0	0	0	0	0	0	0	0	0	0	0	0	0	0	0	0	0	0	0	0	0
A530032D15Rik	0	0	0	0	0	0	0	0	0	0	0	0	0	0	0	0	0	0	0	0	0	0	0	0
A530046M15Rik	0	0	0	0	0	0	0	0	0	0.393379	0	0	0	0	0	0	0	0	0	0	0	0	0	0
A530050N04Rik	0	0	0	0	0	0	0	0	0	0	0	0	0	0	0	0	0	0	0	0	0	0	0	0
A530053G22Rik	0	0	0	0	0	0	0	0	0	0	0	0	0	0	0	0	0	0	0	0	0	0	0	0
A530054K11Rik	6.18388	5.5065	10.144	7.30945	8.09893	12.3412	10.9609	11.7631	6.97466	4.8729	8.25844	6.26068	8.55523	0	13.0395	4.26493	6.24668	3.45776	9.50931	9.76215	10.279	6.83398	15.158	2.95994
A530058N18Rik	0	0	0	0	0	0	0	0	0	0	0	0	0	0	0	0	0	0	0	0	0	0	0	0
A530064D06Rik	0.176094	0.454424	0	0	0	0	0	0	0.251241	0	0	0	0.209015	0	0	0	0.155127	0	0	0	0	0	0.154139	0
A530065N20Rik	0	0	0	0	0	0	0	0	0	0	0	0	0	0	0	0	0	0.0869359	0	0	0	0	0	0
A530072M11Rik	0.161108	0.155564	0	0	0.282877	0	0	0	0	0	0.369718	0	0	0	0.165203	0	0	0.368803	0	0	0.577475	0	0.423372	3.31827
A530088E08Rik	2.23311	2.08845	2.40713	2.08829	2.02857	0	2.93365	7.8508	3.94455	1.19183	0.848316	1.78882	3.8479	3.43512	2.71308	0	2.50316	1.57222	1.53194	2.40583	3.42246	1.44712	5.99435	0
A530099J19Rik	0	0.702702	0	0.294062	0.0905606	0.157208	0.141776	0	0	0.41011	0	0	0.242633	3.00051	0	25.9177	0	0	0	22.9405	0	15.065	0	54.2975
A630001G21Rik	13.8028	16.8929	22.0053	21.9777	19.3806	38.1324	17.951	8.25087	13.3665	12.2795	18.6533	20.1719	22.6682	30.0377	22.964	27.8342	21.3779	13.0008	24.637	20.0633	25.8067	40.8153	19.8895	15.3388
A630007B06Rik	1.55551	2.0124	1.52722	0.982484	1.54317	7.24849	0.994732	0	1.63486	0.924903	1.30893	1.00746	1.21607	0	0.638784	3.69932	3.67076	1.075	1.2048	2.65664	1.35124	0.888268	1.45723	7.65154
A630010A05Rik	0	0	0	0	0	0	0	0	0	0	0	0	0	0	0	0	0	0	0	0	0	0	0	0
A630012P03Rik	0	0	0	0	0	0	0	0	0	0	0	0	0	0	0	0	0	0	0	0	0	0	0	0
A630019I02Rik	0.453062	0.0925386	0	0	4.7202e-05	0	0.0415199	0	0	0.151274	0	0	0	2.41835	0.618127	0	0.141429	0.0391675	0	0	0.311882	0	0.78727	0.978858
A630020A06	0	0	0	0.0758946	0.0698717	0	0	0	0	0	0.0917049	0.0708268	0.0933474	0	0.0820881	0	0	0	0	0	0	0.341908	0.070266	0
A630023A22Rik	0	0	0	0	0	0	0	0	0	0	0	0	0	0	0	0	0	0	0	0	0	0	0	0
A630023P12Rik	0.611892	0.569152	0.606756	0.551938	0.549754	0	0	0	0	0.590994	0.701821	0	0.783647	0	0	0	0	0	3.25257	0	1.56796	0	1.57538	0
A630033H20Rik	4.73791	2.72563	7.37724	1.62338	5.07719	0	6.6564	7.05083	5.43537	3.39508	8.95101	3.02813	8.87649	0	11.1897	11.2539	2.86387	1.75449	5.12345	4.63391	11.7045	3.46153	9.07509	8.31557
A630066F11Rik	2.29444	2.47354	3.12613	4.94637	2.02397	21.9295	1.71108	0	3.98153	2.57963	2.40918	3.04227	0.934204	0	2.60904	3.34413	1.80485	4.33243	3.8887	1.98962	1.25099	0	0.889427	0
A630072M18Rik	1.3121	1.52128	4.08094	7.57358	1.63326	0	3.68946	0	1.10624	2.21199	4.2408	5.78069	2.02124	1.56809	2.3487	1.10716	1.39132	1.37633	4.82272	5.12551	2.05032	3.11118	2.95735	0.690803
A630073D07Rik	0	0	0	0	0	0	0	0	0	0	0	0	0	0	0	0	0	0	0	0	0	0	0	0
A630075F10Rik	0	0	0	0	0	0	0	0	0	0	0	0	0	0	0	0	0	0	0	0	0	0	0	0
A630076J17Rik	0	0	0	0	0	0	0	0	0	0	0	0	0	0	0	0	0	0	0	0	0	0	0	0
A630077J23Rik	0	0	0	0	0	0	0	0	0	0	0	0	0	0	0	0	0	0	0	0	0	0	0	0
A630089N07Rik	5.79074	4.13515	3.25099	1.17167	5.92404	0	11.659	22.0197	7.49291	4.09185	2.37305	2.42336	6.50429	3	15.8421	9.34188	6.45296	3.48065	2.76803	4.73009	8.7004	5.02697	12.5737	14.6784
A630095E13Rik	0	0	0	0	0	0	0	0	0	0	0	0	0	0	0	0	0	0	0	0	0	0	0	0
A630095N17Rik	0	0.565382	1.20501	0	0.5458	0	0	0	0	1.17381	2.09091	0	0	0	0	0	0.521452	0	0.645953	0	0	0	1.04316	0
A730006G06Rik	0	0	0	0	0	0	0	0	0	0	0	0	0	0	0	0	0	0	0	0	0	0	0	0
A730008H23Rik	39.5755	33.7125	39.9779	58.2346	27.8217	58.456	49.7216	80.9426	40.7188	37.2221	38.1189	57.7075	28.6429	0	51.6053	56.9665	33.3417	38.6169	36.305	33.9449	30.6038	56.9808	47.7307	56.0341
A730017C20Rik	0	0	0	0	0	0	0	0	0	0	0	0	0	0	0	0	0	0	0	0	0	0	0	0
A730017L22Rik	4.04077	2.84691	6.37405	5.32658	5.04249	4.6476	7.02921	0	4.38218	3.63688	5.33913	5.17683	6.04971	3.77391	6.40874	5.22399	3.67995	3.23718	5.56245	4.20885	5.81816	4.72383	7.19913	2.28371
A730018C14Rik	0	0	0	0	0	0	0	0	0	0	0	0	0	0	0	0	0	0	0	0	0	0	0	0
A730020E08Rik	0	0	0	0	0	0	0	0	0	0	0	0	0	0	0	0	0	0	0	0	0	2.35702	0	0
A730020M07Rik	0	0	0	0	0	0	0	0	0	0	0	0	0	0	0	0	0	0	0	0	0	0	0	0
A730036I17Rik	0	0	0	0	0	0	0	0	0	0	0	0	0	0	0	0	0	0	0	0	0	0	0	0
A730043L09Rik	0	0	0	0	0	0	0	0	0	0	0	0	0	0	0	0	0	0	0	0	0	0	0	0
A730046J19Rik	0	0	0	0	0	0	0	0	0	0	0	0	0	0	0	0	0	0	0	0	0	0	0	0
A730056A06Rik	0	0	0	0	0	0	0	0	0	0	0	0	0	0	0	0	0	0	0	0	0	0	0	0
A730082K24Rik	0	0	0	0	0	0.253297	0	0	0	0	0	0	0	0	0	0	0	0	0	0	0.199889	0	0	0
A730085K08Rik	0	2.06569	0.744108	0	1.35411	0	0	0	1.03118	0	0	0	0.981875	0	0.758182	0	0	0	0	0	0.979077	0	1.91535	0
A730090H04Rik	0	0	0	0	0	0	0	0	0	0	0	0	0	0	0	0	0	0	0	0	0	0	0.15974	0
A730090N16Rik	0	0	0.222422	1.4809	0.199067	0	0.304564	0	0	0	0.259306	0.392237	0	0	0.462862	0	0.198497	0.256852	0	0	0	0	0.19738	0
A730098P11Rik	33.9553	24.9461	36.5099	29.73	30.8166	32.2197	34.217	30.3876	30.8	25.7014	31.9582	30.5425	27.6547	39.2024	32.0348	29.5207	27.8602	27.4799	34.5399	25.3275	26.5108	24.717	30.0796	19.3003
A830009L08Rik	0	0	0	0	0	0	0	0	0	0	0	0	0	0	0	0	0	0	0	0	0	0	0	0
A830010M20Rik	1.21355	1.65741	1.15036	1.58124	1.65893	0	1.78945	1.39711	1.22232	1.20654	1.20692	1.08303	1.40829	3.87828	1.20597	1.45976	1.11409	0.891487	1.62222	1.98095	1.94626	1.72757	1.71031	1.99589
A830018L16Rik	0	0	0	0	0	0	0	0	0	0	0	0	0	0	0	0	0	0	0	0	0	0	0	0
A830019L24Rik	0	0	0	0	0	0	0	0	0	0	0	0	0	0	0	0	0	0	0	0	0	0	0	0
A830052D11Rik	0	0	0	0	0	0	0	0	0	0	0	0	0	0	0	0	0	0	0	0.24927	0	0	0	0
A830080D01Rik	7.36848	5.20854	9.36833	8.34623	8.85982	0.764104	6.09812	12.8723	8.29078	6.56207	9.12786	5.48835	9.88446	11.533	9.80404	9.59311	6.89972	5.79948	8.48782	10.3814	13.9438	9.31563	10.894	3.49178
A830082K12Rik	0	0	0	0	0	0	0	0	0	0	0	0	0	0	0	0	0	0	0	0	0	0	0	0
A830082N09Rik	0.277825	0.13558	0.442663	0.298159	0.545283	0	0.528508	0	0.399905	0.483528	0.797039	0.402765	0.6442	0	0.392759	0	0.246914	0.483685	0.403116	0.804521	0.773656	0.815513	0.367175	0
A930001A20Rik	0	0	0	0	0	0	0	0	0	0	0	0	0	0	0	0	0	0	0	0	0	0	0	0
A930001C03Rik	0	0	0	0	0	0	0	0	0	0	0	0	0	0	0	0	0.327905	0	0	0	0	0	0	0
A930003A15Rik	0	1.10969	0	0.608408	0	0	0	0	0	0.321551	0	0.280716	0	0	0	0	2.581	0	0	0	0	0	0	0
A930003O13Rik	2.02443	0.0264697	0.368525	0.399292	0	0	0	0	0.669702	0.42847	0.524281	0.17634	0.180062	0	0	0	0	0	0.482895	2.00612	0	0	0	0
A930004D18Rik	0.586907	0.94316	0.546804	1.67712	0.838152	0	1.99912	0	1.38762	0.498973	0.673833	1.0509	1.39387	3.50602	1.48016	0	1.32413	0.538558	0.292459	1.94453	1.1372	0	1.3031	0
A930005H10Rik	26.7825	31.1584	21.2771	28.7877	27.1904	8.54255	30.0077	30.8033	27.8534	27.785	22.964	27.6515	30.952	24.4758	32.3778	16.1654	33.1874	32.5232	23.8035	30.1764	20.8002	37.9167	34.9076	12.2567
A930006I01Rik	0	0	0	0	0	0	0	0	0	0	0	0	0	0	0	0	0	0	0	0	0	0	0	0
A930006K02Rik	5.1578	3.53019	4.17294	10.7182	2.50914	0	4.89391	0	2.62807	4.10519	5.37876	5.11234	6.4399	0	4.77723	0	5.68079	2.59591	4.47823	6.34057	3.52461	2.04178	5.67006	0
A930007I19Rik	0	0	0	0.475562	0	0	0	0	0	0	0	0.110717	0	0	0.387162	0	0.111141	0	0.132866	0	0.149465	0	0.441365	0
A930009A15Rik	0	0	0	0	0	0	0	0	0	0	0	0	0	0	0	0	0	0	0	0	0	0	0	0
A930011G23Rik	0	0	0	0	0	0	0	0	0	0	0	0	0	0	0	0	0	0	0	0	0	0	0	0
A930011O12Rik	0	0	0	0	0	0	0	0	0	0.0686848	0	0	0	0	0	0	0	0	0	0	0	0	0	0
A930012L18Rik	0	0	0	0	0	0	0	0	0	0	0	0	0	0	0	0	0	0	0	0	0	0	0	0
A930013F10Rik	4.91136	5.57146	8.1177	12.6908	4.19774	0	2.94819	8.22204	6.17436	4.98176	7.42247	8.86618	6.19744	0	2.08998	6.81736	6.45998	4.26968	7.59278	18.3763	7.82316	5.64753	3.88979	0
A930015D03Rik	19.8916	29.3971	11.1723	18.6311	20.5453	75.7334	21.2801	17.8878	20.9259	31.2509	17.6325	11.7813	19.6974	16.4433	27.6455	8.09094	23.1058	29.5863	20.1448	33.3073	13.5571	25.5719	21.1023	22.7029
A930016O22Rik	0.857032	0.991888	1.90707	1.92111	1.1323	0	1.2649	6.05954	1.37535	1.49145	2.17567	1.52398	2.89261	11.0154	1.30138	0	1.24741	1.35568	1.19509	3.28713	1.72794	0	1.14499	1.99106
A930017M01Rik	0	0	0	0	0	0	0	0	0	0	0	0	0	0	0	0	0	0	0	0	0	0	0	0
A930018P22Rik	0	0	0	0	0	0	0	0	0	0	0	0	0	0	0	0	0	0	0	0	0	0	0	0
A930019D19Rik	0	0	0	0	0	0	0	0	0	0	0	0	0	0	0	0	0	0	0	0	0	0	0	0
A930024E05Rik	0.630622	3.50231	0.92971	1.33716	1.52221	0	1.07223	2.60804	1.35116	0.467417	1.08539	0.828941	2.23865	0	2.26344	0	2.08578	0.902588	1.49967	0	1.50615	4.3996	2.20994	6.17295
A930041C12Rik	1.63038	0.746006	0	2.16473	0.739794	0	0	0	0	0.779495	0	0.652649	0	0	0	0	0.691065	0	1.73734	6.61878	1.07681	0	0	0
AA387883	0	0	0	0	0	0	0	0	0	0.178343	0	0	0	0	0	0	0	0	0	0	0	0	0	0
AA388235	1.30501	0.846405	2.70329	3.6518	1.77418	0	0	0	2.08223	1.58319	3.74376	1.9297	1.6916	0	0	0	1.73564	1.34073	2.9852	2.57181	1.96612	0	0	0
AA413626	2.79061	1.22378	1.40288	1.17545	2.59007	0	0	0	1.85447	1.29939	6.38512	0	4.04518	0	4.19317	0	1.14661	4.23535	4.4806	4.26311	7.8958	0	1.16067	0
AA414768	6.73543	6.14122	11.8141	11.2952	7.51924	0	7.15688	15.5634	10.6447	8.80426	12.95	16.3734	10.5983	8.91585	5.41091	4.12644	8.6571	8.31525	11.3552	11.945	6.54559	8.60647	6.21289	3.36333
AA415398	0.94145	1.2125	0.771075	0.739398	0.826332	0	1.28071	5.51645	0	0.310146	1.08024	0.962617	2.04211	0	1.44819	0	0.968795	0.179677	1.32671	0	0.749421	2.69452	2.19954	0
AA465934	4.46209	6.48319	4.49301	4.97645	2.76819	0	0	0	1.96775	2.75976	1.70079	9.89409	10.9079	0	1.48807	0	7.30149	1.4933	7.04234	0	4.24346	0	3.7008	0
AA467197	1.84849	6.8751	1.22208	2.22227	0	0	0.78864	16.6645	0	0.594992	1.41343	0	1.57943	0	0	0	0	4.70241	0.655089	8.18917	0	0	0.52869	0
AA474331	3.71821	7.00079	4.13598	10.6283	6.63092	12.5061	3.03349	0	5.86275	8.14002	4.79842	7.41052	5.79886	10.9896	1.42071	0	7.24159	6.69305	5.42507	8.25299	5.23713	11.1291	2.81068	6.85171
AA536875	0	0	0	0	0	0	0.428103	0	0	0	0	0	0	0	0	0	0	0	0	0	0	0	0	0
AA543186	0.178601	0.6888	0.878048	0.33593	0.784677	0	0.242242	0	0.509559	1.23422	1.22956	0.312081	0.42417	0	0.183073	0	1.10126	0.204032	0.377638	2.97017	1.06978	0	0.625285	0
AA543401	0	0	0	0	0	0	0	0	0	0	0	0	0	0	0	0	0	0	0	0	0	0	0	0
AA545190	0	0	0	0	0	0	0.428184	0	0	0	0	0	0	0	0	0	0	0	0	0	0	0	0	0
AA619741	0	0	0	0	0	0	0	0	0	0	0	0	0	0	0	0	0	0	0	0	0	0	0	0
AA792892	0	0	0	0	0	0.399556	0	0	0	0	0	0	0	0	0	0	0	0	0	0	0	0	0	0
AA986860	0.19633	0.381176	0.19274	0	0.17181	0	0.269244	0	0	0.194619	0.225285	0.520609	0.345029	0	0.302379	0	0.0869004	0	0.103674	0	0.348561	0	0.172475	0
AA987161	8.47676	4.12876	12.3603	5.8331	8.45313	12.8209	9.79504	12.5703	8.15031	5.34816	9.39862	4.32892	10.7973	13.1794	15.1857	10.9436	5.08316	4.17755	10.701	7.42988	10.1743	10.2812	12.6532	5.15697
AB041803	0	0.559328	4.16933	1.08498	1.07895	0	0	0	0.835109	0.580591	2.06728	0.494878	0	0	0	0	0	0.656061	0.638622	0	0	0	0.515854	0
AB124611	30.4825	36.4783	32.3503	27.4514	38.031	6.3427	62.7217	100.266	24.2391	24.0227	32.2598	26.9942	36.4018	18.6047	51.8948	38.2696	29.015	26.7714	30.8708	23.9034	34.1166	22.1046	53.3836	90.5591
AF067063	0	0	0	0	0	0	0	0	0	0	0	0	0	0	0	0	0	0	0	0	0	0	0	0
AF251705	0	2.18199	0.281243	1.32824	0	0	0	6.65711	0.404497	0.840776	0	0	0	0	0.583862	0.219071	0	0.322318	0	2.71262	0.347543	0	0	14.4152
AF357355	0	0	0	0	0	0	0	0	0	0	0	0	0	0	0	0	0	0	0	0	0	0	0	0
AF357359	0	0	0	0	0	0	0	0	0	0	0	0	0	0	0	0	0	0	0	0	0	0	0	0
AF357399	0	0	0	0	0	0	0	0	0	0	0	0	0	0	0	0	0	0	0	0	0	0	0	0
AF357425	0	0	0	0	0	0	0	0	0	0	0	0	0	0	0	0	0	0	0	0	0	0	0	0
AF357426	0	0	0	0	0	0	0	0	0	0	0	0	0	0	0	0	0	0	0	0	0	0	0	0
AF366264	0	0	0	0	0	0	0	0	0	0.198499	0	0	0	0	0	0	0	0.11538	0	0	0	0	0	0
AF529169	0	0	0	0	0	0	0	0	0	0	0	0	0	0	0	0	0	0	0	0	0	0	0	0
AI115009	0.322609	1.09026	0	0.303914	0	0	0	0	0.230353	0.159382	0.370168	0	0	0	0	0	1.13791	0.553866	0.511484	0	0	0	0	0
AI118078	0	0.349468	0	0	0	0	0.49312	0	0.172128	0	0.275905	0	0	0	0	0	0.212566	0.27645	0.254013	0	0.142765	0	0	0
AI182371	0.179569	0.514536	0.176626	0.506751	0.789254	0	0.243606	0	0.761272	0.34435	0.609341	1.08596	0.213346	0	1.28888	0	0.474665	0.205186	0.189911	1.41486	0.626252	0	0.314432	6.64549
AI197445	0	0	0	0	0	0	0	0	0	0	0	0	0	0	0	0	0	0	0	0	0	0	0	0
AI314180	9.05118	8.19504	10.8241	12.3207	10.3586	12.7344	8.41993	7.18943	8.83433	10.465	10.0155	11.0225	10.3525	10.6251	8.63909	10.0252	9.22776	10.9201	11.356	14.2163	9.70844	12.132	6.79119	5.2793
AI314278	0	0	0	0	0	0	0	0	0	0	0	0	0	0	0	0	0	0	0	0	0	0	0	0
AI317395	0	0	0	0	0	0	0	0	0	0	0	0	0	0	0	0	0	0	0	0	0	0	0	0
AI413582	18.6148	16.7257	20.9232	21.2513	8.92361	43.2913	17.4623	0	13.7836	27.556	29.1788	14.273	11.1423	7.90937	15.1247	4.04833	18.091	19.6095	11.8751	29.8793	6.36848	50.3331	36.1966	7.74633
AI414108	0.171049	0.499887	0.783005	0.542699	0.199167	0	0.0786379	0	0.245866	0.566388	0.785129	1.014	0.33173	0.929751	0.17578	0	1.26506	0.330062	0.541655	0.557272	0.402435	0	0.200735	0
AI427809	0	0.42207	0	0	0	0	0	0	0	0.143865	0	0	0	0	0	0	0.128406	0.166805	0	0.767328	0	0	0	0
AI429214	1.06248	0.880047	2.23743	1.14497	1.99782	0	1.23974	0	1.3013	0.900279	1.74159	2.12996	1.61485	0	1.5567	0	1.60704	0.521714	3.0478	2.79909	2.71642	0	1.19711	5.79196
AI450353	3.70737	4.16064	9.52329	6.95446	7.31362	31.463	6.95794	17.3333	5.27967	4.94376	8.5075	3.45835	10.6739	0.747407	8.75173	5.77111	3.62242	5.24343	7.96779	8.80393	11.8924	26.586	9.72246	2.73805
AI462493	56.5838	77.7137	43.6256	40.133	49.5978	14.7624	44.9782	65.5263	56.6006	67.6913	44.7492	49.8906	42.5146	41.3086	31.9087	46.5364	54.2924	76.2677	48.1937	40.7708	44.8269	56.8272	35.6098	26.2627
AI463170	0	0	0	0	0	0	0	0	0	0	0	0	0	0	0	0	0	0	0	0	0	0	0	0
AI464131	0	0.195192	0	0	0	0	0.368277	0	0	0.132739	0	0	0	0	0	0	0	0	0	0	0	0	0.117617	0
AI467606	77.0505	87.9414	36.336	27.5284	71.1683	55.5766	101.457	140.586	81.4458	81.0687	47.0567	40.5805	67.4352	77.7551	112.155	134.207	78.7937	76.3258	44.8216	34.3621	59.1564	49.0147	116.51	123.775
AI504432	11.6746	9.15245	18.8565	12.3034	14.0079	11.4271	14.9522	4.90964	10.3591	8.78765	13.3399	8.4024	18.1298	15.3009	26.1433	10.8576	9.61616	3.51143	12.5842	14.0499	29.0137	10.082	27.1192	7.23847
AI506816	69.8357	59.5107	158.241	161.404	78.6256	186.806	46.8196	67.47	61.9259	59.9058	131.524	141.667	74.9764	51.2934	64.0234	16.5912	88.3963	58.0411	157.044	172.749	79.4017	116.618	61.7598	36.4685
AI507597	0	1.85881	0	0	0	0	0	0	0	0	0	0	0	0	0	0	1.17187	0	0	0	0	0	0.351943	0
AI593442	0	0.0475076	0	0	0	0	0	0	0	0	0	0	0	0	0	0	0	0	0	0	0	0	0	0
AI597468	10.7691	8.30804	12.5349	10.4444	9.60745	14.5779	8.78824	9.72305	10.8772	9.43516	11.4201	7.97094	10.6603	6.32561	11.2918	2.0717	8.69144	6.95171	12.7029	7.44098	14.6279	12.0712	9.92822	7.52193
AI597479	22.5193	17.2117	27.225	20.6849	22.6153	25.1936	16.5982	27.3139	23.1857	19.9944	23.6874	18.0732	23.9277	18.779	26.9014	20.716	17.7142	15.6386	24.0363	20.3095	34.8724	24.2623	25.3933	15.4015
AI606473	0	0	0	0	0	0	0	0	0	0	0	0	0	0	0	0	0	0	0	0	0	0	0	0
AI607873	0	1.88629	0.0793391	0	0	0	0	0	0	0.401054	0	0	0.0944447	0	0	0.386127	0	0.186707	0.170724	4.79857	0.0954399	5.01539	0.0710781	6.07119
AI646519	0	0	0	0	0	0	0	0	0	0	0	0	0	0	0	0	0	0	0	0	0	0	0	0
AI661453	0	0.107027	0.0538737	0	0	0	0	0	0	0	0	0	0.0638886	0	0	0	0	0	0	0	0	0.352071	0	0
AI662270	345.421	332.483	468.829	365.146	341.203	301.337	318.386	348.922	345.052	361.841	389.975	346.065	367.099	358.586	385.706	218.138	348.961	376.669	426.476	340.452	401.004	286.306	333.441	137.25
AI747448	0	0	0	0	0	0	0	0	0	0	0	0	0	0	0	0	0	0	0	0	0	0	0	0
AI836003	0	0.121285	0	0	0	0	0	0	0	0	0	0	0	0	0	2.86771	0	0	0	0.330992	0	1.61055	0	3.11268
AI837181	58.8742	73.8779	61.8747	68.2586	51.9749	62.3237	47.0115	56.7616	54.6795	59.0535	63.1792	70.1811	56.0435	71.099	47.9667	64.5004	67.8822	63.6576	54.2692	71.3942	49.2778	40.1983	45.6853	63.3448
AI839979	0.275635	0.790791	0.543062	0.513539	0.2434	0	0	0	0	0	0.316238	0	0.332753	0	0	0	0	0.311577	0.875307	3.33782	0	0	0.240181	5.01883
AI846148	8.66409	14.1975	6.4874	8.50847	7.97814	17.0619	9.71102	8.197	8.3226	8.77972	6.02989	9.48992	7.95818	0	8.12887	11.6086	10.8851	9.4183	9.25156	8.03905	5.19267	10.5845	7.15956	7.0547
AI847159	1.00087	0	1.31611	0	0.88645	2.5084	0.886258	0	0	0	0.7655	0.570257	1.2204	0	2.72694	0	0	0.749553	0.706833	0	0.409235	0	4.05919	10.0344
AI848285	0.166267	0	0.163443	0.156555	0	0	0	0	0	0	0	0	0.197029	0	0.170474	0	0	0	0	0	0.198809	0	0.145608	0
AI854517	0	0	0	0	0	0	0	0	0	0	0	0	0	0	0	0	0	0	0	0	0	0	0.0706742	0
AI854703	8.03518	9.0386	3.78801	5.91074	7.50684	0	14.2985	25.0638	9.38554	8.98922	6.41809	10.6137	5.70382	9.56496	7.76813	3.01113	11.7996	6.551	5.07373	6.49197	6.69383	8.08822	8.8661	6.73975
AI987944	8.09606	6.17877	9.5297	4.49825	9.16566	6.39725	9.16786	11.474	7.25346	4.38034	8.66997	6.57563	10.3951	4.30585	16.0696	6.84207	7.65055	3.72911	10.0345	6.57777	12.9232	5.31887	11.4703	10.0917
AK010878	22.2284	17.525	22.7431	13.1257	18.1695	0	12.666	36.26	19.9378	19.1233	16.5568	18.815	21.4049	34.6001	19.3166	23.1028	20.9801	19.1347	19.6351	24.5782	22.7246	31.3289	15.6128	0
AK129341	0	0.149616	0.0754848	0	0	0.702179	0	0	0.110431	0.152671	0.088269	0	0	0	0.316069	0	0.0681854	0.0888637	0.081217	0	0.0907575	0	0	0
AU015228	0	0	0	0	0	0	0	0	0	0	0	0	0	0	0	0	0	0	0	0	0	0	0	0
AU015791	0	0	0	0	0	0	0	0	0	0	0	0	0	0	0	0	0	0	0	0	0	0	0	0
AU015836	0	0	0	0	0	0	0	0	0	0	0	0	0	0	0	0	0	0	0	0	0	0	0	0
AU016765	0	0	0	0	0	0	0	0	0	0	0	0	0	0	0	0	0	0	0	0	0	0	0	0
AU018091	0	0	0	0	0	0	0	0	0	0	0	0	0	0	0	0	0	0	0	0	0	0	0	0
AU018829	0	0	0	0	0	0	0	0	0	0	0	0	0	0	0	0	0	0	0	0	0	0	0	0
AU019823	24.1234	20.0471	36.6436	25.8097	28.0296	28.1311	20.4938	23.796	25.1958	22.1503	33.5503	25.8165	29.7819	30.5884	28.5404	17.2891	21.0701	22.7261	37.4433	25.5859	30.2091	32.1002	31.6947	15.4592
AU019990	0	0	0	0	0	0	0.195125	0	0	0	0	0	0	0	0	0	0	0	0	0	0	0	0	0
AU021063	0	0	0.709556	3.19029	0	0	0.729442	0	0.436126	0	0	0	0	0	1.81727	0	0	0	0	0	0.577355	0	0	0
AU021092	0	0	0	0	0	0	0	0	0	0	0	0	0	0	0	0	0	0	0	0	0	0	0	0
AU022252	7.19299	7.25491	4.55617	6.77713	5.33215	0	6.52074	13.0516	4.10919	6.47599	4.95203	5.74125	5.6764	0	7.04817	0	6.20239	4.02555	3.71686	2.24368	5.72835	6.86326	7.28129	4.4454
AU022751	0	0	0	0	0	0	0	0	0	0	0	0	0	0.29524	0	0	0	0	0	0	0	0	0	0
AU022754	0	0	0	0	0	0	0	0	0	0	0	0	0	0	0	0	0	0	0	0	0	0	0	0
AU022793	0	0	0	0	0	0	0	0	0	0	0	0	0	0	0	0	0	0	0	0	0	0	0	0
AU023762	0	0	0	0	0	0	0	0	0	0	0	0	0	0	0	0	0	0	0	0	0	0	0	0
AU040320	7.56912	6.70811	5.10954	6.73415	6.40508	1.83891	8.79739	5.3051	7.03356	6.96743	5.14979	5.15082	6.1383	4.12312	7.10596	9.64118	6.11232	5.77735	4.87093	8.86687	6.90467	4.45893	7.97394	18.8423
AU040972	0	0	0	0	0	0	0	0	0	0	0	0	0	0	0	0	0	0	0	0	0	0	0	0
AU041133	2.07684	1.37813	2.0393	1.55255	1.9142	2.4908	3.74181	3.4158	1.87926	0.86634	2.38311	1.63983	2.69433	0	3.1418	0	1.16037	0.25165	2.07824	2.02639	4.27647	2.1072	2.39942	0
AV039307	1.46886	0.592113	1.16485	0	0	0	0.77298	0	0.927269	2.00697	1.30048	0	0	0	0.342547	0	1.11158	0	0.582916	0	0.340587	0	0.492092	0
AV051173	0.64309	0	0	0	0	0	0	0	0	0	0	0	0	0	0.652843	2.78677	0	0	0.683942	0	0	0	0.551132	0
AV320801	0	0	0	0	0	0	0	0	0	0	0	0	0	0	0	0	0	0	0	0	0	0	0	0
AW011738	0.104643	1.52289	0.308226	0.198264	0.366415	0	0.573509	1.85436	0.599863	0.829568	0.480299	0.369627	0.490924	0	0.644577	2.0735	0.185195	0	0.110524	0	0.991788	0	0.735206	1.41351
AW046200	0.205805	1.38582	1.41726	2.12336	0.72436	0	2.22486	0	0.29309	0.811563	0.708407	0.716432	0.49103	0	1.05419	0.160189	1.80982	0.468825	1.30593	5.38608	1.48536	0	1.07944	0
AW112010	10.8228	45.6064	2.79193	0	23.9236	0	7.36535	0	12.5264	10.5274	5.39787	2.76195	27.0342	23.1097	13.4233	6.64619	4.47889	0.520934	6.49168	15.1094	18.8697	33.8117	27.2297	6.00679
AW146154	3.9727	2.17212	2.92416	1.80725	4.41466	8.30832	4.54975	5.02089	5.34483	2.62745	2.84916	1.61303	4.6425	0.449982	6.54559	1.11962	3.00682	2.38876	2.53435	1.17286	5.3754	5.84323	4.87491	3.02044
AW209491	24.1895	20.7101	17.9046	12.1248	20.4171	13.2305	21.0461	6.81122	23.8433	17.2252	17.2155	14.9019	32.7651	26.0985	20.883	17.9233	23.9075	22.6249	19.2546	11.1571	23.7511	33.8394	22.9369	15.4706
AW495222	0	0	0	0	0	0	0	0	0	0	0	0	0	0	0	0	0	0	0	0	0	0	0	0
AW549542	0	0	0	0	0	0	0	0	0	0	0	0	0	0	0	0	0	0	0	0	0	0	0	0
AW549877	13.6902	16.939	43.7489	43.3441	13.6616	42.4442	15.3659	16.7799	14.2926	14.6809	34.6614	29.1412	18.9563	14.1738	26.4644	12.7323	18.7106	10.1925	38.7634	31.4349	23.7643	28.6712	29.8409	6.43017
AW551984	0	0	0	0	0	0	0	0	0	0	0	0	0	0	0	0	0	0	0	0	0	0	0	0
AW554918	4.16788	2.80836	5.0973	4.90037	3.90826	15.675	4.33238	6.27356	3.40343	2.8121	4.25132	3.70917	3.64902	6.05961	5.18269	5.60047	2.28414	2.98053	4.01893	2.69934	5.14086	4.06738	4.57537	5.39217
AW822252	0	0	0	0	0	0	0	0	0	0	0	0	0	0	0	0	0	0	0	0	0	0	0	0
AY074887	3.28436	2.04737	4.87908	6.45812	0.980371	0	2.8275	0	1.52671	4.77364	4.39521	4.54179	0	11.9561	0.556794	0	1.88587	6.01105	4.07032	0	3.47156	3.58832	2.82682	0
AY358078	8.23108	9.7408	7.26773	8.90339	7.24455	0	7.12491	0	5.70887	8.52838	7.50686	5.50613	5.544	0	9.08	0	8.72027	6.72709	6.47342	6.25588	3.30298	5.44983	6.08687	8.41039
AY512915	0	0	0	0	0	0	0	0	0	0	0	0	0	0	0	0	0	0	0	0	0	0	0	0
AY512931	0	0	0	0	0	0	0	0	0	0.240032	0	0	0	0	0	0	0	0	0	0	0	0	0	0
AY761184	0	0	0	0	0	0	0	0	0	0	0	0	0	0	0	0	0	0	0	0	0	0	0	0
AY761185	0	1.75431	0	0	0	0	0	0	0	0	0	0	0	0	0	0	0	0	0	0	0	0	0	0
Aaas	14.7419	17.552	12.7197	13.8842	16.1079	16.8787	22.2615	18.6114	16.1376	18.4482	12.7803	19.6476	16.686	12.4773	22.8415	27.2318	14.586	18.7426	10.7345	18.0973	12.1387	20.7512	20.0848	21.9196
Aacs	13.5272	17.6376	14.413	18.4077	14.946	10.8257	14.053	11.2522	15.0645	15.5338	13.6841	16.0685	12.4928	10.1615	11.3329	10.6814	17.5784	16.8383	14.8484	16.3823	11.4656	13.5219	13.14	18.4478
Aadac	0	0	0	0	0	0	0	0	0	0	0	0	0	0	0	0	0	0	0	0	0	0	0	0
Aadacl2	0	0	0	0	0	0	0	0	0	0	0	0	0	0	0	0	0	0	0	0	0	0	0	0
Aadacl3	0	0	0	0	0	0	0	0	0	0	0	0	0	0	0	0	0	0	0	0	0	0	0	0
Aadat	0	0	0	0	0	0	0	0	0	0	0	0	0	0	0	0	0	0	0	0	0	0	0	0
Aaed1	1.7359	1.32017	1.71245	2.89063	2.46164	0	1.38091	0	0.490122	0.339815	0.796601	0.296152	0.848657	0	1.06386	0	1.2107	0.38944	1.10353	5.95434	1.70704	8.26879	0.904618	0
Aagab	36.7144	38.3911	31.1651	27.222	39.4119	29.2294	35.1238	34.205	36.7542	35.9329	30.5813	25.9537	40.8963	21.4499	29.6277	42.9024	34.2371	38.1834	30.3705	32.2104	36.4542	41.2179	30.6815	47.5262
Aak1	12.2135	9.98378	19.5323	16.4997	15.8461	10.571	16.2328	17.1783	11.1616	10.5874	16.3732	15.4567	13.571	16.555	15.6323	13.3688	9.18034	8.07723	17.2174	17.6166	16.2548	15.0124	15.9647	15.7313
Aamdc	15.9735	16.4766	9.81967	5.99656	14.3066	37.0094	18.4852	0	12.2873	11.7397	10.1088	9.1338	11.937	20.0516	14.5357	14.5424	14.3308	15.7206	14.0431	9.68187	9.0872	9.63002	10.9021	3.7409
Aamp	46.3054	61.0268	42.6119	37.8879	45.9929	21.3978	54.2262	25.2696	49.7038	53.6956	44.2763	47.2964	45.1276	54.2026	47.1421	21.5018	51.9719	65.6805	39.7465	41.6095	37.6844	53.9464	36.6725	40.2254
Aanat	0	0	0	0	0	0	0	0	0	0	0	0	0	0	0	0	0	0	0	0	0	0	0	0
Aar2	18.0056	17.5828	16.8555	16.1635	17.2947	26.765	20.8111	14.2123	18.4411	17.4032	17.3173	14.8653	16.1025	16.4639	18.2418	13.5487	17.1988	18.7104	15.1391	12.9044	17.216	14.3574	15.0753	23.0447
Aard	0	0	0	0	0	0	0	0	0	0	0	0	0	0	0	0	0	0	0	0	0	0	0	0
Aars	23.2426	30.5814	16.6073	16.6515	32.611	24.8348	23.0763	32.8458	28.403	29.2631	18.8164	24.5487	28.0052	30.5332	19.3174	40.2182	29.7401	28.7677	18.2657	21.5387	31.1423	45.3651	20.7708	51.9835
Aars2	11.329	12.9685	9.63623	14.9766	8.6594	18.2514	8.87896	4.73895	10.4767	12.9034	7.1259	13.082	8.33731	8.97312	7.92955	8.94642	11.4505	15.693	7.35473	9.73531	7.6318	12.5682	8.55737	6.29896
Aarsd1	14.2987	18.6703	8.53696	13.3737	11.7737	12.0384	11.359	14.6114	15.6617	16.6139	10.4888	11.7836	14.6116	17.8675	8.63972	5.99036	11.5231	20.4941	8.92775	4.68675	11.0444	15.6529	6.95773	6.44326
Aasdh	7.35049	7.3702	7.95652	13.7508	8.1474	15.6801	8.13097	11.2671	8.92126	8.79886	9.73903	12.4318	9.02211	18.1267	5.9161	4.64906	9.20306	7.52952	9.44087	11.6884	8.8498	12.4794	8.39659	10.9161
Aasdhppt	13.6356	9.75739	16.6111	13.2071	12.1948	12.7065	7.64223	7.37212	10.1306	11.9373	14.5045	11.4344	14.1129	15.515	12.3652	6.07999	8.19343	9.97836	16.0829	11.3481	18.7344	20.2442	11.4535	9.31528
Aass	0	0	0	0	0	0	0	0	0	0	0	0	0	0	0	0	0	0	0	0	0	0	0	0
Aatf	21.2156	18.5577	11.8939	18.7288	18.4842	14.0641	18.6918	15.0617	19.877	23.7414	15.0242	23.7928	20.4251	26.7549	14.1052	19.2302	15.9266	26.1667	15.0672	17.1457	19.619	29.5421	15.822	6.65205
Aatk	0.106409	0.103692	0	0.96269	0	0	0	2.51613	0.07649	0.105725	0	0.0473277	0.0618663	4.82052	0	0	0	0	0	0.141896	0	0	0.0468278	0
Abat	0.372383	0.241729	0.365316	0.113623	0.650577	0	0.0855215	0	0	0.24654	0.712212	0.441185	0.289114	0	0.382643	0	0.264891	0.215438	0.589657	0.606237	0.438392	0	0.382296	0
Abca1	0	3.27982	0	0.0500946	0	0	0	0	0.0755642	0.156611	0	0.0234335	0	0	0.0539547	0	0.233277	0.0609549	0.138404	0.304198	0.0614423	0	0.27748	0
Abca12	0	0	0	0	0	0	0	0	0	0	0	0	0	0	0	0	0	0	0	0	0	0	0	0
Abca13	0	0	0.0491068	0.0957592	0.0145545	0	0.0231629	2.80615	0.0240659	0.0332483	0	0.0746916	0.0193044	0	0.0343535	1.06261	0	0.058266	0	0.35793	0	0.0356229	0	0
Abca14	0	0	0	0	0	0	0	0	0	0	0	0	0	0	0	0	0	0	0	0	0	0	0	0
Abca15	0	0	0	0	0	0	0	0	0	0	0	0	0	0	0	0	0	0	0	0	0	0	0	0
Abca16	0	0	0	0	0	0	0	0	0	0	0	0	0	0	0	0	0	0	0	0	0	0	0	0
Abca17	0	0.051443	0	0	0.0460898	0	0	0	0	0	0	0	0	0	0	0	0	0	0	0	0.12412	0	0	0
Abca2	10.937	14.1797	10.9867	13.4753	9.45203	14.7803	11.8378	20.1557	11.6873	11.8453	9.89424	13.0518	11.1609	9.41978	8.17509	12.3913	12.822	11.099	9.8418	13.7526	9.91103	14.5382	12.7702	17.5234
Abca3	5.02091	7.65266	2.18722	3.81722	3.51124	0	4.96978	9.73027	4.57973	5.39339	2.55774	3.71229	4.00422	7.67004	5.17196	16.2198	4.70554	4.46348	3.62973	10.3975	4.60343	11.2696	6.28262	18.0941
Abca4	0	0	0	0	0	0	0	0	0	0	0	0	0	0	0	0	0	0	0	0	0	0	0	0
Abca5	0.0327242	0.0638893	0.0320848	0.0624466	0.11417	0	0.0452863	0	0.0471095	0.0325481	0	0	0.0758533	0	0.0672928	0	0	0	0.103594	0.233319	0.0767154	0.139706	0.0865048	0
Abca6	0	0	0	0	0	0	0	0	0	0	0	0	0	0	0	0	0	0	0	0	0	0	0	0
Abca7	5.48226	7.63969	4.64845	6.44457	3.70471	0.502514	5.35575	9.11271	4.92259	6.6388	5.53425	5.18012	4.87968	5.22715	5.04252	7.13888	5.67594	5.49784	4.61111	6.71566	3.82176	6.24956	6.31738	8.95622
Abca8a	0	0	0	0	0	0	0	0	0	0	0	0	0	0	0	0	0	0	0	0	0	0	0	0
Abca8b	0	0	0	0	0	0	0	0	0	0	0	0	0	0	0	0	0	0	0	0	0	0	0	0
Abca9	0	0	0	0	0	0	0	0	0	0	0	0.0387339	0	0	0	0	0	0	0	0	0	0	0	0
Abcb10	3.61384	6.40814	4.62172	4.78751	4.22829	0	4.35669	7.17509	2.50333	4.22933	2.88804	4.64299	4.43596	11.2255	4.24366	16.4873	5.89642	3.43402	4.97309	4.23917	4.48395	2.62104	4.88306	14.5092
Abcb11	0	0	0	0	0	0	0.0775938	0	0	0	0	0	0	0	0	0	0	0	0	0	0.0661675	0	0.049514	0
Abcb1a	0.331742	1.88543	0.162702	0	0.579362	0	0.68648	0.929258	1.51018	0.384504	0.444128	0.196711	2.18686	1.50265	0.68186	0	0.49076	0	0.116721	0.049138	1.10543	0.118143	1.11937	0.984385
Abcb1b	7.83634	5.76862	8.00038	9.51431	11.6321	14.354	8.51547	22.6571	8.42154	6.70623	10.6007	7.81036	11.1326	6.00292	7.5937	13.4306	6.66933	6.11772	9.01219	8.31453	11.1781	8.3073	10.0904	9.79504
Abcb4	0	0.0662951	0	0.129531	0.0595202	0	0.0938051	1.92808	0	0.338143	0	0.665212	0.23823	6.2951	0	9.29383	0	0	0.0719127	0.362651	0.0802643	0	0	0
Abcb5	0	0	0	0	0	0	0	0	0	0	0	0	0	0	0	0	0	0	0	0	0	0	0	0
Abcb6	5.70921	7.04603	5.69964	3.9449	6.60465	1.17669	6.50374	7.77642	6.79856	6.61913	5.66291	7.10057	6.68732	15.2591	4.1731	20.1233	6.68222	8.58879	5.72288	4.62005	4.6948	4.35022	4.1657	5.63769
Abcb7	16.5763	8.59125	26.9084	17.154	19.4583	24.3821	13.8142	14.9784	15.4828	15.433	23.3946	15.5661	21.2511	25.2849	20.1226	19.0738	8.88286	10.7099	20.7628	18.5594	30.1045	20.1457	24.4528	8.74069
Abcb8	23.3833	22.8899	18.7813	14.2911	25.1116	21.2965	22.0013	14.3203	24.3839	25.1928	19.5141	20.246	23.9934	26.2704	18.1563	13.1918	23.7816	29.2934	19.0824	20.5894	23.8966	21.0987	16.4688	31.5659
Abcb9	35.5272	39.8715	30.6343	37.0956	51.2635	21.87	34.0528	37.0605	32.0438	37.8432	33.5844	38.7314	38.7611	24.6817	33.1004	35.4614	38.9713	47.842	32.155	32.5077	35.9697	36.7399	40.2272	40.0313
Abcc1	9.4865	9.65412	8.94227	11.014	10.0885	11.0152	5.53416	8.18688	9.80341	9.42899	8.87794	10.2538	9.94904	8.84349	5.63293	12.2848	9.03856	7.47344	9.57467	15.9388	9.24857	7.37696	6.08294	9.66004
Abcc10	6.31467	7.16067	3.78847	6.70364	5.31637	18.5952	6.42361	12.7047	6.62644	5.86776	3.32392	6.42991	4.93967	7.20346	5.02907	6.44823	7.25875	5.3265	4.73616	6.91397	5.8509	4.61202	6.95581	8.26603
Abcc12	0	0	0	0	0	0	0	0	0	0	0	0	0	0	0	0	0	0	0	0	0	0	0	0
Abcc2	0	0	0	0.145353	0	0	0	0.267372	0	0	0	0	0	0	0	0	0	0	0	0	0	0	0	0
Abcc3	0	0.214231	0	0	0.0479988	0	0	2.59848	0	0.436886	0	0	0	0	0	0	0.0487917	0.0636565	0	0	0	0	0	0
Abcc4	8.86261	8.52136	14.3107	12.4261	9.30331	5.00583	12.8547	12.4062	9.13626	10.6912	14.801	11.627	10.127	9.02084	11.1565	10.045	10.8787	12.8078	13.0364	12.6208	8.69958	9.51876	13.634	8.06302
Abcc5	10.6284	7.8085	6.89088	5.82633	7.70042	12.0421	7.69101	10.2012	11.7961	8.70979	7.59855	6.9744	9.00518	2.72957	6.57285	6.17325	8.56765	5.24757	7.57915	10.2892	10.381	15.6626	9.722	12.1321
Abcc6	0	0.0540492	0	0	0	0	0.0765293	0	0	0	0	0	0	0	0.0570119	0	0	0	0	0	0	0	0	0
Abcc8	0.0554525	0.0540266	0	0	0	0	0	0	0	0	0.0636329	0	0	0	0	0	0	0	0	0	0	0	0	0
Abcc9	0	0	0	0	0	0	0	0	0	0	0	0	0	0	0	0.0295237	0	0	0	0	0	0	0	0
Abcd1	23.866	23.8425	19.1935	20.4552	23.5503	12.0999	31.7738	23.3153	24.1412	28.0336	21.2052	19.8208	21.6925	24.4796	30.641	44.2466	24.5985	26.4046	20.4752	32.5139	21.0396	34.0397	35.114	59.2738
Abcd2	0	0.193558	0.77901	0.803851	0.0433355	0	0	2.50518	0.0713884	0.0493319	0.0569655	0.220951	0.0576947	0	0	0	0.0881557	0.0575214	0.10479	0.485641	0.408336	0	0.0437079	0
Abcd3	11.0662	9.95406	10.0501	8.38946	14.0093	14.1939	8.73936	6.2194	10.9035	9.91345	7.77069	6.36506	11.2911	3.74166	7.71884	5.65179	10.4644	9.72507	11.2489	6.29052	14.6278	11.4842	8.8574	2.58338
Abcd4	3.29504	3.74523	2.90101	6.12993	2.58725	0	3.42073	0	2.76663	3.37626	3.65056	4.20862	4.27078	9.47492	2.56576	5.12492	4.01949	4.05261	2.7605	6.81699	2.69584	4.3816	3.19185	4.12625
Abce1	94.1165	66.9047	120.954	78.9981	107.928	87.7105	88.6953	89.0731	95.8115	87.2361	118	80.8931	111.435	90.2531	127.536	69.0097	80.0034	78.2979	110.114	75.8583	118.842	93.194	102.165	54.5345
Abcf1	64.3765	80.0225	51.9394	57.0002	60.3061	63.714	66.016	62.3052	67.1728	85.0654	61.234	76.5462	54.4698	63.9369	51.8596	57.8539	78.4316	88.6236	57.3917	61.724	47.2036	50.011	45.7179	68.4516
Abcf2	81.054	69.4863	60.71	59.5857	70.9801	41.6044	85.2384	88.1216	71.1059	84.0565	59.2673	60.6532	66.8215	76.8101	74.9374	131.596	67.6381	93.0193	57.1569	61.8605	65.7659	52.6881	63.8976	60.4531
Abcf3	10.1864	12.9769	7.89733	9.34324	8.98342	4.81665	10.5835	6.35405	11.9137	13.925	7.36692	9.55086	7.30581	9.92878	7.12111	13.5482	10.7688	11.46	8.135	4.47154	8.49457	6.22736	8.72818	17.843
Abcg1	12.4453	15.9487	8.59937	7.63547	10.904	18.17	5.59921	2.57824	11.2553	12.8377	7.84391	7.26246	10.7341	15.2021	5.76616	6.0789	14.1919	11.9113	10.4483	10.7781	12.2378	11.3783	7.72103	8.35452
Abcg2	0.808888	0.44804	0.567402	1.09352	0	0	0.158092	0	0.330984	0.686675	0.397787	1.83387	0.543107	1.04743	0	7.2213	0.613111	0.398777	0	0	0.137125	0	0	0
Abcg3	0.093421	0.18145	0	0	0.326936	0	1.0256	0	0.133978	0.277887	0	0.0826318	0.328096	0	0.383726	4.74857	0.082725	0	0	0	0.773456	0	0.985055	8.36303
Abcg4	0.154609	0.0751767	0.07586	0.29373	0.743363	0	0.850562	0	0.221953	0.536988	0.266121	1.16513	0.631795	14.2893	0.476453	12.1921	0.342611	0.357204	0.0816204	0.274058	0.456065	0	0.339885	2.82365
Abcg5	0	0	0	0	0	0	0	0	0	0	0	0	0	0	0	0	0	0	0	0	0	0	0	0
Abcg8	0	0	0	0	0	0	0	0	0	0	0	0	0	0	0	0	0.0828614	0	0	0	0	0	0	0
Abhd1	0.0995782	2.55006	0.515804	0.68315	0.481114	0	1.4747	0	2.25033	1.76295	0.715427	1.71917	1.46153	0	1.5219	0	2.22137	1.42949	0	1.37446	0.601742	0	1.22939	0
Abhd10	8.43745	10.6084	10.6869	6.85094	8.21135	18.0974	11.8266	11.6113	9.22111	9.21788	7.14814	7.42795	14.086	0.519411	12.8301	3.95177	9.1606	9.06852	12.8118	23.4243	11.4538	12.7261	9.69367	4.96034
Abhd11	22.5602	29.6198	14.8109	20.732	27.9484	45.1731	18.2634	30.8345	18.9437	24.4587	21.3542	23.8558	26.1016	51.563	12.995	19.2038	27.0931	28.2556	21.1381	16.0179	17.5537	40.6748	13.1124	34.9467
Abhd11os	0	0.832155	0	0	2.50699	0	0	0	1.25036	0	0	0.724294	1.23725	0	0	0	0	0	0	0	0	0	1.55246	0
Abhd12	21.1588	24.0755	15.9264	22.5021	23.3051	11.6047	21.8633	29.8239	21.2304	21.2154	19.457	24.3546	14.0101	16.0557	17.6998	37.9863	21.1867	28.5464	18.0791	23.0663	16.6467	22.5414	19.2012	38.7019
Abhd12b	0	0	0	0	0	0	0	0	0	0	0	0	0	0	0	0	0	0	0	0	0	0	0	0
Abhd13	15.0948	14.6017	25.8158	21.8404	18.8428	19.2541	15.7889	15.7435	16.685	14.5128	22.762	21.6683	18.5082	21.3263	20.8895	12.9455	15.284	12.8727	22.9502	16.6132	16.7892	23.7531	20.0031	17.2376
Abhd14a	27.0567	33.8753	22.821	21.0066	26.0937	23.5544	26.2241	13.7885	30.0353	30.1068	23.5721	24.3979	22.07	33.6431	22.2756	14.9116	36.5543	35.5061	28.8106	17.7488	25.7472	23.7562	27.8077	10.812
Abhd14b	2.0955	5.23936	1.03082	0	0.737683	38.3432	6.50957	1.28967	2.38684	4.54396	0.480865	0.911349	0	0	6.22508	5.70484	6.44817	3.10156	0.886509	0	0.252209	0	7.32599	5.5683
Abhd15	0.610649	4.40766	0.941842	0.993413	0.534089	0	0.359443	0	0.500622	0.605665	0.400408	0.849533	0.306058	0	0	2.15021	0.695497	0.704638	1.566	1.38998	0.309249	0	1.2268	1.09075
Abhd16a	5.9026	9.79947	7.28799	6.42231	7.03864	20.1942	9.89017	20.2057	6.27182	7.63068	5.55718	6.23928	6.26156	8.23398	7.91657	7.13722	6.00936	9.19105	5.11843	12.4941	6.50037	3.8976	8.4886	9.67837
Abhd16b	0	0	0	0	0	0	0	0	0	0	0	0	0.201184	0	0	0	0	0	0	0	0	0	0	0
Abhd17a	92.9043	122.011	79.0239	88.2849	82.6866	75.7952	101.967	70.5558	78.5286	110.794	95.5273	114.918	66.8426	81.0514	66.3815	48.2834	114.683	123.442	86.2815	92.3446	63.3561	111.007	85.9646	90.8757
Abhd17b	14.7401	8.05009	23.6668	15.4964	14.0387	16.8771	12.1612	14.6055	10.8891	12.5121	16.6452	12.5807	13.4739	2.75703	18.1304	8.78898	11.6887	8.61111	17.1775	15.2697	25.8263	11.5306	14.6835	16.1352
Abhd17c	78.3064	54.4185	95.6722	78.6854	74.0257	72.4164	47.4749	44.9245	77.9977	81.2461	97.8028	89.015	76.3814	104.528	61.0321	55.0708	58.3246	72.8125	90.7463	85.9794	80.6958	61.1026	55.3868	34.0893
Abhd2	16.78	19.3375	17.1475	20.3716	15.543	7.45739	21.3971	25.4958	17.1639	14.2019	18.6917	20.73	15.4055	11.2054	15.8187	25.9303	15.3757	13.2323	18.1361	22.4673	14.8663	17.647	26.0342	21.4344
Abhd3	0	0	0	0	0	0	0	0	0	0	0	0	0	0	0	0	0	0	0.166531	0	0	0	0	0
Abhd4	2.04995	6.53808	2.01186	2.39342	2.42681	0	10.212	15.913	1.89767	2.26689	2.62704	2.44014	1.9838	3.27681	7.79091	18.1896	5.43132	3.1912	2.79933	2.01828	1.86023	3.35701	9.0933	59.1983
Abhd5	9.00843	7.96337	7.07383	7.34987	11.0322	0	15.8308	19.7644	8.6577	6.7002	7.64943	4.94259	11.0671	13.7147	13.4142	11.5259	5.90423	6.54678	9.7032	10.7615	10.9689	11.3747	14.2503	10.6018
Abhd6	2.33871	3.67426	1.8672	1.24114	3.59033	0	1.79222	2.87649	1.25362	2.74625	3.01896	0.256607	2.07155	0	0.599725	3.90966	4.51545	3.01638	2.62594	2.05519	3.48502	12.8581	2.17814	0
Abhd8	118.926	133.698	85.194	94.4347	133.014	82.5882	129.237	135.786	119.634	115.073	99.9901	97.2742	109.494	133.132	99.4806	92.6852	133.521	102.437	93.67	116.529	98.5927	91.8956	113.254	154.725
Abi1	42.7584	28.2327	68.0188	49.2015	36.5552	63.7474	29.5839	22.6658	41.2796	44.4919	56.0022	41.4336	50.1212	32.2759	41.2362	25.1085	28.6838	30.0456	59.3502	58.1137	61.1588	51.8245	37.2046	24.0354
Abi2	12.7496	6.81798	13.2039	13.3706	10.0491	6.74917	2.69368	2.05506	10.9475	11.442	13.5387	9.57367	11.1648	10.7423	5.47661	3.23847	7.35082	8.65645	15.7157	12.9499	13.4125	14.8864	4.85925	2.19488
Abi3	4.23277	5.31465	0.585615	0	3.45765	0.694728	8.07251	12.4561	4.68983	3.46049	0.791903	0.268282	3.90887	6.77037	8.26798	4.92256	1.98691	1.73684	0.468358	0.918371	2.05686	4.39482	8.35732	14.6168
Abi3bp	0	0.0696929	0	0	0	0	0	0	0	0	0.0821981	0	0	0	0.0735899	0	0	0	0.0756254	0	0.0844484	0	0	0
Abl1	39.7985	45.4246	35.6356	43.4242	40.34	57.6833	46.4886	51.7475	37.4204	42.591	35.7204	38.5767	33.9352	28.971	46.4035	52.9912	41.8349	39.7523	33.7324	40.7649	31.6036	36.3391	42.1554	45.043
Abl2	9.08936	7.31453	10.6212	9.07022	10.5554	10.928	12.1908	11.8618	9.50077	8.47377	10.8654	10.7146	11.7835	13.1893	10.5445	9.12305	8.79084	6.87605	10.222	8.26802	11.0398	11.8001	12.8687	12.0483
Ablim1	114.486	85.6269	77.5573	70.1567	135.598	94.9929	127.322	111.776	126.682	95.3168	84.3313	68.6212	146.934	112.289	161.783	109.262	89.0239	82.9362	93.0247	82.3287	128.001	79.7664	148.755	105.968
Ablim2	0.48906	0.792404	0.15996	0	1.85312	0	3.02525	0.852744	0.116955	0.404336	0.0935027	0	2.00001	1.1818	1.88262	0	0.28891	0.564698	0.602468	0	2.1173	6.97545	2.18372	0.510046
Ablim3	0	0.128122	0	0	0	0	0	0	0	0	0	0	0	0	0	0	0	0	0	0.642561	0	0	0	0
Abo	0	0	0	0	0	0	0	0	0	0	0	0	0	0	0	0	0	0.208556	0	0	0	0	0	0
Abr	11.9189	18.0748	12.9115	9.09573	12.5268	23.5343	23.958	25.5364	12.7562	9.61836	14.7471	11.3638	12.2911	10.0116	20.0304	18.5949	15.2025	9.26654	14.1556	12.8437	11.9855	8.62523	21.7428	22.6016
Abra	0	0	0.168101	0	0	0	0	0	0	0	0	0	0.202787	0	0	0	0	0	0	0	0	0	0	0
Abracl	133.125	110.897	183.766	92.7316	139.129	89.6368	130.692	84.8217	121.436	130.963	194.456	97.4746	145.07	174.301	178.224	85.4958	136.533	106.414	172.294	100.058	190.487	158.266	140.443	51.6249
Abt1	12.1064	12.578	9.36668	6.2928	9.0489	10.6404	8.68642	4.05965	12.195	12.3327	9.66727	10.8122	9.0123	8.25432	8.40007	20.585	13.6753	15.5967	9.28842	5.98438	7.42036	8.67006	10.5431	8.68231
Abtb1	9.95007	17.3899	5.58827	14.7346	8.73386	2.87278	8.59286	16.0021	9.02369	9.20886	7.24885	11.9023	8.78415	20.0503	7.93615	14.7543	12.9548	10.3076	9.01415	19.5412	9.61928	18.6472	8.02527	16.5984
Abtb2	9.59749	7.03945	4.88632	7.16671	9.44407	9.52578	10.5506	11.7942	10.2132	9.83375	6.76131	6.91007	6.57758	10.1258	10.4239	16.0638	4.85082	9.20912	7.88691	6.68952	6.00571	2.59654	7.8579	3.94075
Acaa1a	10.9012	16.9271	12.8937	10.2603	15.7085	7.48308	13.6459	8.43673	12.3984	13.4578	15.2442	13.8562	16.1586	20.3903	10.6522	15.8768	12.6096	16.1651	12.964	31.9368	14.2655	34.0239	10.4397	30.1269
Acaa1b	0.542018	1.21917	0	0	0	0	0.489965	0	0.773103	0.713371	0.207304	0.157803	0.21462	0	0.370376	0	0.159127	0.206352	0	0	0	0	0.316239	0
Acaa2	32.7253	40.1415	32.9983	30.89	41.7506	29.3901	28.1966	59.4183	31.752	38.3136	36.1403	30.4438	40.495	43.4188	22.6304	26.9107	37.2348	41.2404	30.9319	18.5593	28.78	18.4797	23.2448	60.041
Acaca	9.97128	9.18229	9.74666	10.7989	9.89347	15.9312	9.25815	15.1441	10.1876	12.1761	9.07862	9.03528	8.4385	8.76057	10.2529	20.1252	12.421	8.07784	9.29297	7.37278	7.66035	6.43558	10.0239	13.0285
Acacb	0.381884	0.434952	0.249611	0.0607336	0.33307	0	0.220228	0	0.183263	0.221577	0.255633	0.255626	0.14751	0	0.425375	0	0.480896	0.258635	0.436548	0	0.186486	0.950994	0.504767	0.23418
Acad10	2.93672	2.02918	2.42681	2.6428	2.36455	0	2.55095	1.94164	1.88605	1.99395	2.03966	1.91849	2.07528	0	3.25481	0	2.39758	2.41043	3.10067	2.05484	2.55321	3.47124	2.99012	5.72632
Acad11	3.44393	3.10231	3.1327	4.54506	3.59929	0	4.03969	5.97317	3.7366	2.99975	2.60246	1.56239	4.22177	5.32811	3.01954	2.80673	4.5399	3.49062	3.9913	0.967009	4.0676	4.13349	3.17513	2.80216
Acad12	0.609982	1.41827	0.479283	0.922988	1.71023	0	0.833779	0.126829	0.349293	1.20785	0.279971	0.10746	1.00449	0	0.500798	0.385567	0.970541	0.140235	0.77329	0	0.144908	0	0.535279	0
Acad8	9.16711	10.2519	12.3257	14.9218	10.5518	26.956	9.83667	24.5317	10.7133	9.3828	10.6334	9.77411	9.10801	9.21114	9.30992	16.7583	9.34922	11.2525	12.5231	7.13351	9.79081	5.76014	7.35248	19.3766
Acad9	10.1205	9.15356	12.4478	9.82259	11.5228	8.13448	9.41802	23.0759	7.98361	9.40942	10.8773	9.9293	10.4743	9.55716	9.2258	14.6061	7.83655	9.88636	12.6411	14.2865	10.8384	9.14399	8.96455	5.13712
Acadl	15.0351	13.0614	11.6413	12.8882	12.7934	5.29606	8.8898	6.44355	18.6626	14.7129	15.6833	10.2562	14.3626	30.0199	14.4856	5.49018	10.3177	16.5303	9.95115	11.336	15.0397	17.5999	12.5102	13.7832
Acadm	15.1022	16.9479	18.1985	17.7496	18.4942	21.611	16.3127	17.275	16.296	16.4866	16.5114	16.3915	18.1613	26.0933	14.3229	5.27137	15.7224	14.0529	12.9477	18.0373	18.1634	14.059	14.6142	10.8895
Acads	25.134	30.2647	19.544	26.3807	24.1577	47.4989	29.8544	40.4511	24.9923	30.1821	26.8315	23.1359	19.3928	19.3295	23.4901	32.9615	30.4435	30.0491	23.707	30.7053	22.8007	20.4901	22.4364	41.4599
Acadsb	1.85325	3.7661	3.38971	2.07907	2.57831	9.99316	2.08343	0	1.57142	2.00554	2.51325	2.53673	2.75704	15.7248	2.59558	2.01046	2.53764	2.13921	2.04584	1.19354	3.08442	5.9477	3.03609	0.52689
Acadvl	6.11309	7.97486	4.69984	7.15598	6.05806	3.42833	7.61791	2.34472	4.75292	8.94204	5.64206	8.41495	7.04707	0.240956	6.40852	13.2043	8.09999	10.0702	5.61653	3.86015	8.37979	5.12922	4.31271	4.94885
Acan	0	0.613858	0	0.0352917	0.0322824	0	0	0	0	0.0367967	0	0	0	0	0	0	0.822054	0	0	0	0	0	0.0325996	0
Acap1	14.3477	30.8427	10.6812	15.9861	21.5867	13.0036	16.7793	19.1447	17.8964	20.6271	12.7459	19.9946	21.4814	17.4101	14.7263	9.7933	27.9328	18.5006	12.1005	19.5961	18.6739	18.0976	17.2662	19.8027
Acap2	8.65842	8.24047	8.69689	8.49404	9.82956	22.0326	13.7675	11.503	6.83339	6.3931	9.64643	8.278	10.2943	9.44182	18.1471	16.6794	8.02762	5.41056	9.66995	14.2181	12.8764	9.42453	15.7705	15.4394
Acap3	11.6965	13.5145	8.19646	11.8586	9.65673	8.21784	13.2823	13.2804	13.1116	14.9971	8.11214	12.4449	9.20929	9.43244	13.471	6.92723	13.3407	15.2411	8.75177	13.5783	8.3251	8.9296	14.5324	8.46834
Acat1	20.7199	22.3314	30.5847	28.553	21.1872	33.2925	22.8467	10.3977	17.864	20.5546	27.0355	26.7899	24.8023	29.3744	18.9642	19.1445	22.8745	24.6903	24.7014	25.3048	20.3263	28.2424	17.4801	18.8145
Acat2	24.7862	22.1918	22.1269	31.2827	27.8253	65.0987	27.6102	27.892	23.2889	28.4379	25.8403	21.0245	18.5534	30.0488	28.9136	34.9038	26.0095	31.6796	24.0964	15.3178	26.997	20.9637	23.097	18.7275
Acat3	0	0	0.587551	0.710876	0	0	0.471695	0	0	0.96334	0.330988	1.60134	0.831638	0	0.916839	0	0	0.6772	0.633756	0	1.1084	8.52084	1.15089	7.80406
Acbd3	18.6626	17.1175	20.3856	21.1882	19.2974	39.249	17.2884	13.8372	17.3521	16.8254	19.6461	16.3211	15.4519	32.3511	17.6688	15.3719	15.4598	16.1153	20.9049	15.3107	16.8599	17.3583	17.0499	12.6096
Acbd4	7.64422	9.03634	6.11988	6.14635	6.82843	0	9.26291	9.3903	7.6914	7.70077	5.52265	8.33079	4.84463	0.770071	6.38954	9.69665	7.74873	10.0672	6.13306	4.23196	4.04734	8.50242	7.44669	1.31609
Acbd5	7.49719	6.9106	10.9601	10.9789	6.69057	11.6427	7.19386	11.1165	7.88562	8.06823	10.2167	7.6143	9.48442	24.1459	10.5097	4.47688	5.39758	5.95106	9.97789	10.4498	15.6643	13.3632	9.95648	3.66597
Acbd6	68.3368	71.2745	37.7074	67.7342	45.4685	24.8449	59.9627	35.0439	59.2631	56.7189	46.6473	78.1821	36.3405	45.0966	33.8886	32.2358	74.1541	59.7111	42.9916	72.3758	36.0522	63.8938	45.9126	85.836
Acbd7	0	0	0	0	0	0	0	0	0	0.781803	0	0	0	0	0	0	0	0	0	7.96477	0	0	0.69543	0
Accs	5.50582	4.1766	3.66569	4.09289	4.00955	11.6015	5.03045	9.24631	3.54817	3.14292	4.68579	2.44308	4.0206	0	4.35114	9.28855	5.17986	3.91688	5.36557	5.98652	3.81714	3.30146	3.65633	12.8316
Accsl	0	0	0.128483	0	0.114648	0	0	0	0.187137	0	0	0	0	0	0	0	0	0	0	0	0	0	0	0
Acd	23.4286	23.9754	10.6729	22.1539	17.7619	1.96763	16.0985	14.4473	22.228	24.1524	10.4538	16.3987	14.5195	38.9705	13.7754	15.1664	19.0636	26.1594	11.2433	10.0162	10.7168	15.8754	12.5094	24.5813
Ace	0	0.842651	0	0	0.0980587	0	0	0	0	2.04062	0	0	0.440315	1.42447	0	0	0.400225	0.312989	0.0592563	0	0	0	0	1.1304
Ace2	0	0	0	0	0	0	0	0	0	0	0	0	0	0	0	0	0	0	0	0	0	0	0	0
Ace3	0	0	0	0	0	0	0	0	0	0	0	0	0	0	0	0	0	0	0	0	0	0	0	0
Acer1	0	0	0	0	0	0	0	0	0	0	0	0	0	0	0	0	0	0	0	0	0	0	0	0
Acer2	4.97112	5.3371	3.0316	3.59495	5.20076	12.3286	1.51242	0.575651	4.37867	4.04889	5.04894	2.93584	8.1384	5.84648	2.71481	2.51927	5.57224	4.32844	4.28963	2.99916	6.34208	1.76125	8.71589	0.717379
Acer3	3.2298	2.60819	3.57346	2.93998	3.24254	0	2.271	0.360168	2.0728	2.11491	4.02165	2.07407	2.80415	1.49428	2.9653	0	2.07212	2.78105	3.1921	4.57279	4.53486	3.23237	2.96212	0.646328
Ache	0.264791	0.2563	0	0	0.232123	0	0.180711	0	0.18941	0	0	0.232889	0.156002	0	0	3.02796	0.467819	0	0.139886	0.582716	0	0	0	0
Acin1	163.97	193.775	129.936	192.115	117.803	159.893	140.321	160.255	159.903	171.34	138.944	173.341	117.596	152.767	142.956	196.568	197.933	192.168	131.857	192.243	111.89	154.818	134.571	198.019
Ackr2	0	0	0	0	0	0	0.135082	0	0	0.0976393	0	0	0.115409	0	0.404635	0	0	0	0	0	0.116598	0	0.086524	0
Ackr3	0	0	0	0	0	0	0	0	0.207673	0.143661	0	0.255079	0	0	0	0	0	0	0	0	0.173163	0	0	0
Ackr4	0	0	0	0	0	0	0	0	0	0	0.32041	0	0.164713	0	0.143232	0	0.123281	0	0.147533	0	0.166279	0	0.122421	0
Acly	37.6818	32.1569	50.9149	37.8204	41.8742	51.1406	33.9834	44.3531	35.433	40.1072	46.2722	41.8621	40.9595	44.6826	41.5633	43.3574	30.5843	37.7031	45.8212	34.7975	45.6997	44.2392	35.7588	64.6179
Acmsd	0	0	0	0	0	0	0	3.67237	0	0.124961	0	0.222263	0	0	0	4.88382	0	0	0	0	0	0	0	0
Acn9	25.9442	20.9123	21.1188	10.4663	16.3872	2.31611	7.87863	11.121	24.8572	27.8546	19.8327	17.6906	24.9156	0	7.95809	0	24.0338	18.5306	33.5003	20.4936	27.9222	29.5216	13.3907	0
Acnat1	0	0.106719	0	0	0.0478196	0	0	0	0	0	0	0	0	0	0	0	0.0486107	0.063421	0	0	0	0	0	0
Acnat2	0	0	0	0	0	0	0	0	0	0	0	0	0	0	0	0	0	0	0	0	0	0	0	0
Aco1	6.67725	9.00098	8.81839	10.1373	6.95506	3.714	12.1195	4.91643	5.62699	6.12053	8.76735	7.98444	6.20831	8.14359	10.0275	12.8159	9.73955	8.61593	9.48883	6.09865	5.44382	7.41122	8.13478	21.4191
Aco2	108.783	109.556	82.5304	86.4784	116.772	86.2529	99.813	104.939	108.669	114.648	87.0001	95.8129	91.6786	104.381	97.5121	113.853	100.921	136.226	86.7151	78.542	84.6783	81.6189	96.7563	117.988
Acot1	0.196782	0.947195	1.93555	0.923666	0.692285	0	0.532484	0	0.841195	0.194085	1.12893	1.37182	0.468787	0	0	0	0.86572	1.12178	1.8728	0.34371	0	0.42317	1.893	0
Acot10	13.8141	12.524	16.3455	11.085	14.7933	7.26914	12.4543	28.9967	12.5494	11.8455	14.9312	12.3805	14.555	0	17.2304	12.0108	10.3909	10.0396	14.6085	9.7871	13.4746	6.45892	22.2321	18.852
Acot11	0.350708	2.26602	0.203627	0.230662	0.24211	0	0.267459	0	0.278565	0.356183	0.444545	0.187614	0.450158	0	0.24887	1.9262	0.859467	0.392837	0.306661	2.92903	0.398183	1.03442	0.511672	6.48251
Acot12	0	0	0	0	0	0	0	0	0	0	0	0	0	0	0	0	0	0	0	0	0	0	0	0
Acot13	54.7768	43.8608	42.6338	47.1238	61.101	0	49.0085	88.1861	52.1877	46.5506	51.2905	27.7821	57.44	26.4537	43.7675	25.3806	45.7028	76.0179	48.1005	24.3052	37.6433	19.5519	47.6022	60.1244
Acot2	8.53516	8.7771	11.5291	12.598	8.65169	6.27357	13.4685	7.75047	8.01281	8.04962	13.0072	10.555	8.48696	5.07793	6.97837	10.7259	7.42149	8.57408	13.1046	14.0856	7.93389	7.43514	14.2701	6.89713
Acot3	0	0	0	0	0	0	0	0	0	0	0	0	0	0	0	0	0	0	0.117448	0	0	0	0	0
Acot4	0	0.121399	0.369355	0.237003	0.109842	0	0.171255	0	0.179403	0	0.287656	0.772497	0.147521	0	0	0	0	0.144032	1.0594	0	0.297922	0	0.329933	0
Acot5	0.811242	3.12229	3.99015	9.89454	0.178428	0	0	0	0.577759	1.99969	5.58481	7.41626	0.24182	0	0.207783	0	1.9622	1.61754	4.50408	7.25653	0	0	0	0
Acot6	3.61924	3.65249	4.04278	5.26758	4.47798	10.2208	3.80054	2.8885	3.75817	5.36329	3.96401	4.17664	4.28759	3.2821	4.04832	0	3.62593	3.95274	2.43448	11.3951	2.94987	0.353256	4.0343	12.8688
Acot7	59.2261	77.0509	28.1211	43.3553	60.2615	58.6011	52.2337	45.8027	63.2482	66.4348	43.6514	36.7874	52.4983	61.9408	57.6783	79.5581	69.0909	60.8831	40.0185	40.6795	62.5888	29.199	66.5184	56.4999
Acot8	15.7469	15.321	9.14229	15.1849	13.9093	7.20542	15.4213	4.85043	12.7548	19.0545	16.4534	18.4001	13.2518	18.3803	13.8056	17.494	16.2451	18.1073	9.82333	18.4727	9.23816	27.9226	14.6978	3.97886
Acot9	3.92981	3.59409	4.83167	2.76697	6.39404	6.8382	6.38057	11.3092	5.31976	4.65121	4.50901	1.36984	5.61682	19.25	7.24805	0	2.93913	3.36046	3.53225	2.40248	4.72046	0.845073	6.52984	0
Acox1	5.86834	7.00208	6.03203	3.99169	5.98276	6.27292	7.88694	12.0809	4.92576	5.75628	5.95416	6.3414	6.85254	7.72223	6.60322	9.13855	6.00944	5.33785	5.60534	8.98637	6.91651	9.70939	6.3911	7.51843
Acox2	0	0	0	0	0	0	0	0	0	0	0	0	0	0	0	0	0	0	0	0	0	0	0	0
Acox3	9.50594	11.5824	9.05364	8.97194	7.63193	9.43312	13.3815	12.6223	9.40684	7.41081	6.547	8.81098	10.9253	15.3166	13.6045	13.2576	8.93071	8.30486	8.17995	12.6837	7.71723	12.5007	12.6394	28.4055
Acoxl	0.695927	0.2895	1.17123	0.753851	0.522043	3.47526	0.136317	0	0.712624	0.59127	0.912641	0.439298	0.466008	0	0.714538	5.12678	0.352011	0.687396	0.524992	0	0	0.851423	0.349333	0
Acp1	19.5575	17.1322	3.85739	2.68742	3.118	0	29.104	22.5288	20.7109	18.4874	3.46067	2.83007	2.13903	0	36.5076	25.7039	19.5057	17.7085	4.14992	1.16869	2.59341	1.76037	30.9196	16.6532
Acp2	4.50768	6.93136	8.76767	9.51769	6.61931	13.782	5.73743	6.01681	5.9317	5.50028	8.21635	7.40794	5.83083	3.62876	6.49501	13.6052	7.32747	4.2342	8.66471	5.19976	8.2322	9.4298	5.37584	2.75808
Acp5	157.105	94.0888	118.37	141.354	111.26	47.6115	189.413	110.633	135.088	131.634	120.706	131.2	109.888	34.5189	154.941	128.375	81.1797	178.436	105.904	96.9961	105.737	90.8413	182.302	137.136
Acp6	16.2231	17.2996	12.9271	16.5546	15.1494	16.0392	8.34726	6.87206	14.8673	17.034	12.3444	16.281	15.3914	34.0717	9.62909	9.36262	19.1131	19.3301	13.3586	13.166	13.6903	16.8728	10.3169	0.702383
Acpl2	4.0523	4.02801	1.70486	2.56132	2.02621	0	1.45579	8.25757	3.18188	3.06062	1.32853	1.0236	2.48523	0	1.18881	1.30194	2.05007	4.00392	1.6303	1.19431	1.59833	0	1.35624	3.31264
Acpp	0.540281	3.25074	1.11914	1.05867	0.732114	0	0.511248	2.33542	0.444176	0.781907	2.07107	1.38344	0.359971	0	0.999735	0	0.958182	0.643836	1.16408	2.58018	0.509498	0	0.870412	0.323385
Acpt	0	0.236432	0	0	0	0	0	0	0	0	0	0	0	0	0	0	0	0	0	0	0	0	0	0
Acr	0	0	0	0	0	0	0	0	0	0	0	0	0	0	0	0	0	0	0	2.17027	0	0	0	0
Acrbp	5.72957	11.1147	2.93477	2.59332	7.83789	17.9657	5.93952	5.40379	8.58581	8.94026	1.88835	4.77788	7.45581	9.62537	9.56009	1.16953	10.4376	7.46365	2.35291	6.04686	7.07906	24.4969	11.2696	8.94444
Acrv1	0	0	0	0	0	0	0	0	0	0	0	0	0	0	0	0	0	0	0	0	0	0	0	0
Acsbg1	0.102895	0.898603	0.202044	0	0.0900655	0	0.141016	0	0.147476	0.305918	0.236138	0	0.120646	0	0	0	0.0910604	0.118527	0.108675	0.909057	0.121871	0	2.62081	0
Acsbg2	0.219977	0.106664	0.108002	0.208282	0.0963095	0	0	0	0	0.435853	0.126208	0.388207	0.129116	0	0.112905	0	0	0.632996	0.116178	0	0	0	0	0
Acsf2	7.29025	7.43907	7.60902	6.47715	10.1723	5.05073	24.9513	9.05963	7.41178	6.86285	7.94189	7.26574	9.18093	8.86461	22.08	14.2948	9.7249	4.78917	7.21149	5.46966	9.27585	9.48063	24.2462	19.5034
Acsf3	11.5097	13.958	12.9963	15.3733	13.8009	26.3003	9.9318	23.4813	12.1132	14.7932	9.10815	12.1013	11.847	8.87524	8.95885	3.44308	11.6868	14.4307	12.0212	14.79	11.6464	11.914	8.81896	19.1608
Acsl1	3.43861	1.74248	3.72543	4.15335	2.44165	0	2.56369	2.552	2.98345	2.34662	3.12377	4.64029	3.09178	13.7604	1.54552	6.45471	2.60438	2.567	4.08411	3.93928	1.77356	3.06371	2.52041	3.21766
Acsl3	4.70675	4.46435	9.50695	7.21821	6.55013	0	5.75449	8.53003	4.42448	4.69831	9.39018	8.05585	5.1489	3.76042	8.37523	4.43068	6.50453	4.57617	8.73362	5.95312	7.09407	7.06004	8.03179	1.84576
Acsl4	8.18805	6.46724	11.2315	5.47819	10.0446	2.44213	6.47449	1.39404	7.36088	5.93306	9.70532	6.38937	12.8644	13.7877	11.3142	11.6768	5.96963	3.65364	9.74957	10.1282	14.3765	14.4179	9.78447	7.81815
Acsl5	16.4746	24.1807	19.2466	21.9166	27.3335	13.478	24.587	29.4687	19.3941	23.4418	19.9319	24.3268	23.9877	26.7756	18.206	29.2472	19.033	27.0622	17.8699	23.9289	21.9084	19.3529	16.6819	30.5887
Acsl6	0	0	0	0	0	0	0.153024	0	0	0	0	0	0	0	0	1.32844	0	0	0	0.296106	0	0	0	0
Acsm1	0	0	0	0	0	0	0	0	0	0	0	0	0	0	0	0	0	0	0	0	0	0	0	0
Acsm2	0	0	0	0	0	0	0	0	0	0	0	0	0	0	0	0	0	0	0	0	0	0	0	0
Acsm3	0	0	0.0627674	0	0	0	0	0	0	0	0	0	0	0	0	0	0.100886	0	0	0	0	0	0	0
Acsm4	0	0	0	0	0	0	0	0	0	0	0	0	0	0	0	0	0	0	0	0	0	0	0	0
Acsm5	0	0	0	0	0	0	0	0	0	0	0	0	0	0	0	0	0	0	0	0	0	0	0	0
Acss1	29.5053	43.3407	22.4435	25.727	20.2668	35.862	17.9263	10.2128	25.3234	24.476	24.4525	18.4754	22.3307	40.7391	16.7576	25.3019	54.2414	27.7699	28.2684	32.3045	19.3432	15.6942	17.0217	16.8603
Acss2	2.81328	2.14536	1.47962	1.90445	1.49491	12.2157	4.95882	3.03926	2.30447	2.88801	2.07525	1.86437	1.7664	6.37418	3.40424	8.68688	1.15611	1.505	1.06115	1.59829	1.54649	0	4.41284	10.9693
Acss2os	0	0	0	0	0	0	0	0	0	0	0	0	0	0	0	0	0	0	0	0	0	0	0	0
Acss3	0	0	0	0	0	0	0	0	0	0	0	0	0	0	0	0	0	0	0	0	0	0	0	0
Acta1	0	0	0	0	0	0	0	0	0	0	0	0.180975	0.248268	0	0.213103	0	0.182904	0	0	0	0	0	0	0
Acta2	0.111941	0.10854	0	0.105969	0.196058	0	0.153223	0.116556	0	0	0.128448	0.29624	0	0	0	0	0.099011	0.257638	0	0.691511	0.132764	0	0.196555	0
Actb	2957.62	2808.55	2081.31	1623.6	2891.65	2011.44	3337	3837.57	2987.87	2727.69	2621.03	2166.3	2628.17	2496.08	3716.72	5167.17	2713.32	2643.5	2427.63	2742.46	2472.91	2865.49	3570.16	5781.13
Actbl2	0	0	0	0	0	0	0	0	0	0	0	0.18539	0	0	0	0	0	0	0	0	0.124373	0	0	0
Actc1	0	0.430465	0	0	0	0	0	0	0	0	0	0	0	0	0	0	0	0	0	0	0	0	0	0
Actg1	341.569	378.964	239.151	186.359	437.362	330.241	453.947	526.436	386.868	353.725	298.678	239.558	351.885	335.243	477.462	619.043	446.154	322.364	301.7	203.607	302.192	290.518	472.223	840.331
Actg2	0	1.14559	0	0	1.47361	0	1.28524	10.9756	1.01833	0.470131	0.274036	0.206882	0.286532	0	0.244515	0	0	0.271068	0.505409	4.15037	0.866241	0	1.25084	3.88785
Actl10	0.41161	0.989871	0	1.15819	0.72436	0	0.278107	0	0.879271	1.01445	0.472272	0.89554	0.49103	0	1.26503	0	0.180982	0	0.217656	0	0.99024	0	1.61916	1.89415
Actl11	0	0	0	0	0	0	0	0	0	0	0	0	0	0	0	0	0	0	0	0	0	0	0	0
Actl6a	25.6171	19.8363	29.8848	34.1913	23.5281	38.3898	23.4589	10.39	27.1892	23.9937	27.3311	30.097	29.7417	28.7967	20.282	27.6771	21.4154	27.1253	23.5896	31.3179	30.5553	20.2526	19.3001	22.8735
Actl6b	0	0	0	0	0	0	0	0	0	0	0	0	0	0	0	0	0	0	0	0	0	0	0	0
Actl7a	0.205326	0	0	0	0	0	0	0	0	0.202424	0	0.357407	0	0	0	0	0	0	0	0	0	0	0	0
Actl7b	0	0	0	0	0	0	0	0	0	0	0	0	0	0	0	3.23749	0	0.249581	0	0	0	0	0	0
Actl9	0	0	0	0	0	0	0	0	0	0	0	0	0	0	0	0	0	0	0	0	0	0	0	0
Actn1	21.591	14.5338	10.19	10.7898	23.8349	1.81878	13.8764	9.31054	24.8863	17.647	10.3732	11.0657	28.8596	36.2833	21.259	37.5681	13.6439	11.1363	9.62309	16.1616	25.9064	28.2804	25.6898	35.8798
Actn2	0.379712	1.1983	0.46593	0.810139	0.166117	0	0	0	0.272252	0	0.435713	1.0913	0.111157	0	0	0	0.840515	0	1.0025	0	0.112301	0	0.0834062	0
Actn3	0	0.190939	0.0965491	0.0932264	0.172131	0	0.404606	0	0.422998	0.194978	0.112852	0.434635	0.230454	0	0.10098	0	0.0870608	0	0.103866	0	0.116406	0	0.259191	3.68252
Actn4	78.6406	76.6081	59.4762	82.5251	81.9028	68.7452	90.333	82.7594	76.3337	86.6932	66.0837	71.7469	71.5068	95.5356	82.1777	95.8538	70.5558	88.5158	62.814	75.7725	85.1052	78.2926	87.4593	93.2873
Actr10	3.19005	6.14121	5.51145	5.07641	4.66615	16.3593	5.44257	3.48896	5.6775	5.71423	4.69513	4.67821	6.87322	7.16291	3.20619	1.54895	4.61256	6.4145	4.31958	3.75299	6.62009	3.41036	3.59922	1.30437
Actr1a	81.5006	86.2638	68.5444	63.6668	82.3976	94.9802	81.7889	68.5338	83.6012	83.4531	75.9175	75.8441	73.5544	31.4004	87.4211	99.5896	88.9271	93.5068	75.8304	71.9914	64.2856	59.2205	79.6426	92.1709
Actr1b	49.0688	56.4859	37.9304	42.7122	43.5309	52.5538	40.6756	50.5667	46.9083	47.4144	37.4815	43.9703	42.0521	41.7958	43.2285	40.639	54.3086	64.2325	43.1843	45.6323	48.1782	47.0164	41.2853	35.7895
Actr2	173.606	114.543	210.585	152.791	187.925	140.209	152.219	135.399	153.715	139.194	212.992	137.864	201.326	189.873	159.323	160.605	129.282	119.102	215.676	149.137	201.026	180.257	147.554	128.118
Actr3	276.516	209.58	408.541	258.513	377.706	322.058	288.56	297.382	281.957	253.379	404.298	264.067	392.424	337.992	356.251	301.412	230.501	202.844	365.846	271.22	445.912	361.981	280.757	294.376
Actr3b	4.74228	5.25101	3.45376	1.48705	4.16637	1.33008	3.81316	0	3.00721	4.85575	1.81377	3.2239	4.37776	0	1.80049	0	4.33279	4.41572	3.15658	0.768944	2.73408	4.15078	1.5375	4.87256
Actr5	19.0314	27.1834	17.6137	16.7292	16.6747	19.8188	14.0075	15.8536	20.4336	24.3986	17.4982	23.5338	14.3499	11.0588	12.2696	6.55465	22.5381	31.6932	13.7903	26.2367	16.3746	25.3618	13.382	41.8431
Actr6	5.83092	3.74856	8.86015	3.98888	7.14127	30.7741	4.31494	1.09293	4.03343	5.23355	8.92057	5.09577	7.13163	16.3458	7.06391	3.73263	3.89154	2.42276	9.15314	7.42523	11.6386	13.6666	4.63998	0
Actr8	13.3878	12.0176	8.00037	11.0771	11.7395	0	8.6591	14.0268	13.2248	10.5133	5.22615	9.70334	9.11571	18.0188	7.9293	9.56885	8.89722	16.946	8.16694	5.82762	8.70965	13.6167	7.14057	14.9787
Actrt1	0	0	0	0	0	0	0	0	0	0	0	0	0	0	0	0	0	0	0	0	0	0	0	0
Actrt2	0	0	0	0	0	0	0	0	0	0	0	0	0	0	0	0	0	0	0	0	0	0	0	0
[truncated: 21,909 more rows]

## Sheet: Yellow module genes list 
Supplementary File 3. Genes list of the yellow module reported in the figure1A
Gene name
1700009J07Rik
2610034B18Rik
4930506M07Rik
4933417D19Rik
5031414D18Rik
5430435G22Rik
9930111J21Rik1
A530099J19Rik
AI607873
AI836003
Abcg3
Acat3
Acvrl1
Adam23
Adrbk2
Ago4
Aif1
Alox5ap
Amica1
Amz1
Anpep
Apba1
Apobr
Arhgap22
Arhgap32
Arhgap5
Arrdc4
Asah2
Asb2
Avil
Batf3
Bcl2a1a
Bcl3
Bend4
Bmp1
Cabp4
Cadm1
Cap2
Card10
Cbfa2t3
Ccdc88a
Ccr2
Cd180
Cd207
Cd36
Cd40
Cd74
Cd83
Cd86
Cdc42bpb
Cdk14
Cfh
Chsy3
Ciita
Clec9a
Csf2rb
Cst3
Ctnnd1
Ctsh
Cttnbp2nl
Cyp27a1
Cyp8b1
Cysltr1
Dbn1
Dnase1l3
Dscam
Efcc1
Efnb1
Eps8
Esyt3
Fam149a
Fcgrt
Ffar2
Fgd2
Fgfr1
Fgl2
Flt3
Fnbp1l
Fndc5
Fndc7
Fscn1
Fzd1
Fzd2
Gab2
Gapt
Gas2l1
Gatm
Gfra2
Gm2a
Gpr137b
Gpr183
Gpr35
Gpr4
Gpr55
Gpr68
Gpr82
H2-Aa
H2-Ab1
H2-M2
Havcr2
Hck
Hepacam2
Hfe
Hmgn3
Htr7
Icosl
Ifi205
Ifitm3
Ifng
Irf5
Itgad
Itgax
Itpripl2
Kcnk6
Kctd12
Klf4
Lacc1
Lmcd1
Lpcat2
Lrrc25
Lrrc3
Lsp1
Ltbr
Lyn
Map3k9
2018-03-01
Mast4
Mctp1
Mpeg1
Mras
Ms4a4c
Mycl
Naaa
Nav1
Nfam1
Nlrp3
Nrp1
Nuak1
Nuak2
Olfm1
P2rx5
P2ry14
P2ry6
Pak1
Phf11a
Pid1
Pik3r6
Pkib
Plbd1
Plcb4
Plekho1
Pparg
Ppfia4
Prss30
Pvrl1
Rab11fip5
Rab32
Rab39
Rasal2
Rasgrp3
Rassf4
Rbm47
Rd3
Rgag4
Rnase6
Rnf144b
Rps4l
Rtn1
Scn2b
Sdc3
Serpina3g
Serpinb8
Sh3pxd2b
Sh3tc1
Siglecg
Slamf8
Slc11a1
Slc15a3
Slc46a3
Slc8b1
Smim3
Snx22
Soga1
Specc1
Spi1
Srgap3
Sulf2
Sult1a1
Sumo2
Syk
Tbc1d4
Tbc1d8
Tbc1d9
Tcf7l2
Tgfbi
Themis2
Tifa
Tifab
Tlcd2
Tlr11
Tlr13
Tlr3
Tlr9
Traf1
Trf
Trpm2
Tspan18
Tspan33
Tubb6
Tyrobp
Vwf
Wdfy4
Wdr86
Xcr1
Zbtb46
Zc3h12c
Zfp111
Zfp366
Zfp385a
Zfp57
