# Supplementary material for: T-ALL leukemia stem cell 'stemness' is epigenetically controlled by the master regulator SPI1
Source: eLife journal article supplement (doi:10.7554/elife.38314), 2018-11-09
Supplement: supp [file elife-38314-supp-v1.zip › elife_poa_e38314_Supplementary_File_4.xlsx]

## Sheet: Havcr2 high signature genes
Supplementary File 4.The genes list of the HAVCR2high signature genes (1079) reported in the figure4A
Gene ID	Gene name
ENSMUSG00000025964	Adam23
ENSMUSG00000052688	5430435G22Rik
ENSMUSG00000026630	Batf3
ENSMUSG00000026728	Vim
ENSMUSG00000026833	Olfm1
ENSMUSG00000026875	Traf1
ENSMUSG00000026879	Gsn
ENSMUSG00000002111	Sfpi1
ENSMUSG00000060802	B2m
ENSMUSG00000003283	Hck
ENSMUSG00000027639	Samhd1
ENSMUSG00000027907	S100a11
ENSMUSG00000038642	Ctss
ENSMUSG00000038543	BC028528
ENSMUSG00000015745	Plekho1
ENSMUSG00000078238	Gm12854
ENSMUSG00000028657	Ppt1
ENSMUSG00000025743	Sdc3
ENSMUSG00000000682	Cd52
ENSMUSG00000040659	Efhd2
ENSMUSG00000029413	Naaa
ENSMUSG00000029650	Slc46a3
ENSMUSG00000060063	Alox5ap
ENSMUSG00000029771	Irf5
ENSMUSG00000059182	Skap2
ENSMUSG00000034783	Cd207
ENSMUSG00000030055	Rab43
ENSMUSG00000030342	Cd9
ENSMUSG00000030214	Plbd1
ENSMUSG00000044786	Zfp36
ENSMUSG00000030579	Tyrobp
ENSMUSG00000002204	Napsa
ENSMUSG00000030774	Pak1
ENSMUSG00000031097	Tnni2
ENSMUSG00000018819	Lsp1
ENSMUSG00000031838	Ifi30
ENSMUSG00000034330	Plcg2
ENSMUSG00000041515	Irf8
ENSMUSG00000006362	Cbfa2t3
ENSMUSG00000048534	Amica1
ENSMUSG00000032076	Cadm1
ENSMUSG00000032231	Anxa2
ENSMUSG00000074148	Bcl2a1d
ENSMUSG00000074147	Bcl2a1a
ENSMUSG00000032359	Ctsh
ENSMUSG00000063856	Gpx1
ENSMUSG00000060509	Xcr1
ENSMUSG00000069662	Marcks
ENSMUSG00000004207	Psap
ENSMUSG00000036478	Btg1
ENSMUSG00000032740	Ccdc88a
ENSMUSG00000000594	Gm2a
ENSMUSG00000018585	Atox1
ENSMUSG00000018774	Cd68
ENSMUSG00000018920	Cxcl16
ENSMUSG00000048277	Syngr2
ENSMUSG00000020644	Id2
ENSMUSG00000021250	Fos
ENSMUSG00000001270	Ckb
ENSMUSG00000052160	Pld4
ENSMUSG00000006360	Crip1
ENSMUSG00000035493	Tgfbi
ENSMUSG00000051506	Wdfy4
ENSMUSG00000050335	Lgals3
ENSMUSG00000021880	Rnase6
ENSMUSG00000033083	Tbc1d4
ENSMUSG00000071715	Ncf4
ENSMUSG00000022456	2018-09-03
ENSMUSG00000022453	Naga
ENSMUSG00000022540	Rogdi
ENSMUSG00000022901	Cd86
ENSMUSG00000052013	Btla
ENSMUSG00000022659	Gcet2
ENSMUSG00000024013	Fgd2
ENSMUSG00000024300	Myo1f
ENSMUSG00000061232	H2-K1
ENSMUSG00000037649	H2-DMa
ENSMUSG00000037548	H2-DMb2
ENSMUSG00000079547	H2-DMb1
ENSMUSG00000041538	H2-Ob
ENSMUSG00000073421	H2-Ab1
ENSMUSG00000036594	H2-Aa
ENSMUSG00000060586	H2-Eb1
ENSMUSG00000024397	Aif1
ENSMUSG00000073411	H2-D1
ENSMUSG00000060550	H2-Q7
ENSMUSG00000063628	Gm7665
ENSMUSG00000036908	Unc93b1
ENSMUSG00000069833	Ahnak
ENSMUSG00000046805	Mpeg1
ENSMUSG00000024659	Anxa1
ENSMUSG00000041362	4930506M07Rik
ENSMUSG00000059326	Csf2ra
ENSMUSG00000057530	Ece1
ENSMUSG00000022504	Ciita
ENSMUSG00000058715	Fcer1g
ENSMUSG00000030681	Mvp
ENSMUSG00000037321	Tap1
ENSMUSG00000015396	Cd83
ENSMUSG00000042817	Flt3
ENSMUSG00000001128	Cfp
ENSMUSG00000030789	Itgax
ENSMUSG00000073409	H2-Q6
ENSMUSG00000037815	Ctnna1
ENSMUSG00000020120	Plek
ENSMUSG00000040747	Cd53
ENSMUSG00000070348	Ccnd1
ENSMUSG00000046080	Clec9a
ENSMUSG00000036469	2018-03-01
ENSMUSG00000039062	Anpep
ENSMUSG00000048779	P2ry6
ENSMUSG00000025473	Adam8
ENSMUSG00000026536	Mnda
ENSMUSG00000056091	St3gal5
ENSMUSG00000054200	O3far1
ENSMUSG00000071713	Csf2rb
ENSMUSG00000009687	Fxyd5
ENSMUSG00000039899	Fgl2
ENSMUSG00000034708	Grn
ENSMUSG00000024334	H2-Oa
ENSMUSG00000047462	A530099J19Rik
ENSMUSG00000019998	Stx7
ENSMUSG00000019832	Rab32
ENSMUSG00000042249	Adrbk2
ENSMUSG00000030921	Trim30a
ENSMUSG00000003420	Fcgrt
ENSMUSG00000024308	Tapbp
ENSMUSG00000036046	5031439G07Rik
ENSMUSG00000030122	Ptms
ENSMUSG00000043336	Filip1l
ENSMUSG00000038608	Dock10
ENSMUSG00000025279	Dnase1l3
ENSMUSG00000047735	Samd9l
ENSMUSG00000042129	Rassf4
ENSMUSG00000068566	Myadm
ENSMUSG00000028581	Laptm5
ENSMUSG00000024521	Pmaip1
ENSMUSG00000042228	Lyn
ENSMUSG00000021998	Lcp1
ENSMUSG00000044703	Phf11
ENSMUSG00000025017	Pik3ap1
ENSMUSG00000005947	Itgae
ENSMUSG00000022892	App
ENSMUSG00000026407	Cacna1s
ENSMUSG00000015766	Eps8
ENSMUSG00000066456	Hmgn3
ENSMUSG00000020399	Havcr2
ENSMUSG00000053318	Slamf8
ENSMUSG00000024937	Ehbp1l1
ENSMUSG00000026271	Gpr35
ENSMUSG00000056708	Ier5
ENSMUSG00000001763	Tspan33
ENSMUSG00000025232	Hexa
ENSMUSG00000044350	9030625A04Rik
ENSMUSG00000028064	Sema4a
ENSMUSG00000052684	Jun
ENSMUSG00000027199	Gatm
ENSMUSG00000090272	Mndal
ENSMUSG00000021978	Extl3
ENSMUSG00000026458	Ppfia4
ENSMUSG00000053063	Clec12a
ENSMUSG00000050075	Gpr171
ENSMUSG00000009418	Nav1
ENSMUSG00000026628	Atf3
ENSMUSG00000031662	Snx20
ENSMUSG00000020423	Btg2
ENSMUSG00000034675	Dbn1
ENSMUSG00000015133	Lrrk1
ENSMUSG00000018909	Arrb1
ENSMUSG00000006611	Hfe
ENSMUSG00000006519	Cyba
ENSMUSG00000072620	Slfn2
ENSMUSG00000028926	Cdk14
ENSMUSG00000001281	Itgb7
ENSMUSG00000027878	Notch2
ENSMUSG00000038179	Slamf7
ENSMUSG00000032754	Slc24a6
ENSMUSG00000031639	Tlr3
ENSMUSG00000027583	Zbtb46
ENSMUSG00000022636	Alcam
ENSMUSG00000020253	Ppm1m
ENSMUSG00000040829	Zmynd15
ENSMUSG00000038650	Rnh1
ENSMUSG00000071042	Rasgrp3
ENSMUSG00000021596	Mctp1
ENSMUSG00000031799	Tpm4
ENSMUSG00000003134	Tbc1d8
ENSMUSG00000036273	Lrrk2
ENSMUSG00000050721	Plekho2
ENSMUSG00000002944	Cd36
ENSMUSG00000021306	Gpr137b
ENSMUSG00000070354	Evi2b
ENSMUSG00000034792	Gna15
ENSMUSG00000011256	Adam19
ENSMUSG00000026288	Inpp5d
ENSMUSG00000032462	Pik3cb
ENSMUSG00000060591	Ifitm2
ENSMUSG00000044456	Rin3
ENSMUSG00000039452	Snx22
ENSMUSG00000030199	Etv6
ENSMUSG00000019876	Pkib
ENSMUSG00000044811	AF251705
ENSMUSG00000020859	Spag9
ENSMUSG00000007458	M6pr
ENSMUSG00000005142	Man2b1
ENSMUSG00000024190	Dusp1
ENSMUSG00000028228	Cpne3
ENSMUSG00000028673	Fuca1
ENSMUSG00000038301	Snx10
ENSMUSG00000026483	Fam129a
ENSMUSG00000032089	Il10ra
ENSMUSG00000015950	Ncf1
ENSMUSG00000066152	Slc31a2
ENSMUSG00000048120	Entpd1
ENSMUSG00000049625	Tifab
ENSMUSG00000022512	Cldn1
ENSMUSG00000039697	Ncoa7
ENSMUSG00000040950	Mgl2
ENSMUSG00000013698	Pea15a
ENSMUSG00000018008	Cyth4
ENSMUSG00000048621	Gm6377
ENSMUSG00000035212	Leprot
ENSMUSG00000020097	Sgpl1
ENSMUSG00000091649	Gm4902
ENSMUSG00000034445	Cybasc3
ENSMUSG00000029994	Anxa4
ENSMUSG00000029860	Zyx
ENSMUSG00000034361	Cpne2
ENSMUSG00000036499	Eea1
ENSMUSG00000030447	Cyfip1
ENSMUSG00000021423	Ly86
ENSMUSG00000031709	Tbc1d9
ENSMUSG00000003123	Lipe
ENSMUSG00000056069	Fam105a
ENSMUSG00000053158	Fes
ENSMUSG00000028654	Mycl1
ENSMUSG00000042759	Apobr
ENSMUSG00000075010	AW112010
ENSMUSG00000027712	Anxa5
ENSMUSG00000039217	Il18
ENSMUSG00000060131	Atp8b4
ENSMUSG00000026341	Actr3
ENSMUSG00000048163	Selplg
ENSMUSG00000021200	Asb2
ENSMUSG00000016206	H2-M3
ENSMUSG00000021948	Prkcd
ENSMUSG00000023022	Lima1
ENSMUSG00000030468	Siglecg
ENSMUSG00000026170	Cyp27a1
ENSMUSG00000051969	Tlr11
ENSMUSG00000050022	Amz1
ENSMUSG00000091955	Gm3788
ENSMUSG00000054203	Ifi205
ENSMUSG00000022436	Sh3bp1
ENSMUSG00000043131	Mob1a
ENSMUSG00000024789	Jak2
ENSMUSG00000069516	Lyz2
ENSMUSG00000022263	Trio
ENSMUSG00000051344	Plekhm3
ENSMUSG00000024725	Ostf1
ENSMUSG00000032562	Gnai2
ENSMUSG00000028555	Ttc39a
ENSMUSG00000020422	Tns3
ENSMUSG00000019256	Ahr
ENSMUSG00000079523	Tmsb10
ENSMUSG00000016256	Ctsz
ENSMUSG00000026360	Rgs2
ENSMUSG00000056529	Ptafr
ENSMUSG00000022216	Psme1
ENSMUSG00000061577	Gpr114
ENSMUSG00000050732	Vamp8
ENSMUSG00000032092	Mpzl2
ENSMUSG00000055401	Fbxo6
ENSMUSG00000045763	Basp1
ENSMUSG00000004633	Chn2
ENSMUSG00000029322	Plac8
ENSMUSG00000026535	Ifi202b
ENSMUSG00000027009	Itga4
ENSMUSG00000070691	Runx3
ENSMUSG00000026480	Ncf2
ENSMUSG00000044080	S100a1
ENSMUSG00000034868	Myl12b
ENSMUSG00000025225	Nfkb2
ENSMUSG00000027422	Rrbp1
ENSMUSG00000025809	Itgb1
ENSMUSG00000021725	Parp8
ENSMUSG00000028063	Lmna
ENSMUSG00000006304	Arpc2
ENSMUSG00000056515	Rab31
ENSMUSG00000000530	Acvrl1
ENSMUSG00000050232	Cxcr3
ENSMUSG00000021457	Sykb
ENSMUSG00000026358	Rgs1
ENSMUSG00000050347	Gm9844
ENSMUSG00000058099	Nfam1
ENSMUSG00000001025	S100a6
ENSMUSG00000079419	Ms4a6c
ENSMUSG00000086217	Gm9530
ENSMUSG00000029622	Arpc1b
ENSMUSG00000030103	Bhlhe40
ENSMUSG00000032578	Cish
ENSMUSG00000034795	Ccdc122
ENSMUSG00000040268	Plekha1
ENSMUSG00000070304	Scn2b
ENSMUSG00000022500	Litaf
ENSMUSG00000025534	Gusb
ENSMUSG00000028525	Pde4b
ENSMUSG00000001700	Gramd3
ENSMUSG00000052056	Zfp217
ENSMUSG00000045658	Pid1
ENSMUSG00000070780	Rbm47
ENSMUSG00000082433	Gm9025
ENSMUSG00000027611	Procr
ENSMUSG00000003518	Dusp3
ENSMUSG00000035004	Igsf6
ENSMUSG00000027398	Il1b
ENSMUSG00000001473	Tubb6
ENSMUSG00000021025	Nfkbia
ENSMUSG00000029570	Lfng
ENSMUSG00000025283	Sat1
ENSMUSG00000017652	Cd40
ENSMUSG00000018569	Cldn7
ENSMUSG00000078153	Psme2b-ps
ENSMUSG00000046688	Tifa
ENSMUSG00000005125	Ndrg1
ENSMUSG00000046727	0610010O12Rik
ENSMUSG00000021218	Gdi2
ENSMUSG00000037580	Gch1
ENSMUSG00000039208	Metrnl
ENSMUSG00000051212	Gpr183
ENSMUSG00000004665	Cnn2
ENSMUSG00000026223	Itm2c
ENSMUSG00000060090	Rp2h
ENSMUSG00000018500	Adora2b
ENSMUSG00000039191	Rbpj
ENSMUSG00000010358	Ifi35
ENSMUSG00000024132	Eci1
ENSMUSG00000039501	Znfx1
ENSMUSG00000030691	Fchsd2
ENSMUSG00000022799	Arhgap31
ENSMUSG00000070031	Sp140
ENSMUSG00000026357	Rgs18
ENSMUSG00000061689	Dlgap4
ENSMUSG00000015468	Notch4
ENSMUSG00000003545	Fosb
ENSMUSG00000062825	Actg1
ENSMUSG00000003032	Klf4
ENSMUSG00000030643	Rab30
ENSMUSG00000026600	Soat1
ENSMUSG00000034707	Gns
ENSMUSG00000036989	Trim3
ENSMUSG00000013974	1810033B17Rik
ENSMUSG00000041481	Serpina3g
ENSMUSG00000051339	2900026A02Rik
ENSMUSG00000030427	Lilra6
ENSMUSG00000029484	Anxa3
ENSMUSG00000024621	Csf1r
ENSMUSG00000036381	P2ry14
ENSMUSG00000020458	Rtn4
ENSMUSG00000075611	Gm11545
ENSMUSG00000058818	Lilrb3
ENSMUSG00000071714	Csf2rb2
ENSMUSG00000025492	Ifitm3
ENSMUSG00000028337	Coro2a
ENSMUSG00000018340	Anxa6
ENSMUSG00000038976	Ppp1r9b
ENSMUSG00000036528	Ppfibp2
ENSMUSG00000033577	Myo6
ENSMUSG00000045394	Epcam
ENSMUSG00000002885	Cd97
ENSMUSG00000046207	Pik3r6
ENSMUSG00000035901	Dennd5a
ENSMUSG00000020077	Srgn
ENSMUSG00000039315	Clnk
ENSMUSG00000022377	Asap1
ENSMUSG00000029552	Tes
ENSMUSG00000031627	Irf2
ENSMUSG00000040451	Sgms1
ENSMUSG00000034422	Parp14
ENSMUSG00000020635	Fkbp1b
ENSMUSG00000022964	Tmem50b
ENSMUSG00000001247	Lsr
ENSMUSG00000051185	Fam174a
ENSMUSG00000009772	Nuak2
ENSMUSG00000038507	Parp12
ENSMUSG00000025178	Pi4k2a
ENSMUSG00000001175	Calm1
ENSMUSG00000027947	Il6ra
ENSMUSG00000060519	Tor3a
ENSMUSG00000044447	Dock5
ENSMUSG00000037731	BC013712
ENSMUSG00000040751	Lat2
ENSMUSG00000015846	Rxra
ENSMUSG00000002983	Relb
ENSMUSG00000005672	Kit
ENSMUSG00000045326	Fndc7
ENSMUSG00000028634	Hivep3
ENSMUSG00000042500	Eif2c4
ENSMUSG00000020901	Pik3r5
ENSMUSG00000062372	Otof
ENSMUSG00000030589	Rasgrp4
ENSMUSG00000064043	Trerf1
ENSMUSG00000000552	Zfp385a
ENSMUSG00000037419	Endod1
ENSMUSG00000074785	Plxnc1
ENSMUSG00000034738	Nostrin
ENSMUSG00000023484	Prph
ENSMUSG00000002058	Unc119
ENSMUSG00000024985	Tcf7l2
ENSMUSG00000040322	Slc25a24
ENSMUSG00000062382	Gm10116
ENSMUSG00000040350	Trim7
ENSMUSG00000008475	Arpc5
ENSMUSG00000042726	Trafd1
ENSMUSG00000024338	Psmb8
ENSMUSG00000021127	Zfp36l1
ENSMUSG00000026987	Baz2b
ENSMUSG00000030403	Vasp
ENSMUSG00000042594	Sh2b3
ENSMUSG00000079056	Kcnip3
ENSMUSG00000029213	Commd8
ENSMUSG00000038418	Egr1
ENSMUSG00000002365	Snx9
ENSMUSG00000027506	Tpd52
ENSMUSG00000083679	Gm12892
ENSMUSG00000023349	Clec4n
ENSMUSG00000053101	Gpr141
ENSMUSG00000042599	Jhdm1d
ENSMUSG00000074212	Dnajb14
ENSMUSG00000058881	Zfp516
ENSMUSG00000031246	Sh3bgrl
ENSMUSG00000032012	Pvrl1
ENSMUSG00000037960	1110007C09Rik
ENSMUSG00000029713	Gnb2
ENSMUSG00000020101	4632428N05Rik
ENSMUSG00000021384	Susd3
ENSMUSG00000006281	Tep1
ENSMUSG00000046410	Kcnk6
ENSMUSG00000004562	Arhgef40
ENSMUSG00000040859	Bsdc1
ENSMUSG00000032698	Lmo2
ENSMUSG00000060216	Arrb2
ENSMUSG00000089929	Bcl2a1b
ENSMUSG00000024130	Abca3
ENSMUSG00000017664	Slc35c2
ENSMUSG00000017057	Il13ra1
ENSMUSG00000041164	Zmiz2
ENSMUSG00000060675	Pla2g16
ENSMUSG00000026656	Fcgr2b
ENSMUSG00000030114	Klrg1
ENSMUSG00000031770	Herpud1
ENSMUSG00000067341	H2-Eb2
ENSMUSG00000055235	Wdr86
ENSMUSG00000030530	Furin
ENSMUSG00000003161	Sri
ENSMUSG00000025880	Smad7
ENSMUSG00000008859	Rala
ENSMUSG00000003814	Calr
ENSMUSG00000036053	Fmnl2
ENSMUSG00000026866	Kynu
ENSMUSG00000024798	Htr7
ENSMUSG00000037685	Atp8a1
ENSMUSG00000034744	Nagk
ENSMUSG00000009376	Met
ENSMUSG00000027995	Tlr2
ENSMUSG00000001334	Fndc5
ENSMUSG00000023827	Agpat4
ENSMUSG00000078771	Evi2a
ENSMUSG00000030844	Rgs10
ENSMUSG00000005057	Sh2b2
ENSMUSG00000070044	Fam149a
ENSMUSG00000024952	Rps6ka4
ENSMUSG00000036943	Rab8b
ENSMUSG00000021759	Ppap2a
ENSMUSG00000024247	Pkdcc
ENSMUSG00000036402	Gng12
ENSMUSG00000037185	Krt80
ENSMUSG00000004508	Gab2
ENSMUSG00000051615	Rap2a
ENSMUSG00000039934	Pion
ENSMUSG00000048612	Myof
ENSMUSG00000026158	Ogfrl1
ENSMUSG00000028556	Dock7
ENSMUSG00000019866	Aim1
ENSMUSG00000044468	Fam46c
ENSMUSG00000045573	Penk
ENSMUSG00000042659	Arrdc4
ENSMUSG00000047415	Gpr68
ENSMUSG00000036620	Mgat4b
ENSMUSG00000031875	Cmtm3
ENSMUSG00000001288	Rarg
ENSMUSG00000028478	Clta
ENSMUSG00000051391	Ywhag
ENSMUSG00000040229	Gpr34
ENSMUSG00000002325	Irf9
ENSMUSG00000021608	Lpcat1
ENSMUSG00000028745	Capzb
ENSMUSG00000024986	Hhex
ENSMUSG00000047678	Gpr82
ENSMUSG00000018567	Gabarap
ENSMUSG00000055447	Cd47
ENSMUSG00000028656	Cap1
ENSMUSG00000034663	Bmp2k
ENSMUSG00000037062	Sh3glb1
ENSMUSG00000005103	Wdr1
ENSMUSG00000041132	N4bp2l1
ENSMUSG00000026768	Itga8
ENSMUSG00000006800	Sulf2
ENSMUSG00000027660	Skil
ENSMUSG00000026980	Ly75
ENSMUSG00000056124	B4galt6
ENSMUSG00000028037	Ifi44
ENSMUSG00000048720	Tbc1d12
ENSMUSG00000020021	Fgd6
ENSMUSG00000024675	Ms4a4c
ENSMUSG00000021624	Cd180
ENSMUSG00000021366	Hivep1
ENSMUSG00000020638	Cmpk2
ENSMUSG00000031015	Swap70
ENSMUSG00000006699	Cdc42
ENSMUSG00000003062	Stard3nl
ENSMUSG00000000290	Itgb2
ENSMUSG00000023947	Nfkbie
ENSMUSG00000031264	Btk
ENSMUSG00000034947	Tmem106a
ENSMUSG00000057246	BC051142
ENSMUSG00000034902	Pip5k1c
ENSMUSG00000028793	Rnf19b
ENSMUSG00000027994	Ccdc109b
ENSMUSG00000061436	Hipk2
ENSMUSG00000068036	Mllt4
ENSMUSG00000030102	Itpr1
ENSMUSG00000022769	Sdf2l1
ENSMUSG00000038244	Mical2
ENSMUSG00000041736	Tspo
ENSMUSG00000072596	Ear2
ENSMUSG00000030339	Ltbr
ENSMUSG00000079227	Ccr5
ENSMUSG00000059866	Tnip2
ENSMUSG00000022973	Synj1
ENSMUSG00000044156	Hepacam2
ENSMUSG00000015243	Abca1
ENSMUSG00000053040	Aph1c
ENSMUSG00000039629	Fam40b
ENSMUSG00000073489	Ifi204
ENSMUSG00000026509	Capn2
ENSMUSG00000020821	Kif1c
ENSMUSG00000032000	Birc3
ENSMUSG00000022965	Ifngr2
ENSMUSG00000043323	Fbrsl1
ENSMUSG00000028412	Slc44a1
ENSMUSG00000040061	Plcb2
ENSMUSG00000028159	Dapp1
ENSMUSG00000028300	3110043O21Rik
ENSMUSG00000000753	Serpinf1
ENSMUSG00000026737	Pip4k2a
ENSMUSG00000038679	Trps1
ENSMUSG00000032369	Plscr1
ENSMUSG00000011884	Gltp
ENSMUSG00000004952	Rasa4
ENSMUSG00000029417	Cxcl9
ENSMUSG00000063652	Slc22a21
ENSMUSG00000029804	Herc3
ENSMUSG00000079197	Psme2
ENSMUSG00000022831	Hcls1
ENSMUSG00000067336	Bmpr2
ENSMUSG00000059412	Fxyd2
ENSMUSG00000026123	Plekhb2
ENSMUSG00000026113	Inpp4a
ENSMUSG00000017830	Dhx58
ENSMUSG00000078122	F630028O10Rik
ENSMUSG00000017631	Abr
ENSMUSG00000030592	Ryr1
ENSMUSG00000032666	1700025G04Rik
ENSMUSG00000041836	Ptpre
ENSMUSG00000054428	Atpif1
ENSMUSG00000018401	Mtmr4
ENSMUSG00000049103	Ccr2
ENSMUSG00000041673	Lrrc18
ENSMUSG00000026826	Nr4a2
ENSMUSG00000028494	Plin2
ENSMUSG00000086476	9530059O14Rik
ENSMUSG00000026749	Nek6
ENSMUSG00000020152	Actr2
ENSMUSG00000050921	P2ry10
ENSMUSG00000040663	Clcf1
ENSMUSG00000037902	Sirpa
ENSMUSG00000039145	Camk1d
ENSMUSG00000022184	Fbxo4
ENSMUSG00000039497	Dse
ENSMUSG00000024235	Map3k8
ENSMUSG00000029810	Tmem176b
ENSMUSG00000076441	Ass1
ENSMUSG00000040711	Sh3pxd2b
ENSMUSG00000075415	Fnbp1
ENSMUSG00000046687	Gm5424
ENSMUSG00000023909	Paqr4
ENSMUSG00000049686	Orai1
ENSMUSG00000041959	S100a10
ENSMUSG00000031328	Flna
ENSMUSG00000026727	Rsu1
ENSMUSG00000036553	Sh3tc1
ENSMUSG00000038127	Ccdc50
ENSMUSG00000024014	Pim1
ENSMUSG00000056917	Sipa1
ENSMUSG00000037242	Clic4
ENSMUSG00000002731	Prkra
ENSMUSG00000019872	Smpdl3a
ENSMUSG00000036398	Ppp1r11
ENSMUSG00000000732	Icosl
ENSMUSG00000042842	Serpinb6b
ENSMUSG00000030602	Pak4
ENSMUSG00000073987	Ggh
ENSMUSG00000035722	Abca7
ENSMUSG00000025875	Tspan17
ENSMUSG00000039585	Myo9a
ENSMUSG00000008318	Relt
ENSMUSG00000045319	5430407P10Rik
ENSMUSG00000018821	Avpi1
ENSMUSG00000002489	Tiam1
ENSMUSG00000027363	Usp8
ENSMUSG00000062593	Lilrb4
ENSMUSG00000048897	Zfp710
ENSMUSG00000020941	Map3k14
ENSMUSG00000031453	Rasa3
ENSMUSG00000024835	Coro1b
ENSMUSG00000016283	H2-M2
ENSMUSG00000021552	Gkap1
ENSMUSG00000086869	Gm7809
ENSMUSG00000036611	Eepd1
ENSMUSG00000036832	Lpar3
ENSMUSG00000025227	Tmem180
ENSMUSG00000031103	Elf4
ENSMUSG00000031827	Cotl1
ENSMUSG00000027293	Ehd4
ENSMUSG00000039361	Picalm
ENSMUSG00000028874	Fgr
ENSMUSG00000041390	Mdfic
ENSMUSG00000024053	Emilin2
ENSMUSG00000059923	Grb2
ENSMUSG00000032175	Tyk2
ENSMUSG00000031378	Abcd1
ENSMUSG00000026939	Tmem141
ENSMUSG00000029098	Acox3
ENSMUSG00000022575	Gsdmd
ENSMUSG00000038780	Smurf1
ENSMUSG00000026988	Wdsub1
ENSMUSG00000046157	Tmem229b
ENSMUSG00000035354	Uvrag
ENSMUSG00000052837	Junb
ENSMUSG00000018927	Ccl6
ENSMUSG00000044827	Tlr1
ENSMUSG00000038172	Ttc39b
ENSMUSG00000062545	Tlr12
ENSMUSG00000054702	Ap1s3
ENSMUSG00000051504	Siglech
ENSMUSG00000029415	Sdad1
ENSMUSG00000035133	Arhgap5
ENSMUSG00000021143	Pacs2
ENSMUSG00000000078	Klf6
ENSMUSG00000034006	Pqlc1
ENSMUSG00000042404	Dennd4b
ENSMUSG00000049502	Dtx3l
ENSMUSG00000054626	Xlr
ENSMUSG00000043067	Dpy19l1
ENSMUSG00000090548	Gm17489
ENSMUSG00000032598	Nckipsd
ENSMUSG00000032554	Trf
ENSMUSG00000026104	Stat1
ENSMUSG00000078942	Naip6
ENSMUSG00000015355	Cd48
ENSMUSG00000030413	Pglyrp1
ENSMUSG00000005087	Cd44
ENSMUSG00000022885	St6gal1
ENSMUSG00000015575	Atp6v0e
ENSMUSG00000066442	Mthfs
ENSMUSG00000031760	Mt3
ENSMUSG00000026832	Cytip
ENSMUSG00000030329	C530028O21Rik
ENSMUSG00000039621	Prex1
ENSMUSG00000045374	Wdr81
ENSMUSG00000032336	Nptn
ENSMUSG00000035273	Hpse
ENSMUSG00000049191	Rgag4
ENSMUSG00000073859	Itpripl2
ENSMUSG00000044857	Lemd2
ENSMUSG00000032375	Aph1b
ENSMUSG00000029270	Fam69a
ENSMUSG00000020716	Nf1
ENSMUSG00000001020	S100a4
ENSMUSG00000024854	Pold4
ENSMUSG00000062960	Kdr
ENSMUSG00000022793	B4galt4
ENSMUSG00000000058	Cav2
ENSMUSG00000017781	Pitpna
ENSMUSG00000016664	Pacsin2
ENSMUSG00000001687	Ubl3
ENSMUSG00000010936	Vac14
ENSMUSG00000028843	Sh3bgrl3
ENSMUSG00000005583	Mef2c
ENSMUSG00000040616	Tmem51
ENSMUSG00000028163	Nfkb1
ENSMUSG00000060671	Atp8b2
ENSMUSG00000030257	Srgap3
ENSMUSG00000055069	Rab39
ENSMUSG00000034761	Map4k5
ENSMUSG00000026944	Abca2
ENSMUSG00000020476	Dbnl
ENSMUSG00000024055	Cyp4f13
ENSMUSG00000025813	Homer2
ENSMUSG00000032602	Slc25a20
ENSMUSG00000033192	Lpcat2
ENSMUSG00000033933	Vhl
ENSMUSG00000061778	Mospd2
ENSMUSG00000017144	Rnd3
ENSMUSG00000024079	Eif2ak2
ENSMUSG00000005686	Ampd3
ENSMUSG00000033721	Vav3
ENSMUSG00000026112	6330578E17Rik
ENSMUSG00000049037	Clec4a1
ENSMUSG00000025198	Erlin1
ENSMUSG00000025163	Cd7
ENSMUSG00000044477	Zfand3
ENSMUSG00000029661	Col1a2
ENSMUSG00000027452	Acss1
ENSMUSG00000048232	Fbxo10
ENSMUSG00000055148	Klf2
ENSMUSG00000028552	Eps15
ENSMUSG00000092572	Serpinb10-ps
ENSMUSG00000031591	Asah1
ENSMUSG00000032068	1600029D21Rik
ENSMUSG00000050912	Tmem123
ENSMUSG00000022443	Myh9
ENSMUSG00000028967	Errfi1
ENSMUSG00000000555	Itga5
ENSMUSG00000078429	Ctdsp2
ENSMUSG00000028464	Tpm2
ENSMUSG00000075284	Wipf1
ENSMUSG00000050549	5730508B09Rik
ENSMUSG00000030720	Cln3
ENSMUSG00000037860	Aim2
ENSMUSG00000032497	Lrrfip2
ENSMUSG00000038170	Pde4dip
ENSMUSG00000032434	Cmtm6
ENSMUSG00000032872	Cyb5r4
ENSMUSG00000039943	Plcb4
ENSMUSG00000001847	Rac1
ENSMUSG00000049881	2810025M15Rik
ENSMUSG00000055065	Ddx17
ENSMUSG00000000386	Mx1
ENSMUSG00000039735	Fnbp1l
ENSMUSG00000020437	Myo1g
ENSMUSG00000024870	Rab1b
ENSMUSG00000061731	Ext1
ENSMUSG00000085531	Gm12233
ENSMUSG00000034850	Tmem127
ENSMUSG00000015733	Capza2
ENSMUSG00000038212	Hiatl1
ENSMUSG00000022103	Gfra2
ENSMUSG00000047454	Gphn
ENSMUSG00000000318	Clec10a
ENSMUSG00000035356	Nfkbiz
ENSMUSG00000053310	Nrgn
ENSMUSG00000039395	Mreg
ENSMUSG00000021559	Dapk1
ENSMUSG00000024404	Riok3
ENSMUSG00000066440	Zfyve26
ENSMUSG00000042328	Hps4
ENSMUSG00000031431	Tsc22d3
ENSMUSG00000075404	Ciita
ENSMUSG00000060477	Irak2
ENSMUSG00000046808	Atp10d
ENSMUSG00000030560	Ctsc
ENSMUSG00000028161	Ppp3ca
ENSMUSG00000017774	Myo1c
ENSMUSG00000006301	Tmbim1
ENSMUSG00000038023	Atp6v0a2
ENSMUSG00000092274	Neat1
ENSMUSG00000038517	Tbkbp1
ENSMUSG00000035713	Usp35
ENSMUSG00000022967	Ifnar1
ENSMUSG00000031570	Ppapdc1b
ENSMUSG00000004771	Rab11a
ENSMUSG00000000346	Dazap2
ENSMUSG00000034312	Iqsec1
ENSMUSG00000082286	Pisd-ps1
ENSMUSG00000030536	Iqgap1
ENSMUSG00000030231	Plekha5
ENSMUSG00000020709	Adap2
ENSMUSG00000041439	Mfsd6
ENSMUSG00000027957	Slc35a3
ENSMUSG00000030341	Tnfrsf1a
ENSMUSG00000032470	Mras
ENSMUSG00000027932	Slc27a3
ENSMUSG00000055994	Nod2
ENSMUSG00000018559	Ctdnep1
ENSMUSG00000026827	Gpd2
ENSMUSG00000029992	Gfpt1
ENSMUSG00000028923	Necap2
ENSMUSG00000023915	Tnfrsf21
ENSMUSG00000038059	2010002N04Rik
ENSMUSG00000025856	Pdgfa
ENSMUSG00000018930	Ccl4
ENSMUSG00000025810	Nrp1
ENSMUSG00000030747	Dgat2
ENSMUSG00000000303	Cdh1
ENSMUSG00000024851	Pitpnm1
ENSMUSG00000001750	Tcirg1
ENSMUSG00000022641	Bbx
ENSMUSG00000051314	Ffar2
ENSMUSG00000044317	Gpr4
ENSMUSG00000038217	Tlcd2
ENSMUSG00000040943	Tet2
ENSMUSG00000032290	Ptpn9
ENSMUSG00000035469	Rcbtb1
ENSMUSG00000059883	Irak4
ENSMUSG00000036452	Arhgap26
ENSMUSG00000061288	Taok3
ENSMUSG00000072109	A530040E14Rik
ENSMUSG00000028480	Glipr2
ENSMUSG00000052821	Cysltr1
ENSMUSG00000065954	Tacc1
ENSMUSG00000046722	Cdc42se1
ENSMUSG00000066406	Akap13
ENSMUSG00000043157	Arl11
ENSMUSG00000025060	Slk
ENSMUSG00000034652	Cd300a
ENSMUSG00000087150	BC064078
ENSMUSG00000020828	Pld2
ENSMUSG00000026637	Traf5
ENSMUSG00000073412	Lst1
ENSMUSG00000032020	Ubash3b
ENSMUSG00000071203	Naip5
ENSMUSG00000028914	Casp9
ENSMUSG00000015340	Cybb
ENSMUSG00000036206	Sh3bp4
ENSMUSG00000014602	Kif1a
ENSMUSG00000030583	Sipa1l3
ENSMUSG00000039157	Fam102a
ENSMUSG00000061175	Fnip2
ENSMUSG00000050821	Fam131a
ENSMUSG00000030101	Sumf1
ENSMUSG00000025888	Casp1
ENSMUSG00000002997	Prkar2b
ENSMUSG00000037995	Igsf9
ENSMUSG00000020198	Ap3d1
ENSMUSG00000022378	Fam49b
ENSMUSG00000000531	Grasp
ENSMUSG00000047747	Rnf150
ENSMUSG00000079298	Klrb1b
ENSMUSG00000027087	Itgav
ENSMUSG00000047139	Cd24a
ENSMUSG00000038235	F11r
ENSMUSG00000022488	Nckap1l
ENSMUSG00000036833	Pnpla7
ENSMUSG00000032489	Kif9
ENSMUSG00000000627	Sema4f
ENSMUSG00000090841	Myl6
ENSMUSG00000055024	Ep300
ENSMUSG00000004451	Ralb
ENSMUSG00000031133	Arhgef6
ENSMUSG00000047963	Stbd1
ENSMUSG00000018707	Dync1h1
ENSMUSG00000016528	Mapkapk2
ENSMUSG00000076609	Igkc
ENSMUSG00000067212	H2-T23
ENSMUSG00000092222	Gm20506
ENSMUSG00000024283	Wac
ENSMUSG00000025503	Taldo1
ENSMUSG00000030096	Slc6a6
ENSMUSG00000027078	Ube2l6
ENSMUSG00000027555	Car13
ENSMUSG00000016534	Lamp2
ENSMUSG00000040188	Scamp2
ENSMUSG00000055826	1700008P20Rik
ENSMUSG00000061665	Cd2ap
ENSMUSG00000029304	Spp1
ENSMUSG00000020841	Cpd
ENSMUSG00000073490	AI607873
ENSMUSG00000030711	Sult1a1
ENSMUSG00000040249	Lrp1
ENSMUSG00000021281	Tnfaip2
ENSMUSG00000042082	Arsb
ENSMUSG00000003559	As3mt
ENSMUSG00000031605	Klhl2
ENSMUSG00000026342	Slc35f5
ENSMUSG00000035021	Baz1a
ENSMUSG00000051682	Treml4
ENSMUSG00000048440	Cyp4f16
ENSMUSG00000003541	Ier3
ENSMUSG00000000861	Bcl11a
ENSMUSG00000026864	Hspa5
ENSMUSG00000054091	1810037I17Rik
ENSMUSG00000075702	Selm
ENSMUSG00000023904	Hcfc1r1
ENSMUSG00000041926	Rnpep
ENSMUSG00000090164	BC035044
ENSMUSG00000032038	St3gal4
ENSMUSG00000016487	Ppfibp1
ENSMUSG00000054920	Klhl5
ENSMUSG00000025314	Ptprj
ENSMUSG00000003352	Cacnb3
ENSMUSG00000041235	Chd7
ENSMUSG00000041354	Rgl2
ENSMUSG00000015932	Dstn
ENSMUSG00000082062	Ftl2
ENSMUSG00000049553	Polr1a
ENSMUSG00000021094	Dhrs7
ENSMUSG00000054000	Tusc1
ENSMUSG00000024457	Trim26
ENSMUSG00000073755	5730409E04Rik
ENSMUSG00000050445	Cyp8b1
ENSMUSG00000025278	Flnb
ENSMUSG00000032601	Prkar2a
ENSMUSG00000038264	Sema7a
ENSMUSG00000074141	Il4i1
ENSMUSG00000028249	Sdcbp
ENSMUSG00000027822	Slc33a1
ENSMUSG00000037119	D15Ertd621e
ENSMUSG00000050212	Fam176b
ENSMUSG00000091971	Hspa1a
ENSMUSG00000049647	Purb
ENSMUSG00000030352	Tspan9
ENSMUSG00000028007	Snx7
ENSMUSG00000053477	Tcf4
ENSMUSG00000039942	Ptger4
ENSMUSG00000039308	Ndst2
ENSMUSG00000028173	Wls
ENSMUSG00000027993	Trim2
ENSMUSG00000004730	Emr1
ENSMUSG00000048578	Mlec
ENSMUSG00000019850	Tnfaip3
ENSMUSG00000085930	2310001H17Rik
ENSMUSG00000032812	Arap1
ENSMUSG00000020827	Mink1
ENSMUSG00000023143	Nagpa
ENSMUSG00000044667	D3Bwg0562e
ENSMUSG00000022844	Pdia5
ENSMUSG00000027544	Nfatc2
ENSMUSG00000091337	Eid1
ENSMUSG00000001089	Luzp1
ENSMUSG00000001542	Ell2
ENSMUSG00000036918	Ttc7
ENSMUSG00000029291	Rufy3
ENSMUSG00000004698	Hdac9
ENSMUSG00000026956	Uap1l1
ENSMUSG00000027187	Cat
ENSMUSG00000005950	P2rx5
ENSMUSG00000054792	Klhl18
ENSMUSG00000003154	Foxj2
ENSMUSG00000013707	Tnfaip8l2
ENSMUSG00000063605	Ccdc102a
ENSMUSG00000035847	Ids
ENSMUSG00000024639	Gnaq
ENSMUSG00000071286	Ankrd57
ENSMUSG00000038034	Igsf8
ENSMUSG00000040183	Ankrd6
ENSMUSG00000001794	Capns1
ENSMUSG00000022969	Il10rb
ENSMUSG00000037944	Ccr7
ENSMUSG00000039043	2610034B18Rik
ENSMUSG00000033777	Tlr13
ENSMUSG00000026131	Dst
ENSMUSG00000031207	Msn
ENSMUSG00000031805	Jak3
ENSMUSG00000031659	Adcy7
ENSMUSG00000035376	Ptplb
ENSMUSG00000039377	Hlx
ENSMUSG00000057522	Spop
ENSMUSG00000061455	Stx17
ENSMUSG00000023367	Tmem176a
ENSMUSG00000045827	Serpinb9
ENSMUSG00000053510	Nrd1
ENSMUSG00000019659	Ccdc12
ENSMUSG00000050373	Snx21
ENSMUSG00000000631	Myo18a
ENSMUSG00000020893	Per1
ENSMUSG00000049076	Acap2
ENSMUSG00000036459	Wtip
ENSMUSG00000030161	Gabarapl1
ENSMUSG00000041995	Zbed3
ENSMUSG00000022372	Sla
ENSMUSG00000054611	Kdm2a
ENSMUSG00000025498	Irf7
ENSMUSG00000073144	4930599N23Rik
ENSMUSG00000035900	Gramd4
ENSMUSG00000025795	Rassf3
ENSMUSG00000033382	Trappc8
ENSMUSG00000074151	Nlrc5
ENSMUSG00000054619	Mettl7a1
ENSMUSG00000026970	Rbms1
ENSMUSG00000026009	Icos
ENSMUSG00000042742	B630005N14Rik
ENSMUSG00000033940	6720456B07Rik
ENSMUSG00000047810	Ccdc88b
ENSMUSG00000029470	P2rx4
ENSMUSG00000019590	Cyb561
ENSMUSG00000024169	Ift140
ENSMUSG00000031652	N4bp1
ENSMUSG00000029454	Mapkapk5
ENSMUSG00000040339	Fam102b
ENSMUSG00000043943	Naalad2
ENSMUSG00000020275	Rel
ENSMUSG00000074580	4931440P22Rik
ENSMUSG00000055675	Kbtbd11
ENSMUSG00000026623	Lpgat1
ENSMUSG00000035093	Secisbp2l
ENSMUSG00000075118	Gpr137b-ps
ENSMUSG00000028207	Asph
ENSMUSG00000003382	Etv3
ENSMUSG00000040712	Camta2
ENSMUSG00000047281	Sfn
ENSMUSG00000062753	AI413582
ENSMUSG00000027615	Hps3
ENSMUSG00000020651	Slc26a4
ENSMUSG00000032640	Chsy1
ENSMUSG00000020926	Adam11
ENSMUSG00000011148	Adssl1
ENSMUSG00000039911	Spsb1
ENSMUSG00000029064	Gnb1
ENSMUSG00000023830	Igf2r
ENSMUSG00000027007	Ssfa2
ENSMUSG00000004040	Stat3
ENSMUSG00000036555	Iqce
ENSMUSG00000020048	Hsp90b1
ENSMUSG00000030970	Ctbp2
ENSMUSG00000044092	C130050O18Rik
ENSMUSG00000062127	Cttnbp2nl
ENSMUSG00000022508	Bcl6
ENSMUSG00000030688	Stard10
ENSMUSG00000006344	Ggt5
ENSMUSG00000035673	Sbno2
ENSMUSG00000002504	Slc9a3r2
ENSMUSG00000032596	Uba7
ENSMUSG00000048216	Gpr85
ENSMUSG00000025239	Limd1
ENSMUSG00000014075	Tctex1d2
ENSMUSG00000047371	Zfp768
ENSMUSG00000021871	Pnp
ENSMUSG00000003934	Efnb3
ENSMUSG00000023048	Prr13
ENSMUSG00000084817	Gm5526
ENSMUSG00000020100	Slc29a3
ENSMUSG00000042622	Maff
ENSMUSG00000039976	Tbc1d16
ENSMUSG00000044162	Tnip3
ENSMUSG00000055546	Timd4
ENSMUSG00000030748	Il4ra
ENSMUSG00000029797	Sspo
ENSMUSG00000067924	Cxx1b
ENSMUSG00000026073	Il1r2
ENSMUSG00000031367	Ap1s2
ENSMUSG00000036067	Slc2a6
ENSMUSG00000056671	Prelid2
ENSMUSG00000033033	Calhm2
ENSMUSG00000035778	Ggta1
ENSMUSG00000034640	Tiparp
ENSMUSG00000031880	Rrad
ENSMUSG00000020134	Peli1
ENSMUSG00000087450	Gm13994
ENSMUSG00000087052	Gm8093
ENSMUSG00000025404	R3hdm2
ENSMUSG00000030269	Mtmr14
ENSMUSG00000042289	Hsd3b7
ENSMUSG00000002668	Dennd1c
ENSMUSG00000053012	Krcc1
ENSMUSG00000032120	C2cd2l
ENSMUSG00000067591	Klra3
ENSMUSG00000038068	Rnf144b
ENSMUSG00000051851	Cxx1c
ENSMUSG00000011267	Zfp296
ENSMUSG00000019088	Dnase1l1
ENSMUSG00000056608	Chd9
ENSMUSG00000048865	Arhgap30
ENSMUSG00000026796	Fam129b
ENSMUSG00000021375	Kif13a
ENSMUSG00000032382	Snx1
ENSMUSG00000087271	2900008C10Rik
ENSMUSG00000030107	Usp18

## Sheet: SPI1 target genes
Supplementary File 4.The genes list of SPI1 target genes(710) reported in the figure4A
Gene ID	Gene name
ENSMUSG00000042742	B630005N14Rik
ENSMUSG00000024621	Csf1r
ENSMUSG00000058099	Nfam1
ENSMUSG00000042404	Dennd4b
ENSMUSG00000062127	Cttnbp2nl
ENSMUSG00000031591	Asah1
ENSMUSG00000037731	BC013712
ENSMUSG00000003814	Calr
ENSMUSG00000019850	Tnfaip3
ENSMUSG00000050912	Tmem123
ENSMUSG00000030774	Pak1
ENSMUSG00000009418	Nav1
ENSMUSG00000058715	Fcer1g
ENSMUSG00000074785	Plxnc1
ENSMUSG00000055447	Cd47
ENSMUSG00000045827	Serpinb9
ENSMUSG00000031015	Swap70
ENSMUSG00000026879	Gsn
ENSMUSG00000042228	Lyn
ENSMUSG00000042594	Sh2b3
ENSMUSG00000008859	Rala
ENSMUSG00000022769	Sdf2l1
ENSMUSG00000026342	Slc35f5
ENSMUSG00000040711	Sh3pxd2b
ENSMUSG00000006304	Arpc2
ENSMUSG00000021978	Extl3
ENSMUSG00000039315	Clnk
ENSMUSG00000016534	Lamp2
ENSMUSG00000048120	Entpd1
ENSMUSG00000039191	Rbpj
ENSMUSG00000022901	Cd86
ENSMUSG00000015340	Cybb
ENSMUSG00000015733	Capza2
ENSMUSG00000018585	Atox1
ENSMUSG00000042082	Arsb
ENSMUSG00000038170	Pde4dip
ENSMUSG00000031639	Tlr3
ENSMUSG00000021218	Gdi2
ENSMUSG00000005087	Cd44
ENSMUSG00000030101	Sumf1
ENSMUSG00000042726	Trafd1
ENSMUSG00000030691	Fchsd2
ENSMUSG00000053063	Clec12a
ENSMUSG00000031799	Tpm4
ENSMUSG00000053158	Fes
ENSMUSG00000023143	Nagpa
ENSMUSG00000043067	Dpy19l1
ENSMUSG00000020716	Nf1
ENSMUSG00000041362	4930506M07Rik
ENSMUSG00000039497	Dse
ENSMUSG00000000078	Klf6
ENSMUSG00000026956	Uap1l1
ENSMUSG00000053101	Gpr141
ENSMUSG00000037419	Endod1
ENSMUSG00000026637	Traf5
ENSMUSG00000020821	Kif1c
ENSMUSG00000020100	Slc29a3
ENSMUSG00000024053	Emilin2
ENSMUSG00000005947	Itgae
ENSMUSG00000030681	Mvp
ENSMUSG00000026970	Rbms1
ENSMUSG00000020399	Havcr2
ENSMUSG00000021596	Mctp1
ENSMUSG00000037119	D15Ertd621e
ENSMUSG00000054091	1810037I17Rik
ENSMUSG00000024659	Anxa1
ENSMUSG00000005583	Mef2c
ENSMUSG00000031133	Arhgef6
ENSMUSG00000026875	Traf1
ENSMUSG00000019866	Aim1
ENSMUSG00000059883	Irak4
ENSMUSG00000031367	Ap1s2
ENSMUSG00000024190	Dusp1
ENSMUSG00000023022	Lima1
ENSMUSG00000023947	Nfkbie
ENSMUSG00000034850	Tmem127
ENSMUSG00000022636	Alcam
ENSMUSG00000034744	Nagk
ENSMUSG00000000861	Bcl11a
ENSMUSG00000015846	Rxra
ENSMUSG00000035273	Hpse
ENSMUSG00000004508	Gab2
ENSMUSG00000079227	Ccr5
ENSMUSG00000003032	Klf4
ENSMUSG00000021725	Parp8
ENSMUSG00000022659	Gcet2
ENSMUSG00000052837	Junb
ENSMUSG00000044092	C130050O18Rik
ENSMUSG00000032369	Plscr1
ENSMUSG00000035493	Tgfbi
ENSMUSG00000022372	Sla
ENSMUSG00000044447	Dock5
ENSMUSG00000022641	Bbx
ENSMUSG00000029484	Anxa3
ENSMUSG00000022436	Sh3bp1
ENSMUSG00000001175	Calm1
ENSMUSG00000022793	B4galt4
ENSMUSG00000027363	Usp8
ENSMUSG00000018774	Cd68
ENSMUSG00000028914	Casp9
ENSMUSG00000060477	Irak2
ENSMUSG00000040183	Ankrd6
ENSMUSG00000071714	Csf2rb2
ENSMUSG00000030161	Gabarapl1
ENSMUSG00000031827	Cotl1
ENSMUSG00000003518	Dusp3
ENSMUSG00000020253	Ppm1m
ENSMUSG00000057530	Ece1
ENSMUSG00000024404	Riok3
ENSMUSG00000061689	Dlgap4
ENSMUSG00000017664	Slc35c2
ENSMUSG00000000290	Itgb2
ENSMUSG00000040659	Efhd2
ENSMUSG00000035376	Ptplb
ENSMUSG00000032470	Mras
ENSMUSG00000038059	2010002N04Rik
ENSMUSG00000030055	Rab43
ENSMUSG00000037944	Ccr7
ENSMUSG00000020152	Actr2
ENSMUSG00000054428	Atpif1
ENSMUSG00000022500	Litaf
ENSMUSG00000030592	Ryr1
ENSMUSG00000040061	Plcb2
ENSMUSG00000037242	Clic4
ENSMUSG00000021384	Susd3
ENSMUSG00000002668	Dennd1c
ENSMUSG00000050232	Cxcr3
ENSMUSG00000020644	Id2
ENSMUSG00000040188	Scamp2
ENSMUSG00000032497	Lrrfip2
ENSMUSG00000052056	Zfp217
ENSMUSG00000036402	Gng12
ENSMUSG00000024055	Cyp4f13
ENSMUSG00000029098	Acox3
ENSMUSG00000024338	Psmb8
ENSMUSG00000021025	Nfkbia
ENSMUSG00000072620	Slfn2
ENSMUSG00000027932	Slc27a3
ENSMUSG00000032012	Pvrl1
ENSMUSG00000051391	Ywhag
ENSMUSG00000054000	Tusc1
ENSMUSG00000028412	Slc44a1
ENSMUSG00000045374	Wdr81
ENSMUSG00000024334	H2-Oa
ENSMUSG00000006611	Hfe
ENSMUSG00000021127	Zfp36l1
ENSMUSG00000000682	Cd52
ENSMUSG00000002489	Tiam1
ENSMUSG00000036499	Eea1
ENSMUSG00000003154	Foxj2
ENSMUSG00000047139	Cd24a
ENSMUSG00000028581	Laptm5
ENSMUSG00000000555	Itga5
ENSMUSG00000030536	Iqgap1
ENSMUSG00000026628	Atf3
ENSMUSG00000036046	5031439G07Rik
ENSMUSG00000025239	Limd1
ENSMUSG00000027187	Cat
ENSMUSG00000042129	Rassf4
ENSMUSG00000032489	Kif9
ENSMUSG00000078429	Ctdsp2
ENSMUSG00000003559	As3mt
ENSMUSG00000027639	Samhd1
ENSMUSG00000023827	Agpat4
ENSMUSG00000062825	Actg1
ENSMUSG00000031264	Btk
ENSMUSG00000030468	Siglecg
ENSMUSG00000025225	Nfkb2
ENSMUSG00000019998	Stx7
ENSMUSG00000027007	Ssfa2
ENSMUSG00000001847	Rac1
ENSMUSG00000027506	Tpd52
ENSMUSG00000006699	Cdc42
ENSMUSG00000033940	6720456B07Rik
ENSMUSG00000018909	Arrb1
ENSMUSG00000025163	Cd7
ENSMUSG00000022443	Myh9
ENSMUSG00000032554	Trf
ENSMUSG00000047747	Rnf150
ENSMUSG00000026939	Tmem141
ENSMUSG00000009687	Fxyd5
ENSMUSG00000025880	Smad7
ENSMUSG00000066406	Akap13
ENSMUSG00000047371	Zfp768
ENSMUSG00000032434	Cmtm6
ENSMUSG00000032754	Slc24a6
ENSMUSG00000022540	Rogdi
ENSMUSG00000000627	Sema4f
ENSMUSG00000040268	Plekha1
ENSMUSG00000038543	BC028528
ENSMUSG00000032068	1600029D21Rik
ENSMUSG00000036381	P2ry14
ENSMUSG00000000058	Cav2
ENSMUSG00000030257	Srgap3
ENSMUSG00000035021	Baz1a
ENSMUSG00000025534	Gusb
ENSMUSG00000074580	4931440P22Rik
ENSMUSG00000032000	Birc3
ENSMUSG00000060131	Atp8b4
ENSMUSG00000020101	4632428N05Rik
ENSMUSG00000032462	Pik3cb
ENSMUSG00000001473	Tubb6
ENSMUSG00000022263	Trio
ENSMUSG00000004730	Emr1
ENSMUSG00000064043	Trerf1
ENSMUSG00000015950	Ncf1
ENSMUSG00000065954	Tacc1
ENSMUSG00000003283	Hck
ENSMUSG00000000531	Grasp
ENSMUSG00000000594	Gm2a
ENSMUSG00000025232	Hexa
ENSMUSG00000026833	Olfm1
ENSMUSG00000039145	Camk1d
ENSMUSG00000032175	Tyk2
ENSMUSG00000032038	St3gal4
ENSMUSG00000028923	Necap2
ENSMUSG00000026131	Dst
ENSMUSG00000005142	Man2b1
ENSMUSG00000002204	Napsa
ENSMUSG00000041235	Chd7
ENSMUSG00000020134	Peli1
ENSMUSG00000038679	Trps1
ENSMUSG00000032089	Il10ra
ENSMUSG00000037185	Krt80
ENSMUSG00000055024	Ep300
ENSMUSG00000042622	Maff
ENSMUSG00000042817	Flt3
ENSMUSG00000054792	Klhl18
ENSMUSG00000025017	Pik3ap1
ENSMUSG00000034330	Plcg2
ENSMUSG00000024308	Tapbp
ENSMUSG00000031328	Flna
ENSMUSG00000005125	Ndrg1
ENSMUSG00000030231	Plekha5
ENSMUSG00000028657	Ppt1
ENSMUSG00000000732	Icosl
ENSMUSG00000073411	H2-D1
ENSMUSG00000028654	Mycl1
ENSMUSG00000000346	Dazap2
ENSMUSG00000038780	Smurf1
ENSMUSG00000048897	Zfp710
ENSMUSG00000025503	Taldo1
ENSMUSG00000032872	Cyb5r4
ENSMUSG00000021624	Cd180
ENSMUSG00000017631	Abr
ENSMUSG00000036273	Lrrk2
ENSMUSG00000004040	Stat3
ENSMUSG00000005686	Ampd3
ENSMUSG00000030403	Vasp
ENSMUSG00000048232	Fbxo10
ENSMUSG00000031453	Rasa3
ENSMUSG00000042842	Serpinb6b
ENSMUSG00000017774	Myo1c
ENSMUSG00000037548	H2-DMb2
ENSMUSG00000036918	Ttc7
ENSMUSG00000036620	Mgat4b
ENSMUSG00000020423	Btg2
ENSMUSG00000002058	Unc119
ENSMUSG00000038264	Sema7a
ENSMUSG00000056515	Rab31
ENSMUSG00000027947	Il6ra
ENSMUSG00000022892	App
ENSMUSG00000021366	Hivep1
ENSMUSG00000030102	Itpr1
ENSMUSG00000049191	Rgag4
ENSMUSG00000066152	Slc31a2
ENSMUSG00000030748	Il4ra
ENSMUSG00000038034	Igsf8
ENSMUSG00000031805	Jak3
ENSMUSG00000070354	Evi2b
ENSMUSG00000050075	Gpr171
ENSMUSG00000018927	Ccl6
ENSMUSG00000032382	Snx1
ENSMUSG00000022508	Bcl6
ENSMUSG00000038023	Atp6v0a2
ENSMUSG00000029322	Plac8
ENSMUSG00000024798	Htr7
ENSMUSG00000035354	Uvrag
ENSMUSG00000055401	Fbxo6
ENSMUSG00000057246	BC051142
ENSMUSG00000073412	Lst1
ENSMUSG00000024854	Pold4
ENSMUSG00000075284	Wipf1
ENSMUSG00000040616	Tmem51
ENSMUSG00000037685	Atp8a1
ENSMUSG00000060671	Atp8b2
ENSMUSG00000026407	Cacna1s
ENSMUSG00000004952	Rasa4
ENSMUSG00000044857	Lemd2
ENSMUSG00000049647	Purb
ENSMUSG00000003382	Etv3
ENSMUSG00000020859	Spag9
ENSMUSG00000029771	Irf5
ENSMUSG00000011267	Zfp296
ENSMUSG00000030602	Pak4
ENSMUSG00000027907	S100a11
ENSMUSG00000058881	Zfp516
ENSMUSG00000021998	Lcp1
ENSMUSG00000024952	Rps6ka4
ENSMUSG00000018930	Ccl4
ENSMUSG00000026358	Rgs1
ENSMUSG00000002885	Cd97
ENSMUSG00000011148	Adssl1
ENSMUSG00000031605	Klhl2
ENSMUSG00000062545	Tlr12
ENSMUSG00000026288	Inpp5d
ENSMUSG00000028843	Sh3bgrl3
ENSMUSG00000015766	Eps8
ENSMUSG00000020841	Cpd
ENSMUSG00000038179	Slamf7
ENSMUSG00000027994	Ccdc109b
ENSMUSG00000051339	2900026A02Rik
ENSMUSG00000050732	Vamp8
ENSMUSG00000056917	Sipa1
ENSMUSG00000048440	Cyp4f16
ENSMUSG00000020437	Myo1g
ENSMUSG00000018707	Dync1h1
ENSMUSG00000039395	Mreg
ENSMUSG00000063856	Gpx1
ENSMUSG00000020275	Rel
ENSMUSG00000026271	Gpr35
ENSMUSG00000036553	Sh3tc1
ENSMUSG00000047415	Gpr68
ENSMUSG00000021143	Pacs2
ENSMUSG00000041390	Mdfic
ENSMUSG00000053012	Krcc1
ENSMUSG00000038517	Tbkbp1
ENSMUSG00000001334	Fndc5
ENSMUSG00000075415	Fnbp1
ENSMUSG00000040950	Mgl2
ENSMUSG00000062593	Lilrb4
ENSMUSG00000026827	Gpd2
ENSMUSG00000001128	Cfp
ENSMUSG00000029470	P2rx4
ENSMUSG00000032602	Slc25a20
ENSMUSG00000043157	Arl11
ENSMUSG00000068566	Myadm
ENSMUSG00000031627	Irf2
ENSMUSG00000027452	Acss1
ENSMUSG00000016206	H2-M3
ENSMUSG00000028161	Ppp3ca
ENSMUSG00000003134	Tbc1d8
ENSMUSG00000049881	2810025M15Rik
ENSMUSG00000026728	Vim
ENSMUSG00000024937	Ehbp1l1
ENSMUSG00000045326	Fndc7
ENSMUSG00000039911	Spsb1
ENSMUSG00000004207	Psap
ENSMUSG00000031097	Tnni2
ENSMUSG00000027615	Hps3
ENSMUSG00000030342	Cd9
ENSMUSG00000056608	Chd9
ENSMUSG00000024013	Fgd2
ENSMUSG00000021375	Kif13a
ENSMUSG00000032076	Cadm1
ENSMUSG00000048277	Syngr2
ENSMUSG00000027660	Skil
ENSMUSG00000034792	Gna15
ENSMUSG00000001687	Ubl3
ENSMUSG00000018819	Lsp1
ENSMUSG00000005672	Kit
ENSMUSG00000061577	Gpr114
ENSMUSG00000001288	Rarg
ENSMUSG00000055069	Rab39
ENSMUSG00000027993	Trim2
ENSMUSG00000041354	Rgl2
ENSMUSG00000002365	Snx9
ENSMUSG00000024283	Wac
ENSMUSG00000027822	Slc33a1
ENSMUSG00000030789	Itgax
ENSMUSG00000079056	Kcnip3
ENSMUSG00000020941	Map3k14
ENSMUSG00000004451	Ralb
ENSMUSG00000020097	Sgpl1
ENSMUSG00000052688	5430435G22Rik
ENSMUSG00000062960	Kdr
ENSMUSG00000022103	Gfra2
ENSMUSG00000000530	Acvrl1
ENSMUSG00000020077	Srgn
ENSMUSG00000008475	Arpc5
ENSMUSG00000061436	Hipk2
ENSMUSG00000040322	Slc25a24
ENSMUSG00000046805	Mpeg1
ENSMUSG00000020120	Plek
ENSMUSG00000003123	Lipe
ENSMUSG00000030583	Sipa1l3
ENSMUSG00000020422	Tns3
ENSMUSG00000018401	Mtmr4
ENSMUSG00000018340	Anxa6
ENSMUSG00000048865	Arhgap30
ENSMUSG00000032598	Nckipsd
ENSMUSG00000024789	Jak2
ENSMUSG00000027995	Tlr2
ENSMUSG00000021200	Asb2
ENSMUSG00000033083	Tbc1d4
ENSMUSG00000062753	AI413582
ENSMUSG00000028967	Errfi1
ENSMUSG00000026158	Ogfrl1
ENSMUSG00000020827	Mink1
ENSMUSG00000051682	Treml4
ENSMUSG00000037860	Aim2
ENSMUSG00000005057	Sh2b2
ENSMUSG00000020021	Fgd6
ENSMUSG00000024521	Pmaip1
ENSMUSG00000038418	Egr1
ENSMUSG00000026170	Cyp27a1
ENSMUSG00000036067	Slc2a6
ENSMUSG00000027544	Nfatc2
ENSMUSG00000011884	Gltp
ENSMUSG00000038976	Ppp1r9b
ENSMUSG00000025473	Adam8
ENSMUSG00000053310	Nrgn
ENSMUSG00000028525	Pde4b
ENSMUSG00000054702	Ap1s3
ENSMUSG00000027422	Rrbp1
ENSMUSG00000026535	Ifi202b
ENSMUSG00000056708	Ier5
ENSMUSG00000029570	Lfng
ENSMUSG00000042500	Eif2c4
ENSMUSG00000030447	Cyfip1
ENSMUSG00000001281	Itgb7
ENSMUSG00000074141	Il4i1
ENSMUSG00000037580	Gch1
ENSMUSG00000028207	Asph
ENSMUSG00000035778	Ggta1
ENSMUSG00000021871	Pnp
ENSMUSG00000033721	Vav3
ENSMUSG00000019876	Pkib
ENSMUSG00000039361	Picalm
ENSMUSG00000010936	Vac14
ENSMUSG00000041673	Lrrc18
ENSMUSG00000001020	S100a4
ENSMUSG00000020828	Pld2
ENSMUSG00000025404	R3hdm2
ENSMUSG00000029622	Arpc1b
ENSMUSG00000022844	Pdia5
ENSMUSG00000003541	Ier3
ENSMUSG00000036908	Unc93b1
ENSMUSG00000015396	Cd83
ENSMUSG00000032231	Anxa2
ENSMUSG00000005103	Wdr1
ENSMUSG00000006519	Cyba
ENSMUSG00000030560	Ctsc
ENSMUSG00000003545	Fosb
ENSMUSG00000020893	Per1
ENSMUSG00000029552	Tes
ENSMUSG00000028673	Fuca1
ENSMUSG00000028874	Fgr
ENSMUSG00000034312	Iqsec1
ENSMUSG00000035212	Leprot
ENSMUSG00000025809	Itgb1
ENSMUSG00000031207	Msn
ENSMUSG00000026623	Lpgat1
ENSMUSG00000041538	H2-Ob
ENSMUSG00000037062	Sh3glb1
ENSMUSG00000023048	Prr13
ENSMUSG00000015745	Plekho1
ENSMUSG00000025743	Sdc3
ENSMUSG00000027087	Itgav
ENSMUSG00000030747	Dgat2
ENSMUSG00000044456	Rin3
ENSMUSG00000025810	Nrp1
ENSMUSG00000004771	Rab11a
ENSMUSG00000028063	Lmna
ENSMUSG00000052160	Pld4
ENSMUSG00000002111	Sfpi1
ENSMUSG00000018821	Avpi1
ENSMUSG00000021559	Dapk1
ENSMUSG00000001089	Luzp1
ENSMUSG00000059326	Csf2ra
ENSMUSG00000036594	H2-Aa
ENSMUSG00000031378	Abcd1
ENSMUSG00000041515	Irf8
ENSMUSG00000026458	Ppfia4
ENSMUSG00000020635	Fkbp1b
ENSMUSG00000002944	Cd36
ENSMUSG00000075010	AW112010
ENSMUSG00000004633	Chn2
ENSMUSG00000021948	Prkcd
ENSMUSG00000028159	Dapp1
ENSMUSG00000029713	Gnb2
ENSMUSG00000039208	Metrnl
ENSMUSG00000019256	Ahr
ENSMUSG00000026768	Itga8
ENSMUSG00000023830	Igf2r
ENSMUSG00000040751	Lat2
ENSMUSG00000022512	Cldn1
ENSMUSG00000048779	P2ry6
ENSMUSG00000027293	Ehd4
ENSMUSG00000026341	Actr3
ENSMUSG00000024235	Map3k8
ENSMUSG00000038650	Rnh1
ENSMUSG00000018567	Gabarap
ENSMUSG00000028552	Eps15
ENSMUSG00000028300	3110043O21Rik
ENSMUSG00000037960	1110007C09Rik
ENSMUSG00000032562	Gnai2
ENSMUSG00000036206	Sh3bp4
ENSMUSG00000028163	Nfkb1
ENSMUSG00000022967	Ifnar1
ENSMUSG00000030341	Tnfrsf1a
ENSMUSG00000034902	Pip5k1c
ENSMUSG00000079197	Psme2
ENSMUSG00000001700	Gramd3
ENSMUSG00000020901	Pik3r5
ENSMUSG00000023367	Tmem176a
ENSMUSG00000030844	Rgs10
ENSMUSG00000049103	Ccr2
ENSMUSG00000025492	Ifitm3
ENSMUSG00000026009	Icos
ENSMUSG00000040747	Cd53
ENSMUSG00000030530	Furin
ENSMUSG00000024985	Tcf7l2
ENSMUSG00000036943	Rab8b
ENSMUSG00000037902	Sirpa
ENSMUSG00000026113	Inpp4a
ENSMUSG00000056529	Ptafr
ENSMUSG00000047735	Samd9l
ENSMUSG00000019659	Ccdc12
ENSMUSG00000022965	Ifngr2
ENSMUSG00000032290	Ptpn9
ENSMUSG00000031431	Tsc22d3
ENSMUSG00000044786	Zfp36
ENSMUSG00000022885	St6gal1
ENSMUSG00000079419	Ms4a6c
ENSMUSG00000060216	Arrb2
ENSMUSG00000027009	Itga4
ENSMUSG00000024851	Pitpnm1
ENSMUSG00000021880	Rnase6
ENSMUSG00000063652	Slc22a21
ENSMUSG00000025856	Pdgfa
ENSMUSG00000006360	Crip1
ENSMUSG00000036053	Fmnl2
ENSMUSG00000023349	Clec4n
ENSMUSG00000034652	Cd300a
ENSMUSG00000071715	Ncf4
ENSMUSG00000001025	S100a6
ENSMUSG00000026987	Baz2b
ENSMUSG00000038244	Mical2
ENSMUSG00000026988	Wdsub1
ENSMUSG00000026749	Nek6
ENSMUSG00000003352	Cacnb3
ENSMUSG00000034663	Bmp2k
ENSMUSG00000010358	Ifi35
ENSMUSG00000020048	Hsp90b1
ENSMUSG00000055994	Nod2
ENSMUSG00000063605	Ccdc102a
ENSMUSG00000031659	Adcy7
ENSMUSG00000026727	Rsu1
ENSMUSG00000040663	Clcf1
ENSMUSG00000022969	Il10rb
ENSMUSG00000034445	Cybasc3
ENSMUSG00000049037	Clec4a1
ENSMUSG00000050549	5730508B09Rik
ENSMUSG00000039976	Tbc1d16
ENSMUSG00000026104	Stat1
ENSMUSG00000002504	Slc9a3r2
ENSMUSG00000052684	Jun
ENSMUSG00000067336	Bmpr2
ENSMUSG00000039899	Fgl2
ENSMUSG00000030352	Tspan9
ENSMUSG00000024986	Hhex
ENSMUSG00000024639	Gnaq
ENSMUSG00000040712	Camta2
ENSMUSG00000028745	Capzb
ENSMUSG00000027878	Notch2
ENSMUSG00000032666	1700025G04Rik
ENSMUSG00000015133	Lrrk1
ENSMUSG00000059923	Grb2
ENSMUSG00000032698	Lmo2
ENSMUSG00000041836	Ptpre
ENSMUSG00000036452	Arhgap26
ENSMUSG00000016528	Mapkapk2
ENSMUSG00000019832	Rab32
ENSMUSG00000031875	Cmtm3
ENSMUSG00000061288	Taok3
ENSMUSG00000021250	Fos
ENSMUSG00000060519	Tor3a
ENSMUSG00000026509	Capn2
ENSMUSG00000000753	Serpinf1
ENSMUSG00000056091	St3gal5
ENSMUSG00000017057	Il13ra1
ENSMUSG00000026480	Ncf2
ENSMUSG00000023915	Tnfrsf21
ENSMUSG00000035356	Nfkbiz
ENSMUSG00000070691	Runx3
ENSMUSG00000001750	Tcirg1
ENSMUSG00000050335	Lgals3
ENSMUSG00000060509	Xcr1
ENSMUSG00000079547	H2-DMb1
ENSMUSG00000030199	Etv6
ENSMUSG00000030643	Rab30
ENSMUSG00000042659	Arrdc4
ENSMUSG00000022831	Hcls1
ENSMUSG00000002997	Prkar2b
ENSMUSG00000001542	Ell2
ENSMUSG00000030579	Tyrobp
ENSMUSG00000025278	Flnb
ENSMUSG00000030096	Slc6a6
ENSMUSG00000025178	Pi4k2a
ENSMUSG00000026866	Kynu
ENSMUSG00000025314	Ptprj
ENSMUSG00000044667	D3Bwg0562e
ENSMUSG00000022488	Nckap1l
ENSMUSG00000057522	Spop
ENSMUSG00000035673	Sbno2
ENSMUSG00000026980	Ly75
ENSMUSG00000036478	Btg1
ENSMUSG00000025498	Irf7
ENSMUSG00000024130	Abca3
ENSMUSG00000069833	Ahnak
ENSMUSG00000004698	Hdac9
ENSMUSG00000040859	Bsdc1
ENSMUSG00000039943	Plcb4
ENSMUSG00000087271	2900008C10Rik
ENSMUSG00000041959	S100a10
ENSMUSG00000028064	Sema4a
ENSMUSG00000038642	Ctss
ENSMUSG00000026073	Il1r2
ENSMUSG00000036398	Ppp1r11
ENSMUSG00000030589	Rasgrp4
ENSMUSG00000073421	H2-Ab1
ENSMUSG00000015468	Notch4
ENSMUSG00000016664	Pacsin2
ENSMUSG00000040249	Lrp1
ENSMUSG00000033777	Tlr13
ENSMUSG00000059412	Fxyd2
ENSMUSG00000029213	Commd8
ENSMUSG00000032578	Cish
ENSMUSG00000079523	Tmsb10
ENSMUSG00000006800	Sulf2
ENSMUSG00000034006	Pqlc1
ENSMUSG00000061731	Ext1
ENSMUSG00000028337	Coro2a
ENSMUSG00000042249	Adrbk2
ENSMUSG00000061778	Mospd2
ENSMUSG00000021759	Ppap2a
ENSMUSG00000028634	Hivep3
ENSMUSG00000020458	Rtn4
ENSMUSG00000024300	Myo1f
ENSMUSG00000015243	Abca1
ENSMUSG00000061665	Cd2ap
ENSMUSG00000050445	Cyp8b1
ENSMUSG00000040229	Gpr34
ENSMUSG00000019590	Cyb561
ENSMUSG00000017781	Pitpna
ENSMUSG00000070348	Ccnd1
ENSMUSG00000067212	H2-T23
ENSMUSG00000026360	Rgs2
ENSMUSG00000009772	Nuak2
ENSMUSG00000020476	Dbnl
ENSMUSG00000029992	Gfpt1
ENSMUSG00000045763	Basp1
ENSMUSG00000024725	Ostf1
ENSMUSG00000026656	Fcgr2b
ENSMUSG00000060063	Alox5ap
ENSMUSG00000034708	Grn
ENSMUSG00000001247	Lsr
ENSMUSG00000034738	Nostrin
ENSMUSG00000020926	Adam11
ENSMUSG00000030688	Stard10
ENSMUSG00000034707	Gns
ENSMUSG00000059182	Skap2
ENSMUSG00000038608	Dock10
ENSMUSG00000022973	Synj1
ENSMUSG00000024014	Pim1
ENSMUSG00000036528	Ppfibp2
ENSMUSG00000040350	Trim7
ENSMUSG00000048534	Amica1
ENSMUSG00000051615	Rap2a
ENSMUSG00000006281	Tep1
ENSMUSG00000033577	Myo6
ENSMUSG00000051504	Siglech
ENSMUSG00000026357	Rgs18
ENSMUSG00000004665	Cnn2
ENSMUSG00000051314	Ffar2
ENSMUSG00000026600	Soat1
ENSMUSG00000029304	Spp1
ENSMUSG00000061232	H2-K1
ENSMUSG00000007458	M6pr
ENSMUSG00000002983	Relb
ENSMUSG00000037321	Tap1
ENSMUSG00000005950	P2rx5
ENSMUSG00000000631	Myo18a
ENSMUSG00000024397	Aif1
ENSMUSG00000044477	Zfand3
ENSMUSG00000009376	Met
ENSMUSG00000020198	Ap3d1
ENSMUSG00000035133	Arhgap5
ENSMUSG00000031103	Elf4
ENSMUSG00000027398	Il1b
ENSMUSG00000041926	Rnpep
ENSMUSG00000028480	Glipr2
ENSMUSG00000032336	Nptn
ENSMUSG00000053510	Nrd1
ENSMUSG00000000303	Cdh1
ENSMUSG00000021423	Ly86
ENSMUSG00000053477	Tcf4
ENSMUSG00000022453	Naga
ENSMUSG00000029291	Rufy3
ENSMUSG00000029860	Zyx
ENSMUSG00000054920	Klhl5
ENSMUSG00000055148	Klf2
ENSMUSG00000028656	Cap1
ENSMUSG00000001270	Ckb
ENSMUSG00000028478	Clta
ENSMUSG00000039043	2610034B18Rik
ENSMUSG00000032640	Chsy1
ENSMUSG00000029810	Tmem176b
ENSMUSG00000030107	Usp18
