# Supplementary figures and images for: T-ALL leukemia stem cell 'stemness' is epigenetically controlled by the master regulator SPI1
Source: eLife journal article supplement (doi:10.7554/elife.38314), 2018-11-09

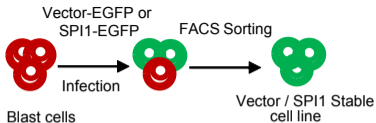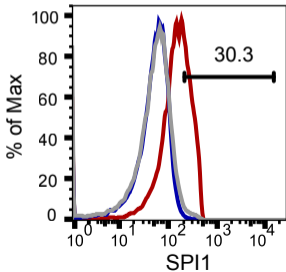

Supplement: supp [file elife-38314-supp-v1.zip › elife_poa_e38314_Figure_4_figure_supplement_1.pdf]
